# Supplementary material for: Palladium-catalyzed C–H glycosylation and retro Diels–Alder tandem reaction via structurally modified norbornadienes (smNBDs)
Source: Royal Society of Chemistry journal article supplement (doi:10.1039/d1sc03569j), 2021-01-01
Supplement: d1sc03569j1.pdf [file d1sc03569j1.pdf]

## **Palladium Catalyzed C-H Glycosylation and Retro Diels-Alder Tandem Reaction via Structurally Modified Norbornadiene (smNBDs)**

Yang An,<sup>1‡</sup> Bo-Sheng Zhang,<sup>2‡</sup> Ya-Nan Ding,<sup>1</sup> Zhe Zhang,<sup>1</sup> Xue-Ya Gou,<sup>1</sup> Xue-Song Li,<sup>1</sup>  
Xiaolei Wang,<sup>1</sup> Yuke Li,<sup>\*3</sup> and Yong-Min Liang<sup>\*1</sup>

<sup>1</sup>State Key Laboratory of Applied Organic Chemistry, Lanzhou University, Lanzhou 730000,  
China

E-mail: [liangym@lzu.edu.cn](mailto:liangym@lzu.edu.cn)

<sup>2</sup>College of Chemistry and Chemical Engineering, Northwest Normal University, Lanzhou,  
Gansu 730070, P.R. China

<sup>3</sup>Department of Chemistry and Centre for Scientific Modeling and Computation, Chinese  
University of Hong Kong, Shatin, Hong Kong, China.

E-mail: [yukeli@link.cuhk.edu.hk](mailto:yukeli@link.cuhk.edu.hk)

## Table of Contents

|                                                                  |            |
|------------------------------------------------------------------|------------|
| <b>S1. GENERAL METHODS</b>                                       | <b>1</b>   |
| <b>S2. OPTIMIZATION OF THE REACTION CONDITIONS</b>               | <b>2</b>   |
| <b>S3. GENERAL PROCEDURE</b>                                     | <b>4</b>   |
| <b>S4. PREPARATION OF SUBSTRATES AND PRODUCT DERIVATIZATION.</b> | <b>5</b>   |
| <b>S5. PREPARATION OF INTERMEDIATE COMPOUND.</b>                 | <b>9</b>   |
| <b>S6. X-RAY CRYSTALLOGRAPHIC INFORMATION</b>                    | <b>11</b>  |
| <b>S8. CHARACTERIZATION DATA</b>                                 | <b>61</b>  |
| <b>S9. NMR SPECTROSCOPIC DATE</b>                                | <b>75</b>  |
| <b>S10. REFERENCE</b>                                            | <b>134</b> |

## S1. General Methods

**General Procedures.** Unless otherwise noted, reactions were performed under an argon atmosphere. Plastic syringes were used to transfer air- and moisture-sensitive reagents. Solvent was freshly distilled/degassed prior to use unless otherwise noted. Analytical TLC was performed with silica gel GF254 plates. For column chromatography, a 200-300 mesh silica gel was employed. Organic solutions were concentrated under reduced pressure using a rotary evaporator. Room temperature (r.t.) is 23-25 °C.

**Materials.** Commercial reagents were purchased from Acros, Accela, Adamas, Alfa, Ark, Aladdin, or TCI, and used as received with the following exceptions. Toluene was dried over calcium hydride. Other commercially available reagents and solvents were used without further purification.

**Instrumentation.** Deuterated solvents were purchased from Cambridge Isotope Laboratories. <sup>1</sup>H NMR spectra were recorded on Bruker AVANCE III 400, Agilent Mercury plus 300 BB and INOVA instruments with 400, 300 and 600 MHz frequencies, and <sup>13</sup>C NMR spectra were recorded on Bruker AVANCE III 400 and Agilent Mercury plus 300 BB instruments with 101 and 75 MHz frequencies. <sup>19</sup>F NMR spectra were recorded on a Bruker AVANCE III 400 spectrometer with a <sup>19</sup>F operating frequency of 376 MHz. Chemical shifts ( $\delta$ ) were reported in ppm relative to the residual solvent signal (CDCl<sub>3</sub>  $\delta$  = 7.26 for <sup>1</sup>H NMR and  $\delta$  = 77.0 for <sup>13</sup>C NMR). Chemical shifts (ppm) were recorded with tetramethylsilane (TMS) as the internal reference standard. Multiplicities are given as s (singlet), d (doublet), t (triplet), dd (doublet of doublets), ddd (doublet of doublet of doublets), dt (doublet of triplets), td (triplet of doublets) or m (multiplet). HRMS was obtained using a Q-TOF instrument equipped with an ESI source. Data collection for crystal structure was performed at room temperature using Mo K $\alpha$  radiation on a Bruker APEXII diffractometer.

## S2. Optimization of The Reaction Conditions

**Table S1** The Screening of the optimal reaction conditions

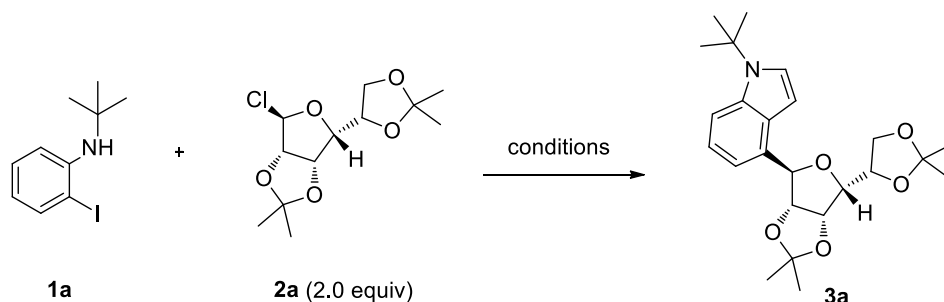

| Entries   | [ M ]                      | Ligand           | [ N ]     | Base                                | Solvent            | Temp(°C)                        | Yield <sup>b</sup> (%) |
|-----------|----------------------------|------------------|-----------|-------------------------------------|--------------------|---------------------------------|------------------------|
| 1         | Pd(OAc) <sub>2</sub>       | PPh <sub>3</sub> | N1        | Cs <sub>2</sub> CO <sub>3</sub>     | 1,4-Dioxane        | 90°C (12h) - 150°C (24h)        | trace                  |
| 2         | Pd(OAc) <sub>2</sub>       | PCy <sub>3</sub> | N1        | Cs <sub>2</sub> CO <sub>3</sub>     | 1,4-Dioxane        | 90°C (12h) - 150°C (24h)        | 11                     |
| 3         | Pd(OAc) <sub>2</sub>       | TFP              | N1        | Cs <sub>2</sub> CO <sub>3</sub>     | 1,4-Dioxane        | 90°C (12h) - 150°C (24h)        | 23                     |
| 4         | Pd(OAc) <sub>2</sub>       | TFP              | N2        | Cs <sub>2</sub> CO <sub>3</sub>     | 1,4-Dioxane        | 90°C (12h) - 150°C (24h)        | 19                     |
| 5         | Pd(OAc) <sub>2</sub>       | TFP              | N3        | Cs <sub>2</sub> CO <sub>3</sub>     | 1,4-Dioxane        | 90°C (12h) - 150°C (24h)        | 7                      |
| 6         | Pd(OAc) <sub>2</sub>       | TFP              | N4        | Cs <sub>2</sub> CO <sub>3</sub>     | 1,4-Dioxane        | 90°C (12h) - 150°C (24h)        | 5                      |
| 7         | Pd(OAc) <sub>2</sub>       | TFP              | N5        | Cs <sub>2</sub> CO <sub>3</sub>     | 1,4-Dioxane        | 90°C (12h) - 150°C (24h)        | 24                     |
| 8         | Pd(OAc) <sub>2</sub>       | TFP              | N6        | Cs <sub>2</sub> CO <sub>3</sub>     | 1,4-Dioxane        | 90°C (12h) - 150°C (24h)        | 11                     |
| 9         | Pd(OAc) <sub>2</sub>       | TFP              | N7        | Cs <sub>2</sub> CO <sub>3</sub>     | 1,4-Dioxane        | 90°C (12h) - 150°C (24h)        | 69                     |
| <b>10</b> | <b>Pd(OAc)<sub>2</sub></b> | <b>TFP</b>       | <b>N8</b> | <b>Cs<sub>2</sub>CO<sub>3</sub></b> | <b>1,4-Dioxane</b> | <b>90°C (12h) - 150°C (24h)</b> | <b>79</b>              |
| 11        | Pd(OAc) <sub>2</sub>       | TFP              | N9        | Cs <sub>2</sub> CO <sub>3</sub>     | 1,4-Dioxane        | 90°C (12h) - 150°C (24h)        | 62                     |
| 12        | Pd(OAc) <sub>2</sub>       | TFP              | N10       | Cs <sub>2</sub> CO <sub>3</sub>     | 1,4-Dioxane        | 90°C (12h) - 150°C (24h)        | 49                     |
| 13        | Pd(OAc) <sub>2</sub>       | TFP              | N11       | Cs <sub>2</sub> CO <sub>3</sub>     | 1,4-Dioxane        | 90°C (12h) - 150°C (24h)        | trace                  |
| 14        | Pd(OAc) <sub>2</sub>       | TFP              | N12       | Cs <sub>2</sub> CO <sub>3</sub>     | 1,4-Dioxane        | 90°C (12h) - 150°C (24h)        | trace                  |
| 15        | Pd(OAc) <sub>2</sub>       | TFP              | N13       | Cs <sub>2</sub> CO <sub>3</sub>     | 1,4-Dioxane        | 90°C (12h) - 150°C (24h)        | trace                  |
| 16        | Pd(OAc) <sub>2</sub>       | TFP              | N8        | Cs <sub>2</sub> CO <sub>3</sub>     | THF                | 90°C (12h) - 150°C (24h)        | 63                     |
| 17        | Pd(OAc) <sub>2</sub>       | TFP              | N8        | Cs <sub>2</sub> CO <sub>3</sub>     | DME                | 90°C (12h) - 150°C (24h)        | trace                  |
| 18        | Pd(OAc) <sub>2</sub>       | TFP              | N8        | Cs <sub>2</sub> CO <sub>3</sub>     | DCE                | 90°C (12h) - 150°C (24h)        | 42                     |
| 19        | Pd(OAc) <sub>2</sub>       | TFP              | N8        | Cs <sub>2</sub> CO <sub>3</sub>     | CH <sub>3</sub> CN | 90°C (12h) - 150°C (24h)        | 40                     |
| 20        | Pd(OAc) <sub>2</sub>       | TFP              | N8        | Cs <sub>2</sub> CO <sub>3</sub>     | DMF                | 90°C (12h) - 150°C (24h)        | trace                  |

<sup>a</sup> Reaction was performed using *N*-(*tert*-butyl)-2-iodoaniline (0.2 mmol), <sup>b</sup> Isolated yield of product **3a** .

Analysis of by-products of N1.

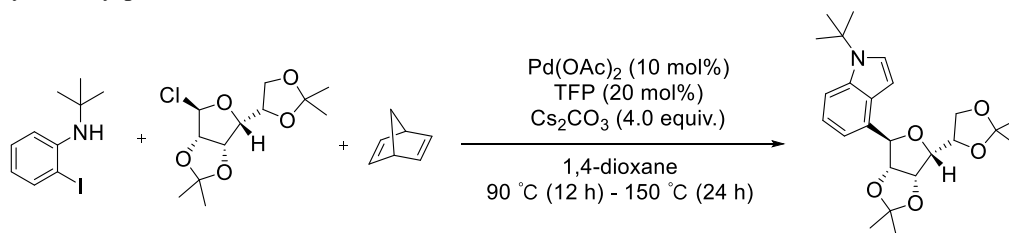

possible byproducts and product (detected by GC-MS)

23 %

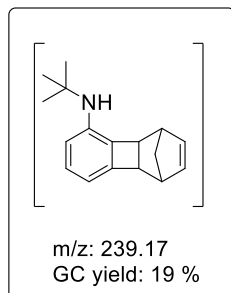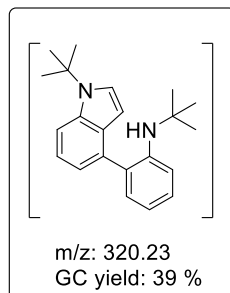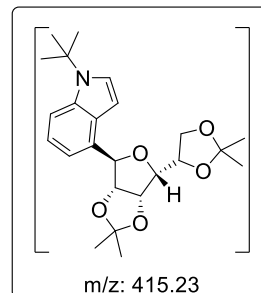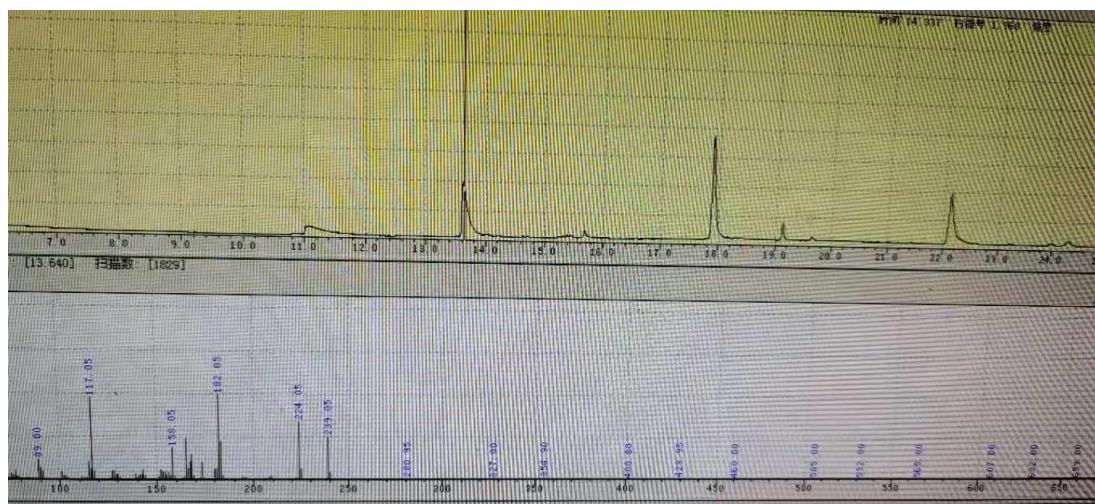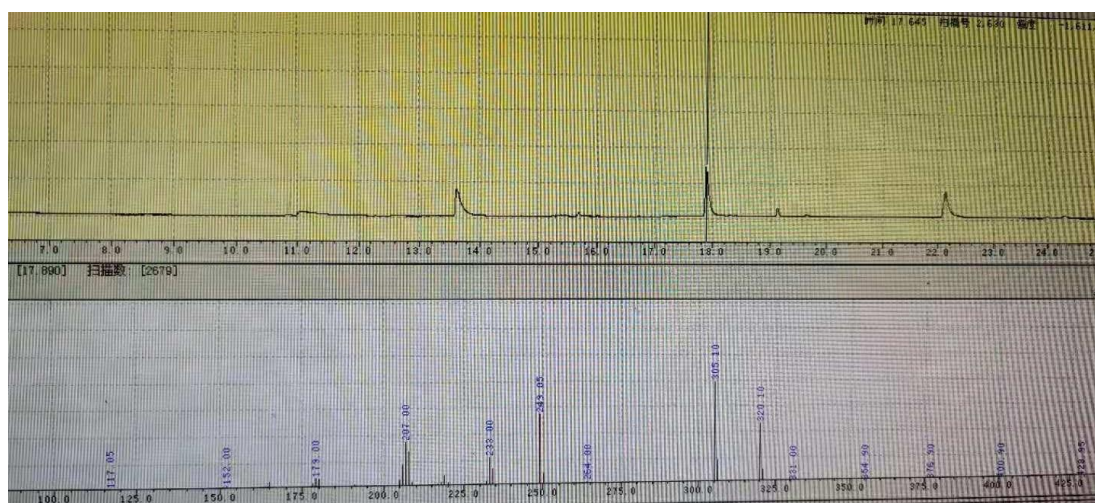

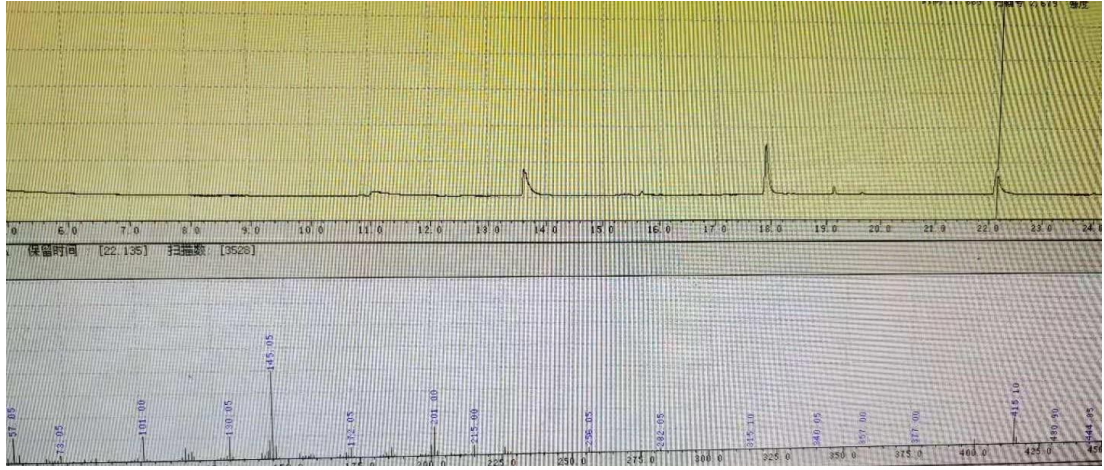

### S3. General Procedure

In a 20 mL tube, **1** (0.2 mmol), **2** (0.4 mmol, 2.0 equiv.), Pd(OAc)<sub>2</sub> (10 mol%), TFP (20 mol%), Cs<sub>2</sub>CO<sub>3</sub> (0.8 mmol, 4.0 equiv.) were added and charged with argon more than three times (The tube was sealed with tipping plug). N8 (0.8 mmol, 4.0 equiv.) were dissolved in 3 mL 1,4-Dioxane, and the mixture was injected into the tube via plastic syringes. Then the white medical adhesive tape was used to reinforce the tipping plug. The resulting light-yellow suspension was stirred vigorously at room temperature for 15 minutes (The time and intensity of stirring at room temperature was important for this reaction) before being placed in a pre-heated oil bath at 90 °C stirring at 900~1200 rpm for 12 h, then place it in a preheated oil bath at 150 °C stirring at 900~1200 rpm for 24 h. After the reaction was completed, the residue was purified with chromatography column on silica gel or preparative TLC (PTLC) (Petroleum ether/EtOAc = 40:1 - 20:1).

#### S4. Preparation of Substrates and Product Derivatization.

##### *N*-(*tert*-butyl)-2-iodoaniline<sup>1</sup>

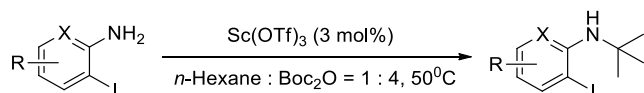

2-Iodoaniline (10 mmol), Sc(OTf)<sub>3</sub> (0.15 g, 0.3 mmol) were added to an 100 mL round flask and round flask was charged with argon more than three times. n-Hexane (10 mL) and Boc<sub>2</sub>O (40 mL) was added into this round flask. The mixture was stirred at 50 °C for 24 h. The reaction needed an open system because a large amount of gas was generated. After the reaction was completed, the residue was purified with chromatography column on silica gel (using petroleum ether as eluant).

##### *N*-alkyl-2-iodoaniline<sup>1</sup>

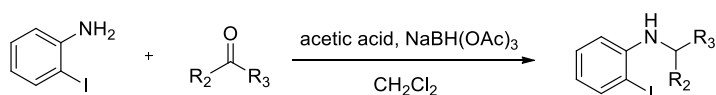

Ketone (15 mmol, 1.5 equiv.), AcOH (1.0 equiv.) were added sequentially to a solution of 2-Iodoaniline (10 mmol) in CH<sub>2</sub>Cl<sub>2</sub> (50 mL) and the mixture was stirred at r.t. for 2 h. Then NaBH(OAc)<sub>3</sub> (30 mmol, 3 equiv.) was added and stirring at r.t. was continued for further 12 h. The reaction mixture was quenched with aq. 1 N NaOH solution and extracted with CH<sub>2</sub>Cl<sub>2</sub>. The combined organic extracts were washed with brine, dried over Na<sub>2</sub>SO<sub>4</sub>, and concentrated under reduced pressure. The crude product was purified by flash column chromatography using petroleum ether as eluant.

##### *D*-mannose Substrate<sup>2</sup>

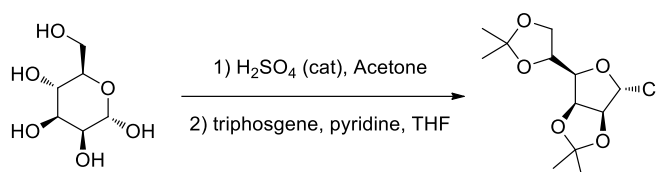

*D*-mannose (10 mmol), H<sub>2</sub>SO<sub>4</sub> (0.12 mL) were added sequentially in acetone (25 mL) and the mixture was stirred at 0 °C for 30 minutes. Afterward the reaction mixture was diluted with EtOAc (50 mL) and washed thoroughly with saturated aq. NaHCO<sub>3</sub> solution, water and brine. The organic layers dried over Na<sub>2</sub>SO<sub>4</sub>, filtered and concentrated under reduced pressure. The crude product was used for next step without further purification.

The product got above was dissolved in dry THF (50 mL), triphosgene (1.2 g, 4.0 mmol, 0.4 equiv) was added, and the mixture was stirred at r.t. with exclusion of moisture. Pyridine (1.0 mL) was added in three portions, and the mixture was allowed to stir at r.t. for 2 h while being monitored by TLC. After the reaction was complete, pyridinium hydrochloride



was filtered, the solid was washed with THF (30 mL), and the filtered and concentrated under reduced pressure below 40 °C. The residue was purified by silica gel flash chromatography to give the desired product.

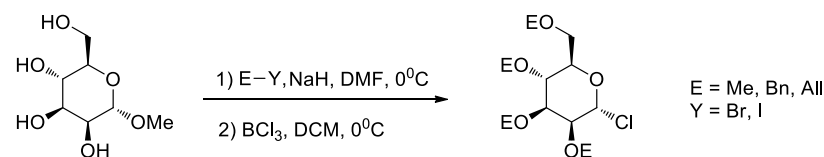

Methyl  $\alpha$ -D-mannopyranoside (10 mmol), NaH (1.5 g, 60 mmol, 6.0 equiv.) were added sequentially in  $\text{CH}_2\text{Cl}_2$  (20 mL) and the mixture was stirred at 0 °C for 1 h. Then X-Y (60 mmol, 6.0 equiv.) was added and stirring at 0 °C. After the complete consumption of Methyl  $\alpha$ -D-mannopyranoside monitored by TLC analysis, the reaction mixture was quenched with EtOAc (50 mL) and washed thoroughly with water and brine. The organic layers dried over  $\text{Na}_2\text{SO}_4$ , filtered and concentrated under reduced pressure. The resulting residue was purified by silica gel flash chromatography to give the desired product.

Boron trichloride (1.5 equiv, 1M in DCM) was slowly to a solution of the product got above (1.0 equiv.) in DCM at 0 °C. After the complete consumption of starting material monitored by TLC analysis, the reaction mixture was diluted with EtOAc (30 mL) and washed with saturated aq.  $\text{NaHCO}_3$ , water and brine. The resulting residue was purified by silica gel flash chromatography to give corresponding compound.

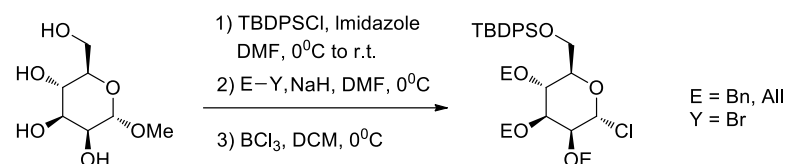

Methyl  $\alpha$ -D-mannopyranoside (10 mmol), imidazole (2.0 g, 30 mmol, 3.0 equiv) were added sequentially in DMF (20 mL), TBDPSCl (2.86 ml, 11 mmol, 1.1 equiv) was added dropwise over a period of 15 min. The reaction mixture was stirred at 0 °C for 17 h, and then the reaction mixture was quenched with EtOAc (50 mL) and washed thoroughly with water and brine. The organic layers dried over  $\text{Na}_2\text{SO}_4$ , filtered and concentrated under reduced pressure to give the desired product.

The product got above (1.0 equiv.), NaH (1.1 g, 45 mmol, 4.5 equiv.) were added sequentially in  $\text{CH}_2\text{Cl}_2$  (20 mL) and the mixture was stirred at 0 °C for 1 h. Then X-Y (45 mmol, 4.5 equiv.) was added and stirring at 0 °C. After the complete consumption of starting material monitored by TLC analysis, the reaction mixture was quenched with EtOAc (50 mL) and washed thoroughly with water and brine. The organic layers dried over  $\text{Na}_2\text{SO}_4$ , filtered and concentrated under reduced pressure. The resulting residue was purified by silica gel flash chromatography to give the desired product.

Boron trichloride (1.5 equiv, 1M in DCM) was slowly to a solution of the product got above (1.0 equiv.) in DCM at 0 °C. After the complete consumption of starting material monitored by TLC analysis, the reaction mixture was diluted with

EtOAc (30 mL) and washed with saturated aq. NaHCO<sub>3</sub>, water and brine. The resulting residue was purified by silica gel flash chromatography to give corresponding compound.

### ***D*-ribofuranose Substrate<sup>2</sup>**

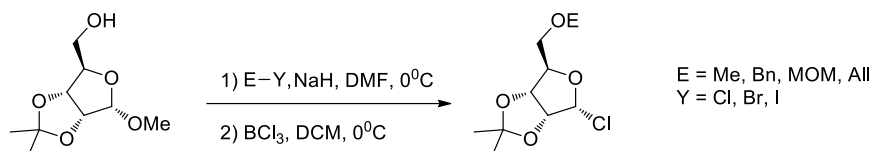

*D*-ribofuranoside (10 mmol), NaH (0.36 g, 15 mmol, 1.5 equiv.) were added sequentially in CH<sub>2</sub>Cl<sub>2</sub> (20 mL) and the mixture was stirred at 0 °C for 1 h. Then X-Y (15 mmol, 1.5 equiv.) was added and stirring at 0 °C. After the complete consumption of *D*-Ribofuranoside monitored by TLC analysis, the reaction mixture was quenched with EtOAc (50 mL) and washed thoroughly with water and brine. The organic layers dried over Na<sub>2</sub>SO<sub>4</sub>, filtered and concentrated under reduced pressure. The resulting residue was purified by silica gel flash chromatography to give the desired product.

Boron trichloride (1.5 equiv, 1M in DCM) was slowly to a solution of the product got above (1.0 equiv.) in DCM at 0 °C. After the complete consumption of starting material monitored by TLC analysis, the reaction mixture was diluted with EtOAc (30 mL) and washed with saturated aq. NaHCO<sub>3</sub>, water and brine. The resulting residue was purified by silica gel flash chromatography to give corresponding compound.

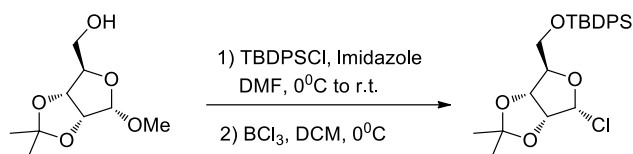

*D*-ribofuranoside (10 mmol), imidazole (2.0 g, 30 mmol, 3.0 equiv) were added sequentially in DMF (20 mL), TBDPSCI (2.86 ml, 11 mmol, 1.1 equiv) was added dropwise over a period of 15 min. The reaction mixture was stirred at 0 °C for 17 h, and then the reaction mixture was quenched with EtOAc (50 mL) and washed thoroughly with water and brine. The organic layers dried over Na<sub>2</sub>SO<sub>4</sub>, filtered and concentrated under reduced pressure to give the desired product.

Boron trichloride (1.5 equiv, 1M in DCM) was slowly to a solution of the product got above (1.0 equiv.) in DCM at 0 °C. After the complete consumption of starting material monitored by TLC analysis, the reaction mixture was diluted with EtOAc (30 mL) and washed with saturated aq. NaHCO<sub>3</sub>, water and brine. The resulting residue was purified by silica gel flash chromatography to give corresponding compound.

### ***L*-rhamnose Substrate<sup>2</sup>**

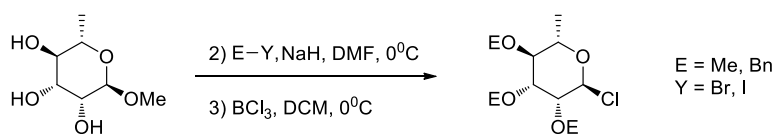

Methyl  $\alpha$ -*L*-rhamnoside (10 mmol), NaH (1.1 g, 45 mmol, 4.5 equiv.) were added sequentially in CH<sub>2</sub>Cl<sub>2</sub> (20 mL) and the

mixture was stirred at 0 °C for 1 h. Then X-Y (45 mmol, 4.5 equiv.) was added and stirring at 0 °C. After the complete consumption of *D*-ribofuranoside monitored by TLC analysis, the reaction mixture was quenched with EtOAc (50 mL) and washed thoroughly with water and brine. The organic layers dried over Na<sub>2</sub>SO<sub>4</sub>, filtered and concentrated under reduced pressure. The resulting residue was purified by silica gel flash chromatography to give the desired product.

Boron trichloride (1.5 equiv, 1M in DCM) was slowly to a solution of the product got above (1.0 equiv.) in DCM at 0 °C. After the complete consumption of starting material monitored by TLC analysis, the reaction mixture was diluted with EtOAc (30 mL) and washed with saturated aq. NaHCO<sub>3</sub>, water and brine. The resulting residue was purified by silica gel flash chromatography to give corresponding compound.

### Deprotection of Production.<sup>3</sup>

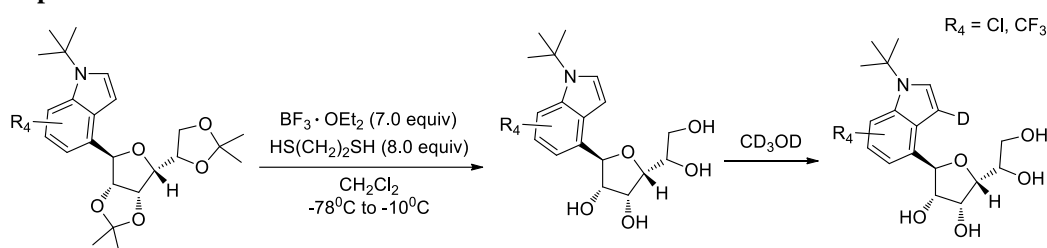

Mannofuranosyl indole (0.2 mmol), 1,2-ethanedithiol (0.14 mL, 1.60 mmol, 8.0 equiv) and boron trifluoride diethyl etherate (0.17 mL, 14.0 mmol, 7.0 equiv) were added sequentially at -78 °C in CH<sub>2</sub>Cl<sub>2</sub> (3 mL). After the mixture was stirred at -20 °C for 16 h, the reaction was quenched with 10% KOH (5 mL). The volatiles were then removed by rotary evaporation. The residue was quenched with EtOAc (50 mL) and washed thoroughly with water and brine. The organic layers dried over Na<sub>2</sub>SO<sub>4</sub>, filtered and concentrated under reduced pressure. The resulting residue was purified by silica gel flash chromatography to give corresponding compound. It is worth noting that in the deprotected product in a deuterated methanol solvent, the hydrogen atom at the indole's C3 position will be replaced by a deuterium atom to generate corresponding deuterated products.

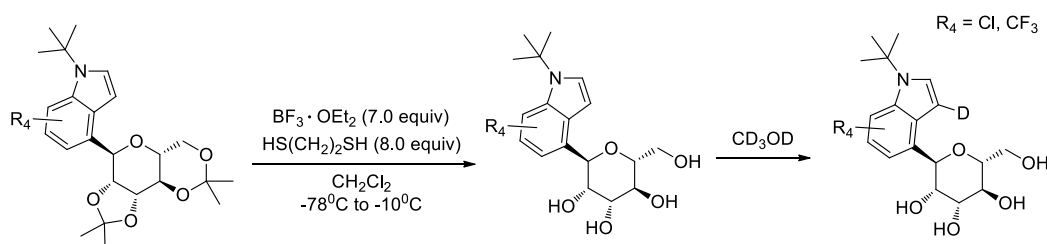

Mannopyranosyl indole (0.2 mmol), 1,2-ethanedithiol (0.14 mL, 1.60 mmol, 8.0 equiv) and boron trifluoride diethyl etherate (0.17 mL, 14.0 mmol, 7.0 equiv) were added sequentially at -78 °C in CH<sub>2</sub>Cl<sub>2</sub> (3 mL). After the mixture was stirred at -20 °C for 16 h, the reaction was quenched with 10% KOH (5 mL). The volatiles were then removed by rotary evaporation. The residue was quenched with EtOAc (50 mL) and washed thoroughly with water and brine. The organic layers dried over Na<sub>2</sub>SO<sub>4</sub>, filtered and concentrated under reduced pressure. The resulting residue was purified by silica

gel flash chromatography to give corresponding compound. It is worth noting that in the deprotected product in a deuterated methanol solvent, the hydrogen atom at the indole's C3 position will be replaced by a deuterium atom to generate corresponding deuterated products.

### S5. Preparation of intermediate compound.<sup>4</sup>

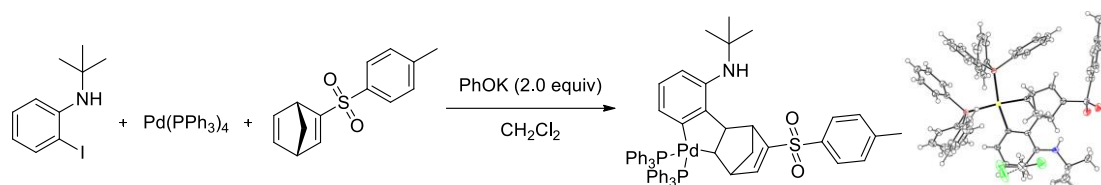

In an argon-filled glove box, Pd(PPh<sub>3</sub>)<sub>4</sub> (0.58 g, 0.5 mmol), *N*-(tert-butyl)-2-iodoaniline (0.69 g, 2.5 mmol), N8 (0.62 mg, 2.5 mmol), and PhOK (0.13 g, 1 mmol) were added sequentially in CH<sub>2</sub>Cl<sub>2</sub> (15 mL). After the mixture was stirred for 24 h. After cooling to room temperature. the solid was filtered through Celite in the glove box and the filtrate was concentrated to dryness under reduced pressure. The residue was then dissolved in 15 mL of dry Et<sub>2</sub>O and the desired complex slowly precipitated at room temperature as light yellow solid. The solid was collected on a sintered funnel and washed with about 20 mL of diethyl ether, and characterized by single crystal diffraction.

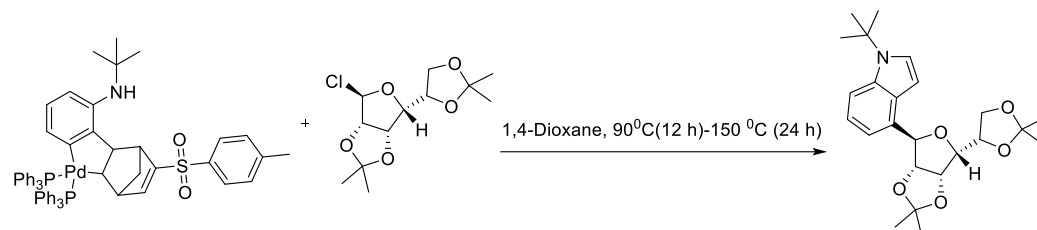

In a 20 mL tube, the intermediate compound (0.2 mmol) and **2** (0.4 mmol, 2.0 equiv.) were added and charged with argon more than three times (The tube was sealed with tipping plug). N8 (0.8 mmol, 4.0 equiv.) 3 mL 1,4-Dioxane was injected into the tube via plastic syringes. The resulting light-yellow suspension was stirred vigorously at room temperature for 15 minutes (The time and intensity of stirring at room temperature was important for this reaction) before being placed in a pre-heated oil bath at 90 °C stirring at 900~1200 rpm for 12 h, then place it in a preheated oil bath at 150 °C stirring at 900~1200 rpm for 24 h. After the reaction was completed, the residue was purified with chromatography column on silica gel or preparative TLC (PTLC) (Petroleum ether/EtOAc = 40:1 - 20:1).

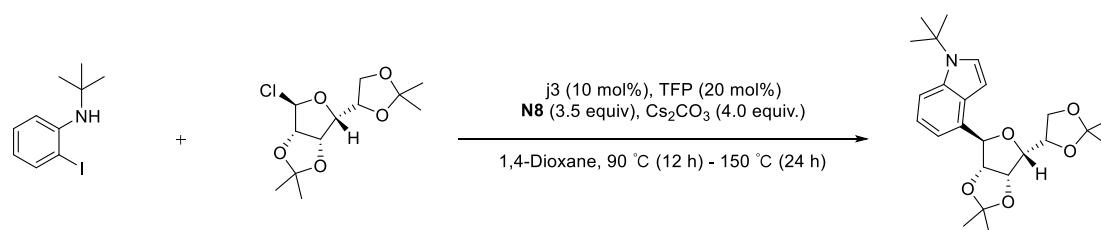

In a 20 mL tube, **1** (0.2 mmol), **2** (0.4 mmol, 2.0 equiv.), the intermediate compound (10 mol%), TFP (20 mol%), Cs<sub>2</sub>CO<sub>3</sub>

(0.8 mmol, 4.0 equiv.) were added and charged with argon more than three times (The tube was sealed with tipping plug). N8 (0.8 mmol, 4.0 equiv.) 3 mL 1,4-Dioxane was injected into the tube via plastic syringes. The resulting light-white suspension was stirred vigorously at room temperature for 15 minutes (The time and intensity of stirring at room temperature was important for this reaction) before being placed in a pre-heated oil bath at 90 °C stirring at 900~1200 rpm for 12 h, then place it in a preheated oil bath at 150 °C stirring at 900~1200 rpm for 24 h. After the reaction was completed, the residue was purified with chromatography column on silica gel or preparative TLC (PTLC) (Petroleum ether/EtOAc = 40:1 - 20:1).

## S6. X-ray Crystallographic Information

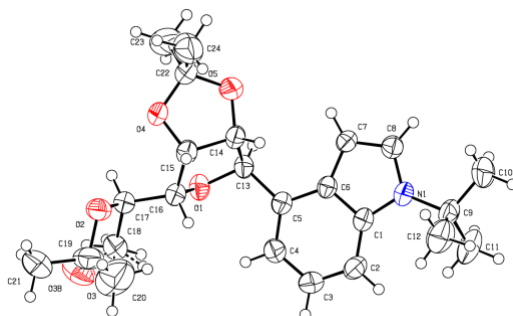

**Table S2 Crystal data and structure refinement for compound 3a. (CCDC : 2047890)**

|                                             |                                                               |
|---------------------------------------------|---------------------------------------------------------------|
| Empirical formula                           | C <sub>24</sub> H <sub>33</sub> NO <sub>5</sub>               |
| Formula weight                              | 415.51                                                        |
| Temperature/K                               | 225(50)                                                       |
| Crystal system                              | monoclinic                                                    |
| Space group                                 | P2 <sub>1</sub>                                               |
| a/Å                                         | 9.3272(3)                                                     |
| b/Å                                         | 10.7693(3)                                                    |
| c/Å                                         | 12.3819(3)                                                    |
| $\alpha$ /°                                 | 90                                                            |
| $\beta$ /°                                  | 108.361(3)                                                    |
| $\gamma$ /°                                 | 90                                                            |
| Volume/Å <sup>3</sup>                       | 1180.42(6)                                                    |
| Z                                           | 2                                                             |
| $\rho_{\text{calc}}$ /cm <sup>3</sup>       | 1.169                                                         |
| $\mu$ /mm <sup>-1</sup>                     | 0.656                                                         |
| F(000)                                      | 448.0                                                         |
| Crystal size/mm <sup>3</sup>                | 0.07 × 0.04 × 0.03                                            |
| Radiation                                   | CuK $\alpha$ ( $\lambda$ = 1.54184)                           |
| 2 $\theta$ range for data collection/°      | 7.522 to 133.154                                              |
| Index ranges                                | -8 ≤ h ≤ 11, -12 ≤ k ≤ 12, -14 ≤ l ≤ 10                       |
| Reflections collected                       | 12480                                                         |
| Independent reflections                     | 4124 [R <sub>int</sub> = 0.0345, R <sub>sigma</sub> = 0.0306] |
| Data/restraints/parameters                  | 4124/1/287                                                    |
| Goodness-of-fit on F <sup>2</sup>           | 1.035                                                         |
| Final R indexes [I >= 2 $\sigma$ (I)]       | R <sub>1</sub> = 0.0379, wR <sub>2</sub> = 0.0951             |
| Final R indexes [all data]                  | R <sub>1</sub> = 0.0405, wR <sub>2</sub> = 0.0991             |
| Largest diff. peak/hole / e Å <sup>-3</sup> | 0.11/-0.17                                                    |
| Flack parameter                             | 0.02(10)                                                      |

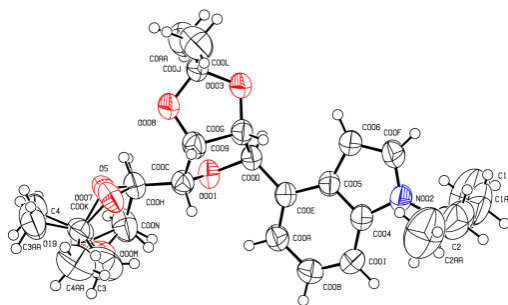

**Table S3 Crystal data and structure refinement for compound 3j. (CCDC : 2047891)**

|                                             |                                                               |
|---------------------------------------------|---------------------------------------------------------------|
| Empirical formula                           | C <sub>25</sub> H <sub>35</sub> NO <sub>5</sub>               |
| Formula weight                              | 429.54                                                        |
| Temperature/K                               | 293.77(10)                                                    |
| Crystal system                              | monoclinic                                                    |
| Space group                                 | I2                                                            |
| a/Å                                         | 11.0067(3)                                                    |
| b/Å                                         | 9.2663(2)                                                     |
| c/Å                                         | 24.1638(8)                                                    |
| $\alpha$ /°                                 | 90                                                            |
| $\beta$ /°                                  | 99.360(3)                                                     |
| $\gamma$ /°                                 | 90                                                            |
| Volume/Å <sup>3</sup>                       | 2431.67(13)                                                   |
| Z                                           | 4                                                             |
| $\rho_{\text{calc}}/\text{cm}^3$            | 1.173                                                         |
| $\mu/\text{mm}^{-1}$                        | 0.652                                                         |
| F(000)                                      | 928.0                                                         |
| Crystal size/mm <sup>3</sup>                | 0.12 × 0.08 × 0.05                                            |
| Radiation                                   | Cu K $\alpha$ ( $\lambda$ = 1.54184)                          |
| 2 $\theta$ range for data collection/°      | 8.38 to 133.202                                               |
| Index ranges                                | -12 ≤ h ≤ 13, -11 ≤ k ≤ 10, -26 ≤ l ≤ 28                      |
| Reflections collected                       | 7101                                                          |
| Independent reflections                     | 3898 [R <sub>int</sub> = 0.0187, R <sub>sigma</sub> = 0.0249] |
| Data/restraints/parameters                  | 3898/25/324                                                   |
| Goodness-of-fit on F <sup>2</sup>           | 1.056                                                         |
| Final R indexes [I ≥ 2 $\sigma$ (I)]        | R <sub>1</sub> = 0.0426, wR <sub>2</sub> = 0.1053             |
| Final R indexes [all data]                  | R <sub>1</sub> = 0.0478, wR <sub>2</sub> = 0.1115             |
| Largest diff. peak/hole / e Å <sup>-3</sup> | 0.15/-0.16                                                    |
| Flack parameter                             | 0.09(9)                                                       |

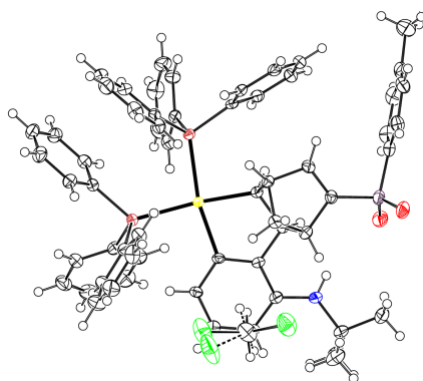

**Table S4 Crystal data and structure refinement for intermediate compound. (CCDC : 2067951)**

|                                             |                                                                                    |
|---------------------------------------------|------------------------------------------------------------------------------------|
| Empirical formula                           | C <sub>61</sub> H <sub>59</sub> Cl <sub>2</sub> NO <sub>2</sub> P <sub>2</sub> PdS |
| Formula weight                              | 1109.39                                                                            |
| Temperature/K                               | 149.99(10)                                                                         |
| Crystal system                              | triclinic                                                                          |
| Space group                                 | P-1                                                                                |
| a/Å                                         | 11.5489(3)                                                                         |
| b/Å                                         | 13.5596(5)                                                                         |
| c/Å                                         | 18.1117(6)                                                                         |
| $\alpha$ /°                                 | 70.689(3)                                                                          |
| $\beta$ /°                                  | 89.007(2)                                                                          |
| $\gamma$ /°                                 | 77.468(2)                                                                          |
| Volume/Å <sup>3</sup>                       | 2608.35(15)                                                                        |
| Z                                           | 2                                                                                  |
| $\rho_{\text{calc}}$ /cm <sup>3</sup>       | 1.413                                                                              |
| $\mu$ /mm <sup>-1</sup>                     | 5.115                                                                              |
| F(000)                                      | 1148.0                                                                             |
| Crystal size/mm <sup>3</sup>                | 0.12 × 0.1 × 0.02                                                                  |
| Radiation                                   | Cu K $\alpha$ ( $\lambda$ = 1.54184)                                               |
| 2 $\theta$ range for data collection/°      | 5.18 to 152.114                                                                    |
| Index ranges                                | -10 ≤ h ≤ 14, -17 ≤ k ≤ 17, -22 ≤ l ≤ 22                                           |
| Reflections collected                       | 25457                                                                              |
| Independent reflections                     | 9750[R <sub>int</sub> = 0.0526, R <sub>sigma</sub> = 0.0616]                       |
| Data/restraints/parameters                  | 9750/0/644                                                                         |
| Goodness-of-fit on F <sup>2</sup>           | 1.032                                                                              |
| Final R indexes [I ≥ 2 $\sigma$ (I)]        | R <sub>1</sub> = 0.0415, wR <sub>2</sub> = 0.0960                                  |
| Final R indexes [all data]                  | R <sub>1</sub> = 0.0523, wR <sub>2</sub> = 0.1002                                  |
| Largest diff. peak/hole / e Å <sup>-3</sup> | 0.72/-0.91                                                                         |



## S7. Computational details

All the calculations were performed using the Gaussian 09 programs<sup>1</sup>. All of the structures were fully optimized with the B3LYP<sup>2-3</sup> method and Ahlrichs' split-valence def2-SVP basis set<sup>4</sup> in 1,4-dioxane solvent employing the Polarizable Continuum Model (PCM)<sup>5</sup>. The temperature is 353.15K. Grimmes's DFT-D3 dispersion correction was used to describe the van der Waals interaction.<sup>6</sup> Vibrational frequency calculations were performed to ensure that a transition state has only one imaginary frequency and a local minimum has no imaginary frequency. Transition states connecting relevant minima were further examined by running intrinsic reaction coordinate (IRC) calculations.

## References

1. M. J. Frisch, G. W. Trucks, H. B. Schlegel, G. E. Scuseria, M. A. Robb, J. R. Cheeseman, G. Scalmani, V. Barone, B. Mennucci, G. A. Petersson, H. Nakatsuji, M. Caricato, X. Li, H. P. Hratchian, A. F. Izmaylov, J. Bloino, G. Zheng, J. L. Sonnenberg, M. Hada, M. Ehara, K. Toyota, R. Fukuda, J. Hasegawa, M. Ishida, T. Nakajima, Y. Honda, O. Kitao, H. Nakai, T. Vreven, J. A. Montgomery, J. E. Peralta, F. Ogliaro, M. Bearpark, J. J. Heyd, E. Brothers, K. N. Kudin, V. N. Staroverov, R. Kobayashi, J. Normand, K. Raghavachari, A. Rendell, J. C. Burant, S. S. Iyengar, J. Tomasi, M. Cossi, N. Rega, J. M. Millam, M. Klene, J. E. Knox, J. B. Cross, V. Bakken, C. Adamo, J. Jaramillo, R. Gomperts, R. E. Stratmann, O. Yazyev, A. J. Austin, R. Cammi, C. Pomelli, J. W. Ochterski, R. L. Martin, K. Morokuma, V. G. Zakrzewski, G. A. Voth, P. Salvador, J. J. Dannenberg, S. A. D. Dapprich, Daniels, J. B. Farkas Foresman, J. V. Ortiz, J. Cioslowski, and D. J. Fox, *Gaussian 09 Revision D.01*. **2009**.
2. C. Lee, W. Yang, and R. G. Parr, *Physical Review B* **1988**, 37 (2), 785-789.
3. A. D. Becke, *The Journal of Chemical Physics* **1993**, 98 (2), 1372-1377.
4. F. Weigend, and R. Ahlrichs, *Physical Chemistry Chemical Physics* **2005**, 7 (18), 3297-3305.
5. J. Tomasi, B. Mennucci, R. Cammi, *Chem Rev* **2005**, 105 (8), 2999-3093.
6. S. Grimme, J. Antony, S. Ehrlich, and H. Krieg, *The Journal of Chemical Physics* **2010**, 132 (15), 154104.

## Cartesian Coordinates And Energy

### 1a

G= -741.584844 Hartree

|   |          |          |          |
|---|----------|----------|----------|
| I | 1.37849  | -1.83969 | 0.47352  |
| C | 0.66762  | -0.95813 | -2.35630 |
| C | -0.11101 | -0.69817 | -3.48759 |
| C | -1.47952 | -0.97206 | -3.43215 |
| C | -2.06359 | -1.49163 | -2.27923 |
| C | -1.30815 | -1.76782 | -1.10956 |
| C | 0.08506  | -1.47841 | -1.20096 |
| H | 1.73965  | -0.75288 | -2.37433 |
| H | 0.34979  | -0.29044 | -4.38954 |
| H | -2.11348 | -0.78003 | -4.30184 |
| H | -3.13222 | -1.69078 | -2.28114 |
| H | -1.18220 | -2.42292 | 0.79099  |
| N | -1.84833 | -2.27738 | 0.04220  |
| C | -3.23714 | -2.63193 | 0.37853  |
| C | -3.19331 | -3.13094 | 1.83420  |
| H | -2.82312 | -2.34191 | 2.50880  |
| H | -4.19910 | -3.42232 | 2.16984  |

|   |          |          |          |
|---|----------|----------|----------|
| H | -2.53403 | -4.00912 | 1.92837  |
| C | -3.76082 | -3.77584 | -0.51397 |
| H | -3.81887 | -3.48939 | -1.57275 |
| H | -3.09727 | -4.65100 | -0.43794 |
| H | -4.77073 | -4.07557 | -0.19300 |
| C | -4.16771 | -1.40370 | 0.31171  |
| H | -3.78957 | -0.60492 | 0.96816  |
| H | -4.24941 | -0.99294 | -0.70359 |
| H | -5.18114 | -1.67769 | 0.64428  |

**Cs<sub>2</sub>CO<sub>3</sub>**

G= -304.097467 Hartree

|    |          |          |          |
|----|----------|----------|----------|
| C  | -0.33816 | 0.50314  | 0.00851  |
| O  | 0.27821  | -0.62130 | 0.06453  |
| O  | -1.66388 | 0.51146  | 0.05987  |
| O  | 0.28621  | 1.61978  | -0.09460 |
| Cs | -1.88158 | -2.34133 | -0.02773 |
| Cs | -1.83620 | 3.36384  | 0.19222  |

**N8**

G= -1089.642542 Hartree

|   |          |          |          |
|---|----------|----------|----------|
| C | -1.94947 | 1.49352  | 1.20581  |
| C | -0.45806 | 1.35238  | 1.58583  |
| C | -0.59794 | 2.94409  | 0.00419  |
| C | -2.03037 | 2.44008  | 0.26219  |
| H | -2.74963 | 0.87170  | 1.60865  |
| H | -2.90784 | 2.77522  | -0.29084 |
| C | -0.03874 | 2.84854  | 1.45477  |
| H | 1.04881  | 3.00689  | 1.51301  |
| H | -0.56118 | 3.50843  | 2.16282  |
| C | 0.26701  | 0.79458  | 0.34314  |
| C | 0.18212  | 1.75360  | -0.58779 |
| H | 0.68958  | -0.20437 | 0.24031  |
| H | -0.24519 | 0.83621  | 2.53020  |
| H | -0.49240 | 3.89111  | -0.53737 |
| S | 0.63929  | 1.74486  | -2.28947 |
| O | -0.61560 | 1.82229  | -3.06085 |
| O | 1.67516  | 2.77446  | -2.48637 |
| C | 1.37592  | 0.13228  | -2.54602 |
| C | 2.75453  | -0.02220 | -2.38414 |
| C | 0.55638  | -0.94559 | -2.89087 |
| C | 3.31575  | -1.28745 | -2.56189 |
| H | 3.36996  | 0.84246  | -2.12920 |
| C | 1.13531  | -2.20285 | -3.06378 |
| H | -0.51574 | -0.78971 | -3.02412 |
| C | 2.51931  | -2.39480 | -2.90239 |
| H | 4.39392  | -1.41849 | -2.43651 |

|   |         |          |          |
|---|---------|----------|----------|
| H | 0.50205 | -3.05271 | -3.33250 |
| C | 3.13885 | -3.75129 | -3.12432 |
| H | 2.44433 | -4.56219 | -2.85739 |
| H | 3.40414 | -3.88498 | -4.18754 |
| H | 4.06175 | -3.87606 | -2.53836 |

**L**

G= -1028.934977 Hartree

|   |          |          |          |
|---|----------|----------|----------|
| P | 2.22990  | -1.70936 | 0.30980  |
| C | 2.73164  | -2.08328 | -1.41077 |
| C | 2.35914  | -3.02501 | -2.33750 |
| O | 3.64374  | -1.23023 | -1.96953 |
| C | 3.09498  | -2.73203 | -3.53185 |
| H | 1.64700  | -3.83022 | -2.17322 |
| C | 3.86018  | -1.63633 | -3.24424 |
| H | 3.05986  | -3.26686 | -4.47901 |
| H | 4.57642  | -1.05436 | -3.81972 |
| C | 3.52753  | -2.58117 | 1.24440  |
| C | 4.27115  | -2.15271 | 2.31639  |
| O | 3.92042  | -3.84997 | 0.90359  |
| C | 5.16340  | -3.22123 | 2.65407  |
| H | 4.18690  | -1.18224 | 2.80161  |
| C | 4.90176  | -4.22124 | 1.75950  |
| H | 5.90372  | -3.24132 | 3.45123  |
| H | 5.32018  | -5.21423 | 1.61027  |
| C | 0.85558  | -2.90316 | 0.46288  |
| C | 0.76355  | -4.24833 | 0.72711  |
| O | -0.40313 | -2.38557 | 0.30918  |
| C | -0.63228 | -4.56867 | 0.73101  |
| H | 1.60414  | -4.91810 | 0.88922  |
| C | -1.28753 | -3.39735 | 0.46702  |
| H | -1.08835 | -5.54095 | 0.90706  |
| H | -2.33901 | -3.13749 | 0.36822  |

**A**

G= -2185.865476 Hartree

|    |         |          |          |
|----|---------|----------|----------|
| Pd | 1.14358 | 0.48947  | 0.04966  |
| P  | 1.86745 | -1.67493 | -0.00967 |
| C  | 2.35252 | -2.43997 | -1.59453 |
| C  | 2.15664 | -3.67632 | -2.15793 |
| O  | 3.03486 | -1.64179 | -2.46909 |
| C  | 2.76299 | -3.62934 | -3.45544 |
| H  | 1.64070 | -4.51229 | -1.69176 |
| C  | 3.28180 | -2.37064 | -3.58370 |
| H  | 2.80570 | -4.42619 | -4.19537 |
| H  | 3.82776 | -1.86565 | -4.37714 |
| C  | 3.34805 | -1.94492 | 1.00962  |

|   |          |          |          |
|---|----------|----------|----------|
| C | 4.05751  | -1.06319 | 1.78619  |
| O | 3.94412  | -3.17759 | 1.05840  |
| C | 5.14849  | -1.80205 | 2.34883  |
| H | 3.81523  | -0.01089 | 1.91972  |
| C | 5.02499  | -3.07676 | 1.86974  |
| H | 5.92519  | -1.43332 | 3.01568  |
| H | 5.60824  | -3.98443 | 2.00827  |
| C | 0.74244  | -2.95848 | 0.62695  |
| C | 0.92110  | -4.16509 | 1.25890  |
| O | -0.59499 | -2.71631 | 0.47846  |
| C | -0.38812 | -4.68945 | 1.50811  |
| H | 1.88097  | -4.61160 | 1.50534  |
| C | -1.26461 | -3.76526 | 1.00848  |
| H | -0.64407 | -5.62780 | 1.99621  |
| H | -2.34996 | -3.71478 | 0.96342  |
| P | 0.72035  | 2.63289  | 0.71293  |
| C | -0.90845 | 3.38233  | 0.36994  |
| C | -1.32177 | 4.63002  | -0.02606 |
| O | -1.99158 | 2.55708  | 0.48539  |
| C | -2.74718 | 4.56116  | -0.15498 |
| H | -0.67597 | 5.48726  | -0.20051 |
| C | -3.09364 | 3.27937  | 0.17237  |
| H | -3.42428 | 5.35918  | -0.45331 |
| H | -4.04383 | 2.75289  | 0.22319  |
| C | 0.86624  | 2.84195  | 2.51242  |
| C | 1.20797  | 1.93052  | 3.48005  |
| O | 0.59425  | 4.04989  | 3.09877  |
| C | 1.14809  | 2.62400  | 4.73231  |
| H | 1.46158  | 0.88848  | 3.29602  |
| C | 0.77022  | 3.90397  | 4.43466  |
| H | 1.35285  | 2.22302  | 5.72285  |
| H | 0.58841  | 4.78747  | 5.04262  |
| C | 1.81280  | 3.95644  | 0.10167  |
| C | 2.25087  | 5.15384  | 0.61333  |
| O | 2.36181  | 3.76276  | -1.13560 |
| C | 3.11743  | 5.72375  | -0.37435 |
| H | 1.97498  | 5.56533  | 1.58085  |
| C | 3.14102  | 4.83299  | -1.41259 |
| H | 3.65378  | 6.66899  | -0.31891 |
| H | 3.64927  | 4.82138  | -2.37391 |

## B

G= -1898.494647 Hartree

|    |          |          |          |
|----|----------|----------|----------|
| Pd | 0.27942  | -0.61361 | 0.50442  |
| P  | -1.86760 | -0.10089 | 0.12994  |
| C  | -2.05901 | 1.24966  | -1.08927 |
| C  | -2.75053 | 2.43457  | -1.10261 |

|   |          |          |          |
|---|----------|----------|----------|
| O | -1.30350 | 1.14983  | -2.22563 |
| C | -2.39912 | 3.09585  | -2.32556 |
| H | -3.42744 | 2.78275  | -0.32636 |
| C | -1.52296 | 2.26550  | -2.96606 |
| H | -2.75443 | 4.06093  | -2.68135 |
| H | -0.99105 | 2.32644  | -3.91230 |
| C | -2.93216 | -1.39427 | -0.57277 |
| C | -2.64786 | -2.70974 | -0.83933 |
| O | -4.21575 | -1.11642 | -0.96401 |
| C | -3.82956 | -3.27276 | -1.42181 |
| H | -1.69639 | -3.19895 | -0.64078 |
| C | -4.74388 | -2.25726 | -1.47030 |
| H | -3.97875 | -4.29524 | -1.76257 |
| H | -5.77004 | -2.19559 | -1.82586 |
| C | -2.90788 | 0.55460  | 1.47475  |
| C | -4.26236 | 0.63473  | 1.69024  |
| O | -2.24587 | 1.10322  | 2.53827  |
| C | -4.43429 | 1.27157  | 2.96116  |
| H | -5.03035 | 0.27773  | 1.00890  |
| C | -3.17319 | 1.53329  | 3.42348  |
| H | -5.37051 | 1.50172  | 3.46597  |
| H | -2.79285 | 1.99707  | 4.33060  |
| I | 2.66470  | -2.10193 | -1.02559 |
| C | 2.36744  | -1.36785 | 1.98501  |
| C | 2.58950  | -0.61939 | 3.14650  |
| C | 2.89880  | 0.73726  | 3.02667  |
| C | 2.97183  | 1.35596  | 1.77870  |
| C | 2.75048  | 0.64866  | 0.57193  |
| C | 2.43343  | -0.75313 | 0.71093  |
| H | 2.19141  | -2.44279 | 2.05118  |
| H | 2.52859  | -1.10211 | 4.12383  |
| H | 3.09084  | 1.33460  | 3.92160  |
| H | 3.22959  | 2.41159  | 1.72727  |
| H | 2.67074  | 0.56103  | -1.41574 |
| N | 2.87708  | 1.22086  | -0.67387 |
| C | 2.52190  | 2.60924  | -1.05954 |
| C | 2.32178  | 2.56621  | -2.58468 |
| H | 1.48790  | 1.89530  | -2.84614 |
| H | 2.08518  | 3.56884  | -2.96980 |
| H | 3.23395  | 2.20942  | -3.08973 |
| C | 3.67354  | 3.58038  | -0.74025 |
| H | 3.84502  | 3.68310  | 0.34034  |
| H | 4.60941  | 3.22753  | -1.19996 |
| H | 3.44476  | 4.58319  | -1.13434 |
| C | 1.20867  | 3.06970  | -0.39975 |
| H | 0.39485  | 2.36857  | -0.63198 |
| H | 1.29103  | 3.12866  | 0.69403  |

|   |         |         |          |
|---|---------|---------|----------|
| H | 0.92761 | 4.06600 | -0.77419 |
|---|---------|---------|----------|

**C-ts**

G= -1898.491723 Hartree

|    |          |          |          |
|----|----------|----------|----------|
| Pd | 0.26128  | -0.56883 | 0.54358  |
| P  | -1.89482 | -0.06786 | 0.12292  |
| C  | -2.09476 | 1.35378  | -1.00957 |
| C  | -2.82959 | 2.51135  | -0.96301 |
| O  | -1.31149 | 1.35544  | -2.13167 |
| C  | -2.47579 | 3.26377  | -2.13135 |
| H  | -3.53742 | 2.78242  | -0.18348 |
| C  | -1.55538 | 2.50919  | -2.80260 |
| H  | -2.85864 | 4.23700  | -2.43201 |
| H  | -1.00280 | 2.65243  | -3.72779 |
| C  | -2.90297 | -1.34311 | -0.68522 |
| C  | -2.57267 | -2.63126 | -1.02294 |
| O  | -4.18330 | -1.07718 | -1.09463 |
| C  | -3.72172 | -3.18999 | -1.67097 |
| H  | -1.61241 | -3.10491 | -0.82867 |
| C  | -4.66401 | -2.19921 | -1.68353 |
| H  | -3.83167 | -4.19344 | -2.07697 |
| H  | -5.68177 | -2.14442 | -2.06348 |
| C  | -2.98159 | 0.46916  | 1.48274  |
| C  | -4.33939 | 0.46183  | 1.69132  |
| O  | -2.35707 | 1.00500  | 2.57519  |
| C  | -4.55349 | 1.02851  | 2.98892  |
| H  | -5.08324 | 0.09410  | 0.98918  |
| C  | -3.31194 | 1.34034  | 3.47230  |
| H  | -5.50385 | 1.18096  | 3.49671  |
| H  | -2.96325 | 1.78301  | 4.40238  |
| I  | 2.37368  | -2.21654 | -0.74633 |
| C  | 2.33165  | -1.18892 | 2.23328  |
| C  | 2.68333  | -0.37389 | 3.31325  |
| C  | 3.09291  | 0.93856  | 3.06453  |
| C  | 3.14995  | 1.44445  | 1.76575  |
| C  | 2.79796  | 0.66542  | 0.63872  |
| C  | 2.35840  | -0.67732 | 0.91651  |
| H  | 2.05605  | -2.23196 | 2.39788  |
| H  | 2.64415  | -0.77015 | 4.33003  |
| H  | 3.38463  | 1.58624  | 3.89527  |
| H  | 3.49496  | 2.46476  | 1.60914  |
| H  | 2.62130  | 0.41914  | -1.32954 |
| N  | 2.89399  | 1.12777  | -0.65723 |
| C  | 2.54922  | 2.49216  | -1.13329 |
| C  | 2.22893  | 2.33113  | -2.62976 |
| H  | 1.35692  | 1.67250  | -2.76860 |
| H  | 1.99530  | 3.30739  | -3.07945 |

|   |         |         |          |
|---|---------|---------|----------|
| H | 3.08783 | 1.90072 | -3.16977 |
| C | 3.74932 | 3.44458 | -0.98185 |
| H | 4.00745 | 3.62229 | 0.07168  |
| H | 4.63559 | 3.02484 | -1.48190 |
| H | 3.51965 | 4.42205 | -1.43486 |
| C | 1.30607 | 3.05152 | -0.41655 |
| H | 0.46222 | 2.35324 | -0.51036 |
| H | 1.48388 | 3.21601 | 0.65504  |
| H | 1.01344 | 4.01364 | -0.86424 |

## D

G= -1898.508974 Hartree

|    |          |          |          |
|----|----------|----------|----------|
| Pd | 0.26621  | -0.38555 | 0.56617  |
| P  | -2.04586 | -0.10905 | -0.09929 |
| C  | -2.19728 | 1.22853  | -1.32270 |
| C  | -2.95855 | 2.36798  | -1.39609 |
| O  | -1.32247 | 1.19213  | -2.37286 |
| C  | -2.52542 | 3.06606  | -2.56978 |
| H  | -3.73090 | 2.66334  | -0.68988 |
| C  | -1.53497 | 2.30147  | -3.12131 |
| H  | -2.90245 | 4.01191  | -2.95320 |
| H  | -0.91105 | 2.41079  | -4.00485 |
| C  | -3.03389 | -1.45866 | -0.76957 |
| C  | -2.71569 | -2.77531 | -0.98743 |
| O  | -4.32193 | -1.22010 | -1.17447 |
| C  | -3.88211 | -3.38163 | -1.55509 |
| H  | -1.75136 | -3.23490 | -0.78089 |
| C  | -4.81929 | -2.38969 | -1.64336 |
| H  | -4.00386 | -4.41801 | -1.86274 |
| H  | -5.84424 | -2.36391 | -2.00652 |
| C  | -3.07474 | 0.53386  | 1.24784  |
| C  | -4.41988 | 0.55344  | 1.51850  |
| O  | -2.39275 | 1.14355  | 2.26756  |
| C  | -4.56792 | 1.21805  | 2.77851  |
| H  | -5.19750 | 0.13865  | 0.88187  |
| C  | -3.30441 | 1.55402  | 3.18084  |
| H  | -5.49263 | 1.41735  | 3.31623  |
| H  | -2.91073 | 2.06170  | 4.05814  |
| I  | 1.23643  | -2.29367 | -0.95238 |
| C  | 2.35150  | -0.83364 | 2.51525  |
| C  | 3.42610  | -0.40430 | 3.30442  |
| C  | 4.28683  | 0.57944  | 2.80676  |
| C  | 4.09004  | 1.12113  | 1.53445  |
| C  | 3.00209  | 0.72671  | 0.72881  |
| C  | 2.10752  | -0.22575 | 1.27834  |
| H  | 1.69284  | -1.62844 | 2.87796  |
| H  | 3.60039  | -0.85391 | 4.28529  |

|   |         |         |          |
|---|---------|---------|----------|
| H | 5.14729 | 0.90250 | 3.39886  |
| H | 4.81110 | 1.83198 | 1.12919  |
| H | 2.25215 | 0.58345 | -1.10686 |
| N | 2.84362 | 1.22420 | -0.58075 |
| C | 2.38469 | 2.61463 | -0.84515 |
| C | 2.17532 | 2.69662 | -2.36485 |
| H | 1.41884 | 1.96411 | -2.69035 |
| H | 1.82319 | 3.69799 | -2.65634 |
| H | 3.11544 | 2.48186 | -2.89543 |
| C | 3.44557 | 3.63992 | -0.41901 |
| H | 3.56165 | 3.67182 | 0.67405  |
| H | 4.42091 | 3.39745 | -0.86812 |
| H | 3.14798 | 4.64751 | -0.74964 |
| C | 1.05652 | 2.91892 | -0.12426 |
| H | 0.26871 | 2.22057 | -0.45209 |
| H | 1.17051 | 2.82469 | 0.96719  |
| H | 0.70645 | 3.93978 | -0.34537 |

### E

G= -2202.696918 Hartree

|    |          |          |          |
|----|----------|----------|----------|
| Pd | 0.10344  | 0.39016  | -0.92213 |
| P  | -1.51857 | 1.86109  | -0.45493 |
| C  | -2.17726 | 2.66535  | -1.94150 |
| C  | -2.70352 | 3.90716  | -2.19263 |
| O  | -2.15002 | 1.93396  | -3.09468 |
| C  | -3.01948 | 3.93363  | -3.58857 |
| H  | -2.83517 | 4.70425  | -1.46475 |
| C  | -2.66212 | 2.70796  | -4.08044 |
| H  | -3.45053 | 4.75774  | -4.15321 |
| H  | -2.70615 | 2.25819  | -5.06937 |
| C  | -2.93812 | 1.05462  | 0.32489  |
| C  | -3.19326 | -0.28600 | 0.48606  |
| O  | -4.01078 | 1.78745  | 0.75757  |
| C  | -4.50178 | -0.37511 | 1.06151  |
| H  | -2.51354 | -1.08551 | 0.19424  |
| C  | -4.94257 | 0.91282  | 1.20322  |
| H  | -5.04857 | -1.27715 | 1.32908  |
| H  | -5.86100 | 1.34721  | 1.59184  |
| C  | -1.25730 | 3.30559  | 0.61032  |
| C  | -1.75524 | 3.66957  | 1.83788  |
| O  | -0.43910 | 4.28887  | 0.13709  |
| C  | -1.20553 | 4.96045  | 2.12551  |
| H  | -2.44942 | 3.09333  | 2.44331  |
| C  | -0.41804 | 5.28301  | 1.05467  |
| H  | -1.37348 | 5.56569  | 3.01367  |
| H  | 0.20583  | 6.14039  | 0.81535  |
| C  | 1.23220  | 2.62686  | -2.56317 |



|    |          |          |          |
|----|----------|----------|----------|
| C  | 2.17448  | 3.60259  | -2.92337 |
| C  | 3.21767  | 3.89175  | -2.04401 |
| C  | 3.32034  | 3.21925  | -0.82104 |
| C  | 2.36960  | 2.25183  | -0.43910 |
| C  | 1.31499  | 1.94791  | -1.34485 |
| H  | 0.41102  | 2.39972  | -3.24797 |
| H  | 2.08708  | 4.12590  | -3.87919 |
| H  | 3.96661  | 4.64552  | -2.30301 |
| H  | 4.15234  | 3.45399  | -0.15788 |
| H  | 1.60744  | 0.98081  | 0.87698  |
| N  | 2.45790  | 1.53271  | 0.77142  |
| C  | 2.85731  | 2.10146  | 2.08642  |
| C  | 2.24410  | 1.17274  | 3.14762  |
| H  | 2.59435  | 0.13448  | 3.03768  |
| H  | 2.51523  | 1.51195  | 4.15855  |
| H  | 1.14292  | 1.17668  | 3.07571  |
| C  | 2.30028  | 3.52020  | 2.29447  |
| H  | 2.67284  | 4.22955  | 1.54284  |
| H  | 1.20392  | 3.50556  | 2.22795  |
| H  | 2.57823  | 3.89896  | 3.29062  |
| C  | 4.38853  | 2.08724  | 2.25121  |
| H  | 4.78173  | 1.06375  | 2.14826  |
| H  | 4.89467  | 2.72667  | 1.51474  |
| H  | 4.66628  | 2.45099  | 3.25289  |
| C  | 0.66670  | -2.08494 | -0.89923 |
| O  | 1.05393  | -3.25642 | -0.75335 |
| O  | -0.52429 | -1.65615 | -0.54339 |
| O  | 1.45833  | -1.13078 | -1.35489 |
| Cs | 4.06735  | -1.46895 | -0.07512 |
| Cs | -0.41012 | -3.68382 | 1.83787  |
| I  | 3.03248  | -2.93964 | 3.41781  |

## F1

G= -3292.314476 Hartree

|    |          |         |          |
|----|----------|---------|----------|
| Pd | 0.45187  | 0.82552 | -0.39469 |
| P  | -1.45019 | 2.18840 | -0.18938 |
| C  | -2.07458 | 2.95336 | -1.71572 |
| C  | -1.59331 | 4.00484 | -2.45211 |
| O  | -3.19207 | 2.44386 | -2.31200 |
| C  | -2.47354 | 4.14539 | -3.57436 |
| H  | -0.71500 | 4.59691 | -2.21247 |
| C  | -3.42252 | 3.17286 | -3.43589 |
| H  | -2.40676 | 4.87725 | -4.37661 |
| H  | -4.29421 | 2.89022 | -4.02140 |
| C  | -2.90386 | 1.40908 | 0.54314  |
| C  | -3.06663 | 0.21132 | 1.19234  |
| O  | -4.07532 | 2.11741 | 0.58371  |

|   |          |          |          |
|---|----------|----------|----------|
| C | -4.42194 | 0.17914  | 1.65516  |
| H | -2.29368 | -0.54580 | 1.27751  |
| C | -4.98098 | 1.36226  | 1.25532  |
| H | -4.92022 | -0.63972 | 2.16865  |
| H | -5.97558 | 1.78950  | 1.36166  |
| C | -1.32803 | 3.64157  | 0.90752  |
| C | -1.74170 | 3.85174  | 2.19975  |
| O | -0.67078 | 4.74105  | 0.45052  |
| C | -1.30033 | 5.16964  | 2.54970  |
| H | -2.29910 | 3.15132  | 2.81738  |
| C | -0.65426 | 5.65715  | 1.44777  |
| H | -1.44601 | 5.68501  | 3.49675  |
| H | -0.15017 | 6.59433  | 1.22718  |
| C | 1.49449  | 2.88517  | -2.18198 |
| C | 2.19808  | 4.01517  | -2.62946 |
| C | 2.80164  | 4.84392  | -1.68329 |
| C | 2.70693  | 4.55893  | -0.31814 |
| C | 2.00645  | 3.42383  | 0.14503  |
| C | 1.39771  | 2.57736  | -0.82488 |
| H | 1.00309  | 2.23764  | -2.91548 |
| H | 2.26678  | 4.23556  | -3.69762 |
| H | 3.35560  | 5.73143  | -2.00208 |
| H | 3.17799  | 5.23372  | 0.39397  |
| H | 1.34793  | 2.23659  | 1.60622  |
| N | 1.85728  | 3.10555  | 1.48589  |
| C | 2.73916  | 3.43388  | 2.62257  |
| C | 2.26562  | 2.53958  | 3.78174  |
| H | 2.37344  | 1.47357  | 3.52518  |
| H | 2.86221  | 2.72836  | 4.68614  |
| H | 1.20669  | 2.73540  | 4.01536  |
| C | 2.57306  | 4.90360  | 3.05915  |
| H | 2.93355  | 5.60907  | 2.29813  |
| H | 1.51298  | 5.12407  | 3.24917  |
| H | 3.14756  | 5.09195  | 3.97998  |
| C | 4.21766  | 3.12560  | 2.31274  |
| H | 4.37744  | 2.06095  | 2.08379  |
| H | 4.57842  | 3.70578  | 1.45145  |
| H | 4.85074  | 3.38029  | 3.17743  |
| C | 2.21126  | -0.53366 | -0.84754 |
| C | 2.19591  | -1.99369 | -0.33995 |
| C | 2.93606  | -0.72991 | 1.36928  |
| C | 2.67062  | 0.23348  | 0.20005  |
| H | 2.28598  | -0.28044 | -1.90727 |
| H | 3.18157  | 1.18908  | 0.12380  |
| C | 1.82107  | -1.77740 | 1.15410  |
| H | 1.97680  | -2.67891 | 1.76464  |
| H | 0.80936  | -1.38316 | 1.28902  |

|    |          |          |          |
|----|----------|----------|----------|
| C  | 3.69478  | -2.33381 | -0.15907 |
| C  | 4.11998  | -1.57727 | 0.86348  |
| H  | 4.28909  | -2.98224 | -0.80246 |
| H  | 1.59928  | -2.69530 | -0.93162 |
| H  | 3.06393  | -0.28581 | 2.36187  |
| S  | 5.73803  | -1.24068 | 1.47715  |
| O  | 5.97835  | 0.18902  | 1.19384  |
| O  | 5.81321  | -1.72677 | 2.86536  |
| C  | 6.82703  | -2.22263 | 0.45430  |
| C  | 7.20415  | -3.49599 | 0.88629  |
| C  | 7.26956  | -1.70307 | -0.76575 |
| C  | 8.03419  | -4.26487 | 0.06909  |
| H  | 6.85447  | -3.86681 | 1.85148  |
| C  | 8.09704  | -2.48722 | -1.56855 |
| H  | 6.96977  | -0.69835 | -1.06966 |
| C  | 8.49244  | -3.77635 | -1.16673 |
| H  | 8.33488  | -5.26295 | 0.39868  |
| H  | 8.44752  | -2.09050 | -2.52517 |
| C  | 9.41612  | -4.59838 | -2.02886 |
| H  | 9.24321  | -4.41057 | -3.09941 |
| H  | 10.46891 | -4.34134 | -1.81864 |
| H  | 9.29715  | -5.67565 | -1.84011 |
| C  | -1.38322 | -1.07525 | -1.41432 |
| O  | -1.96533 | -2.17665 | -1.67740 |
| O  | -1.51743 | -0.02511 | -2.12316 |
| O  | -0.64323 | -1.01058 | -0.31105 |
| Cs | -1.64697 | -3.87510 | 0.63109  |
| Cs | -4.49358 | -0.71520 | -2.29009 |
| I  | -5.49994 | -3.48306 | 0.60997  |

## F2

G= -3292.316948 Hartree

|    |          |          |          |
|----|----------|----------|----------|
| Pd | -0.05087 | 1.75675  | 0.46481  |
| P  | -2.31284 | 2.07315  | 0.22973  |
| C  | -2.89623 | 3.61758  | -0.53717 |
| C  | -2.27162 | 4.56049  | -1.31143 |
| O  | -4.22293 | 3.93244  | -0.41747 |
| C  | -3.27577 | 5.50812  | -1.68863 |
| H  | -1.21892 | 4.57510  | -1.56595 |
| C  | -4.43773 | 5.07289  | -1.11289 |
| H  | -3.14458 | 6.40087  | -2.29658 |
| H  | -5.45478 | 5.45802  | -1.10115 |
| C  | -3.10534 | 0.84239  | -0.84671 |
| C  | -2.62498 | -0.23875 | -1.54284 |
| O  | -4.45029 | 0.97919  | -1.08263 |
| C  | -3.74445 | -0.80782 | -2.23504 |
| H  | -1.60048 | -0.59798 | -1.50084 |

|   |          |          |          |
|---|----------|----------|----------|
| C | -4.82178 | -0.02716 | -1.91830 |
| H | -3.73675 | -1.70720 | -2.84811 |
| H | -5.87307 | -0.05365 | -2.19611 |
| C | -3.31195 | 2.03016  | 1.74844  |
| C | -4.64400 | 1.77433  | 1.95981  |
| O | -2.69003 | 2.24785  | 2.93558  |
| C | -4.83760 | 1.82492  | 3.37968  |
| H | -5.38260 | 1.58410  | 1.18613  |
| C | -3.61305 | 2.11646  | 3.91658  |
| H | -5.76661 | 1.67637  | 3.92699  |
| H | -3.25717 | 2.26591  | 4.93283  |
| C | -0.10797 | 4.14398  | 2.17942  |
| C | 0.14304  | 5.45083  | 2.63035  |
| C | 0.72618  | 6.36126  | 1.75332  |
| C | 1.06329  | 5.97601  | 0.45099  |
| C | 0.82746  | 4.66333  | -0.00871 |
| C | 0.22115  | 3.73227  | 0.88553  |
| H | -0.12718 | 5.74346  | 3.64824  |
| H | 0.92418  | 7.38889  | 2.07094  |
| H | 1.51638  | 6.71462  | -0.20707 |
| H | 0.80288  | 3.30652  | -1.49564 |
| N | 1.17258  | 4.22564  | -1.28511 |
| C | 1.67549  | 4.97468  | -2.44747 |
| C | 1.80332  | 3.94839  | -3.58746 |
| H | 0.83134  | 3.47344  | -3.79945 |
| H | 2.14671  | 4.44000  | -4.50948 |
| H | 2.52529  | 3.15779  | -3.33130 |
| C | 3.07393  | 5.56762  | -2.17375 |
| H | 3.06056  | 6.33848  | -1.39265 |
| H | 3.77040  | 4.77941  | -1.85143 |
| H | 3.47544  | 6.02801  | -3.08987 |
| C | 0.70271  | 6.08746  | -2.89805 |
| H | -0.24215 | 5.65425  | -3.25983 |
| H | 0.46415  | 6.78105  | -2.08020 |
| H | 1.14216  | 6.67075  | -3.72236 |
| C | 2.74918  | 1.98960  | 0.58882  |
| C | 3.54851  | 1.81757  | -0.71497 |
| C | 2.51879  | -0.13519 | -0.31648 |
| C | 2.14849  | 0.80055  | 0.84696  |
| H | 2.80469  | 2.86350  | 1.23584  |
| H | 1.73260  | 0.44720  | 1.79099  |
| C | 2.57742  | 0.87866  | -1.48847 |
| H | 3.01873  | 0.45426  | -2.40160 |
| H | 1.60367  | 1.33125  | -1.71838 |
| C | 4.66143  | 0.77855  | -0.40009 |
| C | 4.02282  | -0.38097 | -0.18776 |
| H | 5.72938  | 0.98610  | -0.33735 |

|    |          |          |          |
|----|----------|----------|----------|
| H  | 3.88334  | 2.74012  | -1.19786 |
| H  | 1.85732  | -0.99051 | -0.42196 |
| S  | 4.55430  | -2.00815 | 0.21597  |
| O  | 3.87465  | -2.37946 | 1.47500  |
| O  | 4.29523  | -2.84954 | -0.97519 |
| C  | 6.31118  | -1.89530 | 0.49006  |
| C  | 7.18299  | -2.04653 | -0.59195 |
| C  | 6.78081  | -1.63371 | 1.78069  |
| C  | 8.55443  | -1.92239 | -0.36914 |
| H  | 6.78805  | -2.26340 | -1.58605 |
| C  | 8.15558  | -1.51541 | 1.98122  |
| H  | 6.07625  | -1.53143 | 2.60804  |
| C  | 9.06217  | -1.65700 | 0.91512  |
| H  | 9.24557  | -2.03794 | -1.20812 |
| H  | 8.53410  | -1.31187 | 2.98629  |
| C  | 10.54732 | -1.56172 | 1.15231  |
| H  | 10.78175 | -0.87711 | 1.98120  |
| H  | 10.95705 | -2.55138 | 1.41929  |
| H  | 11.08079 | -1.21816 | 0.25360  |
| C  | -0.95037 | -0.94969 | 1.16125  |
| O  | -0.80955 | -2.20751 | 1.29634  |
| O  | -1.78419 | -0.26715 | 1.83452  |
| O  | -0.22199 | -0.34385 | 0.22859  |
| Cs | 0.92805  | -3.76430 | -0.36021 |
| Cs | -3.83336 | -2.36180 | 1.52071  |
| I  | -2.79563 | -4.75872 | -1.57488 |
| H  | -0.58475 | 3.43495  | 2.85987  |

### F3

G= -3292.318351 Hartree

|    |          |          |          |
|----|----------|----------|----------|
| Pd | 1.15345  | 0.33985  | 0.12595  |
| P  | -0.35301 | 2.01123  | 0.57329  |
| C  | -1.89052 | 2.03235  | -0.40402 |
| C  | -2.24873 | 2.74299  | -1.52219 |
| O  | -2.93233 | 1.23975  | -0.00980 |
| C  | -3.60094 | 2.37058  | -1.82111 |
| H  | -1.62209 | 3.46283  | -2.04219 |
| C  | -3.96916 | 1.46266  | -0.86737 |
| H  | -4.22726 | 2.74142  | -2.63012 |
| H  | -4.87645 | 0.88497  | -0.69031 |
| C  | -0.94462 | 1.83915  | 2.26608  |
| C  | -0.71310 | 0.85588  | 3.19516  |
| O  | -1.80417 | 2.77538  | 2.78045  |
| C  | -1.47681 | 1.21595  | 4.35298  |
| H  | -0.11221 | -0.03542 | 3.02274  |
| C  | -2.11417 | 2.38769  | 4.03895  |
| H  | -1.53338 | 0.67951  | 5.29813  |

|   |          |          |          |
|---|----------|----------|----------|
| H | -2.78616 | 3.04205  | 4.58999  |
| C | 0.13598  | 3.75371  | 0.49573  |
| C | 0.41945  | 4.67292  | 1.47107  |
| O | 0.34127  | 4.30200  | -0.73783 |
| C | 0.82082  | 5.86531  | 0.78761  |
| H | 0.36358  | 4.50650  | 2.54259  |
| C | 0.75367  | 5.58245  | -0.54648 |
| H | 1.12761  | 6.80788  | 1.23546  |
| H | 0.96011  | 6.15834  | -1.44399 |
| C | 2.60884  | 1.93609  | 2.19469  |
| C | 3.39682  | 2.96836  | 2.72330  |
| C | 4.03522  | 3.83989  | 1.84236  |
| C | 3.90531  | 3.68129  | 0.46045  |
| C | 3.12395  | 2.63995  | -0.08354 |
| C | 2.46040  | 1.76467  | 0.82077  |
| H | 2.11502  | 1.24154  | 2.87553  |
| H | 3.50832  | 3.07806  | 3.80491  |
| H | 4.65074  | 4.65891  | 2.22542  |
| H | 4.42117  | 4.37944  | -0.19581 |
| H | 2.37338  | 1.63123  | -1.64951 |
| N | 2.95131  | 2.43493  | -1.44279 |
| C | 3.66194  | 3.01078  | -2.58818 |
| C | 3.16868  | 2.24503  | -3.82936 |
| H | 2.07285  | 2.32040  | -3.92419 |
| H | 3.62021  | 2.66142  | -4.74188 |
| H | 3.43877  | 1.17936  | -3.77485 |
| C | 5.18876  | 2.81991  | -2.46720 |
| H | 5.60326  | 3.34561  | -1.59745 |
| H | 5.43266  | 1.75347  | -2.34706 |
| H | 5.69662  | 3.19700  | -3.36904 |
| C | 3.30703  | 4.50060  | -2.77705 |
| H | 2.22506  | 4.60568  | -2.94689 |
| H | 3.56654  | 5.10306  | -1.89669 |
| H | 3.84087  | 4.91838  | -3.64543 |
| C | 2.96376  | -3.28425 | -1.97732 |
| C | 1.76901  | -2.35389 | -1.67608 |
| C | 3.60558  | -1.05550 | -1.82770 |
| C | 4.05487  | -2.51342 | -2.07912 |
| H | 2.90184  | -4.37177 | -2.02167 |
| H | 5.08690  | -2.82341 | -2.23739 |
| C | 2.21453  | -1.12822 | -2.51999 |
| H | 1.57903  | -0.24346 | -2.36678 |
| H | 2.29258  | -1.35294 | -3.59291 |
| C | 2.03841  | -1.82268 | -0.26042 |
| C | 3.13626  | -1.00419 | -0.35306 |
| H | 1.60935  | -2.24832 | 0.64849  |
| H | 0.76573  | -2.76010 | -1.82828 |

|    |          |          |          |
|----|----------|----------|----------|
| H  | 4.30038  | -0.26200 | -2.11773 |
| S  | 4.30782  | -0.82042 | 0.98922  |
| O  | 5.19916  | 0.31123  | 0.69434  |
| O  | 3.56498  | -0.94061 | 2.25470  |
| C  | 5.29656  | -2.31417 | 0.82021  |
| C  | 4.79315  | -3.52747 | 1.29988  |
| C  | 6.54448  | -2.24194 | 0.20195  |
| C  | 5.55073  | -4.68421 | 1.13644  |
| H  | 3.82030  | -3.55729 | 1.79435  |
| C  | 7.29351  | -3.41203 | 0.04881  |
| H  | 6.91638  | -1.27836 | -0.15020 |
| C  | 6.81009  | -4.64767 | 0.50660  |
| H  | 5.16252  | -5.63726 | 1.50622  |
| H  | 8.27273  | -3.36208 | -0.43479 |
| C  | 7.62042  | -5.90998 | 0.35691  |
| H  | 8.47441  | -5.76963 | -0.32160 |
| H  | 8.01756  | -6.23474 | 1.33384  |
| H  | 7.00332  | -6.73669 | -0.02961 |
| C  | -0.98462 | -1.70063 | 0.28435  |
| O  | -0.55688 | -1.71761 | 1.47634  |
| O  | -1.92335 | -2.44722 | -0.14914 |
| O  | -0.47291 | -0.82598 | -0.58815 |
| Cs | -3.60672 | -1.51436 | 2.11368  |
| Cs | -2.61037 | -1.38590 | -2.74308 |
| I  | -6.21818 | -1.75969 | -0.89583 |

#### F4

G= -3292.317745 Hartree

|    |          |         |          |
|----|----------|---------|----------|
| Pd | 1.16709  | 0.53435 | -0.04048 |
| P  | -0.41422 | 2.16134 | -0.63539 |
| C  | -0.60610 | 2.56392 | -2.39718 |
| C  | 0.29025  | 3.11590 | -3.27448 |
| O  | -1.79077 | 2.32975 | -3.02855 |
| C  | -0.39036 | 3.21440 | -4.53246 |
| H  | 1.30587  | 3.42211 | -3.03996 |
| C  | -1.64756 | 2.72457 | -4.32208 |
| H  | 0.00741  | 3.60116 | -5.46831 |
| H  | -2.52095 | 2.60564 | -4.95884 |
| C  | -2.05476 | 1.84647 | 0.04361  |
| C  | -2.44876 | 0.97900 | 1.03038  |
| O  | -3.10695 | 2.63789 | -0.32410 |
| C  | -3.83320 | 1.24833 | 1.27941  |
| H  | -1.80728 | 0.22632 | 1.47834  |
| C  | -4.17587 | 2.26381 | 0.43013  |
| H  | -4.49623 | 0.71347 | 1.95503  |
| H  | -5.10544 | 2.79482 | 0.23926  |
| C  | -0.19312 | 3.85670 | 0.02337  |

|   |          |          |          |
|---|----------|----------|----------|
| C | -0.83728 | 4.56188  | 1.00970  |
| O | 0.77227  | 4.63610  | -0.53731 |
| C | -0.21556 | 5.85321  | 1.05145  |
| H | -1.65816 | 4.20140  | 1.62471  |
| C | 0.75652  | 5.83463  | 0.09054  |
| H | -0.45807 | 6.68175  | 1.71345  |
| H | 1.49121  | 6.56015  | -0.24839 |
| C | 3.13795  | 2.43438  | -1.24174 |
| C | 4.04801  | 3.50425  | -1.30162 |
| C | 4.29465  | 4.24093  | -0.14431 |
| C | 3.65528  | 3.92083  | 1.05875  |
| C | 2.73697  | 2.85172  | 1.13177  |
| C | 2.47818  | 2.11292  | -0.05932 |
| H | 2.94945  | 1.83213  | -2.13323 |
| H | 4.55210  | 3.74665  | -2.24072 |
| H | 4.99780  | 5.07870  | -0.16308 |
| H | 3.87365  | 4.51664  | 1.94332  |
| H | 1.37789  | 1.75708  | 2.12999  |
| N | 2.09051  | 2.45886  | 2.29347  |
| C | 2.15277  | 2.98666  | 3.66050  |
| C | 1.20306  | 2.10416  | 4.49131  |
| H | 1.52203  | 1.04959  | 4.47189  |
| H | 1.18516  | 2.43622  | 5.53971  |
| H | 0.17453  | 2.16203  | 4.09837  |
| C | 1.66059  | 4.44565  | 3.74714  |
| H | 2.26058  | 5.12155  | 3.12357  |
| H | 0.62185  | 4.51600  | 3.39667  |
| H | 1.70753  | 4.80648  | 4.78695  |
| C | 3.57651  | 2.86200  | 4.24265  |
| H | 3.90935  | 1.81261  | 4.23295  |
| H | 4.30924  | 3.44857  | 3.67256  |
| H | 3.59639  | 3.21840  | 5.28436  |
| C | 3.94814  | -2.06483 | 2.47736  |
| C | 3.06475  | -0.80075 | 2.39116  |
| C | 2.02984  | -2.41112 | 1.20893  |
| C | 3.32960  | -3.02601 | 1.77784  |
| H | 4.92024  | -2.10650 | 2.96911  |
| H | 3.67684  | -4.03844 | 1.57385  |
| C | 1.67055  | -1.48445 | 2.40284  |
| H | 0.83021  | -0.80949 | 2.19226  |
| H | 1.49016  | -2.04367 | 3.33201  |
| C | 3.15894  | -0.37528 | 0.91446  |
| C | 2.48829  | -1.34009 | 0.19758  |
| H | 3.92688  | 0.29580  | 0.53903  |
| H | 3.26643  | -0.00590 | 3.11424  |
| H | 1.27568  | -3.09578 | 0.81547  |
| S | 2.83393  | -1.82568 | -1.49815 |



|    |          |          |          |
|----|----------|----------|----------|
| O  | 1.84698  | -2.85147 | -1.86718 |
| O  | 3.02770  | -0.61293 | -2.30921 |
| C  | 4.43120  | -2.63050 | -1.34852 |
| C  | 5.58887  | -1.84502 | -1.31055 |
| C  | 4.49442  | -4.02060 | -1.25259 |
| C  | 6.82254  | -2.47176 | -1.15584 |
| H  | 5.51753  | -0.75992 | -1.41002 |
| C  | 5.74190  | -4.63260 | -1.10222 |
| H  | 3.57634  | -4.60851 | -1.30156 |
| C  | 6.92053  | -3.87275 | -1.04667 |
| H  | 7.73244  | -1.86597 | -1.12543 |
| H  | 5.79903  | -5.72184 | -1.02929 |
| C  | 8.26999  | -4.52782 | -0.89855 |
| H  | 8.18191  | -5.59861 | -0.66466 |
| H  | 8.85201  | -4.43314 | -1.83098 |
| H  | 8.86014  | -4.04685 | -0.10206 |
| C  | -1.01558 | -1.09798 | -1.09865 |
| O  | -1.80142 | -2.09076 | -1.21894 |
| O  | -0.96657 | -0.14312 | -1.93689 |
| O  | -0.26772 | -1.02869 | -0.00127 |
| Cs | -1.96461 | -3.33833 | 1.33330  |
| Cs | -3.88287 | -0.37982 | -2.48366 |
| I  | -5.66524 | -2.17443 | 0.87006  |

### G1-ts

G= -3292.296145 Hartree

|    |          |          |          |
|----|----------|----------|----------|
| Pd | 0.55495  | 0.75124  | -0.52104 |
| P  | -1.35790 | 2.16940  | -0.41323 |
| C  | -2.04652 | 2.66271  | -2.02537 |
| C  | -1.44706 | 3.34078  | -3.05321 |
| O  | -3.32942 | 2.34890  | -2.35952 |
| C  | -2.42980 | 3.44148  | -4.09363 |
| H  | -0.42855 | 3.72213  | -3.05355 |
| C  | -3.55016 | 2.82269  | -3.61774 |
| H  | -2.31588 | 3.91597  | -5.06618 |
| H  | -4.54443 | 2.65572  | -4.02534 |
| C  | -2.74063 | 1.53363  | 0.55275  |
| C  | -2.80453 | 0.41630  | 1.34669  |
| O  | -3.91497 | 2.23024  | 0.64681  |
| C  | -4.09801 | 0.42158  | 1.96179  |
| H  | -2.00688 | -0.31664 | 1.42447  |
| C  | -4.72362 | 1.54698  | 1.49848  |
| H  | -4.52250 | -0.34158 | 2.61033  |
| H  | -5.70947 | 1.97376  | 1.66848  |
| C  | -1.19735 | 3.82137  | 0.35358  |
| C  | -1.70268 | 4.39896  | 1.49126  |
| O  | -0.40724 | 4.71765  | -0.30186 |

|   |          |          |          |
|---|----------|----------|----------|
| C | -1.18068 | 5.73470  | 1.52845  |
| H | -2.37529 | 3.92875  | 2.20404  |
| C | -0.40217 | 5.86845  | 0.41334  |
| H | -1.36277 | 6.49333  | 2.28678  |
| H | 0.20072  | 6.67781  | 0.01098  |
| C | 2.12924  | 3.02082  | -1.73289 |
| C | 2.62944  | 4.31668  | -1.82353 |
| C | 2.94085  | 4.99816  | -0.63809 |
| C | 2.70361  | 4.41926  | 0.60478  |
| C | 2.12895  | 3.12987  | 0.71225  |
| C | 1.87967  | 2.39884  | -0.49374 |
| H | 1.95589  | 2.44673  | -2.64878 |
| H | 2.80748  | 4.77754  | -2.79776 |
| H | 3.37360  | 6.00149  | -0.68107 |
| H | 2.93606  | 4.98839  | 1.50211  |
| H | 1.17603  | 1.74541  | 1.79860  |
| N | 1.78829  | 2.54434  | 1.90890  |
| C | 2.05690  | 2.94728  | 3.29835  |
| C | 1.52544  | 1.79904  | 4.17493  |
| H | 2.05321  | 0.85808  | 3.95443  |
| H | 1.67140  | 2.03143  | 5.23988  |
| H | 0.44657  | 1.64428  | 4.00656  |
| C | 1.30267  | 4.23862  | 3.67660  |
| H | 1.62980  | 5.10204  | 3.08239  |
| H | 0.22476  | 4.11297  | 3.50196  |
| H | 1.46422  | 4.47718  | 4.73970  |
| C | 3.56913  | 3.09977  | 3.55290  |
| H | 4.09358  | 2.14953  | 3.37056  |
| H | 4.02612  | 3.86414  | 2.91032  |
| H | 3.74763  | 3.39070  | 4.59954  |
| C | 2.22096  | -0.49699 | -0.90143 |
| C | 2.47639  | -1.57738 | 0.17390  |
| C | 3.64630  | 0.23718  | 0.82800  |
| C | 3.03372  | 0.61575  | -0.53138 |
| H | 2.11081  | -0.80149 | -1.94689 |
| H | 3.68836  | 1.13052  | -1.22918 |
| C | 2.57172  | -0.69499 | 1.44374  |
| H | 2.95103  | -1.23507 | 2.32271  |
| H | 1.62477  | -0.19979 | 1.69004  |
| C | 3.96573  | -1.93932 | 0.01762  |
| C | 4.65000  | -0.85478 | 0.41439  |
| H | 4.36681  | -2.85398 | -0.41921 |
| H | 1.76062  | -2.40515 | 0.17168  |
| H | 4.05212  | 1.05607  | 1.42706  |
| S | 6.35871  | -0.44698 | 0.26083  |
| O | 6.42756  | 0.63394  | -0.74281 |
| O | 6.89799  | -0.21752 | 1.61204  |

|    |          |          |          |
|----|----------|----------|----------|
| C  | 7.10928  | -1.92015 | -0.42322 |
| C  | 7.64412  | -2.87871 | 0.44006  |
| C  | 7.13067  | -2.09201 | -1.81021 |
| C  | 8.20261  | -4.03646 | -0.10374 |
| H  | 7.62448  | -2.70824 | 1.51797  |
| C  | 7.69162  | -3.25590 | -2.33454 |
| H  | 6.71680  | -1.31781 | -2.45892 |
| C  | 8.23549  | -4.24418 | -1.49367 |
| H  | 8.62421  | -4.79288 | 0.56355  |
| H  | 7.71194  | -3.40067 | -3.41804 |
| C  | 8.86998  | -5.48102 | -2.07682 |
| H  | 8.35776  | -5.80161 | -2.99669 |
| H  | 9.92333  | -5.28451 | -2.34218 |
| H  | 8.86154  | -6.31802 | -1.36294 |
| C  | -1.50660 | -1.15214 | -1.34365 |
| O  | -2.11709 | -2.27171 | -1.40263 |
| O  | -1.80855 | -0.15398 | -2.06587 |
| O  | -0.55269 | -1.02780 | -0.42203 |
| Cs | -1.61907 | -3.62301 | 1.07145  |
| Cs | -4.70429 | -0.80295 | -1.86498 |
| I  | -5.49095 | -3.19650 | 1.40534  |

### G2-ts

G= -3292.296216 Hartree

|    |          |          |          |
|----|----------|----------|----------|
| Pd | -0.00462 | 1.33656  | 0.31448  |
| P  | -2.31689 | 1.96281  | 0.16304  |
| C  | -2.79957 | 3.54641  | -0.60273 |
| C  | -2.13006 | 4.38231  | -1.45893 |
| O  | -4.05520 | 4.04345  | -0.37389 |
| C  | -3.02854 | 5.45219  | -1.77335 |
| H  | -1.10959 | 4.24915  | -1.80203 |
| C  | -4.17911 | 5.18949  | -1.08183 |
| H  | -2.83794 | 6.30727  | -2.41879 |
| H  | -5.13032 | 5.70937  | -0.99198 |
| C  | -3.34177 | 0.80672  | -0.78804 |
| C  | -3.01782 | -0.33403 | -1.47858 |
| O  | -4.68230 | 1.06288  | -0.92777 |
| C  | -4.23427 | -0.81268 | -2.06950 |
| H  | -2.03266 | -0.79375 | -1.50370 |
| C  | -5.20783 | 0.07458  | -1.69973 |
| H  | -4.34910 | -1.71995 | -2.65968 |
| H  | -6.27445 | 0.14275  | -1.90214 |
| C  | -3.17396 | 2.09276  | 1.76096  |
| C  | -4.48661 | 1.96628  | 2.13741  |
| O  | -2.40328 | 2.34828  | 2.85258  |
| C  | -4.51250 | 2.14328  | 3.56029  |
| H  | -5.32094 | 1.77879  | 1.46679  |

|   |          |          |          |
|---|----------|----------|----------|
| C | -3.21656 | 2.37140  | 3.93491  |
| H | -5.38043 | 2.11308  | 4.21649  |
| H | -2.73779 | 2.56744  | 4.89109  |
| C | 0.56792  | 3.54830  | 2.11217  |
| C | 0.48050  | 4.84467  | 2.61215  |
| C | 0.65895  | 5.91536  | 1.72705  |
| C | 0.90654  | 5.68688  | 0.37683  |
| C | 0.97608  | 4.37393  | -0.15057 |
| C | 0.77749  | 3.27815  | 0.74466  |
| H | 0.28308  | 5.01827  | 3.67230  |
| H | 0.60435  | 6.94527  | 2.09007  |
| H | 1.02255  | 6.54200  | -0.28539 |
| H | 1.07779  | 3.16099  | -1.75098 |
| N | 1.17478  | 4.13191  | -1.49617 |
| C | 1.73214  | 4.99843  | -2.55286 |
| C | 2.03168  | 4.07199  | -3.74483 |
| H | 1.12162  | 3.54161  | -4.06961 |
| H | 2.40430  | 4.65658  | -4.59854 |
| H | 2.79659  | 3.32370  | -3.48496 |
| C | 3.04838  | 5.66774  | -2.10906 |
| H | 2.91151  | 6.32874  | -1.24326 |
| H | 3.79759  | 4.90870  | -1.83675 |
| H | 3.46055  | 6.27078  | -2.93254 |
| C | 0.71320  | 6.06427  | -3.01260 |
| H | -0.18224 | 5.58622  | -3.43723 |
| H | 0.38811  | 6.71312  | -2.18820 |
| H | 1.15776  | 6.70399  | -3.79085 |
| C | 2.46215  | 1.85630  | 0.68474  |
| C | 3.35378  | 1.96070  | -0.56967 |
| C | 2.45745  | -0.10048 | -0.62877 |
| C | 1.89704  | 0.55522  | 0.64383  |
| H | 2.79147  | 2.33300  | 1.60440  |
| H | 1.76839  | -0.05983 | 1.53810  |
| C | 2.56532  | 1.09944  | -1.59157 |
| H | 3.14971  | 0.87306  | -2.49375 |
| H | 1.58135  | 1.48682  | -1.88235 |
| C | 4.50263  | 0.95673  | -0.26699 |
| C | 3.94870  | -0.26444 | -0.33058 |
| H | 5.52163  | 1.22381  | 0.01198  |
| H | 3.66706  | 2.96855  | -0.85691 |
| H | 1.91509  | -0.97545 | -0.98600 |
| S | 4.51937  | -1.88779 | 0.04230  |
| O | 3.76210  | -2.32199 | 1.23750  |
| O | 4.37770  | -2.69222 | -1.18978 |
| C | 6.24369  | -1.72210 | 0.45769  |
| C | 7.20300  | -1.84359 | -0.55178 |
| C | 6.60117  | -1.45253 | 1.78210  |

|    |          |          |          |
|----|----------|----------|----------|
| C  | 8.54778  | -1.68175 | -0.21992 |
| H  | 6.89398  | -2.06768 | -1.57431 |
| C  | 7.95182  | -1.29393 | 2.09173  |
| H  | 5.83091  | -1.37679 | 2.55175  |
| C  | 8.94391  | -1.40572 | 1.10118  |
| H  | 9.30671  | -1.77534 | -1.00108 |
| H  | 8.24287  | -1.08343 | 3.12412  |
| C  | 10.40288 | -1.26911 | 1.45292  |
| H  | 10.54967 | -0.62665 | 2.33380  |
| H  | 10.83367 | -2.25717 | 1.69113  |
| H  | 10.98398 | -0.85337 | 0.61607  |
| C  | -1.15279 | -1.20545 | 1.14922  |
| O  | -1.04688 | -2.45093 | 1.39691  |
| O  | -1.95980 | -0.43896 | 1.75572  |
| O  | -0.40589 | -0.71725 | 0.15510  |
| Cs | 0.82380  | -3.66558 | -0.43033 |
| Cs | -4.04148 | -2.54793 | 1.49144  |
| I  | -2.89445 | -4.64606 | -1.84025 |
| H  | 0.45629  | 2.70608  | 2.80110  |

### G3-ts

G= -3292.292364 Hartree

|    |          |          |          |
|----|----------|----------|----------|
| Pd | 0.82518  | 0.17198  | -0.00018 |
| P  | -0.56353 | 1.99312  | 0.48680  |
| C  | -2.15099 | 2.19577  | -0.38670 |
| C  | -2.54713 | 3.01962  | -1.40901 |
| O  | -3.17898 | 1.35962  | -0.04584 |
| C  | -3.90910 | 2.67509  | -1.70146 |
| H  | -1.93539 | 3.78738  | -1.87574 |
| C  | -4.24684 | 1.67019  | -0.83970 |
| H  | -4.56143 | 3.12839  | -2.44528 |
| H  | -5.14852 | 1.07550  | -0.68288 |
| C  | -1.07781 | 1.88446  | 2.21595  |
| C  | -0.84223 | 0.91058  | 3.15487  |
| O  | -1.85047 | 2.87828  | 2.76267  |
| C  | -1.50898 | 1.33745  | 4.34992  |
| H  | -0.30937 | -0.02045 | 2.96783  |
| C  | -2.10058 | 2.53545  | 4.04736  |
| H  | -1.53637 | 0.82381  | 5.30896  |
| H  | -2.70210 | 3.23630  | 4.62230  |
| C  | 0.09548  | 3.68469  | 0.42242  |
| C  | 0.47560  | 4.56350  | 1.40182  |
| O  | 0.33630  | 4.23036  | -0.80892 |
| C  | 0.97291  | 5.72572  | 0.72780  |
| H  | 0.40671  | 4.39539  | 2.47252  |
| C  | 0.85843  | 5.46927  | -0.60786 |
| H  | 1.36418  | 6.63358  | 1.18172  |

|   |         |          |          |
|---|---------|----------|----------|
| H | 1.09311 | 6.04152  | -1.50061 |
| C | 2.59111 | 1.39482  | 1.93047  |
| C | 3.21614 | 2.47031  | 2.54822  |
| C | 3.88163 | 3.40964  | 1.75096  |
| C | 3.86142 | 3.31425  | 0.36550  |
| C | 3.17285 | 2.26492  | -0.28785 |
| C | 2.56276 | 1.24731  | 0.52336  |
| H | 2.11759 | 0.63355  | 2.54724  |
| H | 3.20594 | 2.56138  | 3.63626  |
| H | 4.40988 | 4.24670  | 2.21562  |
| H | 4.34866 | 4.08960  | -0.22076 |
| H | 2.29045 | 1.59496  | -1.96083 |
| N | 3.03062 | 2.20732  | -1.65176 |
| C | 3.73581 | 2.91671  | -2.73130 |
| C | 3.34682 | 2.19307  | -4.03366 |
| H | 2.25314 | 2.19739  | -4.17443 |
| H | 3.79924 | 2.69638  | -4.90049 |
| H | 3.69061 | 1.14763  | -4.02513 |
| C | 5.26514 | 2.82976  | -2.56384 |
| H | 5.62089 | 3.33534  | -1.65725 |
| H | 5.59213 | 1.78062  | -2.50828 |
| H | 5.76099 | 3.29865  | -3.42748 |
| C | 3.27756 | 4.38594  | -2.83393 |
| H | 2.19393 | 4.42604  | -3.01889 |
| H | 3.48045 | 4.94482  | -1.91065 |
| H | 3.79336 | 4.89479  | -3.66356 |
| C | 3.20074 | -3.03202 | -1.76049 |
| C | 1.95529 | -2.16595 | -1.53559 |
| C | 3.72333 | -0.76591 | -1.59484 |
| C | 4.25262 | -2.20361 | -1.81234 |
| H | 3.20951 | -4.12141 | -1.80899 |
| H | 5.30420 | -2.45861 | -1.92424 |
| C | 2.38647 | -0.93342 | -2.37317 |
| H | 1.67851 | -0.09404 | -2.29313 |
| H | 2.55763 | -1.16707 | -3.43324 |
| C | 2.06275 | -1.56900 | -0.11287 |
| C | 3.20200 | -0.71183 | -0.12734 |
| H | 1.75150 | -2.13313 | 0.76961  |
| H | 0.97860 | -2.61021 | -1.75155 |
| H | 4.40053 | 0.04603  | -1.86759 |
| S | 4.47319 | -0.82249 | 1.20896  |
| O | 5.39363 | 0.31680  | 1.05767  |
| O | 3.76296 | -1.08884 | 2.47349  |
| C | 5.43185 | -2.30860 | 0.89230  |
| C | 4.89511 | -3.55478 | 1.22979  |
| C | 6.72105 | -2.18997 | 0.37379  |
| C | 5.65692 | -4.69860 | 1.00770  |

|    |          |          |          |
|----|----------|----------|----------|
| H  | 3.89334  | -3.62016 | 1.65678  |
| C  | 7.47395  | -3.34767 | 0.16299  |
| H  | 7.11877  | -1.20137 | 0.13965  |
| C  | 6.95532  | -4.61632 | 0.46856  |
| H  | 5.24132  | -5.67759 | 1.26162  |
| H  | 8.48528  | -3.26274 | -0.24344 |
| C  | 7.77071  | -5.86655 | 0.25865  |
| H  | 8.66595  | -5.67366 | -0.35025 |
| H  | 8.10516  | -6.27858 | 1.22616  |
| H  | 7.17717  | -6.65146 | -0.23653 |
| C  | -1.28594 | -1.80651 | 0.34950  |
| O  | -0.83509 | -1.74035 | 1.52978  |
| O  | -2.27089 | -2.54039 | -0.00194 |
| O  | -0.77204 | -1.01806 | -0.60237 |
| Cs | -3.84623 | -1.29781 | 2.20285  |
| Cs | -3.06784 | -1.38431 | -2.54692 |
| I  | -6.68847 | -1.35424 | -0.64174 |

#### G4-ts

G= -3292.306883 Hartree

|    |          |         |          |
|----|----------|---------|----------|
| Pd | 1.09291  | 0.41080 | -0.14753 |
| P  | -0.39222 | 2.16543 | -0.68929 |
| C  | -0.69480 | 2.46458 | -2.45329 |
| C  | 0.19622  | 2.59283 | -3.48245 |
| O  | -1.97039 | 2.58050 | -2.91604 |
| C  | -0.59009 | 2.79417 | -4.66561 |
| H  | 1.27901  | 2.53296 | -3.40145 |
| C  | -1.89481 | 2.77537 | -4.26282 |
| H  | -0.22804 | 2.93131 | -5.68247 |
| H  | -2.84178 | 2.89810 | -4.78298 |
| C  | -1.98235 | 2.03129 | 0.14870  |
| C  | -2.38831 | 1.13030 | 1.10102  |
| O  | -2.96063 | 2.96639 | -0.04787 |
| C  | -3.69923 | 1.53510 | 1.51275  |
| H  | -1.81473 | 0.26281 | 1.41522  |
| C  | -3.99202 | 2.65383 | 0.78206  |
| H  | -4.34862 | 1.02292 | 2.21839  |
| H  | -4.85943 | 3.30810 | 0.73382  |
| C  | 0.05259  | 3.86714 | -0.18341 |
| C  | -0.48452 | 4.77477 | 0.69431  |
| O  | 1.14329  | 4.41449 | -0.79280 |
| C  | 0.33888  | 5.94615 | 0.61813  |
| H  | -1.36882 | 4.62449 | 1.30749  |
| C  | 1.31010  | 5.66472 | -0.30159 |
| H  | 0.22061  | 6.87350 | 1.17472  |
| H  | 2.15651  | 6.22279 | -0.69252 |
| C  | 3.44387  | 2.14343 | -0.93985 |

|   |          |          |          |
|---|----------|----------|----------|
| C | 4.28269  | 3.25581  | -0.90745 |
| C | 4.35468  | 4.01011  | 0.27187  |
| C | 3.57384  | 3.68964  | 1.38021  |
| C | 2.67984  | 2.59219  | 1.34768  |
| C | 2.65014  | 1.78641  | 0.16453  |
| H | 3.41507  | 1.50029  | -1.82420 |
| H | 4.88439  | 3.52293  | -1.77938 |
| H | 5.02518  | 4.87219  | 0.33019  |
| H | 3.64003  | 4.31567  | 2.26766  |
| H | 1.13323  | 1.57951  | 2.11722  |
| N | 1.83800  | 2.25691  | 2.38287  |
| C | 1.71106  | 2.78881  | 3.74857  |
| C | 0.64382  | 1.91616  | 4.43342  |
| H | 0.96212  | 0.86226  | 4.47169  |
| H | 0.46908  | 2.25931  | 5.46355  |
| H | -0.31411 | 1.97179  | 3.89007  |
| C | 1.22548  | 4.25202  | 3.75642  |
| H | 1.91113  | 4.92035  | 3.21936  |
| H | 0.24537  | 4.32853  | 3.26696  |
| H | 1.13075  | 4.61632  | 4.79147  |
| C | 3.03516  | 2.65107  | 4.52609  |
| H | 3.33457  | 1.59437  | 4.59836  |
| H | 3.85673  | 3.20353  | 4.05032  |
| H | 2.91609  | 3.04066  | 5.54883  |
| C | 4.20534  | -1.81217 | 2.28397  |
| C | 3.35366  | -0.52810 | 2.19909  |
| C | 2.14088  | -2.19445 | 1.28838  |
| C | 3.47902  | -2.80650 | 1.75344  |
| H | 5.23316  | -1.84515 | 2.64595  |
| H | 3.77601  | -3.84459 | 1.60793  |
| C | 1.95219  | -1.15792 | 2.42493  |
| H | 1.10532  | -0.48132 | 2.25073  |
| H | 1.86492  | -1.62225 | 3.41720  |
| C | 3.33898  | -0.24044 | 0.68989  |
| C | 2.47896  | -1.22553 | 0.13237  |
| H | 4.25702  | 0.08941  | 0.21454  |
| H | 3.66451  | 0.30785  | 2.83058  |
| H | 1.32331  | -2.88130 | 1.05965  |
| S | 2.77956  | -1.91267 | -1.49507 |
| O | 1.83821  | -3.03003 | -1.68360 |
| O | 2.84951  | -0.79353 | -2.45693 |
| C | 4.43309  | -2.61505 | -1.41437 |
| C | 5.54319  | -1.78101 | -1.58761 |
| C | 4.58997  | -3.97805 | -1.16006 |
| C | 6.82209  | -2.32372 | -1.47549 |
| H | 5.40221  | -0.72416 | -1.82218 |
| C | 5.87864  | -4.50701 | -1.05719 |



|    |          |          |          |
|----|----------|----------|----------|
| H  | 3.70738  | -4.61025 | -1.05005 |
| C  | 7.01226  | -3.69192 | -1.20594 |
| H  | 7.69316  | -1.67616 | -1.60866 |
| H  | 6.00551  | -5.57480 | -0.85946 |
| C  | 8.40401  | -4.26465 | -1.11704 |
| H  | 8.40843  | -5.25422 | -0.63704 |
| H  | 8.84040  | -4.38080 | -2.12410 |
| H  | 9.07520  | -3.60072 | -0.54985 |
| C  | -1.25517 | -1.06424 | -1.17408 |
| O  | -2.05639 | -2.04944 | -1.24511 |
| O  | -1.30018 | -0.07083 | -1.95973 |
| O  | -0.38048 | -1.05751 | -0.16736 |
| Cs | -1.85727 | -3.36746 | 1.26940  |
| Cs | -4.21916 | -0.14684 | -2.14453 |
| I  | -5.52616 | -1.94122 | 1.45961  |

## H1

G= -3292.334632 Hartree

|    |          |          |          |
|----|----------|----------|----------|
| Pd | 0.10143  | 0.89699  | 0.20833  |
| P  | -1.92240 | 2.14000  | 0.61248  |
| C  | -3.43010 | 1.17541  | 0.30030  |
| C  | -4.03237 | 0.79381  | -0.87085 |
| O  | -4.05723 | 0.57281  | 1.35394  |
| C  | -5.11140 | -0.07799 | -0.50630 |
| H  | -3.73157 | 1.08946  | -1.87377 |
| C  | -5.07954 | -0.17933 | 0.85630  |
| H  | -5.82383 | -0.56165 | -1.17180 |
| H  | -5.66302 | -0.73760 | 1.58884  |
| C  | -2.01788 | 2.60110  | 2.35971  |
| C  | -1.02962 | 2.59428  | 3.31333  |
| O  | -3.15492 | 3.15435  | 2.88139  |
| C  | -1.60008 | 3.17621  | 4.49154  |
| H  | -0.02237 | 2.20839  | 3.17320  |
| C  | -2.89239 | 3.49290  | 4.16514  |
| H  | -1.11376 | 3.34442  | 5.45032  |
| H  | -3.71033 | 3.94840  | 4.71914  |
| C  | -2.31671 | 3.71699  | -0.20646 |
| C  | -3.28843 | 4.16331  | -1.06688 |
| O  | -1.38735 | 4.69900  | -0.01442 |
| C  | -2.92465 | 5.50487  | -1.42046 |
| H  | -4.16098 | 3.60453  | -1.39468 |
| C  | -1.76580 | 5.77433  | -0.74780 |
| H  | -3.46251 | 6.18008  | -2.08273 |
| H  | -1.12011 | 6.64693  | -0.68776 |
| C  | 1.24483  | 2.16667  | -1.40688 |
| C  | 0.80450  | 3.39525  | -1.92087 |
| C  | 1.76637  | 4.35506  | -2.22347 |

|   |          |          |          |
|---|----------|----------|----------|
| C | 3.12755  | 4.06718  | -2.09347 |
| C | 3.59060  | 2.81290  | -1.62567 |
| C | 2.60269  | 1.87004  | -1.19596 |
| H | 0.52211  | 1.29780  | -1.50547 |
| H | -0.25616 | 3.57601  | -2.09280 |
| H | 1.46479  | 5.33336  | -2.60673 |
| H | 3.84470  | 4.82501  | -2.39914 |
| H | 5.11554  | 1.46283  | -1.52534 |
| N | 4.92184  | 2.45818  | -1.57515 |
| C | 6.13019  | 3.28191  | -1.76463 |
| C | 7.32363  | 2.37418  | -1.41338 |
| H | 7.35777  | 1.49100  | -2.06861 |
| H | 8.26544  | 2.93140  | -1.52806 |
| H | 7.25934  | 2.00306  | -0.37940 |
| C | 6.13512  | 4.48099  | -0.79687 |
| H | 5.30181  | 5.17498  | -0.97196 |
| H | 6.06845  | 4.12764  | 0.24371  |
| H | 7.07151  | 5.04901  | -0.90940 |
| C | 6.28418  | 3.74661  | -3.22877 |
| H | 6.29566  | 2.87506  | -3.90155 |
| H | 5.46746  | 4.40810  | -3.54963 |
| H | 7.23051  | 4.29537  | -3.35903 |
| C | 1.81641  | -0.26135 | 0.07303  |
| C | 2.32470  | -0.62947 | 1.50223  |
| C | 3.93806  | 0.74090  | 0.72989  |
| C | 2.99264  | 0.56729  | -0.54091 |
| H | 1.51751  | -1.13950 | -0.51556 |
| H | 3.54694  | -0.03870 | -1.27766 |
| C | 2.95884  | 0.71665  | 1.91442  |
| H | 3.47971  | 0.68185  | 2.88329  |
| H | 2.24482  | 1.55435  | 1.90359  |
| C | 3.57429  | -1.48062 | 1.29937  |
| C | 4.54107  | -0.64404 | 0.88112  |
| H | 3.62304  | -2.56887 | 1.35931  |
| H | 1.54974  | -1.05503 | 2.14687  |
| H | 4.64405  | 1.57395  | 0.67996  |
| S | 6.11134  | -0.97064 | 0.15771  |
| O | 5.99420  | -0.58601 | -1.27325 |
| O | 7.15591  | -0.32305 | 0.97273  |
| C | 6.31647  | -2.74342 | 0.24789  |
| C | 6.96940  | -3.29554 | 1.35150  |
| C | 5.80385  | -3.54606 | -0.77591 |
| C | 7.10045  | -4.68327 | 1.43073  |
| H | 7.37099  | -2.64180 | 2.12776  |
| C | 5.94395  | -4.92938 | -0.67796 |
| H | 5.31052  | -3.08532 | -1.63365 |
| C | 6.59154  | -5.51985 | 0.42315  |

|    |          |          |          |
|----|----------|----------|----------|
| H  | 7.60960  | -5.12475 | 2.29143  |
| H  | 5.54552  | -5.56624 | -1.47242 |
| C  | 6.75661  | -7.01638 | 0.49677  |
| H  | 5.84569  | -7.53676 | 0.16231  |
| H  | 7.57864  | -7.34725 | -0.16124 |
| H  | 6.99287  | -7.35114 | 1.51737  |
| C  | -1.11242 | -1.51120 | 1.22878  |
| O  | -1.48557 | -2.32755 | 2.13705  |
| O  | -0.62990 | -0.33846 | 1.67779  |
| O  | -1.21633 | -1.72391 | -0.00957 |
| Cs | -3.39862 | -3.73773 | 0.36106  |
| Cs | -2.68614 | -0.65422 | 4.17827  |
| I  | -5.82500 | -3.01661 | 3.51121  |

## H2

G= -3292.342244 Hartree

|    |          |          |          |
|----|----------|----------|----------|
| Pd | 0.03271  | 1.36008  | 0.73022  |
| P  | -2.33391 | 1.92730  | 0.41802  |
| C  | -2.66026 | 3.35665  | -0.67709 |
| C  | -1.89020 | 3.89031  | -1.68029 |
| O  | -3.86216 | 4.00808  | -0.63336 |
| C  | -2.67033 | 4.92838  | -2.28552 |
| H  | -0.87882 | 3.58625  | -1.93958 |
| C  | -3.85518 | 4.95373  | -1.60238 |
| H  | -2.38545 | 5.57331  | -3.11385 |
| H  | -4.74979 | 5.56699  | -1.68330 |
| C  | -3.23775 | 0.65564  | -0.51580 |
| C  | -2.81139 | -0.52356 | -1.07249 |
| O  | -4.55283 | 0.86629  | -0.84478 |
| C  | -3.93309 | -1.07652 | -1.77532 |
| H  | -1.81886 | -0.94764 | -0.94738 |
| C  | -4.95929 | -0.18976 | -1.60115 |
| H  | -3.96067 | -2.02990 | -2.29937 |
| H  | -5.99368 | -0.16712 | -1.93686 |
| C  | -3.43329 | 2.27973  | 1.82163  |
| C  | -4.79387 | 2.22130  | 1.99323  |
| O  | -2.84000 | 2.63427  | 2.99576  |
| C  | -5.04173 | 2.55286  | 3.36577  |
| H  | -5.51637 | 1.97815  | 1.21896  |
| C  | -3.81419 | 2.79347  | 3.92079  |
| H  | -6.00416 | 2.61236  | 3.87069  |
| H  | -3.48787 | 3.07977  | 4.91772  |
| C  | 0.96110  | 3.21706  | 1.97614  |
| C  | 0.02114  | 4.18224  | 2.37244  |
| C  | -0.29474 | 5.19757  | 1.47993  |
| C  | 0.30814  | 5.25306  | 0.22213  |
| C  | 1.24930  | 4.29777  | -0.21076 |

|   |          |          |          |
|---|----------|----------|----------|
| C | 1.59447  | 3.23134  | 0.69807  |
| H | -0.44489 | 4.11776  | 3.35537  |
| H | -1.03140 | 5.95926  | 1.74700  |
| H | 0.00792  | 6.04533  | -0.45709 |
| H | 2.45067  | 3.61375  | -1.66872 |
| N | 1.79019  | 4.34800  | -1.48264 |
| C | 2.01791  | 5.52563  | -2.35366 |
| C | 3.02077  | 5.05341  | -3.42191 |
| H | 2.62457  | 4.18614  | -3.97436 |
| H | 3.21838  | 5.85726  | -4.14573 |
| H | 3.98345  | 4.76859  | -2.96614 |
| C | 2.63916  | 6.69970  | -1.57329 |
| H | 1.97043  | 7.07757  | -0.78816 |
| H | 3.57884  | 6.38492  | -1.09288 |
| H | 2.86166  | 7.53374  | -2.25673 |
| C | 0.72572  | 5.96329  | -3.06973 |
| H | 0.29908  | 5.12234  | -3.63713 |
| H | -0.04149 | 6.32140  | -2.37186 |
| H | 0.94375  | 6.78153  | -3.77354 |
| C | 2.72166  | 2.16543  | 0.57957  |
| C | 3.52494  | 1.94122  | -0.75574 |
| C | 2.34110  | 0.03209  | -0.55852 |
| C | 1.97925  | 0.81260  | 0.72669  |
| H | 3.43665  | 2.35693  | 1.39516  |
| H | 2.18257  | 0.23849  | 1.63860  |
| C | 2.49698  | 1.15154  | -1.60966 |
| H | 2.91733  | 0.79182  | -2.56005 |
| H | 1.55659  | 1.68888  | -1.80195 |
| C | 4.52615  | 0.82990  | -0.44022 |
| C | 3.81070  | -0.30384 | -0.35037 |
| H | 5.58752  | 0.96634  | -0.23156 |
| H | 3.99923  | 2.83450  | -1.18157 |
| H | 1.66959  | -0.79580 | -0.80150 |
| S | 4.28539  | -1.92140 | 0.16475  |
| O | 3.65593  | -2.16865 | 1.48234  |
| O | 3.94994  | -2.84978 | -0.93768 |
| C | 6.05673  | -1.85574 | 0.36118  |
| C | 6.87473  | -2.15465 | -0.73226 |
| C | 6.59192  | -1.48375 | 1.59741  |
| C | 8.25785  | -2.07006 | -0.57721 |
| H | 6.42743  | -2.45240 | -1.68225 |
| C | 7.97846  | -1.40498 | 1.73099  |
| H | 5.92861  | -1.26653 | 2.43660  |
| C | 8.83130  | -1.69586 | 0.65159  |
| H | 8.90717  | -2.30203 | -1.42554 |
| H | 8.40776  | -1.11535 | 2.69360  |
| C | 10.32870 | -1.64264 | 0.81342  |

|    |          |          |          |
|----|----------|----------|----------|
| H  | 10.62646 | -0.95998 | 1.62299  |
| H  | 10.72349 | -2.64273 | 1.06335  |
| H  | 10.82374 | -1.32068 | -0.11529 |
| C  | -1.19898 | -1.04015 | 1.78139  |
| O  | -1.18230 | -2.26398 | 2.11822  |
| O  | -2.02550 | -0.19196 | 2.23074  |
| O  | -0.31201 | -0.67213 | 0.84363  |
| Cs | 0.70999  | -3.63596 | 0.36196  |
| Cs | -4.18956 | -2.24713 | 2.03484  |
| I  | -2.96015 | -4.85833 | -0.84343 |
| H  | 1.32469  | 2.51243  | 2.72854  |

### H3

G= -3292.339632 Hartree

|    |          |          |          |
|----|----------|----------|----------|
| Pd | -0.03268 | 1.22583  | -0.90776 |
| P  | -1.56688 | 2.46170  | 0.45489  |
| C  | -0.77713 | 3.54189  | 1.68407  |
| C  | -1.01423 | 3.84207  | 3.00156  |
| O  | 0.37752  | 4.15112  | 1.27677  |
| C  | 0.06282  | 4.68808  | 3.42292  |
| H  | -1.85476 | 3.48816  | 3.59387  |
| C  | 0.87336  | 4.84045  | 2.33153  |
| H  | 0.21332  | 5.12504  | 4.40797  |
| H  | 1.79594  | 5.38829  | 2.15539  |
| C  | -2.62670 | 3.62912  | -0.44320 |
| C  | -2.55481 | 4.98322  | -0.64616 |
| O  | -3.59153 | 3.09365  | -1.24583 |
| C  | -3.53983 | 5.29207  | -1.64241 |
| H  | -1.86788 | 5.66804  | -0.15412 |
| C  | -4.13203 | 4.10637  | -1.97204 |
| H  | -3.76993 | 6.26889  | -2.06241 |
| H  | -4.90987 | 3.82908  | -2.67868 |
| C  | -2.78993 | 1.54071  | 1.42661  |
| C  | -3.97055 | 1.87939  | 2.04526  |
| O  | -2.60995 | 0.18447  | 1.51547  |
| C  | -4.53290 | 0.66128  | 2.54650  |
| H  | -4.38513 | 2.88344  | 2.11604  |
| C  | -3.66042 | -0.33517 | 2.19337  |
| H  | -5.46692 | 0.53599  | 3.09053  |
| H  | -3.67788 | -1.41906 | 2.29365  |
| C  | 1.11723  | 0.01229  | 0.67187  |
| C  | 0.70464  | 0.43846  | 1.94658  |
| C  | 1.50964  | 1.32780  | 2.64741  |
| C  | 2.75070  | 1.69577  | 2.13256  |
| C  | 3.23280  | 1.22447  | 0.89030  |
| C  | 2.34805  | 0.42964  | 0.08606  |
| H  | 0.56629  | -0.80309 | 0.20449  |

|   |          |          |          |
|---|----------|----------|----------|
| H | -0.24341 | 0.08093  | 2.34773  |
| H | 1.19321  | 1.72236  | 3.61486  |
| H | 3.38759  | 2.33370  | 2.73874  |
| H | 4.93583  | 0.71256  | -0.04899 |
| N | 4.52162  | 1.47533  | 0.46655  |
| C | 5.51211  | 2.45107  | 0.94900  |
| C | 6.65340  | 2.41052  | -0.08506 |
| H | 6.28613  | 2.69050  | -1.08438 |
| H | 7.45685  | 3.10652  | 0.19753  |
| H | 7.08955  | 1.39918  | -0.14560 |
| C | 6.09327  | 2.07179  | 2.32897  |
| H | 5.33752  | 2.09904  | 3.12578  |
| H | 6.50722  | 1.05265  | 2.29624  |
| H | 6.90106  | 2.76556  | 2.61052  |
| C | 4.91360  | 3.86875  | 0.96024  |
| H | 4.51778  | 4.12057  | -0.03544 |
| H | 4.09442  | 3.97711  | 1.68396  |
| H | 5.69167  | 4.60105  | 1.22443  |
| C | 2.56170  | 0.46293  | -4.26784 |
| C | 1.78194  | 1.30189  | -3.27199 |
| C | 3.69304  | 0.68614  | -2.25889 |
| C | 3.69416  | 0.08046  | -3.66068 |
| H | 2.19211  | 0.14675  | -5.24514 |
| H | 4.45081  | -0.60868 | -4.03137 |
| C | 2.94498  | 2.00964  | -2.53819 |
| H | 2.64013  | 2.55228  | -1.63112 |
| H | 3.52539  | 2.67522  | -3.19330 |
| C | 1.29224  | 0.30805  | -2.17724 |
| C | 2.58519  | -0.03544 | -1.37201 |
| H | 0.75250  | -0.55068 | -2.59512 |
| H | 0.96835  | 1.91561  | -3.67202 |
| H | 4.68421  | 0.75789  | -1.81283 |
| S | 2.92387  | -1.88563 | -1.28739 |
| O | 1.79573  | -2.54560 | -0.57642 |
| O | 3.30193  | -2.43401 | -2.60329 |
| C | 4.35994  | -1.93818 | -0.21252 |
| C | 5.63136  | -1.81483 | -0.78513 |
| C | 4.18967  | -1.98448 | 1.17315  |
| C | 6.74171  | -1.70855 | 0.05209  |
| H | 5.73921  | -1.80151 | -1.87120 |
| C | 5.31355  | -1.87777 | 1.99450  |
| H | 3.18910  | -2.08603 | 1.59544  |
| C | 6.60064  | -1.72895 | 1.45220  |
| H | 7.73751  | -1.60637 | -0.38754 |
| H | 5.18540  | -1.89927 | 3.07955  |
| C | 7.81230  | -1.60986 | 2.34021  |
| H | 7.53483  | -1.38029 | 3.37910  |

|    |          |          |          |
|----|----------|----------|----------|
| H  | 8.38389  | -2.55362 | 2.34659  |
| H  | 8.49342  | -0.82229 | 1.98145  |
| C  | -2.07343 | 0.72553  | -2.81874 |
| O  | -2.96475 | 0.97382  | -3.66866 |
| O  | -1.16052 | 1.66435  | -2.57074 |
| O  | -2.02618 | -0.36464 | -2.13245 |
| Cs | -1.08543 | -3.03258 | -1.75541 |
| Cs | -4.92481 | -0.01975 | -1.57788 |
| I  | -4.46189 | -3.60553 | 0.18221  |

#### H4

G= -3292.357158 Hartree

|    |          |          |          |
|----|----------|----------|----------|
| Pd | -1.19228 | 0.92409  | -0.53464 |
| P  | 0.44903  | 1.64253  | 1.06759  |
| C  | 1.50235  | 0.35999  | 1.80916  |
| C  | 1.32740  | -0.46764 | 2.89371  |
| O  | 2.60955  | -0.03466 | 1.11832  |
| C  | 2.39753  | -1.42047 | 2.85383  |
| H  | 0.52895  | -0.40820 | 3.62864  |
| C  | 3.14325  | -1.11264 | 1.74977  |
| H  | 2.58096  | -2.23499 | 3.55116  |
| H  | 4.01393  | -1.55726 | 1.26853  |
| C  | 1.60247  | 2.93617  | 0.54410  |
| C  | 1.52836  | 3.83597  | -0.49048 |
| O  | 2.66324  | 3.24811  | 1.35634  |
| C  | 2.61168  | 4.75464  | -0.29956 |
| H  | 0.79688  | 3.80217  | -1.29477 |
| C  | 3.26172  | 4.34788  | 0.83454  |
| H  | 2.87097  | 5.60586  | -0.92589 |
| H  | 4.13050  | 4.72168  | 1.37211  |
| C  | -0.28736 | 2.37340  | 2.56126  |
| C  | 0.07258  | 2.48784  | 3.88199  |
| O  | -1.48978 | 2.99199  | 2.36304  |
| C  | -0.98359 | 3.20743  | 4.52740  |
| H  | 0.98590  | 2.10296  | 4.32887  |
| C  | -1.90144 | 3.48612  | 3.55111  |
| H  | -1.05043 | 3.48214  | 5.57809  |
| H  | -2.85827 | 4.00217  | 3.55061  |
| C  | -2.80793 | 0.10022  | 0.99533  |
| C  | -2.69442 | 0.13842  | 2.39154  |
| C  | -3.84279 | 0.38629  | 3.13486  |
| C  | -5.08103 | 0.52067  | 2.50111  |
| C  | -5.21550 | 0.43257  | 1.09623  |
| C  | -4.02344 | 0.28663  | 0.31833  |
| H  | -1.96681 | -0.41555 | 0.45102  |
| H  | -1.73118 | -0.03069 | 2.87088  |
| H  | -3.79216 | 0.44598  | 4.22465  |

|   |          |          |          |
|---|----------|----------|----------|
| H | -5.96293 | 0.66494  | 3.12019  |
| H | -6.39635 | 0.13241  | -0.51138 |
| N | -6.42964 | 0.47121  | 0.44012  |
| C | -7.79976 | 0.57472  | 0.97147  |
| C | -8.72006 | 0.55764  | -0.26236 |
| H | -8.60644 | -0.38367 | -0.82542 |
| H | -9.77322 | 0.64138  | 0.04276  |
| H | -8.48754 | 1.39759  | -0.93602 |
| C | -8.00612 | 1.91181  | 1.70941  |
| H | -7.37691 | 2.00334  | 2.60458  |
| H | -7.76814 | 2.75457  | 1.04248  |
| H | -9.05520 | 2.00642  | 2.02973  |
| C | -8.16186 | -0.62350 | 1.87397  |
| H | -8.03707 | -1.56744 | 1.32071  |
| H | -7.53120 | -0.67564 | 2.77178  |
| H | -9.21046 | -0.55229 | 2.20309  |
| C | -2.66881 | 0.27850  | -1.89697 |
| C | -2.82406 | 1.32374  | -3.05144 |
| C | -4.73869 | 1.55905  | -1.88887 |
| C | -4.06931 | 0.27719  | -1.19382 |
| H | -4.65013 | -0.60485 | -1.51919 |
| C | -3.52058 | 2.43337  | -2.23086 |
| H | -3.79034 | 3.30344  | -2.84764 |
| H | -2.94291 | 2.76786  | -1.35516 |
| C | -3.97510 | 0.90126  | -3.96028 |
| C | -5.11895 | 1.07278  | -3.27946 |
| H | -3.84907 | 0.44369  | -4.94218 |
| H | -1.87080 | 1.56765  | -3.52584 |
| H | -5.52972 | 2.02340  | -1.29122 |
| S | -2.23423 | -1.35756 | -2.57683 |
| O | -3.44065 | -2.03728 | -3.10579 |
| O | -1.09327 | -1.16507 | -3.51172 |
| C | -1.64701 | -2.35258 | -1.19467 |
| C | -0.33665 | -2.19592 | -0.72241 |
| C | -2.53795 | -3.23263 | -0.57773 |
| C | 0.06982  | -2.93108 | 0.38934  |
| H | 0.34335  | -1.46351 | -1.16933 |
| C | -2.11250 | -3.95532 | 0.54090  |
| H | -3.54995 | -3.34224 | -0.97037 |
| C | -0.80884 | -3.81501 | 1.04273  |
| H | 1.08739  | -2.80163 | 0.76487  |
| H | -2.80992 | -4.63844 | 1.03311  |
| C | -0.33978 | -4.59198 | 2.24619  |
| H | -1.17262 | -5.08930 | 2.76459  |
| H | 0.38656  | -5.36765 | 1.94985  |
| H | 0.17370  | -3.93244 | 2.96417  |
| C | 1.03193  | 1.21636  | -2.31147 |



|    |          |          |          |
|----|----------|----------|----------|
| O  | 1.69527  | 1.66880  | -3.28578 |
| O  | -0.14841 | 1.77607  | -2.05028 |
| O  | 1.44412  | 0.27073  | -1.55638 |
| Cs | 1.77253  | -1.48369 | -4.09429 |
| Cs | 4.25348  | 1.29598  | -1.43902 |
| I  | 4.93184  | -2.48028 | -1.68528 |
| H  | -6.12456 | 0.77859  | -3.58761 |

**II-ts**

G= -3292.305333 Hartree

|    |          |         |          |
|----|----------|---------|----------|
| Pd | 0.33692  | 0.90500 | 1.02609  |
| P  | -1.61389 | 2.21111 | 1.43955  |
| C  | -2.95842 | 2.20760 | 0.21366  |
| C  | -3.42503 | 3.15100 | -0.66548 |
| O  | -3.61362 | 1.02392 | 0.00473  |
| C  | -4.43310 | 2.50486 | -1.45561 |
| H  | -3.08545 | 4.18151 | -0.73215 |
| C  | -4.51486 | 1.21882 | -1.00290 |
| H  | -5.03427 | 2.94647 | -2.24776 |
| H  | -5.14348 | 0.36137 | -1.25231 |
| C  | -2.49131 | 1.71709 | 2.94871  |
| C  | -2.13123 | 0.80705 | 3.91232  |
| O  | -3.70466 | 2.26397 | 3.26782  |
| C  | -3.18771 | 0.80139 | 4.88172  |
| H  | -1.22035 | 0.21128 | 3.90711  |
| C  | -4.11295 | 1.70511 | 4.43266  |
| H  | -3.24987 | 0.20890 | 5.79239  |
| H  | -5.07130 | 2.04448 | 4.81959  |
| C  | -1.36003 | 3.99315 | 1.65229  |
| C  | -2.16941 | 5.04300 | 2.01300  |
| O  | -0.08560 | 4.44866 | 1.45091  |
| C  | -1.33971 | 6.20784 | 2.02556  |
| H  | -3.23053 | 4.97343 | 2.24235  |
| C  | -0.08671 | 5.78057 | 1.67447  |
| H  | -1.63331 | 7.22812 | 2.26385  |
| H  | 0.86546  | 6.28973 | 1.54537  |
| C  | 0.83917  | 1.45213 | -1.10337 |
| C  | 0.14933  | 2.43346 | -1.84842 |
| C  | 0.84385  | 3.21068 | -2.77352 |
| C  | 2.20964  | 3.00673 | -3.00217 |
| C  | 2.93972  | 2.03274 | -2.28297 |
| C  | 2.23483  | 1.30596 | -1.27702 |
| H  | 0.13430  | 0.30803 | -0.96154 |
| H  | -0.92777 | 2.56149 | -1.71903 |
| H  | 0.32005  | 3.97501 | -3.35608 |
| H  | 2.70347  | 3.59766 | -3.77146 |
| H  | 4.61275  | 0.86679 | -2.14296 |

|   |          |          |          |
|---|----------|----------|----------|
| N | 4.27370  | 1.74630  | -2.51527 |
| C | 5.32285  | 2.58106  | -3.12480 |
| C | 6.66427  | 1.90650  | -2.78407 |
| H | 6.69891  | 0.87664  | -3.17095 |
| H | 7.49583  | 2.47397  | -3.22822 |
| H | 6.82590  | 1.84725  | -1.69705 |
| C | 5.32089  | 3.99777  | -2.51837 |
| H | 4.37927  | 4.53295  | -2.70311 |
| H | 5.46899  | 3.94387  | -1.42850 |
| H | 6.13881  | 4.59612  | -2.94916 |
| C | 5.18162  | 2.64204  | -4.66098 |
| H | 5.18800  | 1.62419  | -5.08069 |
| H | 4.24742  | 3.12913  | -4.97404 |
| H | 6.01811  | 3.20577  | -5.10459 |
| C | 2.04435  | -0.20208 | 0.77148  |
| C | 2.87054  | 0.03827  | 2.07374  |
| C | 4.12940  | 1.00966  | 0.47728  |
| C | 2.95316  | 0.34965  | -0.36490 |
| H | 1.71024  | -1.23854 | 0.63646  |
| H | 3.38927  | -0.47663 | -0.95100 |
| C | 3.43739  | 1.44763  | 1.77831  |
| H | 4.15064  | 1.80080  | 2.53810  |
| H | 2.65876  | 2.20985  | 1.61376  |
| C | 4.12670  | -0.81706 | 1.91622  |
| C | 4.88464  | -0.20099 | 0.99176  |
| H | 4.29270  | -1.79757 | 2.36394  |
| H | 2.31498  | -0.11634 | 3.00955  |
| H | 4.71932  | 1.76137  | -0.05417 |
| S | 6.29259  | -0.76264 | 0.09213  |
| O | 5.84603  | -0.91293 | -1.31489 |
| O | 7.42509  | 0.13602  | 0.38060  |
| C | 6.65716  | -2.38533 | 0.74627  |
| C | 7.56923  | -2.50450 | 1.79726  |
| C | 6.01356  | -3.50230 | 0.20581  |
| C | 7.83087  | -3.77191 | 2.31967  |
| H | 8.06650  | -1.61474 | 2.18767  |
| C | 6.28869  | -4.75998 | 0.74135  |
| H | 5.31511  | -3.37994 | -0.62399 |
| C | 7.19862  | -4.91599 | 1.80285  |
| H | 8.54270  | -3.87556 | 3.14290  |
| H | 5.79001  | -5.63995 | 0.32638  |
| C | 7.51306  | -6.28595 | 2.34749  |
| H | 6.63622  | -6.94960 | 2.30241  |
| H | 8.31303  | -6.76170 | 1.75386  |
| H | 7.86145  | -6.23904 | 3.38997  |
| C | -1.05423 | -1.48865 | -0.15198 |
| O | -1.80346 | -2.48653 | -0.36366 |

|    |          |          |          |
|----|----------|----------|----------|
| O  | -0.83601 | -1.07998 | 1.06167  |
| O  | -0.54993 | -0.84399 | -1.17968 |
| Cs | -2.62337 | -1.69815 | -3.14432 |
| Cs | -3.79685 | -1.85457 | 1.74604  |
| I  | -6.19269 | -2.33549 | -1.39899 |

**I2-ts**

G= -3292.294386 Hartree

|    |          |          |          |
|----|----------|----------|----------|
| Pd | -0.41519 | 0.91002  | 1.14853  |
| P  | 1.75218  | 1.62584  | 1.87423  |
| C  | 1.84266  | 3.17072  | 2.80856  |
| C  | 0.85708  | 4.09905  | 3.04005  |
| O  | 3.01464  | 3.59313  | 3.37103  |
| C  | 1.46506  | 5.15216  | 3.79566  |
| H  | -0.17098 | 4.02964  | 2.68982  |
| C  | 2.77287  | 4.78535  | 3.96343  |
| H  | 0.99438  | 6.06166  | 4.16291  |
| H  | 3.61782  | 5.25296  | 4.46412  |
| C  | 2.49221  | 0.36573  | 2.94677  |
| C  | 1.90400  | -0.73597 | 3.52236  |
| O  | 3.80575  | 0.42616  | 3.32186  |
| C  | 2.92251  | -1.38567 | 4.29294  |
| H  | 0.86740  | -1.04282 | 3.39439  |
| C  | 4.05445  | -0.63244 | 4.12591  |
| H  | 2.82539  | -2.28748 | 4.89419  |
| H  | 5.07143  | -0.72223 | 4.50124  |
| C  | 3.07334  | 1.84790  | 0.64181  |
| C  | 4.14888  | 1.09305  | 0.25128  |
| O  | 2.99385  | 2.97259  | -0.13343 |
| C  | 4.77285  | 1.80728  | -0.82603 |
| H  | 4.47801  | 0.14514  | 0.66598  |
| C  | 4.03085  | 2.94044  | -1.01349 |
| H  | 5.66081  | 1.49199  | -1.37002 |
| H  | 4.11250  | 3.79090  | -1.68635 |
| C  | -1.04470 | 2.30558  | -0.48688 |
| C  | -0.35791 | 3.51475  | -0.73723 |
| C  | -1.05840 | 4.61650  | -1.22031 |
| C  | -2.42326 | 4.52165  | -1.51260 |
| C  | -3.14416 | 3.32880  | -1.28663 |
| C  | -2.44833 | 2.24222  | -0.68072 |
| H  | 0.71988  | 3.57138  | -0.57670 |
| H  | -0.54207 | 5.56288  | -1.40703 |
| H  | -2.92201 | 5.38892  | -1.93824 |
| H  | -4.74849 | 2.19244  | -1.70787 |
| N  | -4.48962 | 3.16580  | -1.60905 |
| C  | -5.37022 | 4.04631  | -2.39794 |
| C  | -6.70152 | 3.28363  | -2.52773 |

|    |          |          |          |
|----|----------|----------|----------|
| H  | -7.13080 | 3.07504  | -1.53495 |
| H  | -7.43027 | 3.87354  | -3.10283 |
| H  | -6.55779 | 2.32469  | -3.05386 |
| C  | -4.81480 | 4.31416  | -3.81288 |
| H  | -3.85036 | 4.83910  | -3.78707 |
| H  | -4.66340 | 3.36352  | -4.34851 |
| H  | -5.51974 | 4.92914  | -4.39451 |
| C  | -5.64795 | 5.36512  | -1.65077 |
| H  | -6.03751 | 5.15519  | -0.64292 |
| H  | -4.75147 | 5.98918  | -1.54131 |
| H  | -6.39760 | 5.95680  | -2.19888 |
| C  | -3.14258 | 0.96955  | -0.24365 |
| C  | -4.37236 | 1.17779  | 0.75177  |
| C  | -2.95963 | -0.08528 | 1.97330  |
| C  | -2.19928 | 0.08322  | 0.62975  |
| H  | -3.49813 | 0.40705  | -1.12825 |
| H  | -1.92623 | -0.87833 | 0.18096  |
| C  | -3.66216 | 1.28109  | 2.11524  |
| H  | -4.36550 | 1.31882  | 2.96036  |
| H  | -2.96006 | 2.12645  | 2.17436  |
| C  | -5.00454 | -0.20223 | 0.85761  |
| C  | -4.15659 | -0.94701 | 1.58758  |
| H  | -5.88768 | -0.54744 | 0.31861  |
| H  | -5.04384 | 1.99776  | 0.47952  |
| H  | -2.36637 | -0.46219 | 2.81743  |
| S  | -4.12308 | -2.69308 | 1.86111  |
| O  | -2.80335 | -3.16325 | 1.39181  |
| O  | -4.52984 | -2.95904 | 3.25208  |
| C  | -5.38136 | -3.34173 | 0.76326  |
| C  | -6.67932 | -3.52448 | 1.24232  |
| C  | -5.04307 | -3.63502 | -0.56159 |
| C  | -7.65876 | -4.00304 | 0.36876  |
| H  | -6.90793 | -3.29882 | 2.28552  |
| C  | -6.03365 | -4.11234 | -1.41789 |
| H  | -4.01650 | -3.49153 | -0.90451 |
| C  | -7.35415 | -4.30340 | -0.96925 |
| H  | -8.67843 | -4.14937 | 0.73482  |
| H  | -5.77945 | -4.34574 | -2.45549 |
| C  | -8.40413 | -4.84713 | -1.90467 |
| H  | -8.33195 | -4.38357 | -2.90107 |
| H  | -8.27248 | -5.93398 | -2.04417 |
| H  | -9.42051 | -4.68234 | -1.51808 |
| C  | 0.61553  | -0.86232 | -1.06709 |
| O  | 1.11260  | -1.80385 | -1.75319 |
| O  | 0.25893  | 0.24963  | -1.66229 |
| O  | 0.51803  | -0.98404 | 0.22423  |
| Cs | 2.51829  | -3.15927 | 0.54242  |

|    |          |          |          |
|----|----------|----------|----------|
| Cs | 2.69691  | -0.01917 | -3.49287 |
| I  | 5.64672  | -2.02204 | -1.60433 |
| H  | -0.37063 | 1.22962  | -0.90030 |

### I3-ts

G= -3292.304100 Hartree

|    |          |          |          |
|----|----------|----------|----------|
| Pd | -0.22023 | 1.62358  | -0.96659 |
| P  | -2.00214 | 2.89525  | -0.03001 |
| C  | -1.47650 | 4.05651  | 1.26256  |
| C  | -1.99807 | 4.43653  | 2.47425  |
| O  | -0.23589 | 4.60748  | 1.10555  |
| C  | -1.01416 | 5.27463  | 3.09168  |
| H  | -2.96350 | 4.13510  | 2.87438  |
| C  | 0.03158  | 5.33851  | 2.21179  |
| H  | -1.07350 | 5.75837  | 4.06445  |
| H  | 0.99578  | 5.84052  | 2.23382  |
| C  | -2.96750 | 3.96740  | -1.13417 |
| C  | -3.43734 | 5.25379  | -1.04141 |
| O  | -3.29141 | 3.44775  | -2.35732 |
| C  | -4.09508 | 5.53365  | -2.28334 |
| H  | -3.32024 | 5.91254  | -0.18381 |
| C  | -3.97491 | 4.39970  | -3.03826 |
| H  | -4.58877 | 6.45778  | -2.57692 |
| H  | -4.30409 | 4.13095  | -4.03930 |
| C  | -3.32893 | 1.98758  | 0.81761  |
| C  | -4.66497 | 2.23386  | 1.02946  |
| O  | -2.99120 | 0.79626  | 1.39547  |
| C  | -5.16362 | 1.12684  | 1.79233  |
| H  | -5.21336 | 3.10675  | 0.68086  |
| C  | -4.09802 | 0.28739  | 1.98978  |
| H  | -6.18032 | 0.96894  | 2.14668  |
| H  | -3.98572 | -0.69162 | 2.45580  |
| C  | 0.82963  | 0.89209  | 0.85065  |
| C  | 0.34735  | 1.34312  | 2.09399  |
| C  | 1.23748  | 1.81062  | 3.05660  |
| C  | 2.60966  | 1.80071  | 2.80769  |
| C  | 3.14741  | 1.33661  | 1.58603  |
| C  | 2.22682  | 0.92393  | 0.57583  |
| H  | 0.11255  | -0.10123 | 0.27624  |
| H  | -0.72209 | 1.30022  | 2.30555  |
| H  | 0.87329  | 2.16479  | 4.02513  |
| H  | 3.28643  | 2.11750  | 3.59834  |
| H  | 4.80294  | 0.74486  | 0.58425  |
| N  | 4.52232  | 1.23988  | 1.41382  |
| C  | 5.58280  | 2.13550  | 1.92447  |
| C  | 6.80111  | 1.91546  | 1.00813  |
| H  | 6.58606  | 2.22958  | -0.02619 |

|    |          |          |          |
|----|----------|----------|----------|
| H  | 7.65963  | 2.50315  | 1.36489  |
| H  | 7.09596  | 0.85401  | 0.99359  |
| C  | 5.98980  | 1.75761  | 3.36367  |
| H  | 5.17400  | 1.91496  | 4.08221  |
| H  | 6.27764  | 0.69589  | 3.40856  |
| H  | 6.84633  | 2.36638  | 3.69446  |
| C  | 5.16105  | 3.61441  | 1.84211  |
| H  | 4.88866  | 3.87588  | 0.80754  |
| H  | 4.29511  | 3.83345  | 2.48182  |
| H  | 5.99054  | 4.26511  | 2.16003  |
| C  | 2.87523  | 0.73869  | -3.70746 |
| C  | 1.92689  | 1.59947  | -2.88544 |
| C  | 3.73623  | 1.20261  | -1.60948 |
| C  | 3.95710  | 0.50978  | -2.94950 |
| H  | 2.64260  | 0.31369  | -4.68500 |
| H  | 4.81980  | -0.10656 | -3.19228 |
| C  | 2.93838  | 2.44315  | -2.07852 |
| H  | 2.48829  | 3.01737  | -1.25486 |
| H  | 3.54985  | 3.10610  | -2.70844 |
| C  | 1.37593  | 0.64726  | -1.78627 |
| C  | 2.58745  | 0.44503  | -0.81568 |
| H  | 0.96890  | -0.28501 | -2.18749 |
| H  | 1.15226  | 2.12905  | -3.45870 |
| H  | 4.64566  | 1.41129  | -1.04595 |
| S  | 2.91257  | -1.47910 | -0.64419 |
| O  | 2.46524  | -1.89276 | 0.70937  |
| O  | 2.34890  | -2.18141 | -1.82215 |
| C  | 4.69222  | -1.81423 | -0.65868 |
| C  | 5.29718  | -2.28653 | -1.82815 |
| C  | 5.41438  | -1.72167 | 0.53326  |
| C  | 6.65388  | -2.60647 | -1.81092 |
| H  | 4.69685  | -2.41429 | -2.72984 |
| C  | 6.77497  | -2.03977 | 0.53152  |
| H  | 4.91734  | -1.40877 | 1.45188  |
| C  | 7.41897  | -2.47604 | -0.63719 |
| H  | 7.12903  | -2.97568 | -2.72407 |
| H  | 7.34220  | -1.96067 | 1.46286  |
| C  | 8.88894  | -2.80980 | -0.64656 |
| H  | 9.32652  | -2.75808 | 0.36085  |
| H  | 9.06284  | -3.82256 | -1.04496 |
| H  | 9.44445  | -2.11072 | -1.29419 |
| C  | -1.21113 | -1.21281 | -1.21139 |
| O  | -1.67459 | -2.30746 | -1.63621 |
| O  | -1.51048 | -0.09290 | -1.79893 |
| O  | -0.45975 | -1.21382 | -0.13598 |
| Cs | -0.10355 | -3.98262 | 0.44581  |
| Cs | -4.40869 | -1.20055 | -1.38951 |

|   |          |          |         |
|---|----------|----------|---------|
| I | -4.11851 | -3.70088 | 1.71435 |
|---|----------|----------|---------|

**I4-ts**

G= -3292.297917 Hartree

|    |          |          |          |
|----|----------|----------|----------|
| Pd | -0.86635 | 1.40662  | -0.65065 |
| P  | 0.72231  | 2.54108  | 0.68269  |
| C  | 1.83937  | 1.65974  | 1.80834  |
| C  | 1.80869  | 1.43329  | 3.16160  |
| O  | 2.89592  | 0.99063  | 1.25728  |
| C  | 2.91980  | 0.57511  | 3.45294  |
| H  | 1.07791  | 1.83715  | 3.85759  |
| C  | 3.55077  | 0.34404  | 2.26250  |
| H  | 3.22346  | 0.19466  | 4.42618  |
| H  | 4.43107  | -0.23021 | 1.96625  |
| C  | 1.87876  | 3.48010  | -0.34629 |
| C  | 1.92664  | 3.62427  | -1.71129 |
| O  | 2.90045  | 4.18652  | 0.22651  |
| C  | 3.04750  | 4.47398  | -1.98871 |
| H  | 1.24655  | 3.15518  | -2.41986 |
| C  | 3.59746  | 4.77938  | -0.77230 |
| H  | 3.39452  | 4.81683  | -2.96144 |
| H  | 4.44902  | 5.38537  | -0.47085 |
| C  | -0.01042 | 3.75757  | 1.80785  |
| C  | 0.47007  | 4.58267  | 2.79517  |
| O  | -1.35764 | 3.95668  | 1.66477  |
| C  | -0.65122 | 5.32293  | 3.28601  |
| H  | 1.50545  | 4.64386  | 3.12294  |
| C  | -1.73075 | 4.89761  | 2.55909  |
| H  | -0.65594 | 6.07127  | 4.07583  |
| H  | -2.78634 | 5.15848  | 2.56859  |
| C  | -1.86633 | 0.23254  | 0.98079  |
| C  | -1.49297 | 0.09635  | 2.33413  |
| C  | -2.46694 | -0.07007 | 3.31508  |
| C  | -3.82117 | -0.11542 | 2.97077  |
| C  | -4.23644 | 0.02602  | 1.63121  |
| C  | -3.23739 | 0.25435  | 0.63801  |
| H  | -0.84552 | -0.36335 | 0.31291  |
| H  | -0.43379 | 0.07108  | 2.59756  |
| H  | -2.18103 | -0.18263 | 4.36541  |
| H  | -4.56006 | -0.25694 | 3.75660  |
| H  | -5.67455 | -0.00551 | 0.23855  |
| N  | -5.57527 | -0.01361 | 1.24487  |
| C  | -6.65344 | -0.82151 | 1.86081  |
| C  | -7.76311 | -0.90001 | 0.79684  |
| H  | -7.40254 | -1.42071 | -0.10622 |
| H  | -8.63101 | -1.45487 | 1.18229  |
| H  | -8.09966 | 0.10872  | 0.50809  |

|    |          |          |          |
|----|----------|----------|----------|
| C  | -7.22610 | -0.12641 | 3.11030  |
| H  | -6.49767 | -0.07139 | 3.93074  |
| H  | -7.53803 | 0.90026  | 2.86466  |
| H  | -8.10234 | -0.67907 | 3.48436  |
| C  | -6.18206 | -2.25189 | 2.18831  |
| H  | -5.77968 | -2.73261 | 1.28415  |
| H  | -5.39122 | -2.26091 | 2.95106  |
| H  | -7.02251 | -2.85669 | 2.56363  |
| C  | -2.46671 | 0.69912  | -1.77240 |
| C  | -2.80706 | 1.99643  | -2.58833 |
| C  | -4.37317 | 1.98211  | -0.96711 |
| C  | -3.65938 | 0.56464  | -0.77487 |
| H  | -4.37455 | -0.19978 | -1.11932 |
| C  | -3.20459 | 2.89417  | -1.38116 |
| H  | -3.52662 | 3.90034  | -1.68822 |
| H  | -2.42794 | 2.99692  | -0.59226 |
| C  | -4.17085 | 1.84897  | -3.26176 |
| C  | -5.10207 | 1.87313  | -2.29617 |
| H  | -4.30935 | 1.65865  | -4.32389 |
| H  | -1.99080 | 2.33880  | -3.23840 |
| H  | -4.96741 | 2.28731  | -0.09747 |
| S  | -2.24777 | -0.77424 | -2.86358 |
| O  | -3.05306 | -0.55729 | -4.09016 |
| O  | -0.82058 | -1.09318 | -3.02546 |
| C  | -3.02755 | -2.13911 | -1.97413 |
| C  | -2.35100 | -2.74939 | -0.91520 |
| C  | -4.31046 | -2.54502 | -2.34808 |
| C  | -2.99127 | -3.77297 | -0.21446 |
| H  | -1.35030 | -2.41041 | -0.63606 |
| C  | -4.93213 | -3.57274 | -1.63562 |
| H  | -4.80807 | -2.04940 | -3.18349 |
| C  | -4.28563 | -4.20032 | -0.55711 |
| H  | -2.47660 | -4.24662 | 0.62683  |
| H  | -5.93819 | -3.89252 | -1.92128 |
| C  | -4.95026 | -5.32025 | 0.20344  |
| H  | -6.04149 | -5.31558 | 0.06360  |
| H  | -4.57619 | -6.30066 | -0.13902 |
| H  | -4.74135 | -5.25101 | 1.28241  |
| C  | 1.06553  | -0.81529 | -0.89157 |
| O  | 2.00020  | -1.59739 | -1.21650 |
| O  | 0.99273  | 0.37278  | -1.40382 |
| O  | 0.21349  | -1.19330 | 0.04004  |
| Cs | 2.17717  | -3.18365 | 1.24108  |
| Cs | 4.03588  | 0.40258  | -1.89305 |
| I  | 6.02441  | -2.16887 | 0.56046  |
| H  | -6.17677 | 1.71539  | -2.40692 |



**J1**

G= -3292.362826 Hartree

|    |          |          |          |
|----|----------|----------|----------|
| Pd | 0.28961  | 1.12662  | 0.40793  |
| P  | -1.78774 | 2.25795  | 0.84230  |
| C  | -3.17252 | 1.26558  | 0.20117  |
| C  | -3.41510 | 0.85871  | -1.08563 |
| O  | -4.14887 | 0.77396  | 1.02597  |
| C  | -4.62934 | 0.09481  | -1.04979 |
| H  | -2.79619 | 1.08547  | -1.95191 |
| C  | -5.02545 | 0.06762  | 0.25904  |
| H  | -5.14549 | -0.36781 | -1.88917 |
| H  | -5.83908 | -0.42547 | 0.78879  |
| C  | -2.04424 | 2.35091  | 2.63541  |
| C  | -1.12494 | 2.19866  | 3.64491  |
| O  | -3.23686 | 2.76779  | 3.16382  |
| C  | -1.79727 | 2.53993  | 4.86296  |
| H  | -0.09213 | 1.88414  | 3.51123  |
| C  | -3.07521 | 2.87875  | 4.50350  |
| H  | -1.38310 | 2.54843  | 5.86919  |
| H  | -3.94476 | 3.21082  | 5.06669  |
| C  | -2.30586 | 3.92698  | 0.33226  |
| C  | -3.21431 | 4.41313  | -0.57366 |
| O  | -1.56755 | 4.95486  | 0.84312  |
| C  | -3.01735 | 5.83293  | -0.61354 |
| H  | -3.93201 | 3.82371  | -1.13886 |
| C  | -2.00746 | 6.10135  | 0.26733  |
| H  | -3.55993 | 6.55709  | -1.21767 |
| H  | -1.51304 | 7.01678  | 0.58277  |
| C  | 1.34306  | 2.40987  | -0.72904 |
| C  | 0.85118  | 3.62785  | -1.23864 |
| C  | 1.68851  | 4.44062  | -2.00915 |
| C  | 3.00073  | 4.06684  | -2.30867 |
| C  | 3.52324  | 2.84488  | -1.83163 |
| C  | 2.66901  | 2.03311  | -1.03060 |
| H  | -0.53446 | -0.80368 | -0.67313 |
| H  | -0.16856 | 3.95671  | -1.04278 |
| H  | 1.30785  | 5.39088  | -2.39745 |
| H  | 3.60880  | 4.71995  | -2.93239 |
| H  | 4.99238  | 1.43025  | -1.85515 |
| N  | 4.80286  | 2.38836  | -2.12144 |
| C  | 6.02104  | 3.16923  | -2.39793 |
| C  | 7.20701  | 2.20981  | -2.19016 |
| H  | 7.12212  | 1.32968  | -2.84585 |
| H  | 8.15421  | 2.72286  | -2.41537 |
| H  | 7.25221  | 1.83808  | -1.15491 |
| C  | 6.16680  | 4.34760  | -1.41480 |
| H  | 5.33582  | 5.06180  | -1.49648 |

|    |          |          |          |
|----|----------|----------|----------|
| H  | 6.18971  | 3.97585  | -0.37832 |
| H  | 7.10424  | 4.89303  | -1.60761 |
| C  | 6.04686  | 3.67216  | -3.85675 |
| H  | 5.93992  | 2.82267  | -4.54893 |
| H  | 5.23214  | 4.37989  | -4.06446 |
| H  | 6.99856  | 4.18331  | -4.07518 |
| C  | 2.01436  | -0.01821 | 0.27662  |
| C  | 2.61715  | -0.27780 | 1.70558  |
| C  | 4.23726  | 0.91803  | 0.68609  |
| C  | 3.15661  | 0.73940  | -0.45991 |
| H  | 1.75330  | -0.96981 | -0.21492 |
| H  | 3.59952  | 0.10956  | -1.24874 |
| C  | 3.36538  | 1.05119  | 1.94942  |
| H  | 3.96526  | 1.05508  | 2.87266  |
| H  | 2.70444  | 1.92932  | 1.92281  |
| C  | 3.78972  | -1.22372 | 1.46680  |
| C  | 4.75959  | -0.48888 | 0.88858  |
| H  | 3.77534  | -2.30736 | 1.59524  |
| H  | 1.88548  | -0.60674 | 2.45467  |
| H  | 4.98678  | 1.69495  | 0.49976  |
| S  | 6.21018  | -0.99016 | 0.02576  |
| O  | 5.95217  | -0.76522 | -1.41765 |
| O  | 7.37791  | -0.33006 | 0.64024  |
| C  | 6.33394  | -2.75371 | 0.30537  |
| C  | 7.07357  | -3.22013 | 1.39455  |
| C  | 5.67662  | -3.63164 | -0.55979 |
| C  | 7.14549  | -4.59509 | 1.62032  |
| H  | 7.58639  | -2.50890 | 2.04459  |
| C  | 5.75937  | -5.00319 | -0.31754 |
| H  | 5.11706  | -3.23704 | -1.40987 |
| C  | 6.49269  | -5.50645 | 0.77157  |
| H  | 7.72196  | -4.96948 | 2.47064  |
| H  | 5.24794  | -5.69817 | -0.98901 |
| C  | 6.60756  | -6.99162 | 1.00463  |
| H  | 5.73868  | -7.53416 | 0.60287  |
| H  | 7.50571  | -7.39232 | 0.50313  |
| H  | 6.70032  | -7.22703 | 2.07571  |
| C  | -1.18630 | -1.55178 | 0.96538  |
| O  | -1.79073 | -2.51053 | 1.47852  |
| O  | -0.77663 | -0.51643 | 1.57039  |
| O  | -0.99619 | -1.62208 | -0.39152 |
| Cs | -3.60259 | -3.71743 | -0.56239 |
| Cs | -3.17500 | -1.01079 | 3.76882  |
| I  | -6.16746 | -3.11038 | 2.29333  |

**J2**

G= -3292.373937 Hartree

|    |          |          |          |
|----|----------|----------|----------|
| Pd | -0.19528 | 1.14081  | 0.17596  |
| P  | 1.86160  | 1.88857  | 1.17505  |
| C  | 1.83720  | 3.36348  | 2.22429  |
| C  | 0.79331  | 4.15373  | 2.63740  |
| O  | 2.99326  | 3.77273  | 2.83481  |
| C  | 1.34627  | 5.10663  | 3.55206  |
| H  | -0.23781 | 4.06147  | 2.30463  |
| C  | 2.68324  | 4.82543  | 3.62643  |
| H  | 0.81950  | 5.90020  | 4.07777  |
| H  | 3.50894  | 5.27467  | 4.17384  |
| C  | 2.31746  | 0.65526  | 2.44371  |
| C  | 1.92625  | 0.56405  | 3.75496  |
| O  | 2.98440  | -0.48211 | 2.08497  |
| C  | 2.38370  | -0.71030 | 4.22767  |
| H  | 1.37399  | 1.32105  | 4.30767  |
| C  | 3.02180  | -1.30398 | 3.17603  |
| H  | 2.26808  | -1.12692 | 5.22630  |
| H  | 3.52782  | -2.26219 | 3.04236  |
| C  | 3.41887  | 2.03428  | 0.24442  |
| C  | 4.75228  | 2.01981  | 0.57575  |
| O  | 3.29264  | 2.15136  | -1.11468 |
| C  | 5.47931  | 2.13548  | -0.65438 |
| H  | 5.15272  | 1.94653  | 1.58461  |
| C  | 4.53458  | 2.21316  | -1.64493 |
| H  | 6.55935  | 2.17270  | -0.78512 |
| H  | 4.59206  | 2.31772  | -2.72595 |
| C  | -1.23187 | 2.80379  | -0.28174 |
| C  | -0.66158 | 4.08696  | -0.39797 |
| C  | -1.45137 | 5.16970  | -0.79067 |
| C  | -2.80456 | 5.00832  | -1.09704 |
| C  | -3.40445 | 3.73336  | -1.03145 |
| C  | -2.60000 | 2.63649  | -0.60681 |
| H  | 0.39537  | 4.25042  | -0.18093 |
| H  | -1.00774 | 6.16765  | -0.86643 |
| H  | -3.38194 | 5.87884  | -1.39966 |
| H  | -4.93048 | 2.50419  | -1.48250 |
| N  | -4.74422 | 3.48754  | -1.33553 |
| C  | -5.69094 | 4.33917  | -2.07632 |
| C  | -6.93450 | 3.46369  | -2.31729 |
| H  | -7.35341 | 3.10910  | -1.36191 |
| H  | -7.71311 | 4.03410  | -2.84511 |
| H  | -6.68464 | 2.58472  | -2.93553 |
| C  | -5.13253 | 4.78811  | -3.44317 |
| H  | -4.23205 | 5.40767  | -3.33685 |
| H  | -4.86378 | 3.90951  | -4.05081 |
| H  | -5.88549 | 5.37339  | -3.99486 |
| C  | -6.11954 | 5.55307  | -1.22844 |

|    |          |          |          |
|----|----------|----------|----------|
| H  | -6.52839 | 5.21446  | -0.26407 |
| H  | -5.28489 | 6.23402  | -1.01692 |
| H  | -6.89627 | 6.12970  | -1.75520 |
| C  | -3.14756 | 1.23437  | -0.52273 |
| C  | -4.19139 | 0.99974  | 0.65883  |
| C  | -2.47384 | -0.35802 | 1.20544  |
| C  | -1.99966 | 0.25413  | -0.15276 |
| H  | -3.62142 | 0.94926  | -1.48195 |
| H  | -1.83289 | -0.53717 | -0.89687 |
| C  | -3.22968 | 0.82050  | 1.85424  |
| H  | -3.75091 | 0.54022  | 2.78236  |
| H  | -2.58769 | 1.69472  | 2.02902  |
| C  | -4.69392 | -0.42423 | 0.48110  |
| C  | -3.66717 | -1.22332 | 0.82856  |
| H  | -5.64486 | -0.72737 | 0.04061  |
| H  | -4.96067 | 1.77742  | 0.73673  |
| H  | -1.69687 | -0.85068 | 1.79992  |
| S  | -3.48395 | -2.96461 | 0.67896  |
| O  | -2.48222 | -3.24275 | -0.37831 |
| O  | -3.18980 | -3.50348 | 2.03015  |
| C  | -5.07585 | -3.56895 | 0.14323  |
| C  | -6.03466 | -3.91418 | 1.09894  |
| C  | -5.34075 | -3.66063 | -1.22635 |
| C  | -7.28534 | -4.35579 | 0.66594  |
| H  | -5.79662 | -3.84010 | 2.16153  |
| C  | -6.59726 | -4.10393 | -1.63817 |
| H  | -4.56904 | -3.39183 | -1.94999 |
| C  | -7.58664 | -4.45867 | -0.70346 |
| H  | -8.04250 | -4.62848 | 1.40574  |
| H  | -6.81470 | -4.17933 | -2.70692 |
| C  | -8.92792 | -4.96979 | -1.16362 |
| H  | -9.24031 | -4.49283 | -2.10495 |
| H  | -8.88235 | -6.05717 | -1.34843 |
| H  | -9.70937 | -4.79724 | -0.40880 |
| C  | 1.38999  | -1.37089 | -0.59757 |
| O  | 1.81938  | -2.53133 | -0.67143 |
| O  | 1.87001  | -0.49640 | -1.54140 |
| O  | 0.60415  | -0.91647 | 0.28937  |
| Cs | 0.23639  | -3.73331 | 1.65461  |
| Cs | 4.75189  | -1.88437 | -0.46444 |
| I  | 4.28414  | -4.85076 | 2.04853  |
| H  | 1.43631  | 0.37156  | -1.42067 |

### J3

G= -3292.370023 Hartree

|    |          |         |          |
|----|----------|---------|----------|
| Pd | 0.04507  | 2.23367 | -0.97969 |
| P  | -1.85510 | 2.62928 | 0.46117  |

|   |          |          |          |
|---|----------|----------|----------|
| C | -1.81013 | 3.78853  | 1.86266  |
| C | -1.85025 | 3.63972  | 3.22548  |
| O | -1.52257 | 5.08828  | 1.55070  |
| C | -1.57586 | 4.93340  | 3.77954  |
| H | -2.03668 | 2.71289  | 3.76152  |
| C | -1.38804 | 5.77079  | 2.71656  |
| H | -1.52423 | 5.20191  | 4.83260  |
| H | -1.16613 | 6.83137  | 2.62809  |
| C | -3.38955 | 3.18987  | -0.35856 |
| C | -3.99646 | 4.41778  | -0.42941 |
| O | -4.01818 | 2.31946  | -1.20447 |
| C | -5.06279 | 4.28906  | -1.38029 |
| H | -3.69861 | 5.30645  | 0.12107  |
| C | -5.02558 | 2.99828  | -1.82095 |
| H | -5.75976 | 5.06144  | -1.69867 |
| H | -5.61002 | 2.43905  | -2.54740 |
| C | -2.40681 | 1.10600  | 1.28785  |
| C | -3.47500 | 0.77347  | 2.08918  |
| O | -1.66631 | -0.01750 | 1.04100  |
| C | -3.36950 | -0.63158 | 2.34692  |
| H | -4.23955 | 1.46114  | 2.44603  |
| C | -2.24902 | -1.05637 | 1.67866  |
| H | -4.03594 | -1.25023 | 2.94474  |
| H | -1.78954 | -2.03274 | 1.53778  |
| C | 1.57981  | 2.39918  | 0.30174  |
| C | 1.52177  | 3.17546  | 1.47139  |
| C | 2.64524  | 3.30315  | 2.28857  |
| C | 3.84108  | 2.66997  | 1.96568  |
| C | 3.96330  | 1.89665  | 0.78973  |
| C | 2.80348  | 1.75763  | -0.04189 |
| H | -0.78760 | 0.02676  | -1.29510 |
| H | 0.61228  | 3.70431  | 1.74635  |
| H | 2.58922  | 3.90558  | 3.20077  |
| H | 4.68989  | 2.77321  | 2.63601  |
| H | 5.10868  | 0.48308  | -0.12886 |
| N | 5.17238  | 1.30843  | 0.44525  |
| C | 6.53809  | 1.59264  | 0.91244  |
| C | 7.47108  | 0.82734  | -0.04589 |
| H | 7.33818  | 1.17213  | -1.08368 |
| H | 8.52324  | 0.98315  | 0.23471  |
| H | 7.26780  | -0.25509 | -0.00945 |
| C | 6.79444  | 1.07448  | 2.34543  |
| H | 6.19129  | 1.60345  | 3.09541  |
| H | 6.53998  | 0.00663  | 2.40686  |
| H | 7.85433  | 1.20003  | 2.61894  |
| C | 6.85865  | 3.09488  | 0.80234  |
| H | 6.70876  | 3.43879  | -0.23262 |

|    |          |          |          |
|----|----------|----------|----------|
| H  | 6.22242  | 3.70746  | 1.45413  |
| H  | 7.90733  | 3.27783  | 1.08415  |
| C  | 2.71581  | 1.45829  | -4.32266 |
| C  | 2.14398  | 2.45611  | -3.32594 |
| C  | 3.96922  | 1.52121  | -2.37745 |
| C  | 3.78456  | 0.88312  | -3.74702 |
| H  | 2.23782  | 1.17215  | -5.26246 |
| H  | 4.36236  | 0.03714  | -4.11786 |
| C  | 3.44770  | 2.95569  | -2.67377 |
| H  | 3.29213  | 3.56776  | -1.77511 |
| H  | 4.10574  | 3.48567  | -3.37847 |
| C  | 1.52388  | 1.55283  | -2.20100 |
| C  | 2.79301  | 1.09021  | -1.40407 |
| H  | 1.02011  | 0.70689  | -2.68936 |
| H  | 1.45120  | 3.20735  | -3.72461 |
| H  | 4.96815  | 1.45269  | -1.94183 |
| S  | 2.52625  | -0.75916 | -1.20365 |
| O  | 1.16876  | -0.95399 | -0.62182 |
| O  | 2.79210  | -1.47674 | -2.48316 |
| C  | 3.67708  | -1.42036 | 0.00121  |
| C  | 4.83177  | -2.07001 | -0.44421 |
| C  | 3.38209  | -1.31070 | 1.36388  |
| C  | 5.71544  | -2.59817 | 0.49867  |
| H  | 5.02486  | -2.16413 | -1.51416 |
| C  | 4.28074  | -1.83907 | 2.28865  |
| H  | 2.46623  | -0.81395 | 1.68559  |
| C  | 5.45944  | -2.48601 | 1.87569  |
| H  | 6.61841  | -3.11171 | 0.15812  |
| H  | 4.06266  | -1.74907 | 3.35586  |
| C  | 6.44076  | -3.01640 | 2.88904  |
| H  | 5.93286  | -3.36114 | 3.80219  |
| H  | 7.03383  | -3.84940 | 2.48351  |
| H  | 7.14857  | -2.22370 | 3.18891  |
| C  | -1.87973 | 0.71433  | -2.79845 |
| O  | -2.72225 | 0.35377  | -3.62704 |
| O  | -1.38740 | 1.86060  | -2.61377 |
| O  | -1.45397 | -0.30260 | -1.93611 |
| Cs | -0.08746 | -2.83690 | -3.02760 |
| Cs | -4.51407 | -1.00692 | -1.46494 |
| I  | -2.83562 | -4.39549 | -0.72586 |

#### J4

G= -3292.387502 Hartree

|    |          |          |          |
|----|----------|----------|----------|
| Pd | -0.97714 | 1.08989  | -0.47529 |
| P  | 0.63802  | 1.72310  | 1.16101  |
| C  | 2.17086  | 0.85222  | 0.71836  |
| C  | 2.34257  | -0.44502 | 0.30782  |

|   |          |          |          |
|---|----------|----------|----------|
| O | 3.39229  | 1.46307  | 0.84642  |
| C | 3.75908  | -0.64369 | 0.19494  |
| H | 1.54772  | -1.15412 | 0.08273  |
| C | 4.34478  | 0.54838  | 0.52098  |
| H | 4.27601  | -1.55681 | -0.09458 |
| H | 5.37267  | 0.90309  | 0.51960  |
| C | 1.05622  | 3.47725  | 1.28455  |
| C | 0.35334  | 4.54633  | 0.78069  |
| O | 2.12083  | 3.93355  | 2.01445  |
| C | 1.03399  | 5.72520  | 1.22481  |
| H | -0.54779 | 4.47663  | 0.17413  |
| C | 2.09629  | 5.28569  | 1.97031  |
| H | 0.76311  | 6.76077  | 1.02968  |
| H | 2.88789  | 5.79839  | 2.51271  |
| C | 0.50925  | 1.22661  | 2.91436  |
| C | 0.81951  | 0.05250  | 3.55448  |
| O | -0.12941 | 2.06577  | 3.77901  |
| C | 0.33396  | 0.18713  | 4.89716  |
| H | 1.33670  | -0.79808 | 3.11714  |
| C | -0.23123 | 1.42883  | 4.97379  |
| H | 0.40826  | -0.54246 | 5.70092  |
| H | -0.71424 | 1.98455  | 5.77360  |
| C | -2.68478 | 1.23377  | 0.55418  |
| C | -2.79356 | 1.85064  | 1.81320  |
| C | -4.04176 | 1.94371  | 2.43250  |
| C | -5.19176 | 1.42528  | 1.83528  |
| C | -5.11979 | 0.80906  | 0.56901  |
| C | -3.84939 | 0.74196  | -0.07207 |
| H | 0.75212  | -0.82667 | -2.28362 |
| H | -1.92692 | 2.26724  | 2.32107  |
| H | -4.12458 | 2.42938  | 3.40994  |
| H | -6.14272 | 1.51323  | 2.35534  |
| H | -5.96232 | -0.26206 | -0.90901 |
| N | -6.22321 | 0.28785  | -0.10155 |
| C | -7.51670 | -0.14137 | 0.46024  |
| C | -8.21373 | -0.92923 | -0.66362 |
| H | -7.62566 | -1.81975 | -0.94257 |
| H | -9.20826 | -1.26953 | -0.33962 |
| H | -8.33843 | -0.30107 | -1.56018 |
| C | -8.39626 | 1.07384  | 0.81422  |
| H | -7.96661 | 1.67876  | 1.62354  |
| H | -8.51283 | 1.72408  | -0.06622 |
| H | -9.39459 | 0.74086  | 1.13973  |
| C | -7.34317 | -1.07068 | 1.67968  |
| H | -6.72698 | -1.94086 | 1.40761  |
| H | -6.84643 | -0.56295 | 2.51752  |
| H | -8.32248 | -1.43139 | 2.03231  |

|    |          |          |          |
|----|----------|----------|----------|
| C  | -2.17790 | -0.06621 | -1.74951 |
| C  | -2.08202 | 0.37808  | -3.25235 |
| C  | -4.20709 | 0.89514  | -2.69183 |
| C  | -3.69158 | 0.09754  | -1.41544 |
| H  | -4.20920 | -0.87905 | -1.42571 |
| C  | -2.94312 | 1.66277  | -3.13213 |
| H  | -3.07554 | 2.16968  | -4.09989 |
| H  | -2.56614 | 2.37521  | -2.38368 |
| C  | -3.01241 | -0.48076 | -4.10577 |
| C  | -4.27594 | -0.15174 | -3.79155 |
| H  | -2.68174 | -1.29269 | -4.75277 |
| H  | -1.05450 | 0.48867  | -3.61300 |
| H  | -5.11619 | 1.47883  | -2.49775 |
| S  | -1.64899 | -1.78313 | -1.45976 |
| O  | -2.22596 | -2.73041 | -2.44048 |
| O  | -0.14721 | -1.80701 | -1.33459 |
| C  | -2.31223 | -2.21704 | 0.15441  |
| C  | -1.72121 | -1.74007 | 1.32605  |
| C  | -3.48998 | -2.96762 | 0.19982  |
| C  | -2.35348 | -1.96034 | 2.54820  |
| H  | -0.79850 | -1.16531 | 1.28281  |
| C  | -4.10351 | -3.19246 | 1.43225  |
| H  | -3.91590 | -3.35783 | -0.72609 |
| C  | -3.56510 | -2.66687 | 2.61938  |
| H  | -1.90556 | -1.54924 | 3.45651  |
| H  | -5.02709 | -3.77625 | 1.47251  |
| C  | -4.29870 | -2.81749 | 3.92671  |
| H  | -4.83501 | -3.77707 | 3.98578  |
| H  | -3.61833 | -2.74314 | 4.78812  |
| H  | -5.05021 | -2.01494 | 4.02851  |
| C  | 1.48737  | 0.95386  | -2.69768 |
| O  | 2.37803  | 1.54216  | -3.35001 |
| O  | 0.70421  | 1.50980  | -1.87289 |
| O  | 1.40349  | -0.38419 | -2.89412 |
| Cs | 4.41784  | -0.62421 | -3.79842 |
| Cs | 3.22308  | 3.84292  | -1.66481 |
| I  | 6.71438  | 2.13209  | -2.21336 |
| H  | -5.18939 | -0.64409 | -4.13256 |

## S8. Characterization Data

**1-(tert-butyl)-4-((3a*R*,6*R*,6a*S*)-6-((*R*)-2,2-dimethyl-1,3-dioxolan-4-yl)-2,2-dimethyltetrahydrofuro[3,4-*d*][1,3]dioxol-4-yl)-1*H*-indole (3a)**



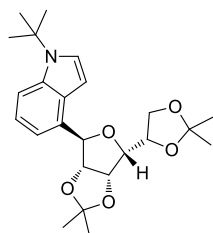

65.6 mg, 79% yield. White crystal.

<sup>1</sup>H NMR (600 MHz, CDCl<sub>3</sub>) δ 7.59 (dd, *J* = 8.5, 1.0 Hz, 1H), 7.32 (d, *J* = 3.4 Hz, 1H), 7.16 (dd, *J* = 8.4, 7.3 Hz, 1H), 7.04 (d, *J* = 7.2 Hz, 1H), 6.56 (dd, *J* = 3.4, 0.8 Hz, 1H), 5.53 (s, 1H), 5.15 (dd, *J* = 6.1, 1.2 Hz, 1H), 4.75 (dd, *J* = 6.1, 3.6 Hz, 1H), 4.56-4.53 (m, 1H), 4.30-4.28 (m, 1H), 4.24-4.21 (m, 1H), 4.12 (dd, *J* = 7.8, 3.7 Hz, 1H), 1.74 (s, 9H), 1.63 (s, 3H), 1.45 (s, 3H), 1.41 (s, 3H), 1.39 (s, 3H). <sup>13</sup>C NMR (151 MHz, CDCl<sub>3</sub>) δ 135.03, 130.34, 127.19, 125.37, 120.40, 114.50, 112.88, 112.70, 109.17, 98.29, 86.79, 84.85, 81.73, 81.07, 73.68, 67.14, 55.92, 29.82, 26.93, 26.33, 25.23, 24.93. HRMS (ESI) *m/z* calculated for C<sub>24</sub>H<sub>33</sub>NO<sub>5</sub>Na [M+Na]<sup>+</sup> 438.2251, found 438.2250.

**1-(tert-butyl)-4-((3aR,6R,6aS)-6-((R)-2,2-dimethyl-1,3-dioxolan-4-yl)-2,2-dimethyltetrahydrofuro[3,4-d][1,3]dioxol-4-yl)-6-methyl-1H-indole (3b)**

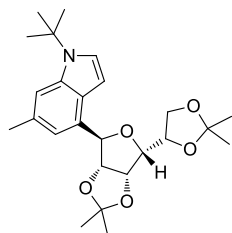

61.9 mg, 72% yield. White crystal.

<sup>1</sup>H NMR (400 MHz, CDCl<sub>3</sub>) δ 7.39 (s, 1H), 7.25 (d, *J* = 3.4 Hz, 1H), 6.85 (s, 1H), 6.50 (d, *J* = 3.3 Hz, 1H), 5.51 (s, 1H), 5.15 (dd, *J* = 6.1, 1.2 Hz, 1H), 4.77 (dd, *J* = 6.1, 3.7 Hz, 1H), 4.57-4.53 (m, 1H), 4.30-4.21 (m, 2H), 4.12 (dd, *J* = 7.8, 3.7 Hz, 1H), 2.51 (s, 3H), 1.73 (s, 9H), 1.63 (s, 3H), 1.46 (s, 3H), 1.41 (s, 3H), 1.39 (s, 3H). <sup>13</sup>C NMR (101 MHz, CDCl<sub>3</sub>) δ 135.42, 129.95, 129.93, 125.05, 124.78, 116.18, 112.82, 112.63, 109.11, 98.07, 86.73, 84.77, 81.71, 81.01, 73.63, 67.15, 55.74, 29.75, 26.86, 26.28, 25.17, 24.85, 22.40. HRMS (ESI) *m/z* calculated for C<sub>25</sub>H<sub>35</sub>NO<sub>5</sub>Na [M+Na]<sup>+</sup> 452.2407, found 452.2405.

**1-(tert-butyl)-4-((3aR,6R,6aS)-6-((R)-2,2-dimethyl-1,3-dioxolan-4-yl)-2,2-dimethyltetrahydrofuro[3,4-d][1,3]dioxol-4-yl)-6-fluoro-1H-indole (3c)**

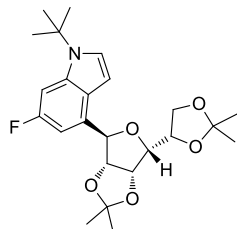

64.2 mg, 74% yield. White crystal.

<sup>1</sup>H NMR (400 MHz, CDCl<sub>3</sub>) δ 7.29-7.24 (m, 2H), 6.84 (d, *J* = 10.0 Hz, 1H), 6.53 (d, *J* = 3.4 Hz, 1H), 5.48 (s, 1H), 5.09 (d, *J* = 5.9 Hz, 1H), 4.76 (dd, *J* = 6.0, 3.6 Hz, 1H), 4.56-4.51 (m, 1H), 4.28-4.20 (m, 2H), 4.10 (dd, *J* = 7.5, 3.6 Hz, 1H), 1.71 (s, 9H), 1.62 (s, 3H), 1.47 (s, 3H), 1.41 (s, 3H), 1.39 (s, 3H).

$^{13}\text{C}$  NMR (101 MHz,  $\text{CDCl}_3$ )  $\delta$  158.68 (d,  $J = 236.0$  Hz), 134.73 (d,  $J = 12.0$  Hz), 131.88 (d,  $J = 8.8$  Hz), 125.60 (d,  $J = 3.5$  Hz), 123.43, 112.92, 109.18, 103.78 (d,  $J = 26.2$  Hz), 98.97 (d,  $J = 27.1$  Hz), 98.50, 86.80, 84.60 (d,  $J = 1.5$  Hz), 81.95, 81.03, 73.61, 67.04, 56.01, 29.63, 26.87, 26.36, 25.22, 24.96.  $^{19}\text{F}$  NMR (376 MHz,  $\text{CDCl}_3$ )  $\delta$  -120.85. HRMS (ESI)  $m/z$  calculated for  $\text{C}_{24}\text{H}_{32}\text{FNO}_5\text{Na}$   $[\text{M}+\text{Na}]^+$  456.2157, found 456.2153.

**1-(tert-butyl)-6-chloro-4-((3a*R*,6*R*,6a*S*)-6-((*R*)-2,2-dimethyl-1,3-dioxolan-4-yl)-2,2-dimethyltetrahydrofuro[3,4-*d*][1,3]dioxol-4-yl)-1*H*-indole (3d)**

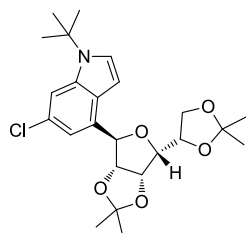

71.1 mg, 79% yield. White crystal.

$^1\text{H}$  NMR (400 MHz,  $\text{CDCl}_3$ )  $\delta$  7.57 (d,  $J = 1.6$  Hz, 1H), 7.30 (d,  $J = 3.4$  Hz, 1H), 6.99 (t,  $J = 1.4$  Hz, 1H), 6.54 (d,  $J = 3.3$  Hz, 1H), 5.47 (s, 1H), 5.07 (dd,  $J = 6.0, 1.4$  Hz, 1H), 4.77 (dd,  $J = 6.1, 3.7$  Hz, 1H), 4.56-4.51 (m, 1H), 4.27-4.20 (m, 2H), 4.09 (dd,  $J = 7.5, 3.7$  Hz, 1H), 1.72 (s, 9H), 1.62 (s, 3H), 1.47 (s, 3H), 1.41 (s, 3H), 1.39 (s, 3H).  $^{13}\text{C}$  NMR (101 MHz,  $\text{CDCl}_3$ )  $\delta$  135.31, 131.84, 126.53, 126.03, 125.78, 115.28, 112.91, 112.56, 109.16, 98.66, 86.68, 84.52, 81.96, 81.04, 73.59, 67.08, 56.14, 29.78, 26.83, 26.36, 25.22, 24.95. HRMS (ESI)  $m/z$  calculated for  $\text{C}_{24}\text{H}_{32}\text{ClNO}_5\text{Na}$   $[\text{M}+\text{Na}]^+$  472.1861, found 472.1859.

**1-(tert-butyl)-4-((3a*R*,6*R*,6a*S*)-6-((*R*)-2,2-dimethyl-1,3-dioxolan-4-yl)-2,2-dimethyltetrahydrofuro[3,4-*d*][1,3]dioxol-4-yl)-1*H*-indole-6-carboxylate (3e)**

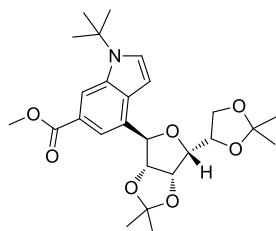

68.2 mg, 72% yield. White crystal.

$^1\text{H}$  NMR (400 MHz,  $\text{CDCl}_3$ )  $\delta$  8.37 (s, 1H), 7.70 (s, 1H), 7.47 (d,  $J = 3.3$  Hz, 1H), 6.63 (d,  $J = 3.3$  Hz, 1H), 5.51 (s, 1H), 5.15 (d,  $J = 5.9$  Hz, 1H), 4.81 (dd,  $J = 6.1, 3.7$  Hz, 1H), 4.54 (q,  $J = 6.0$  Hz, 1H), 4.23 (d,  $J = 5.6$  Hz, 2H), 4.05 (dd,  $J = 7.8, 3.7$  Hz, 1H), 3.95 (s, 3H), 1.78 (s, 9H), 1.63 (s, 3H), 1.45 (s, 3H), 1.41 (s, 6H).  $^{13}\text{C}$  NMR (101 MHz, Chloroform-*d*)  $\delta$  168.17, 134.51, 131.30, 130.05, 128.76, 122.13, 115.73, 115.37, 112.87, 109.22, 99.20, 86.24, 84.43, 81.87, 81.13, 73.57, 67.29, 56.53, 52.06, 30.09, 26.80, 26.40, 25.34, 24.98. HRMS (ESI)  $m/z$  calculated for  $\text{C}_{26}\text{H}_{35}\text{NO}_7\text{Na}$   $[\text{M}+\text{Na}]^+$  496.2306, found 496.2304.

**1-(tert-butyl)-4-((3a*R*,6*R*,6a*S*)-6-((*R*)-2,2-dimethyl-1,3-dioxolan-4-yl)-2,2-dimethyltetrahydrofuro[3,4-*d*][1,3]dioxol-4-yl)-6-(trifluoromethyl)-1*H*-indole (3f)**

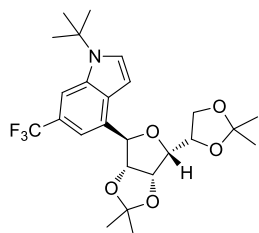

68.7 mg, 71% yield. White crystal.

<sup>1</sup>H NMR (400 MHz, CDCl<sub>3</sub>) δ 7.85 (s, 1H), 7.45 (d, *J* = 3.4 Hz, 1H), 7.25 (s, 1H), 6.63 (dd, *J* = 3.4, 0.9 Hz, 1H), 5.52 (s, 1H), 5.10 (dd, *J* = 6.0, 1.4 Hz, 1H), 4.79 (dd, *J* = 6.0, 3.6 Hz, 1H), 4.57-4.52 (m, 1H), 4.26-4.21 (m, 2H), 4.08 (dd, *J* = 7.5, 3.6 Hz, 1H), 1.76 (s, 9H), 1.64 (s, 3H), 1.46 (s, 3H), 1.42 (s, 3H), 1.40 (s, 3H). <sup>13</sup>C NMR (101 MHz, CDCl<sub>3</sub>) δ 133.99, 131.35, 129.64, 128.10, 125.22 (q, *J* = 271.5 Hz), 122.55 (q, *J* = 31.6 Hz), 113.01, 111.20 (q, *J* = 3.4 Hz), 110.16 (q, *J* = 4.5 Hz), 109.22, 98.96, 86.55, 84.56, 82.01, 81.06, 73.55, 67.13, 56.48, 29.95, 26.76, 26.40, 25.30, 24.99. <sup>19</sup>F NMR (376 MHz, CDCl<sub>3</sub>) δ -60.34. HRMS (ESI) *m/z* calculated for C<sub>25</sub>H<sub>32</sub>F<sub>3</sub>NO<sub>5</sub>Na [M+Na]<sup>+</sup> 506.2125, found 506.2124.

**1-(tert-butyl)-4-((3*aR*,6*R*,6*aS*)-6-((*R*)-2,2-dimethyl-1,3-dioxolan-4-yl)-2,2-dimethyltetrahydrofuro[3,4-*d*][1,3]dioxol-4-yl)-6-nitro-1*H*-indole (3g)**

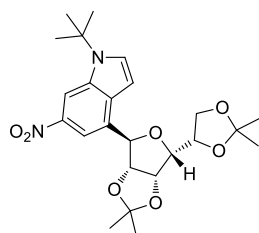

60.8 mg, 66% yield. Light yellow crystal.

<sup>1</sup>H NMR (400 MHz, CDCl<sub>3</sub>) δ 8.59 (d, *J* = 1.9 Hz, 1H), 7.93 (t, *J* = 1.5 Hz, 1H), 7.58 (d, *J* = 3.3 Hz, 1H), 6.69 (d, *J* = 3.3 Hz, 1H), 5.49 (s, 1H), 5.09 (dd, *J* = 6.0, 1.5 Hz, 1H), 4.82 (dd, *J* = 5.9, 3.7 Hz, 1H), 4.56-4.52 (m, 1H), 4.24 (d, *J* = 5.7 Hz, 2H), 4.07 (dd, *J* = 7.5, 3.6 Hz, 1H), 1.80 (s, 9H), 1.64 (s, 3H), 1.46 (s, 3H), 1.42-1.41 (m, 6H). <sup>13</sup>C NMR (101 MHz, CDCl<sub>3</sub>) δ 142.13, 133.49, 132.24, 131.18, 113.20, 110.30, 109.72, 109.28, 99.97, 86.28, 84.29, 82.14, 81.12, 73.51, 67.16, 57.10, 30.13, 26.80, 26.46, 25.30, 25.03. HRMS (ESI) *m/z* calculated for C<sub>24</sub>H<sub>32</sub>N<sub>2</sub>O<sub>7</sub>Na [M+Na]<sup>+</sup> 483.2102, found 483.2100.

**1-(tert-butyl)-4-((3*aR*,6*R*,6*aS*)-6-((*R*)-2,2-dimethyl-1,3-dioxolan-4-yl)-2,2-dimethyltetrahydrofuro[3,4-*d*][1,3]dioxol-4-yl)-1*H*-indole-6-carbonitrile (3h)**

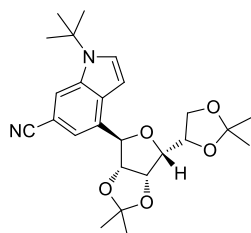

68.7 mg, 78% yield. Light yellow crystal.

<sup>1</sup>H NMR (400 MHz, CDCl<sub>3</sub>) δ 7.93 (s, 1H), 7.51 (d, *J* = 3.3 Hz, 1H), 7.24 (s, 1H), 6.64 (d, *J* = 3.3 Hz, 1H), 5.47 (s, 1H), 5.04 (dd, *J* = 6.0, 1.6 Hz, 1H), 4.78 (dd, *J* = 6.0, 3.6 Hz, 1H), 4.53 (q, *J* = 6.1 Hz, 1H),

4.26-4.19 (m, 2H), 4.08 (dd,  $J = 7.3, 3.6$  Hz, 1H), 1.76 (s, 9H), 1.63 (s, 3H), 1.48 (s, 3H), 1.42-1.39 (m, 6H).  $^{13}\text{C}$  NMR (101 MHz,  $\text{CDCl}_3$ )  $\delta$  133.81, 132.09, 130.50, 129.29, 120.94, 117.80, 117.00, 113.11, 109.20, 103.05, 99.56, 86.47, 84.39, 82.06, 81.05, 73.56, 66.93, 56.77, 29.95, 26.83, 26.39, 25.21, 24.96. **HRMS** (ESI)  $m/z$  calculated for  $\text{C}_{25}\text{H}_{32}\text{N}_2\text{O}_5\text{Na}$   $[\text{M}+\text{Na}]^+$  463.2203, found 463.2200.

**1-(*tert*-butyl)-4-((3*aR*,4*R*,6*R*,6*aS*)-6-((*R*)-2,2-dimethyl-1,3-dioxolan-4-yl)-2,2-dimethyltetrahydrofuro[3,4-*d*][1,3]dioxol-4-yl)-1*H*-pyrrolo[2,3-*b*]pyridine (3i)**

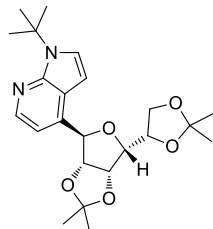

50.8 mg, 61% yield. Light yellow oil.

$^1\text{H}$  NMR (400 MHz,  $\text{CDCl}_3$ )  $\delta$  8.30 (d,  $J = 4.8$  Hz, 1H), 7.38 (d,  $J = 3.7$  Hz, 1H), 7.00-6.99 (m, 1H), 6.52 (d,  $J = 3.7$  Hz, 1H), 5.48 (s, 1H), 5.13-5.12 (m, 1H), 4.74 (dd,  $J = 6.0, 3.6$  Hz, 1H), 4.56-4.52 (m, 1H), 4.31-4.20 (m, 2H), 4.06 (dd,  $J = 7.4, 3.6$  Hz, 1H), 1.81 (s, 9H), 1.62 (s, 3H), 1.46 (s, 3H), 1.41-1.39 (m, 6H).  $^{13}\text{C}$  NMR (101 MHz,  $\text{CDCl}_3$ )  $\delta$  148.13, 141.84, 139.05, 125.65, 118.85, 113.07, 110.84, 109.20, 96.62, 86.65, 84.30, 81.90, 80.98, 73.60, 66.97, 56.60, 29.36, 26.90, 26.34, 25.23, 24.97. **HRMS** (ESI)  $m/z$  calculated for  $\text{C}_{23}\text{H}_{32}\text{N}_2\text{O}_5\text{Na}$   $[\text{M}+\text{Na}]^+$  439.2203, found 439.2202.

**4-((3*aR*,6*R*,6*aS*)-6-((*R*)-2,2-dimethyl-1,3-dioxolan-4-yl)-2,2-dimethyltetrahydrofuro[3,4-*d*][1,3]dioxol-4-yl)-1-(pentan-3-yl)-1*H*-indole (3j)**

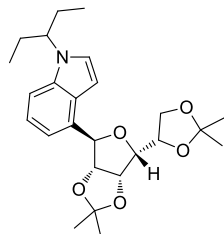

58.4 mg, 68% yield. White crystal.

$^1\text{H}$  NMR (400 MHz,  $\text{CDCl}_3$ )  $\delta$  7.31 (d,  $J = 8.3$  Hz, 1H), 7.18-7.14 (m, 2H), 7.03 (d,  $J = 7.2$  Hz, 1H), 6.65 (d,  $J = 3.2$  Hz, 1H), 5.54 (s, 1H), 5.16 (d,  $J = 6.0$  Hz, 1H), 4.77 (dd,  $J = 6.1, 3.6$  Hz, 1H), 4.58-4.53 (m, 1H), 4.31-4.28 (m, 1H), 4.24-4.21 (m, 1H), 4.15-4.12 (m, 2H), 1.93-1.83 (m, 4H), 1.63 (s, 3H), 1.45 (s, 3H), 1.41-1.40 (m, 6H), 0.77 (td,  $J = 7.4, 1.9$  Hz, 6H).  $^{13}\text{C}$  NMR (101 MHz,  $\text{CDCl}_3$ )  $\delta$  137.01, 130.37, 125.29, 124.53, 120.87, 114.75, 112.74, 109.19, 109.17, 99.72, 86.89, 84.98, 81.79, 81.15, 73.73, 67.17, 59.82, 28.51, 28.49, 26.92, 26.39, 25.28, 25.05, 10.92, 10.89. **HRMS** (ESI)  $m/z$  calculated for  $\text{C}_{25}\text{H}_{32}\text{N}_2\text{O}_5\text{Na}$   $[\text{M}+\text{Na}]^+$  452.2407, found 452.2405.

**1-(cyclohexylmethyl)-4-((3*aR*,6*R*,6*aS*)-6-((*R*)-2,2-dimethyl-1,3-dioxolan-4-yl)-2,2-dimethyltetrahydrofuro[3,4-*d*][1,3]dioxol-4-yl)-1*H*-indole (3k)**

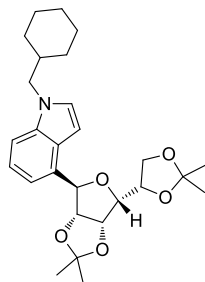

59.2 mg, 65% yield. Light yellow oil.

**<sup>1</sup>H NMR** (400 MHz, CDCl<sub>3</sub>) δ 7.27 (d, *J* = 8.3 Hz, 1H), 7.18 (t, *J* = 7.7 Hz, 1H), 7.10 (d, *J* = 3.2 Hz, 1H), 7.04 (d, *J* = 7.2 Hz, 1H), 6.59 (d, *J* = 3.1 Hz, 1H), 5.53 (s, 1H), 5.16 (d, *J* = 5.9 Hz, 1H), 4.76 (dd, *J* = 6.1, 3.6 Hz, 1H), 4.57-4.53 (m, 1H), 4.30-4.27 (m, 1H), 4.24-4.20 (m, 1H), 4.12 (dd, *J* = 7.7, 3.6 Hz, 1H), 4.99-3.89 (m, 2H), 1.88-1.81 (m, 1H), 1.73-1.63 (m, 8H), 1.45 (s, 3H), 1.40 (d, *J* = 6.5 Hz, 6H), 1.24-1.13 (m, 3H), 1.04-0.95 (m, 2H). **<sup>13</sup>C NMR** (101 MHz, CDCl<sub>3</sub>) δ 136.46, 130.37, 128.69, 125.41, 121.05, 114.78, 112.75, 109.24, 109.17, 99.00, 86.81, 84.91, 81.74, 81.11, 73.69, 67.14, 53.12, 38.82, 31.06, 26.92, 26.36, 26.26, 25.70, 25.67, 25.25, 25.00. **HRMS** (ESI) *m/z* calculated for C<sub>27</sub>H<sub>37</sub>NO<sub>5</sub>Na [M+Na]<sup>+</sup> 478.2564, found 478.2561.

**4-((3*aR*,6*R*,6*aS*)-6-((*R*)-2,2-dimethyl-1,3-dioxolan-4-yl)-2,2-dimethyltetrahydrofuro[3,4-*d*][1,3]dioxol-4-yl)-1-(1-phenylpropan-2-yl)-1*H*-indole (3l)**

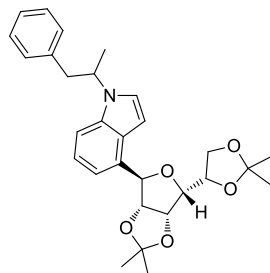

62.1 mg, 65% yield. Light yellow oil.

**<sup>1</sup>H NMR** (400 MHz, CDCl<sub>3</sub>) δ 7.33-7.15 (m, 6H), 7.07-7.01 (m, 3H), 6.63 (t, *J* = 3.7 Hz, 1H), 5.53 (d, *J* = 3.7 Hz, 1H), 5.17-5.13 (m, 1H), 4.79-4.71 (m, 2H), 4.56-4.53 (m, 1H), 4.30-4.20 (m, 2H), 4.13-4.09 (m, 1H), 3.20-3.15 (m, 1H), 3.05-3.02 (m, 1H), 1.63 (s, 3H), 1.53 (dd, *J* = 6.8, 2.2 Hz, 3H), 1.46 (s, 3H), 1.41-1.39 (m, 6H). **<sup>13</sup>C NMR** (101 MHz, CDCl<sub>3</sub>) δ 137.92, 137.86, 135.91, 135.82, 130.49, 130.43, 129.11, 128.44, 128.40, 126.61, 125.60, 125.43, 124.43, 124.25, 121.09, 115.04, 114.97, 112.77, 109.19, 109.10, 109.03, 99.78, 99.72, 86.81, 84.91, 81.76, 81.15, 81.12, 73.69, 67.16, 53.17, 53.08, 43.46, 43.40, 26.94, 26.38, 25.26, 25.07, 25.02, 20.10, 19.99. **HRMS** (ESI) *m/z* calculated for C<sub>29</sub>H<sub>35</sub>NO<sub>5</sub>Na [M+Na]<sup>+</sup> 500.2407, found 500.2405.

**4-((3a*R*,6*R*,6a*S*)-6-((*R*)-2,2-dimethyl-1,3-dioxolan-4-yl)-2,2-dimethyltetrahydrofuro[3,4-*d*][1,3]dioxol-4-yl)-1-(2,4,6-trimethylbenzyl)-1*H*-indole (3m)**

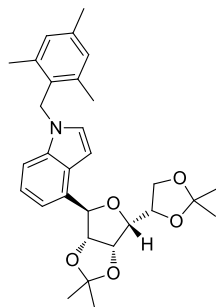

66.9 mg, 68% yield. Light yellow oil.

**<sup>1</sup>H NMR** (400 MHz, CDCl<sub>3</sub>) δ 7.42 (d, *J* = 8.2 Hz, 1H), 7.24 (t, *J* = 7.7 Hz, 1H), 7.09 (d, *J* = 7.2 Hz, 1H), 6.94 (s, 2H), 6.65 (d, *J* = 3.3 Hz, 1H), 6.51 (d, *J* = 3.3 Hz, 1H), 5.52 (s, 1H), 5.20 (s, 2H), 5.15 (d, *J* = 6.0 Hz, 1H), 4.75 (dd, *J* = 6.1, 3.6 Hz, 1H), 4.57-4.52 (m, 1H), 4.30-4.20 (m, 2H), 4.12 (dd, *J* = 7.8, 3.7 Hz, 1H), 2.32 (s, 3H), 2.21 (s, 6H), 1.61 (s, 3H), 1.45 (s, 3H), 1.41 (s, 3H), 1.37 (s, 3H). **<sup>13</sup>C NMR** (101 MHz, CDCl<sub>3</sub>) δ 138.12, 138.00, 136.59, 130.41, 129.36, 128.66, 126.06, 125.82, 121.20, 115.23, 112.72, 109.15, 108.83, 99.30, 86.76, 84.84, 81.71, 81.08, 73.69, 67.12, 43.81, 26.92, 26.32, 25.24, 24.93, 20.99, 19.58. **HRMS** (ESI) *m/z* calculated for C<sub>30</sub>H<sub>37</sub>NO<sub>5</sub>Na [M+Na]<sup>+</sup> 514.2564, found 514.2563.

**1-cyclohexyl-4-((3a*R*,6*R*,6a*S*)-6-((*R*)-2,2-dimethyl-1,3-dioxolan-4-yl)-2,2-dimethyltetrahydrofuro[3,4-*d*][1,3]dioxol-4-yl)-1*H*-indole (3n)**

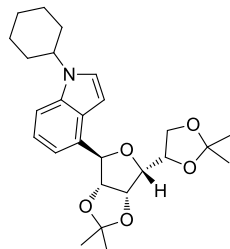

61.8 mg, 70% yield. Light yellow oil.

**<sup>1</sup>H NMR** (400 MHz, CDCl<sub>3</sub>) δ 7.32 (d, *J* = 8.3 Hz, 1H), 7.27-7.25 (m, 1H), 7.18 (t, *J* = 7.8 Hz, 1H), 7.04 (d, *J* = 7.2 Hz, 1H), 6.62 (d, *J* = 3.3 Hz, 1H), 5.53 (s, 1H), 5.16 (d, *J* = 5.9 Hz, 1H), 4.75 (dd, *J* = 6.1, 3.6 Hz, 1H), 4.57-4.52 (m, 1H), 4.30-4.19 (m, 3H), 4.11 (dd, *J* = 7.8, 3.7 Hz, 1H), 2.15-2.12 (m, 2H), 1.97-1.92 (m, 2H), 1.82-1.70 (m, 4H), 1.63 (s, 3H), 1.56-1.48 (m, 2H), 1.45 (s, 3H), 1.41-1.39 (m, 6H), 1.35-1.24 (m, *J* = 12.7, 6.4 Hz, 1H). **<sup>13</sup>C NMR** (101 MHz, CDCl<sub>3</sub>) δ 135.71, 130.36, 125.36, 124.19, 120.93, 114.92, 112.73, 109.17, 109.03, 99.37, 86.76, 84.91, 81.73, 81.10, 73.69, 67.15, 55.25, 33.63, 33.49, 26.93, 26.34, 25.93, 25.59, 25.25, 24.97. **HRMS** (ESI) *m/z* calculated for C<sub>26</sub>H<sub>35</sub>NO<sub>5</sub>Na [M+Na]<sup>+</sup> 264.2407, found 264.2406.

**4-((3a*R*,6*R*,6a*S*)-6-((*R*)-2,2-dimethyl-1,3-dioxolan-4-yl)-2,2-dimethyltetrahydrofuro[3,4-*d*][1,3]dioxol-4-yl)-1-(1,2,3,4-tetrahydronaphthalen-2-yl)-1*H*-indole (3o)**

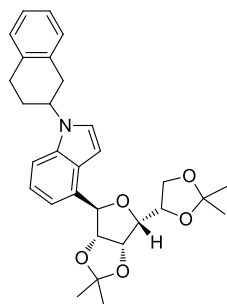

60.7 mg, 62% yield. Light yellow crystal.

**<sup>1</sup>H NMR** (400 MHz, CDCl<sub>3</sub>) δ 7.35 (d, *J* = 8.3 Hz, 1H), 7.24-7.16 (m, 5H), 7.15-7.06 (m, 2H), 6.65 (t, *J* = 3.6 Hz, 1H), 5.55 (s, 1H), 5.17 (d, *J* = 6.0 Hz, 1H), 4.81-4.75 (m, 2H), 4.58-4.53 (m, 1H), 4.31-4.20 (m, 2H), 4.13-4.10 (m, 1H), 3.38-3.31 (m, 1H), 3.24-3.11 (m, 1H), 3.10-2.91 (m, 2H), 2.35-2.28 (m, 2H), 1.63 (s, 3H), 1.46 (s, 3H), 1.41-1.39 (m, 6H). **<sup>13</sup>C NMR** (101 MHz, CDCl<sub>3</sub>) δ 135.92, 135.30, 135.27, 134.24, 130.54, 129.09, 128.88, 126.42, 126.40, 126.16, 126.12, 125.53, 124.43, 124.29, 121.25, 121.24, 115.19, 112.76, 109.17, 109.03, 109.00, 99.93, 99.87, 86.74, 84.85, 81.72, 81.09, 73.67, 67.12, 51.82, 51.71, 36.27, 35.98, 29.45, 29.43, 28.68, 28.43, 26.93, 26.34, 25.23, 24.96. **HRMS** (ESI) *m/z* calculated for C<sub>30</sub>H<sub>35</sub>NO<sub>5</sub>Na [M+Na]<sup>+</sup> 512.2407, found 512.2406.

**4-((3a*R*,4*R*,6*R*,6a*S*)-6-((*R*)-2,2-dimethyl-1,3-dioxolan-4-yl)-2,2-dimethyltetrahydrofuro[3,4-*d*][1,3]dioxol-4-yl)-1-(1,4-dioxaspiro[4.5]decan-8-yl)-1*H*-indole (3p)**

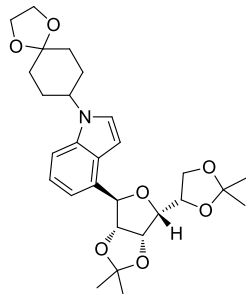

63.9 mg, 64% yield. Light yellow oil.

**<sup>1</sup>H NMR** (400 MHz, CDCl<sub>3</sub>) δ 7.34 (d, *J* = 8.3 Hz, 1H), 7.28 (d, *J* = 3.3 Hz, 1H), 7.19 (t, *J* = 7.8 Hz, 1H), 7.05 (d, *J* = 7.2 Hz, 1H), 6.63 (d, *J* = 3.2 Hz, 1H), 5.53 (s, 1H), 5.16-5.15 (m, 1H), 4.75 (dd, *J* = 6.1, 3.6 Hz, 1H), 4.57-4.52 (m, 1H), 4.34-4.27 (m, 2H), 4.24-4.20 (m, 1H), 4.11 (dd, *J* = 7.8, 3.7 Hz, 1H), 4.01 (s, 4H), 2.15-2.08 (m, 4H), 1.96-1.91 (m, 2H), 1.85-1.77 (m, 2H), 1.63 (s, 3H), 1.45 (s, 3H), 1.41-1.39 (m, 6H). **<sup>13</sup>C NMR** (101 MHz, CDCl<sub>3</sub>) δ 135.77, 130.43, 125.40, 124.30, 121.08, 115.02, 112.74, 109.15, 108.95, 107.62, 99.62, 86.73, 84.87, 81.70, 81.07, 73.65, 67.11, 64.50, 64.39, 53.97, 34.08, 34.06, 30.25, 30.13, 26.90, 26.32, 25.21, 24.96. **HRMS** (ESI) *m/z* calculated for C<sub>28</sub>H<sub>37</sub>NO<sub>7</sub> [M+Na]<sup>+</sup> 522.2462 found 522.2460.

**1-((1R,3R,5R,7R)-adamantan-2-yl)-4-((3aR,4R,6R,6aS)-6-((R)-2,2-dimethyl-1,3-dioxolan-4-yl)-2,2-dimethyltetrahydrofuro[3,4-d][1,3]dioxol-4-yl)-1H-indole (3p)**

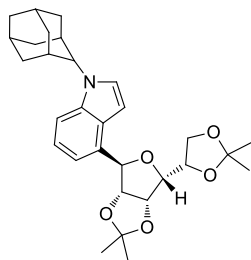

56.2 mg, 57% yield. White crystal.

**<sup>1</sup>H NMR** (400 MHz, CDCl<sub>3</sub>) δ 7.59 (d, *J* = 3.3 Hz, 1H), 7.25 (d, *J* = 8.0 Hz, 1H), 7.16 (t, *J* = 7.7 Hz, 1H), 7.05 (d, *J* = 7.2 Hz, 1H), 6.61 (d, *J* = 3.2 Hz, 1H), 5.54 (s, 1H), 5.18 (d, *J* = 6.1 Hz, 1H), 4.76 (dd, *J* = 6.0, 3.6 Hz, 1H), 4.57-4.53 (m, 2H), 4.31-4.20 (m, 2H), 4.12 (dd, *J* = 7.8, 3.6 Hz, 1H), 2.54 (s, 2H), 2.15 (d, *J* = 13.3 Hz, 1H), 2.04-1.96 (m, 7H), 1.83 (s, 2H), 1.78-1.65 (m, 2H), 1.63 (s, 3H), 1.45 (s, 3H), 1.41-1.39 (m, 6H). **<sup>13</sup>C NMR** (101 MHz, CDCl<sub>3</sub>) δ 136.51, 130.25, 126.10, 125.59, 120.84, 115.02, 112.72, 110.20, 109.16, 98.79, 86.80, 84.89, 81.72, 81.09, 73.69, 67.14, 61.01, 38.50, 38.27, 37.58, 32.50, 32.33, 32.16, 32.12, 27.72, 27.23, 26.92, 26.34, 25.24, 24.96. **HRMS** (ESI) *m/z* calculated for C<sub>30</sub>H<sub>39</sub>NO<sub>5</sub>Na [M+Na]<sup>+</sup> 516.2720, found 516.2718.

**1-(tert-butyl)-4-((2R,3R,4R,5R,6R)-3,4,5-trimethoxy-6-(methoxymethyl)tetrahydro-2H-pyran-2-yl)-1H-indole (3r)**

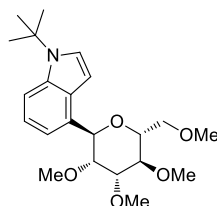

59.6 mg, 79% yield. Light yellow oil.

**<sup>1</sup>H NMR** (600 MHz, CDCl<sub>3</sub>) δ 7.59 (dd, *J* = 8.4, 0.7 Hz, 1H), 7.29 (d, *J* = 3.4 Hz, 1H), 7.10 (dd, *J* = 8.4, 7.3 Hz, 1H), 7.00 (d, *J* = 7.4 Hz, 1H), 6.84 (dd, *J* = 3.4, 0.9 Hz, 1H), 5.42 (d, *J* = 4.1 Hz, 1H), 4.30 (dd, *J* = 4.2, 3.2 Hz, 1H), 3.79-3.78 (m, 1H), 3.70 (t, *J* = 7.4 Hz, 1H), 3.65-3.60 (m, 2H), 3.59 (s, 3H), 3.56-3.54 (m, 1H), 3.50 (s, 3H), 3.38-3.37 (m, 6H), 1.72 (s, 9H). **<sup>13</sup>C NMR** (151 MHz, CDCl<sub>3</sub>) δ 135.31, 130.13, 128.99, 125.04, 120.01, 117.17, 113.29, 100.23, 80.37, 77.00, 76.46, 73.37, 73.06, 71.32, 59.45, 59.06, 58.15, 57.89, 55.67, 29.77. **HRMS** (ESI) *m/z* calculated for C<sub>22</sub>H<sub>33</sub>NO<sub>5</sub>Na [M+Na]<sup>+</sup> 414.2251, found 414.2248.

**1-(tert-butyl)-4-((2R,3R,4R,5R,6R)-3,4,5-tris(benzyloxy)-6-((benzyloxy)methyl)tetrahydro-2H-pyran-2-yl)-1H-indole (3s)**

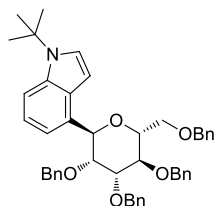

112.6 mg, 81% yield. Light yellow oil.



**<sup>1</sup>H NMR** (400 MHz, CDCl<sub>3</sub>) δ 7.54 (d, *J* = 8.5 Hz, 1H), 7.34-7.17 (m, 21H), 6.97 (t, *J* = 7.9 Hz, 1H), 6.81 (d, *J* = 3.4 Hz, 1H), 6.67 (d, *J* = 7.3 Hz, 1H), 5.44 (d, *J* = 4.3 Hz, 1H), 4.75 (d, *J* = 11.2 Hz, 1H), 4.67-4.62 (m, 3H), 4.58-4.43 (m, 5H), 4.11 (t, *J* = 7.2 Hz, 1H), 3.99 (dd, *J* = 7.5, 3.0 Hz, 1H), 3.86-3.77 (m, 2H), 3.73-3.69 (m, 1H), 1.70 (s, 9H). **<sup>13</sup>C NMR** (101 MHz, CDCl<sub>3</sub>) δ 138.58, 138.52, 135.29, 130.27, 128.88, 128.31, 128.23, 128.17, 128.13, 127.98, 127.72, 127.69, 127.57, 127.42, 127.35, 127.31, 124.95, 120.03, 117.34, 113.17, 100.51, 78.20, 75.50, 74.97, 74.24, 73.89, 73.70, 73.19, 72.47, 71.85, 69.20, 55.63, 29.80. **HRMS** (ESI) *m/z* calculated for C<sub>46</sub>H<sub>49</sub>NO<sub>5</sub>Na [M+Na]<sup>+</sup> 718.3503, found 718.3500.

**1-(*tert*-butyl)-4-((2*R*,3*R*,4*R*,5*R*,6*R*)-3,4,5-tris(allyloxy)-6-((allyloxy)methyl)tetrahydro-2*H*-pyran-2-yl)-1*H*-indole (3t)**

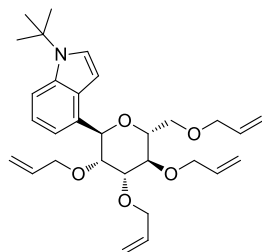

84.2 mg, 85% yield. Light yellow oil.

**<sup>1</sup>H NMR** (400 MHz, CDCl<sub>3</sub>) δ 7.58 (d, *J* = 8.4 Hz, 1H), 7.27 (d, *J* = 3.3 Hz, 1H), 7.07 (t, *J* = 7.8 Hz, 1H), 6.97 (d, *J* = 7.3 Hz, 1H), 6.87 (d, *J* = 3.2 Hz, 1H), 6.04-5.82 (m, 4H), 5.39-5.33 (m, 2H), 5.28-5.26 (m, 1H), 5.25-5.09 (m, 6H), 4.46 (dd, *J* = 4.1, 2.4 Hz, 1H), 4.29-4.20 (m, 3H), 4.15-3.91 (m, 7H), 3.71 (d, *J* = 4.2 Hz, 2H), 3.57 (q, *J* = 4.9 Hz, 1H), 1.71 (s, 9H). **<sup>13</sup>C NMR** (101 MHz, CDCl<sub>3</sub>) δ 135.27, 135.26, 135.23, 135.12, 134.98, 130.20, 128.88, 124.92, 119.90, 117.25, 117.04, 116.82, 116.47, 116.17, 113.18, 100.48, 78.42, 75.22, 74.63, 74.47, 73.56, 72.66, 72.18, 71.40, 71.28, 69.06, 55.59, 29.74. **HRMS** (ESI) *m/z* calculated for C<sub>30</sub>H<sub>41</sub>NO<sub>5</sub>Na [M+Na]<sup>+</sup> 518.2877, found 518.2874.

**1-(*tert*-butyl)-4-((3*aR*,4*R*,5*aR*,9*aR*,9*bR*)-2,2,8,8-tetramethylhexahydro-[1,3]dioxolo[4',5':4,5]pyran o[3,2-*d*][1,3]dioxin-4-yl)-1*H*-indole (3u)**

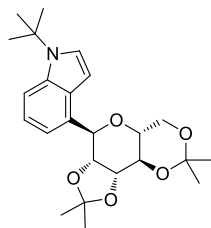

43.2 mg, 52% yield. Light yellow oil.

**<sup>1</sup>H NMR** (600 MHz, CDCl<sub>3</sub>) δ 7.64 (d, *J* = 8.4 Hz, 1H), 7.31 (d, *J* = 3.4 Hz, 1H), 7.15 (t, *J* = 7.8 Hz, 1H), 7.02 (d, *J* = 7.2 Hz, 1H), 6.57 (d, *J* = 3.3 Hz, 1H), 5.42 (d, *J* = 4.5 Hz, 1H), 4.86-4.84 (m, 1H), 4.42 (t, *J* = 6.9 Hz, 1H), 4.14 (dd, *J* = 10.6, 7.5 Hz, 1H), 3.83-3.81 (m, 2H), 3.54-3.50 (m, 1H), 1.73 (s, 9H), 1.61 (s, 3H), 1.56 (s, 3H), 1.42 (s, 3H), 1.38 (s, 3H). **<sup>13</sup>C NMR** (151 MHz, CDCl<sub>3</sub>) δ 135.38, 129.74, 129.01, 125.48, 120.15, 117.54, 113.91, 109.23, 99.45, 98.76, 76.13, 76.04, 75.14, 73.21, 64.26, 62.80, 55.86, 29.83, 29.06, 27.91, 25.56, 18.97. **HRMS** (ESI) *m/z* calculated for C<sub>24</sub>H<sub>33</sub>NO<sub>5</sub>Na [M+Na]<sup>+</sup> 438.2251, found 438.2249.

**1-(*tert*-butyl)-4-((2*R*,3*R*,4*R*,5*R*,6*R*)-3,4,5-tris(benzyloxy)-6-(((*tert*-butyldiphenylsilyl)oxy)methyl)tetrahydro-2*H*-pyran-2-yl)-1*H*-indole (3v)**

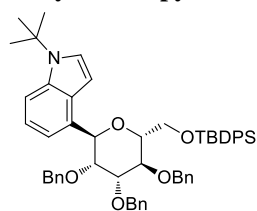

138.3 mg, 82% yield. Light yellow oil.

**<sup>1</sup>H NMR** (400 MHz, CDCl<sub>3</sub>) δ 7.77 (d, *J* = 6.5 Hz, 2H), 7.69-7.66 (m, 2H), 7.52 (d, *J* = 8.4 Hz, 1H), 7.42-7.20 (m, 21H), 7.10 (d, *J* = 3.4 Hz, 1H), 6.95 (t, *J* = 7.9 Hz, 1H), 6.70 (d, *J* = 3.3 Hz, 1H), 6.66 (d, *J* = 7.3 Hz, 1H), 5.37 (d, *J* = 4.6 Hz, 1H), 4.81-4.65 (m, 4H), 4.56-4.42 (m, 3H), 4.28 (t, *J* = 6.9 Hz, 1H), 4.09-4.02 (m, 2H), 3.93 (dd, *J* = 10.6, 4.6 Hz, 1H), 3.60 (q, *J* = 5.0 Hz, 1H), 1.66 (s, 9H), 1.06 (s, 9H). **<sup>13</sup>C NMR** (101 MHz, CDCl<sub>3</sub>) δ 138.69, 138.64, 135.88, 135.57, 135.21, 134.75, 133.81, 133.53, 130.57, 129.60, 129.45, 129.43, 128.83, 128.33, 128.27, 128.08, 127.73, 127.67, 127.58, 127.50, 127.41, 127.22, 124.92, 119.93, 117.42, 113.09, 100.49, 77.86, 75.56, 75.14, 74.96, 73.95, 73.70, 72.50, 71.88, 62.89, 55.55, 29.77, 26.83, 26.53, 19.27. **HRMS** (ESI) *m/z* calculated for C<sub>55</sub>H<sub>61</sub>NO<sub>5</sub>SiNa [M+Na]<sup>+</sup> 866.4211, found 866.4210.

**1-(*tert*-butyl)-4-((2*R*,3*R*,4*R*,5*R*,6*R*)-3,4,5-tris(allyloxy)-6-(((*tert*-butyldiphenylsilyl)oxy)methyl)tetrahydro-2*H*-pyran-2-yl)-1*H*-indole (3w)**

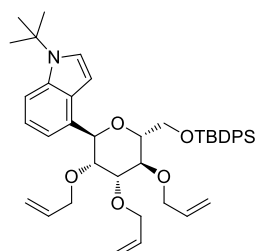

90.1 mg, 65% yield. Light yellow oil.

**<sup>1</sup>H NMR** (400 MHz, CDCl<sub>3</sub>) δ 7.75 (d, *J* = 6.1 Hz, 2H), 7.69-7.67 (m, 2H), 7.56 (d, *J* = 8.3 Hz, 1H), 7.43-7.38 (m, 6H), 7.14 (d, *J* = 3.4 Hz, 1H), 7.05 (t, *J* = 7.8 Hz, 1H), 6.98 (d, *J* = 7.3 Hz, 1H), 6.76 (d, *J* = 3.3 Hz, 1H), 6.03-5.94 (m, 1H), 5.92-5.76 (m, 2H), 5.37-5.29 (m, 2H), 5.24-5.04 (m, 5H), 4.44 (dd, *J* = 4.8, 3.1 Hz, 1H), 4.29-4.20 (m, 3H), 4.16-4.12 (m, 1H), 4.06-4.02 (m, 2H), 3.97-3.93 (m, 3H), 3.89 (dd, *J* = 10.5, 4.9 Hz, 1H), 3.59 (q, *J* = 5.2 Hz, 1H), 1.68 (s, 9H), 1.06 (s, 9H). **<sup>13</sup>C NMR** (101 MHz, CDCl<sub>3</sub>) δ 135.87, 135.57, 135.45, 135.33, 135.30, 135.20, 133.92, 133.65, 130.76, 129.41, 128.91, 127.55, 127.47, 124.93, 119.91, 117.48, 116.95, 116.70, 116.31, 113.13, 100.58, 78.18, 75.20, 75.03, 74.81, 74.22, 72.47, 71.60, 71.15, 63.02, 55.58, 29.80, 26.85, 19.29. **HRMS** (ESI) *m/z* calculated for C<sub>43</sub>H<sub>55</sub>NO<sub>5</sub>SiNa [M+Na]<sup>+</sup> 716.3742, found 716.3740.

**1-(*tert*-butyl)-4-((3*aS*,4*S*,6*R*,6*aR*)-6-(methoxymethyl)-2,2-dimethyltetrahydrofuro[3,4-*d*][1,3]dioxo  
l-4-yl)-1*H*-indole (3x)**

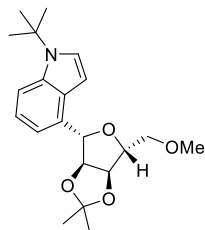

50.3 mg, 70% yield. Light yellow oil.

**<sup>1</sup>H NMR** (600 MHz, CDCl<sub>3</sub>) δ 7.58 (d, *J* = 8.2 Hz, 1H), 7.29 (d, *J* = 3.4 Hz, 1H), 7.18-7.12 (m, 2H), 6.63 (dt, *J* = 3.4, 0.9 Hz, 1H), 5.27 (d, *J* = 4.6 Hz, 1H), 4.77-4.75 (m, 1H), 4.70 (dd, *J* = 6.9, 4.9 Hz, 1H), 4.26 (q, *J* = 4.9 Hz, 1H), 3.72-3.67 (m, 2H), 3.46 (d, *J* = 0.6 Hz, 3H), 1.72 (s, 9H), 1.66 (s, 3H), 1.34 (d, *J* = 0.9 Hz, 3H). **<sup>13</sup>C NMR** (151 MHz, CDCl<sub>3</sub>) δ 135.05, 131.42, 127.44, 125.16, 120.42, 115.78, 114.75, 113.08, 98.59, 86.32, 85.45, 83.14, 82.06, 72.86, 59.49, 55.75, 29.80, 27.52, 25.49. **HRMS** (ESI) *m/z* calculated for C<sub>21</sub>H<sub>29</sub>NO<sub>4</sub>Na [M+Na]<sup>+</sup> 382.1989, found 382.1988.

**4-((3*aS*,4*S*,6*R*,6*aR*)-6-((benzyloxy)methyl)-2,2-dimethyltetrahydrofuro[3,4-*d*][1,3]dioxol-4-yl)-1-(*t*  
*ert*-butyl)-1*H*-indole (3y)**

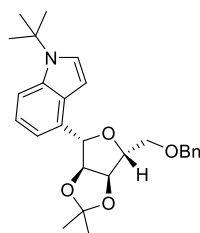

54.8 mg, 63% yield. Light yellow oil.

**<sup>1</sup>H NMR** (400 MHz, CDCl<sub>3</sub>) δ 7.58 (d, *J* = 8.3 Hz, 1H), 7.39 – 7.10 (m, 8H), 6.65 (d, *J* = 3.4 Hz, 1H), 5.28 (d, *J* = 3.3 Hz, 1H), 4.78-4.74 (m, 2H), 4.64 (d, *J* = 3.5 Hz, 2H), 4.31 (q, *J* = 4.2 Hz, 1H), 3.78 (d, *J* = 4.4 Hz, 2H), 1.71 (s, 9H), 1.66 (s, 3H), 1.33 (s, 3H). **<sup>13</sup>C NMR** (101 MHz, CDCl<sub>3</sub>) δ 138.12, 135.03, 131.50, 128.28, 127.73, 127.52, 127.40, 125.10, 120.39, 115.81, 114.59, 113.05, 98.73, 86.35, 85.53, 83.39, 81.89, 73.53, 70.21, 55.70, 29.77, 27.54, 25.51. **HRMS** (ESI) *m/z* calculated for C<sub>27</sub>H<sub>33</sub>NO<sub>4</sub>Na [M+Na]<sup>+</sup> 458.2302, found 458.2299.

**1-(*tert*-butyl)-4-((3*aS*,4*S*,6*R*,6*aR*)-6-((methoxymethoxy)methyl)-2,2-dimethyltetrahydrofuro[3,4-*d*]  
[1,3]dioxol-4-yl)-1*H*-indole (3z)**

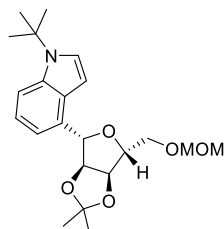

59.2 mg, 76% yield. Light yellow oil.

**<sup>1</sup>H NMR** (400 MHz, CDCl<sub>3</sub>) δ 7.58 (d, *J* = 8.1 Hz, 1H), 7.29 (d, *J* = 3.4 Hz, 1H), 7.18-7.11 (m, 2H), 6.63 (d, *J* = 3.3 Hz, 1H), 5.29 (d, *J* = 4.5 Hz, 1H), 4.78-4.70 (m, 4H), 4.29 (q, *J* = 4.8 Hz, 1H), 3.84 (d, *J* = 4.8 Hz, 2H), 3.41 (s, 3H), 1.72 (s, 9H), 1.67 (s, 3H), 1.34 (s, 3H). **<sup>13</sup>C NMR** (101 MHz, CDCl<sub>3</sub>) δ

135.02, 131.41, 127.39, 125.11, 120.41, 115.62, 114.72, 113.05, 98.58, 96.75, 86.38, 85.35, 83.12, 82.04, 67.75, 55.73, 55.31, 29.77, 27.51, 25.48. **HRMS** (ESI)  $m/z$  calculated for  $C_{22}H_{31}NO_5Na$   $[M+Na]^+$  412.2094, found 412.2092.

**4-((3*aS*,4*S*,6*R*,6*aR*)-6-((allyloxy)methyl)-2,2-dimethyltetrahydrofuro[3,4-*d*][1,3]dioxol-4-yl)-1-(*tert*-butyl)-1*H*-indole (3aa)**

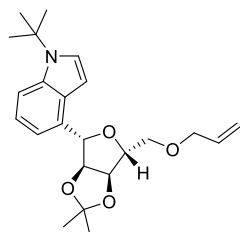

55.5 mg, 72% yield. Light yellow oil.

**<sup>1</sup>H NMR** (600 MHz,  $CDCl_3$ )  $\delta$  7.58 (dd,  $J = 8.4, 1.6$  Hz, 1H), 7.29 (dd,  $J = 3.4, 1.7$  Hz, 1H), 7.18-7.11 (m, 2H), 6.66-6.65 (m, 1H), 5.97-5.93 (m, 1H), 5.33-5.21 (m, 2H), 5.20 (dt,  $J = 10.4, 1.5$  Hz, 1H), 4.78-4.73 (m, 2H), 4.29-4.27 (m, 1H), 4.12-4.10 (m, 2H), 3.76-3.74 (m, 2H), 1.72 (s, 9H), 1.66 (s, 3H), 1.34 (s, 3H). **<sup>13</sup>C NMR** (151 MHz,  $CDCl_3$ )  $\delta$  135.01, 134.62, 131.46, 127.40, 125.05, 120.36, 117.02, 115.79, 114.56, 113.01, 98.67, 86.30, 85.47, 83.32, 81.89, 72.48, 70.11, 55.66, 29.74, 27.52, 25.49. **HRMS** (ESI)  $m/z$  calculated for  $C_{23}H_{31}NO_4Na$   $[M+Na]^+$  408.2145, found 408.2144.

**1-(*tert*-butyl)-4-((3*aS*,4*S*,6*R*,6*aR*)-6-(((*tert*-butyldiphenylsilyl)oxy)methyl)-2,2-dimethyltetrahydrofuro[3,4-*d*][1,3]dioxol-4-yl)-1*H*-indole (3ab)**

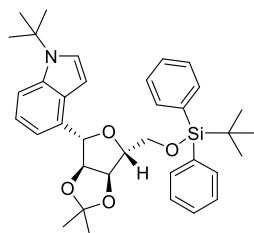

82.3 mg, 71% yield. Light yellow oil.

**<sup>1</sup>H NMR** (600 MHz,  $CDCl_3$ )  $\delta$  7.75-7.71 (m, 4H), 7.57 (d,  $J = 8.4$  Hz, 1H), 7.42-7.35 (m, 6H), 7.25-7.23 (m, 2H), 7.11-7.09 (m, 1H), 6.67 (d,  $J = 3.2$  Hz, 1H), 5.32 (d,  $J = 4.8$  Hz, 1H), 4.83 (dd,  $J = 6.7, 4.5$  Hz, 1H), 4.71 (dd,  $J = 6.7, 4.9$  Hz, 1H), 4.24 (q,  $J = 4.1$  Hz, 1H), 4.01-3.92 (m, 2H), 1.72 (s, 9H), 1.66 (s, 3H), 1.34 (s, 3H), 1.09 (s, 9H). **<sup>13</sup>C NMR** (151 MHz,  $CDCl_3$ )  $\delta$  135.72, 135.70, 134.99, 133.40, 133.32, 131.89, 129.66, 129.61, 127.69, 127.67, 127.51, 125.07, 120.49, 115.49, 114.34, 112.87, 98.85, 86.57, 84.96, 84.50, 81.44, 63.99, 55.74, 29.83, 27.67, 26.88, 25.62, 19.30. **HRMS** (ESI)  $m/z$  calculated for  $C_{36}H_{45}NO_4SiNa$   $[M+Na]^+$  606.3010, found 606.3008.

**1-(*tert*-butyl)-4-((2*R*,3*R*,4*S*,5*R*,6*R*)-3,4,5-trimethoxy-6-methyltetrahydro-2*H*-pyran-2-yl)-1*H*-indole (3ac)**

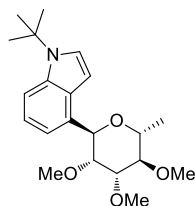

50.6 mg, 70% yield. Light yellow oil.

**<sup>1</sup>H NMR** (400 MHz, CDCl<sub>3</sub>) δ 7.60 (d, *J* = 8.4 Hz, 1H), 7.29 (d, *J* = 3.4 Hz, 1H), 7.10 (t, *J* = 7.9 Hz, 1H), 6.97 (d, *J* = 7.2 Hz, 1H), 6.83 (d, *J* = 3.4 Hz, 1H), 5.43 (d, *J* = 3.3 Hz, 1H), 4.36 (t, *J* = 3.3 Hz, 1H), 3.74 (dd, *J* = 8.1, 3.3 Hz, 1H), 3.59 (s, 3H), 3.51 (s, 3H), 3.48 (s, 3H), 3.42-3.40 (m, 1H), 3.30 (t, *J* = 7.9 Hz, 1H), 1.73 (s, 9H), 1.31 (d, *J* = 6.2 Hz, 3H). **<sup>13</sup>C NMR** (101 MHz, CDCl<sub>3</sub>) δ 135.28, 130.18, 129.07, 125.05, 119.97, 116.72, 113.26, 100.27, 82.19, 80.98, 77.20, 73.27, 69.80, 60.05, 58.34, 57.72, 55.68, 29.76, 17.74. **HRMS** (ESI) *m/z* calculated for C<sub>21</sub>H<sub>31</sub>NO<sub>4</sub>Na [M+Na]<sup>+</sup> 384.2145, found 384.2143.

**1-(*tert*-butyl)-4-((2*R*,3*R*,4*S*,5*R*,6*R*)-3,4,5-tris(benzyloxy)-6-methyltetrahydro-2*H*-pyran-2-yl)-1*H*-indole (3ad)**

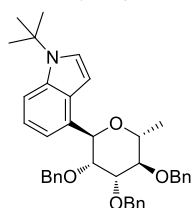

93.1 mg, 79% yield. Light yellow oil.

**<sup>1</sup>H NMR** (600 MHz, CDCl<sub>3</sub>) δ 7.53 (d, *J* = 8.4 Hz, 1H), 7.36-7.22 (m, 16H), 6.95-6.93 (m, 1H), 6.78 (dd, *J* = 3.3, 0.8 Hz, 1H), 6.56 (d, *J* = 7.3 Hz, 1H), 5.43 (d, *J* = 3.5 Hz, 1H), 4.85 (d, *J* = 11.1 Hz, 1H), 4.73-4.62 (m, 5H), 4.46 (t, *J* = 3.3 Hz, 1H), 3.95 (dd, *J* = 8.1, 3.0 Hz, 1H), 3.72 (t, *J* = 7.9 Hz, 1H), 3.53-3.48 (m, 1H), 1.69 (s, 9H), 1.36 (d, *J* = 6.3 Hz, 3H). **<sup>13</sup>C NMR** (151 MHz, CDCl<sub>3</sub>) δ 138.64, 138.59, 138.48, 135.22, 130.25, 128.88, 128.29, 128.22, 128.18, 128.04, 128.00, 127.68, 127.55, 127.42, 127.41, 124.92, 119.96, 116.80, 113.06, 100.39, 80.96, 78.90, 74.90, 74.41, 74.38, 72.41, 72.00, 70.30, 55.59, 29.75, 17.99. **HRMS** (ESI) *m/z* calculated for C<sub>39</sub>H<sub>43</sub>NO<sub>4</sub>Na [M+Na]<sup>+</sup> 612.3084, found 612.3083.

**(2*R*,3*S*,4*R*,5*R*)-2-(1-(*tert*-butyl)-6-chloro-1*H*-indol-4-yl)-5-((*R*)-1,2-dihydroxyethyl)tetrahydrofuran-3,4-diol (4a')**

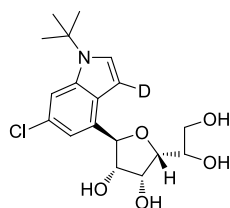

61.4 mg, 83% yield. White crystal.

**<sup>1</sup>H NMR** (600 MHz, CD<sub>3</sub>OD) δ 7.60 (s, 1H), 7.33 (d, *J* = 6.9 Hz, 1H), 7.11 (s, 1H), 5.14 (d, *J* = 8.1 Hz, 1H), 4.34 (t, *J* = 3.9 Hz, 1H), 4.24-4.20 (m, 2H), 4.08 (d, *J* = 7.0 Hz, 1H), 3.86 (d, *J* = 11.4 Hz, 1H), 3.71-3.68 (m, 1H), 1.65 (s, 9H). **<sup>13</sup>C NMR** (151 MHz, CD<sub>3</sub>OD) 136.43, 135.53, 127.84, 127.10, 126.81, 117.06, 113.09, 100.08, 82.71, 81.34, 79.88, 73.57, 71.58, 64.63, 56.77, 29.73. **HRMS** (ESI) *m/z* calculated for C<sub>18</sub>H<sub>23</sub>DCINO<sub>5</sub>Na [M+Na]<sup>+</sup> 393.1313, found 393.1302.

**(2*R*,3*S*,4*R*,5*R*)-2-(1-(tert-butyl)-6-(trifluoromethyl)-1*H*-indol-4-yl)-5-((*R*)-1,2-dihydroxyethyl)tetrahydrofuran-3,4-diol (4b')**

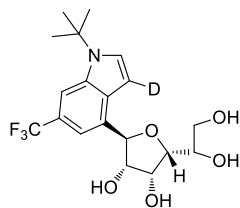

63.9 mg, 79% yield. White crystal.

**<sup>1</sup>H NMR** (600 MHz, CD<sub>3</sub>OD) δ 7.87 (s, 1H), 7.55 (d, *J* = 1.3 Hz, 1H), 7.36 (d, *J* = 1.3 Hz, 1H), 5.22 (d, *J* = 8.1 Hz, 1H), 4.39 (t, *J* = 3.9 Hz, 1H), 4.30-4.26 (m, 2H), 4.11 (s, 1H), 3.90-3.87 (m, 1H), 3.72 (dd, *J* = 12.0, 5.9 Hz, 1H), 1.72 (s, 9H). **<sup>13</sup>C NMR** (151 MHz, CD<sub>3</sub>OD) δ 135.04, 131.65, 129.15, 126.63 (q, *J* = 270.7 Hz), 122.99 (q, *J* = 31.2 Hz), 113.01, 110.59, 100.19, 82.85, 81.28, 79.73, 73.70, 71.74, 64.41, 57.17, 49.64, 29.82. **<sup>19</sup>F NMR** (376 MHz, CD<sub>3</sub>OD) δ -61.54. **HRMS** (ESI) *m/z* calculated for C<sub>19</sub>H<sub>23</sub>DF<sub>3</sub>NO<sub>5</sub>Na [M+Na]<sup>+</sup> 427.1577, found 427.1576.

**S9. NMR Spectroscopic Data**

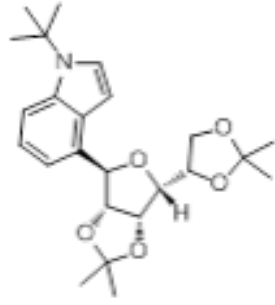

7.60  
7.60  
7.59  
7.59  
7.32  
7.32  
7.25  
7.17  
7.16  
7.16  
7.14  
7.14  
7.04  
7.03  
6.56  
6.56  
6.56  
6.55

5.53  
5.15  
5.15  
5.14  
5.14  
4.76  
4.75  
4.74  
4.56  
4.56  
4.55  
4.55  
4.55  
4.54  
4.54  
4.53  
4.30  
4.30  
4.29  
4.28  
4.24  
4.22  
4.22  
4.21  
4.13  
4.13  
4.12  
4.11

1.74  
1.63  
1.45  
1.41  
1.39

-0.00

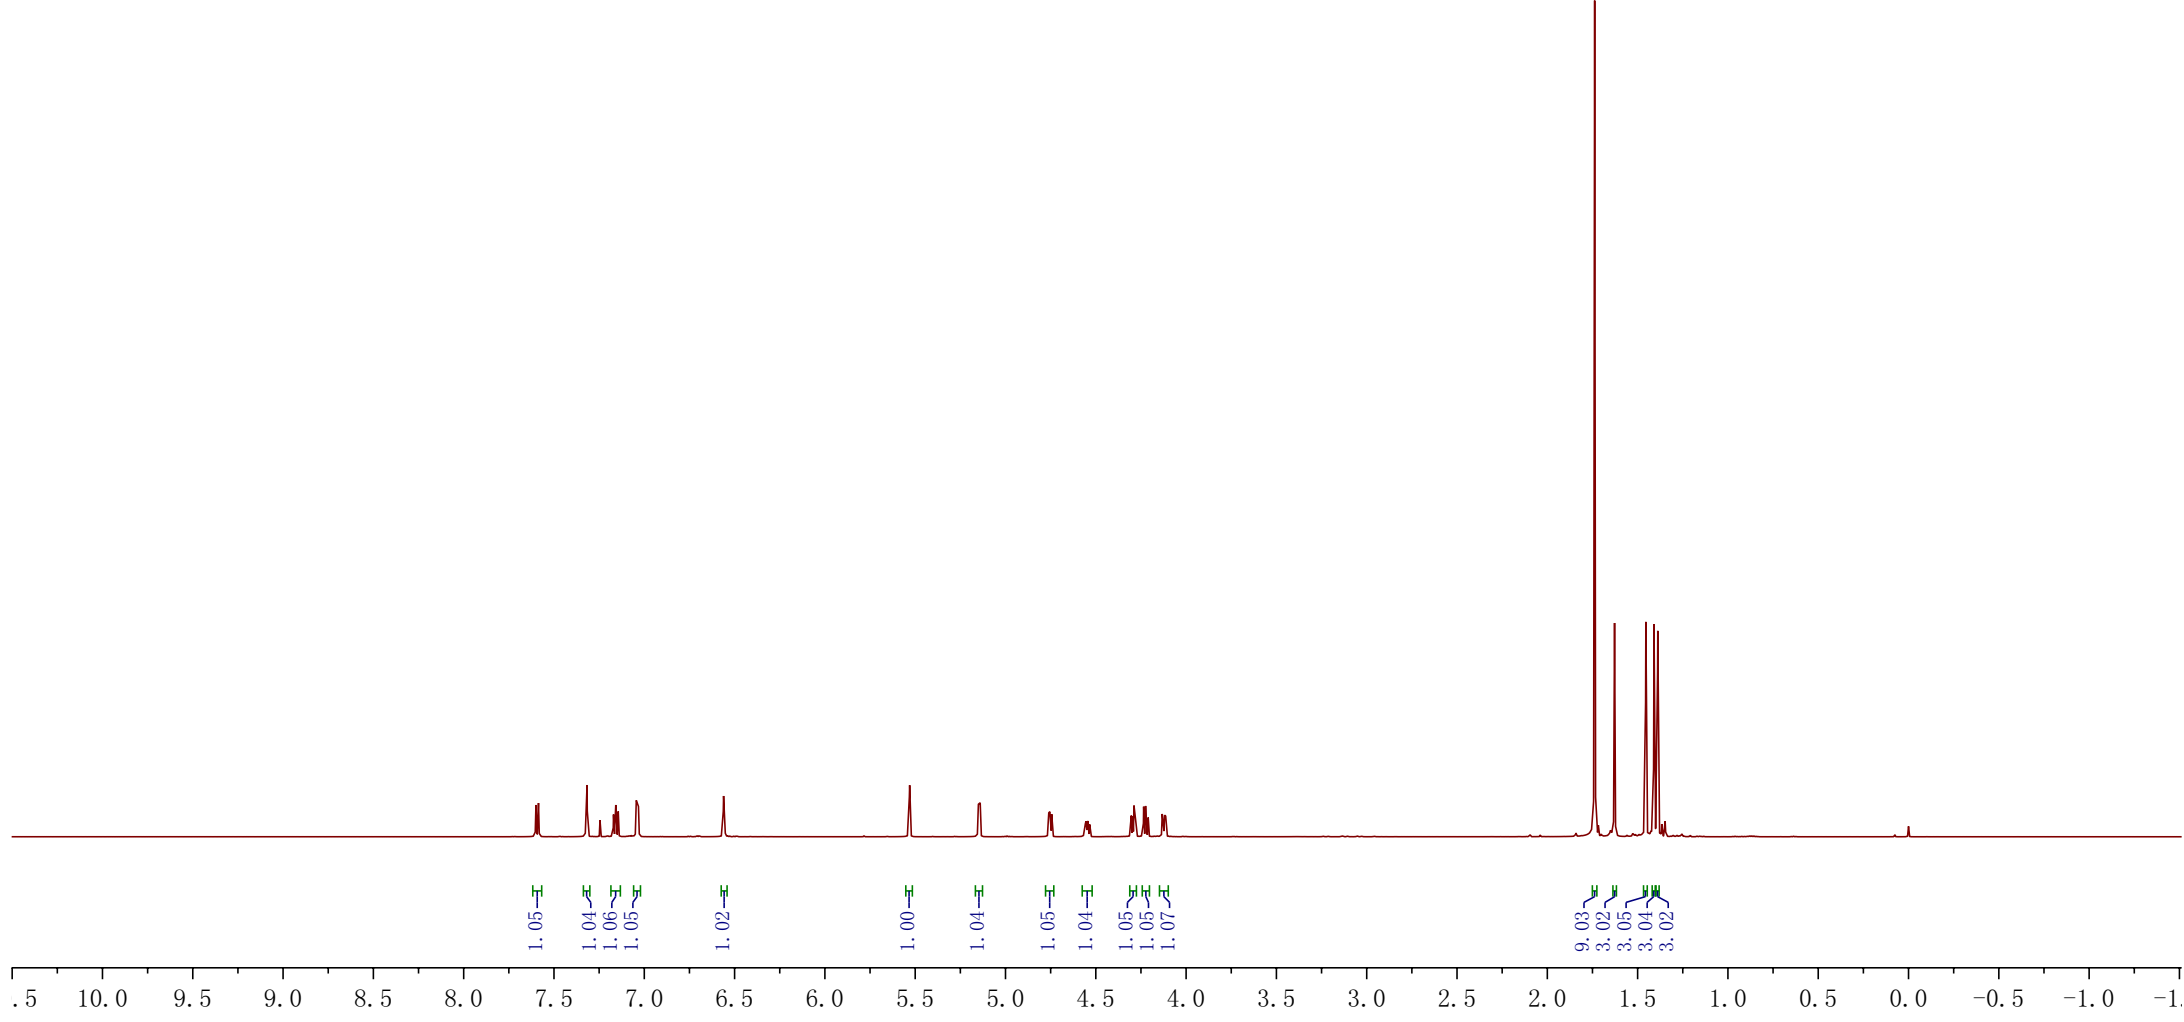

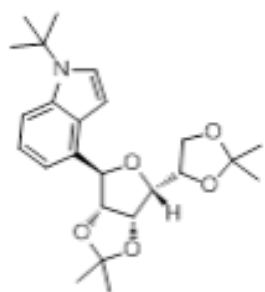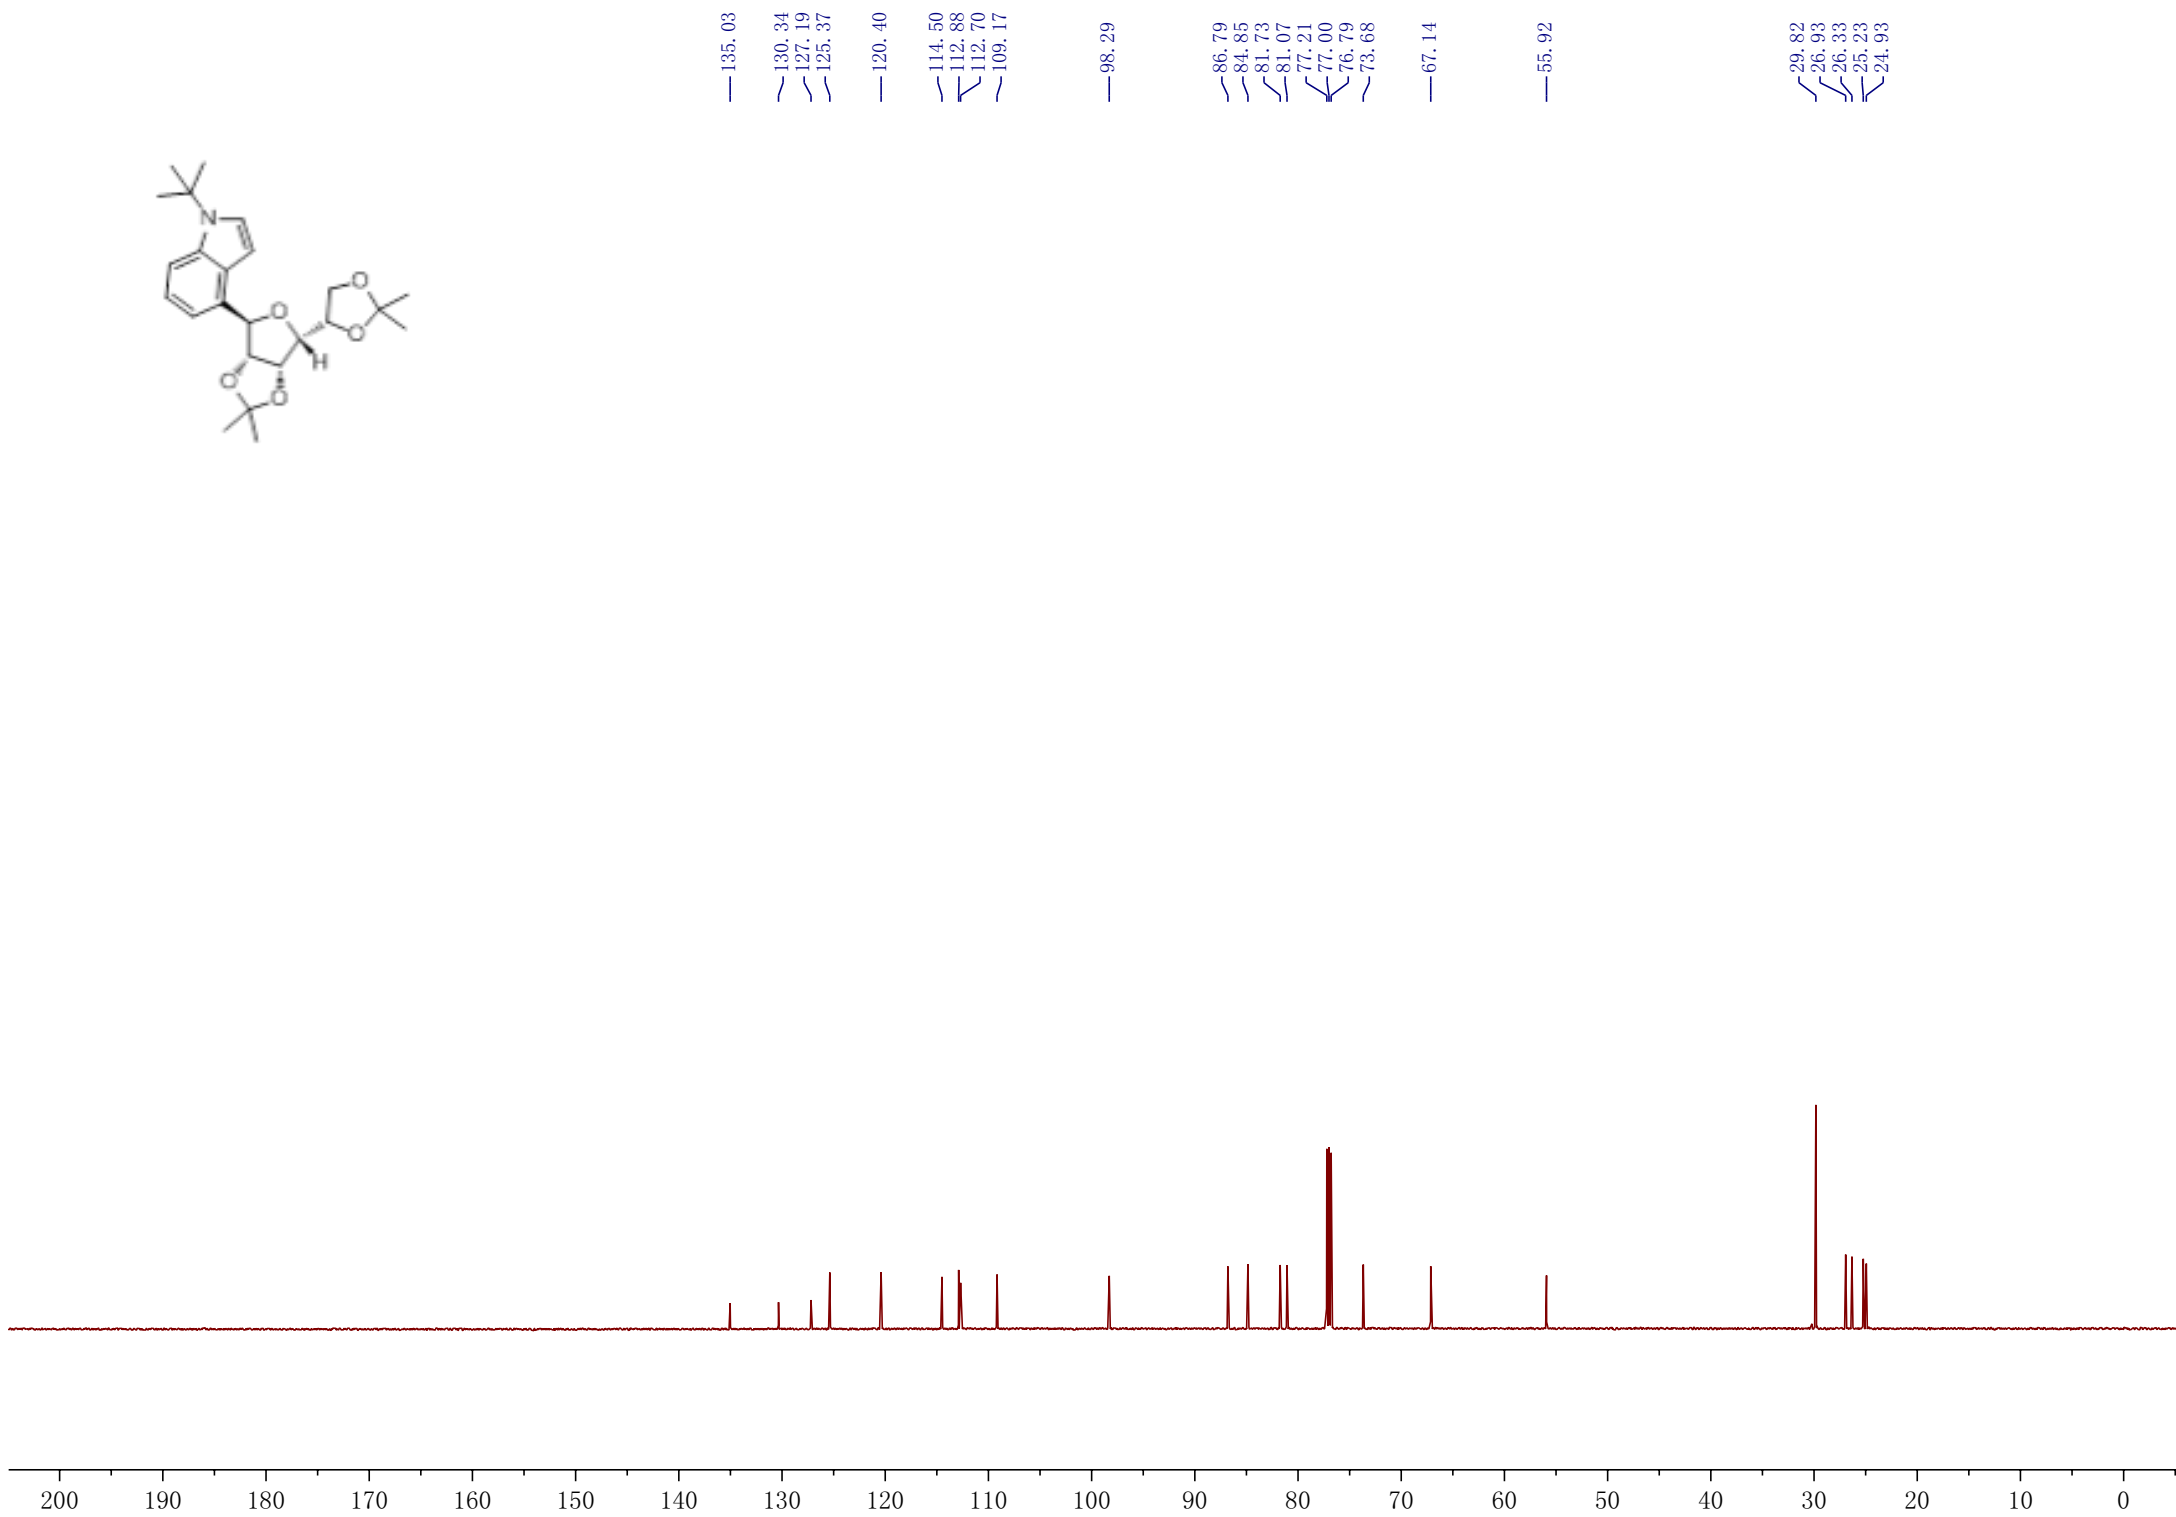



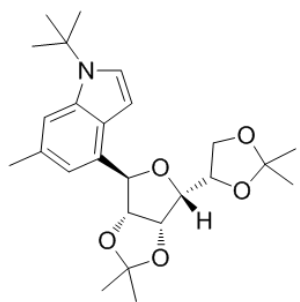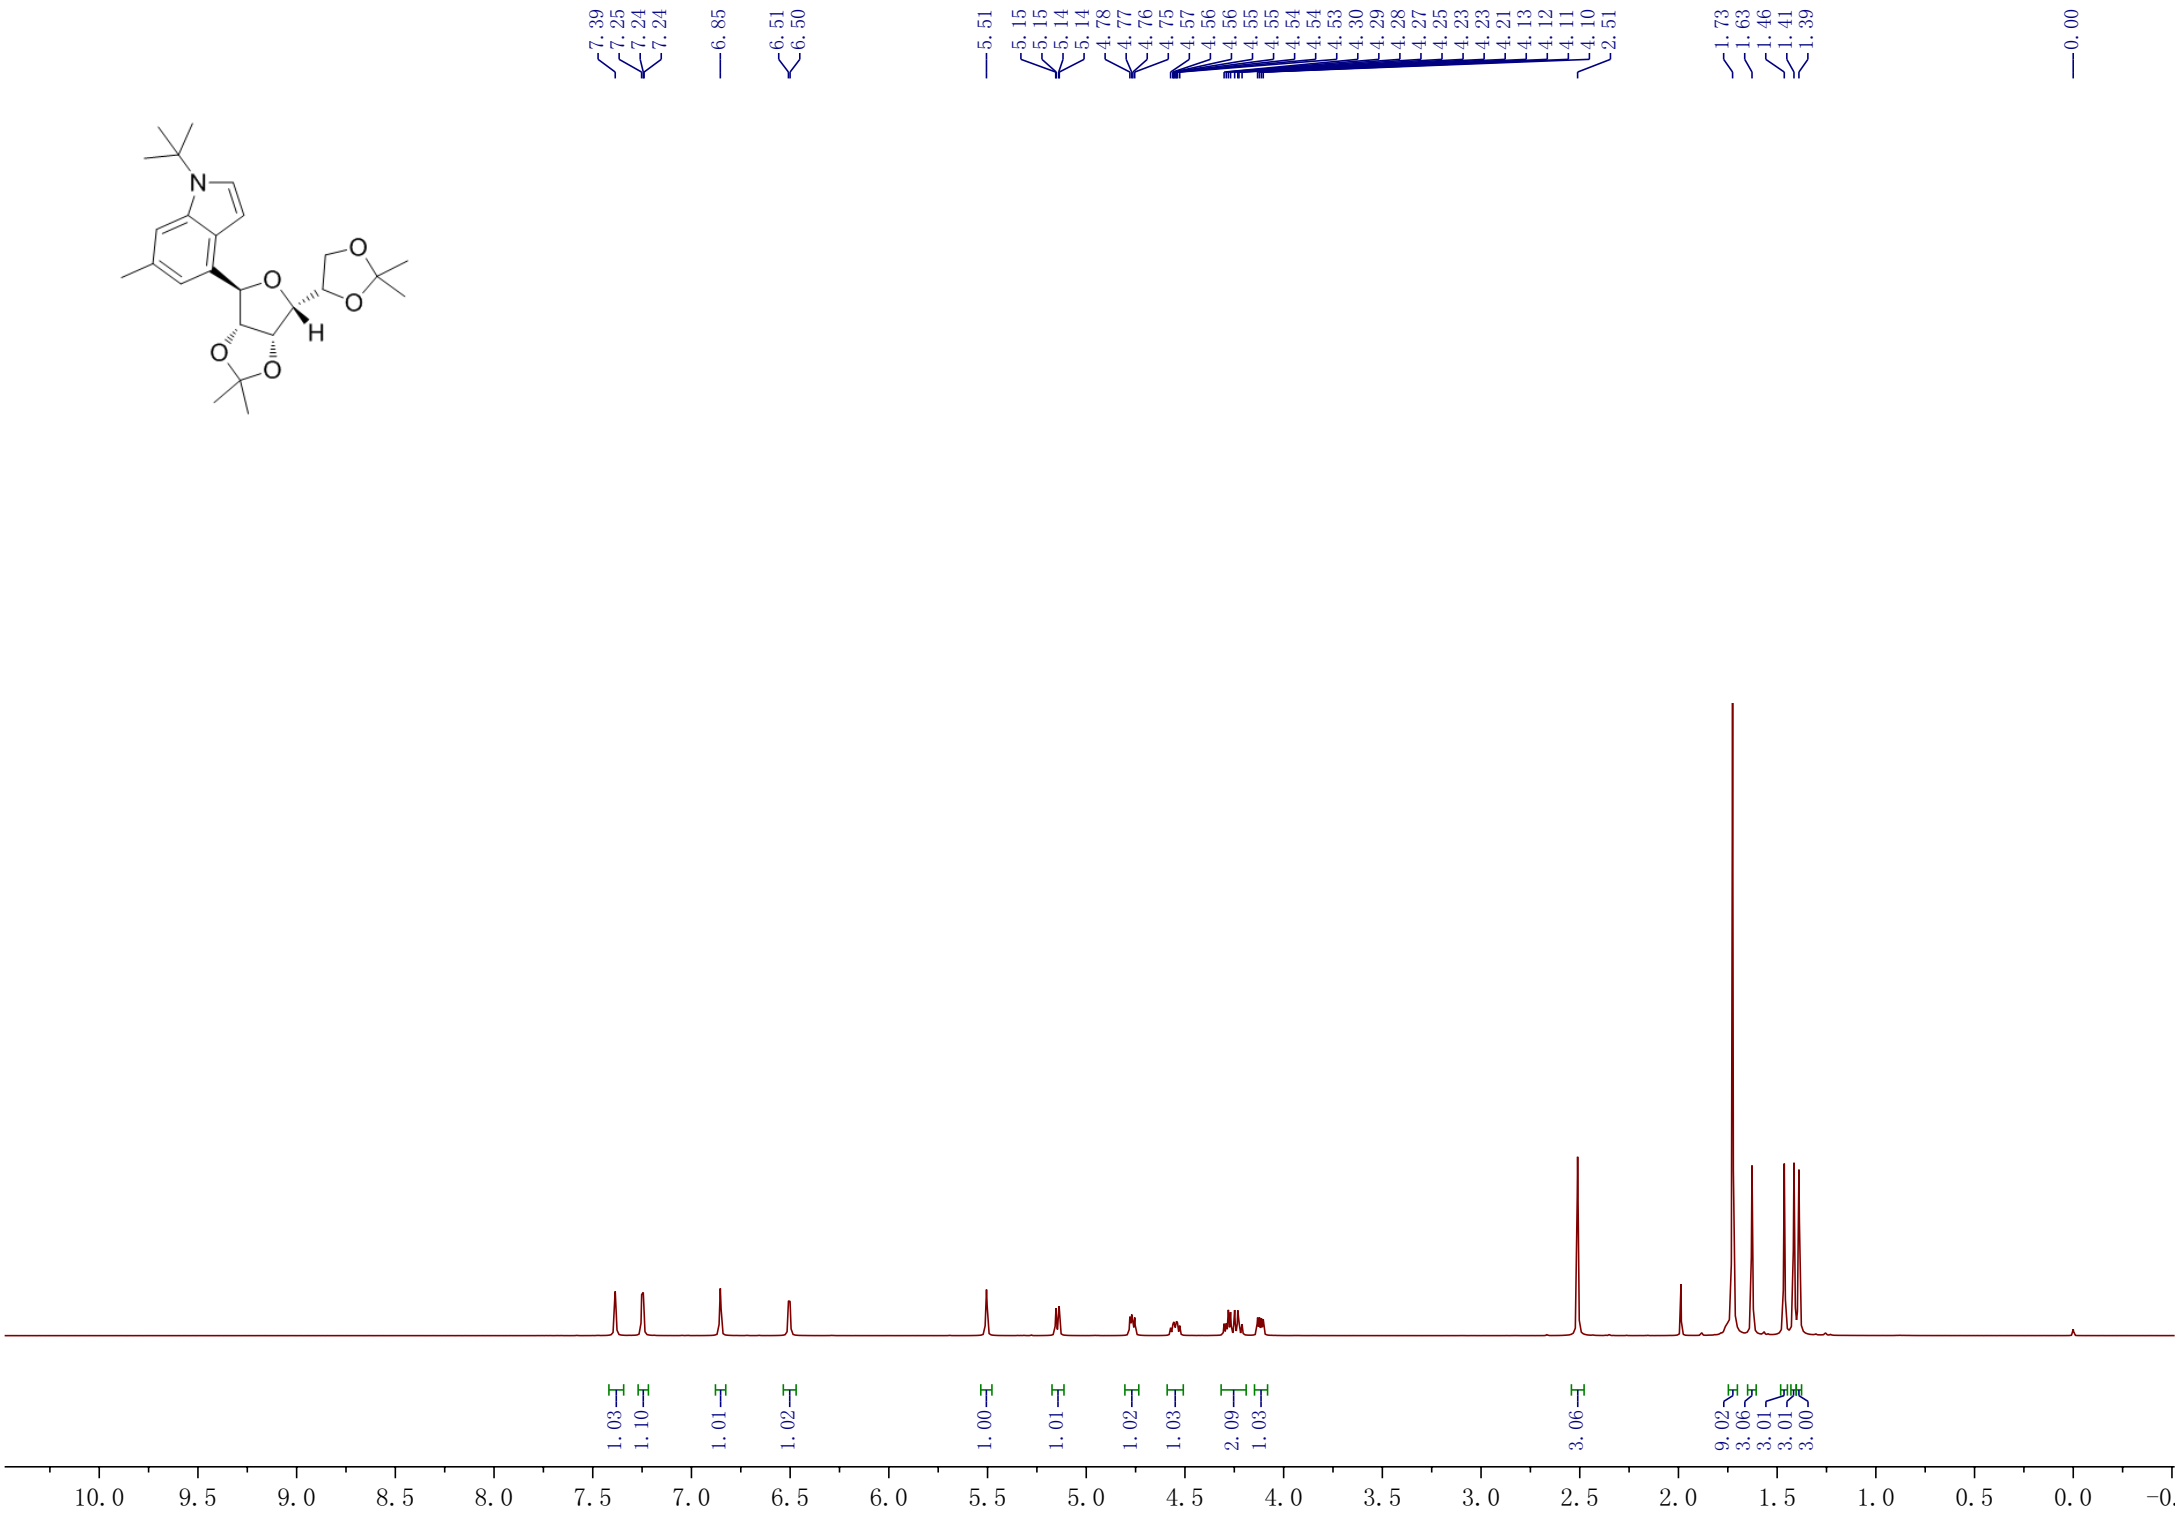

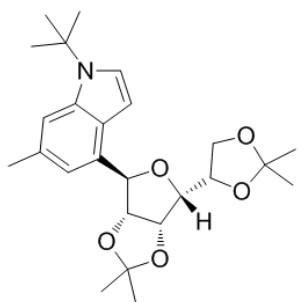

— 135.42  
— 129.95  
— 129.93  
— 125.05  
— 124.78

— 116.18  
— 112.82  
— 112.63  
— 109.11

— 98.07

— 86.73  
— 84.77  
— 81.71  
— 81.01  
— 77.32  
— 77.00  
— 76.68  
— 73.63

— 67.15

— 55.74

— 29.75  
— 26.86  
— 26.28  
— 25.17  
— 24.85  
— 22.40

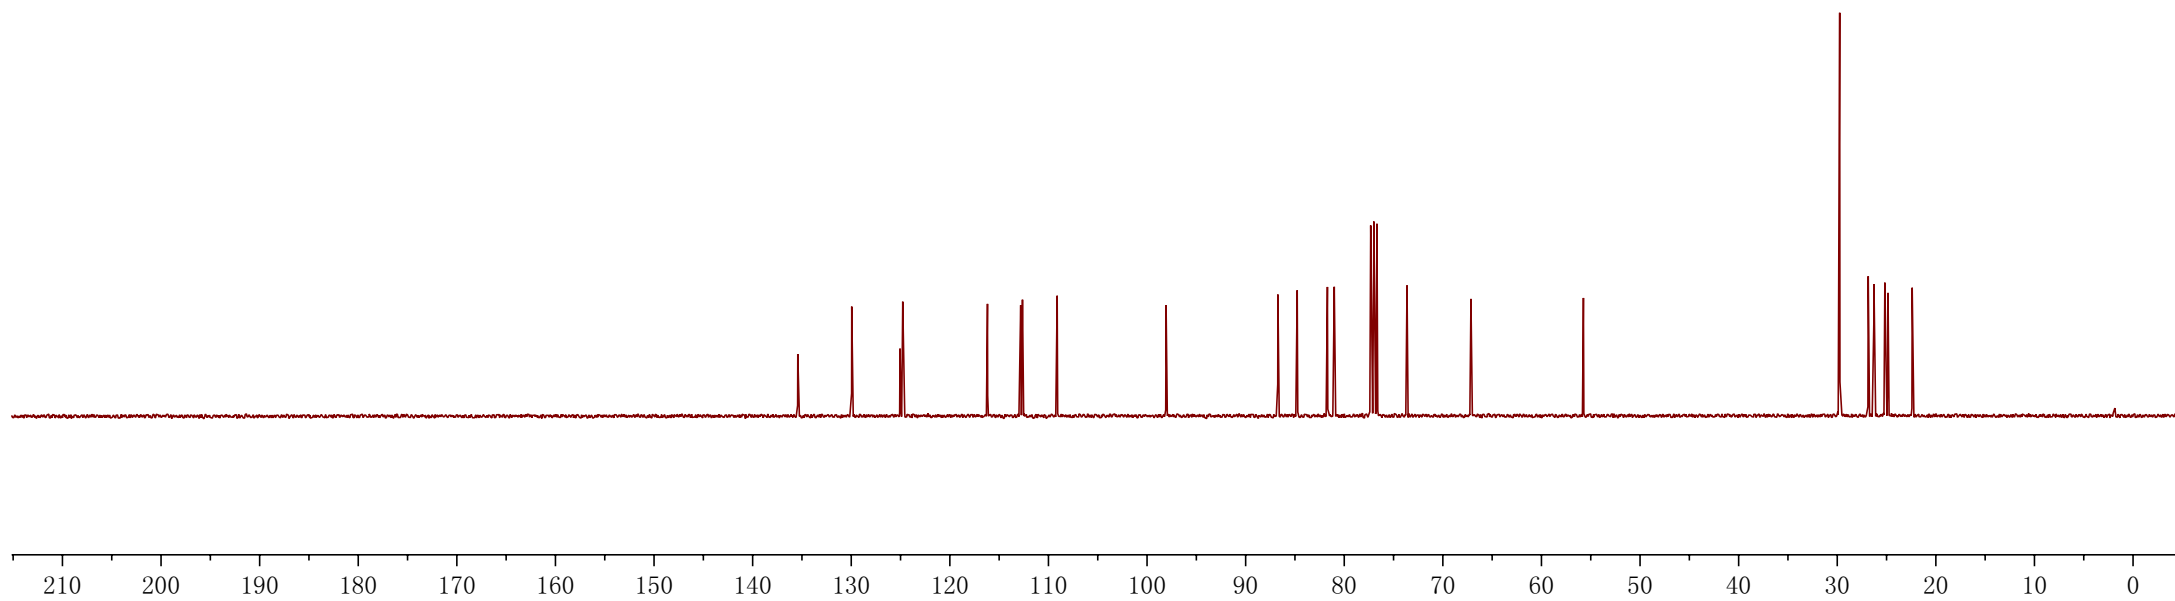

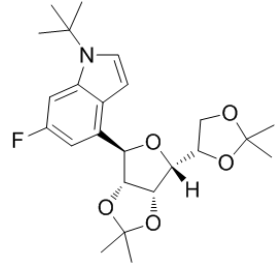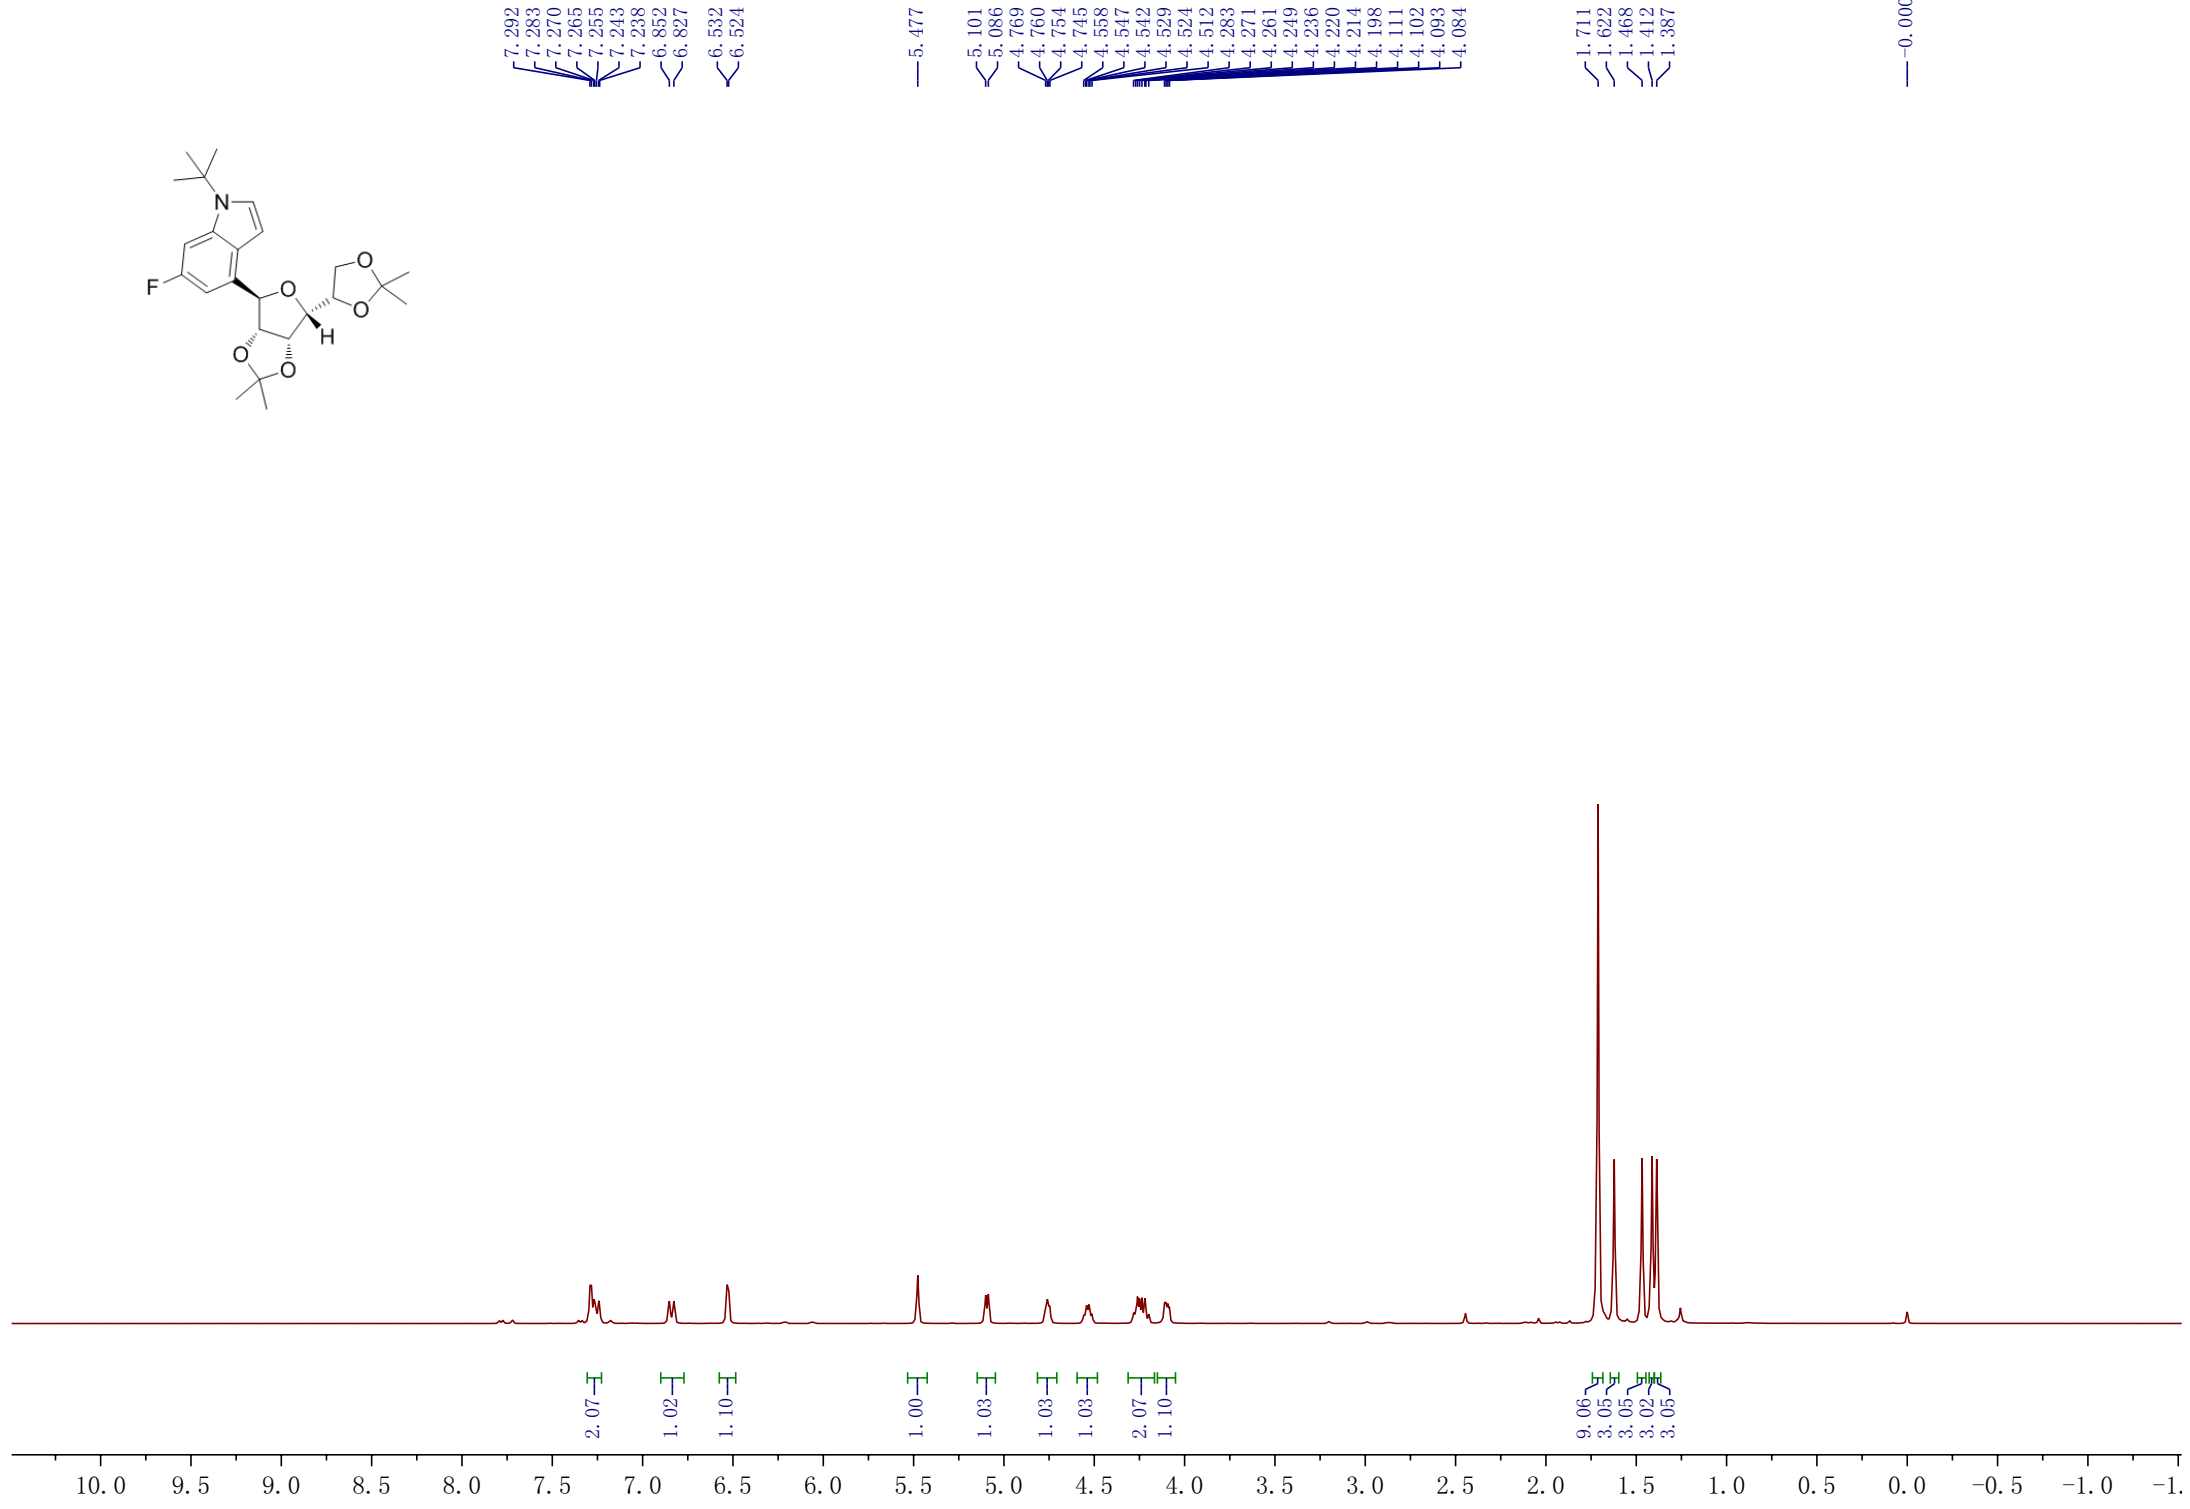

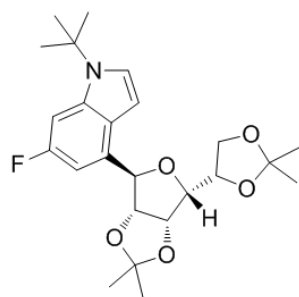

— 159.848  
— 157.503

— 134.791  
— 134.672  
— 131.925  
— 131.838  
— 125.615  
— 125.581  
— 123.431

— 112.916  
— 109.176

— 103.911  
— 103.650  
— 99.101  
— 98.832  
— 98.495

— 86.797  
— 84.600  
— 81.947  
— 81.034  
— 77.318  
— 77.000  
— 76.682  
— 73.607

— 67.044

— 56.012

— 29.628  
— 26.873  
— 26.355  
— 25.223  
— 24.964

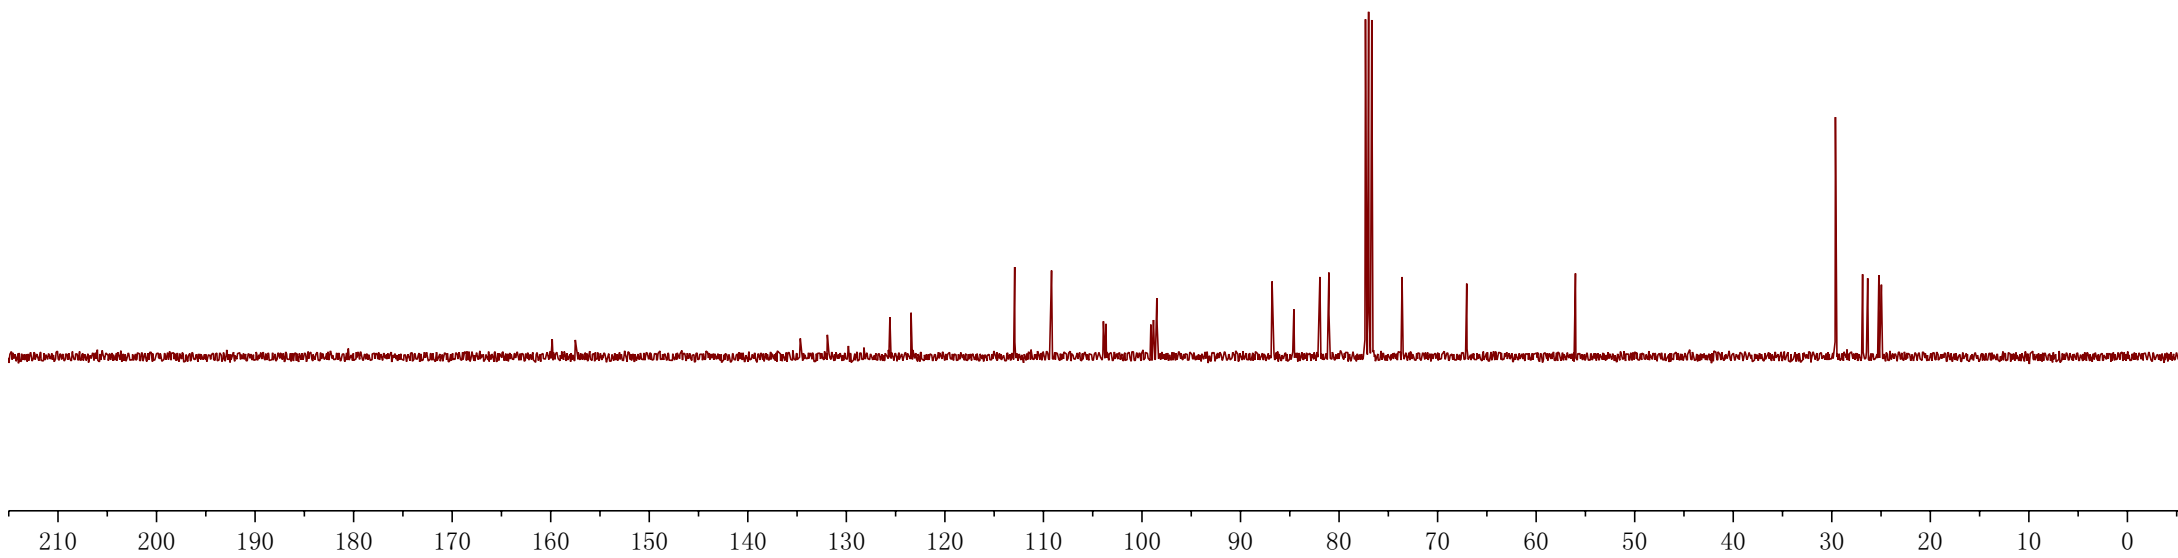

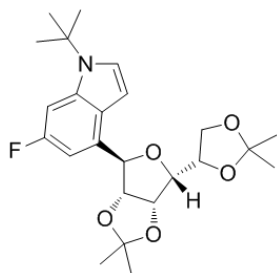

— 120.854

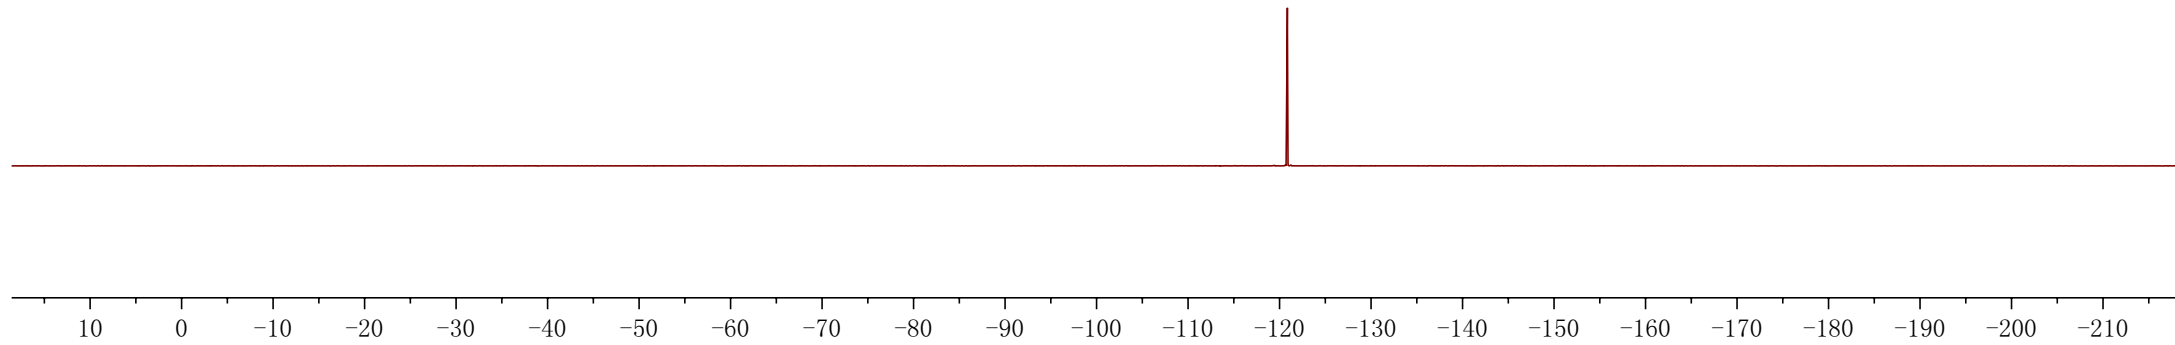

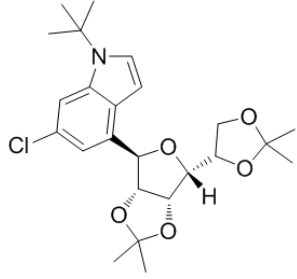

7.571  
7.567  
7.300  
7.291  
7.255  
6.998  
6.995  
6.991  
6.540  
6.532

5.465  
5.084  
5.081  
5.069  
5.066  
4.782  
4.773  
4.767  
4.758  
4.555  
4.543  
4.539  
4.536  
4.527  
4.524  
4.521  
4.509  
4.267  
4.255  
4.245  
4.234  
4.219  
4.212  
4.197  
4.105  
4.095  
4.086  
4.077

1.717  
1.622  
1.471  
1.413  
1.387

0.000

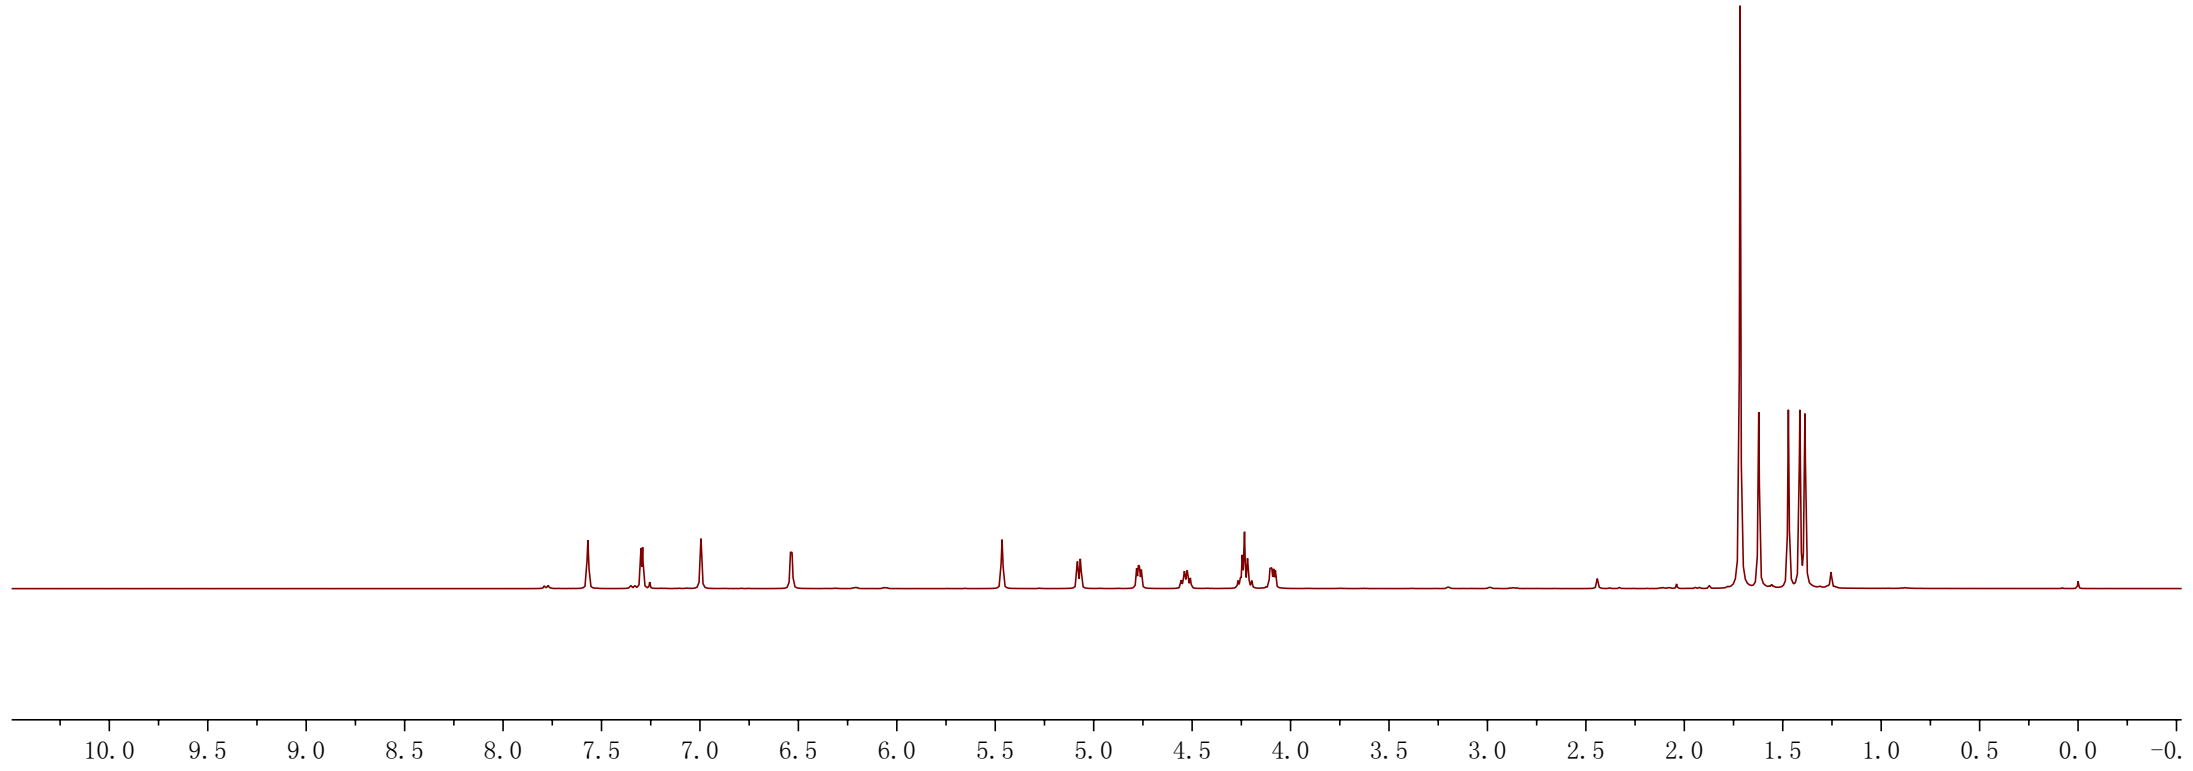

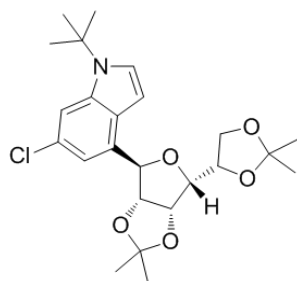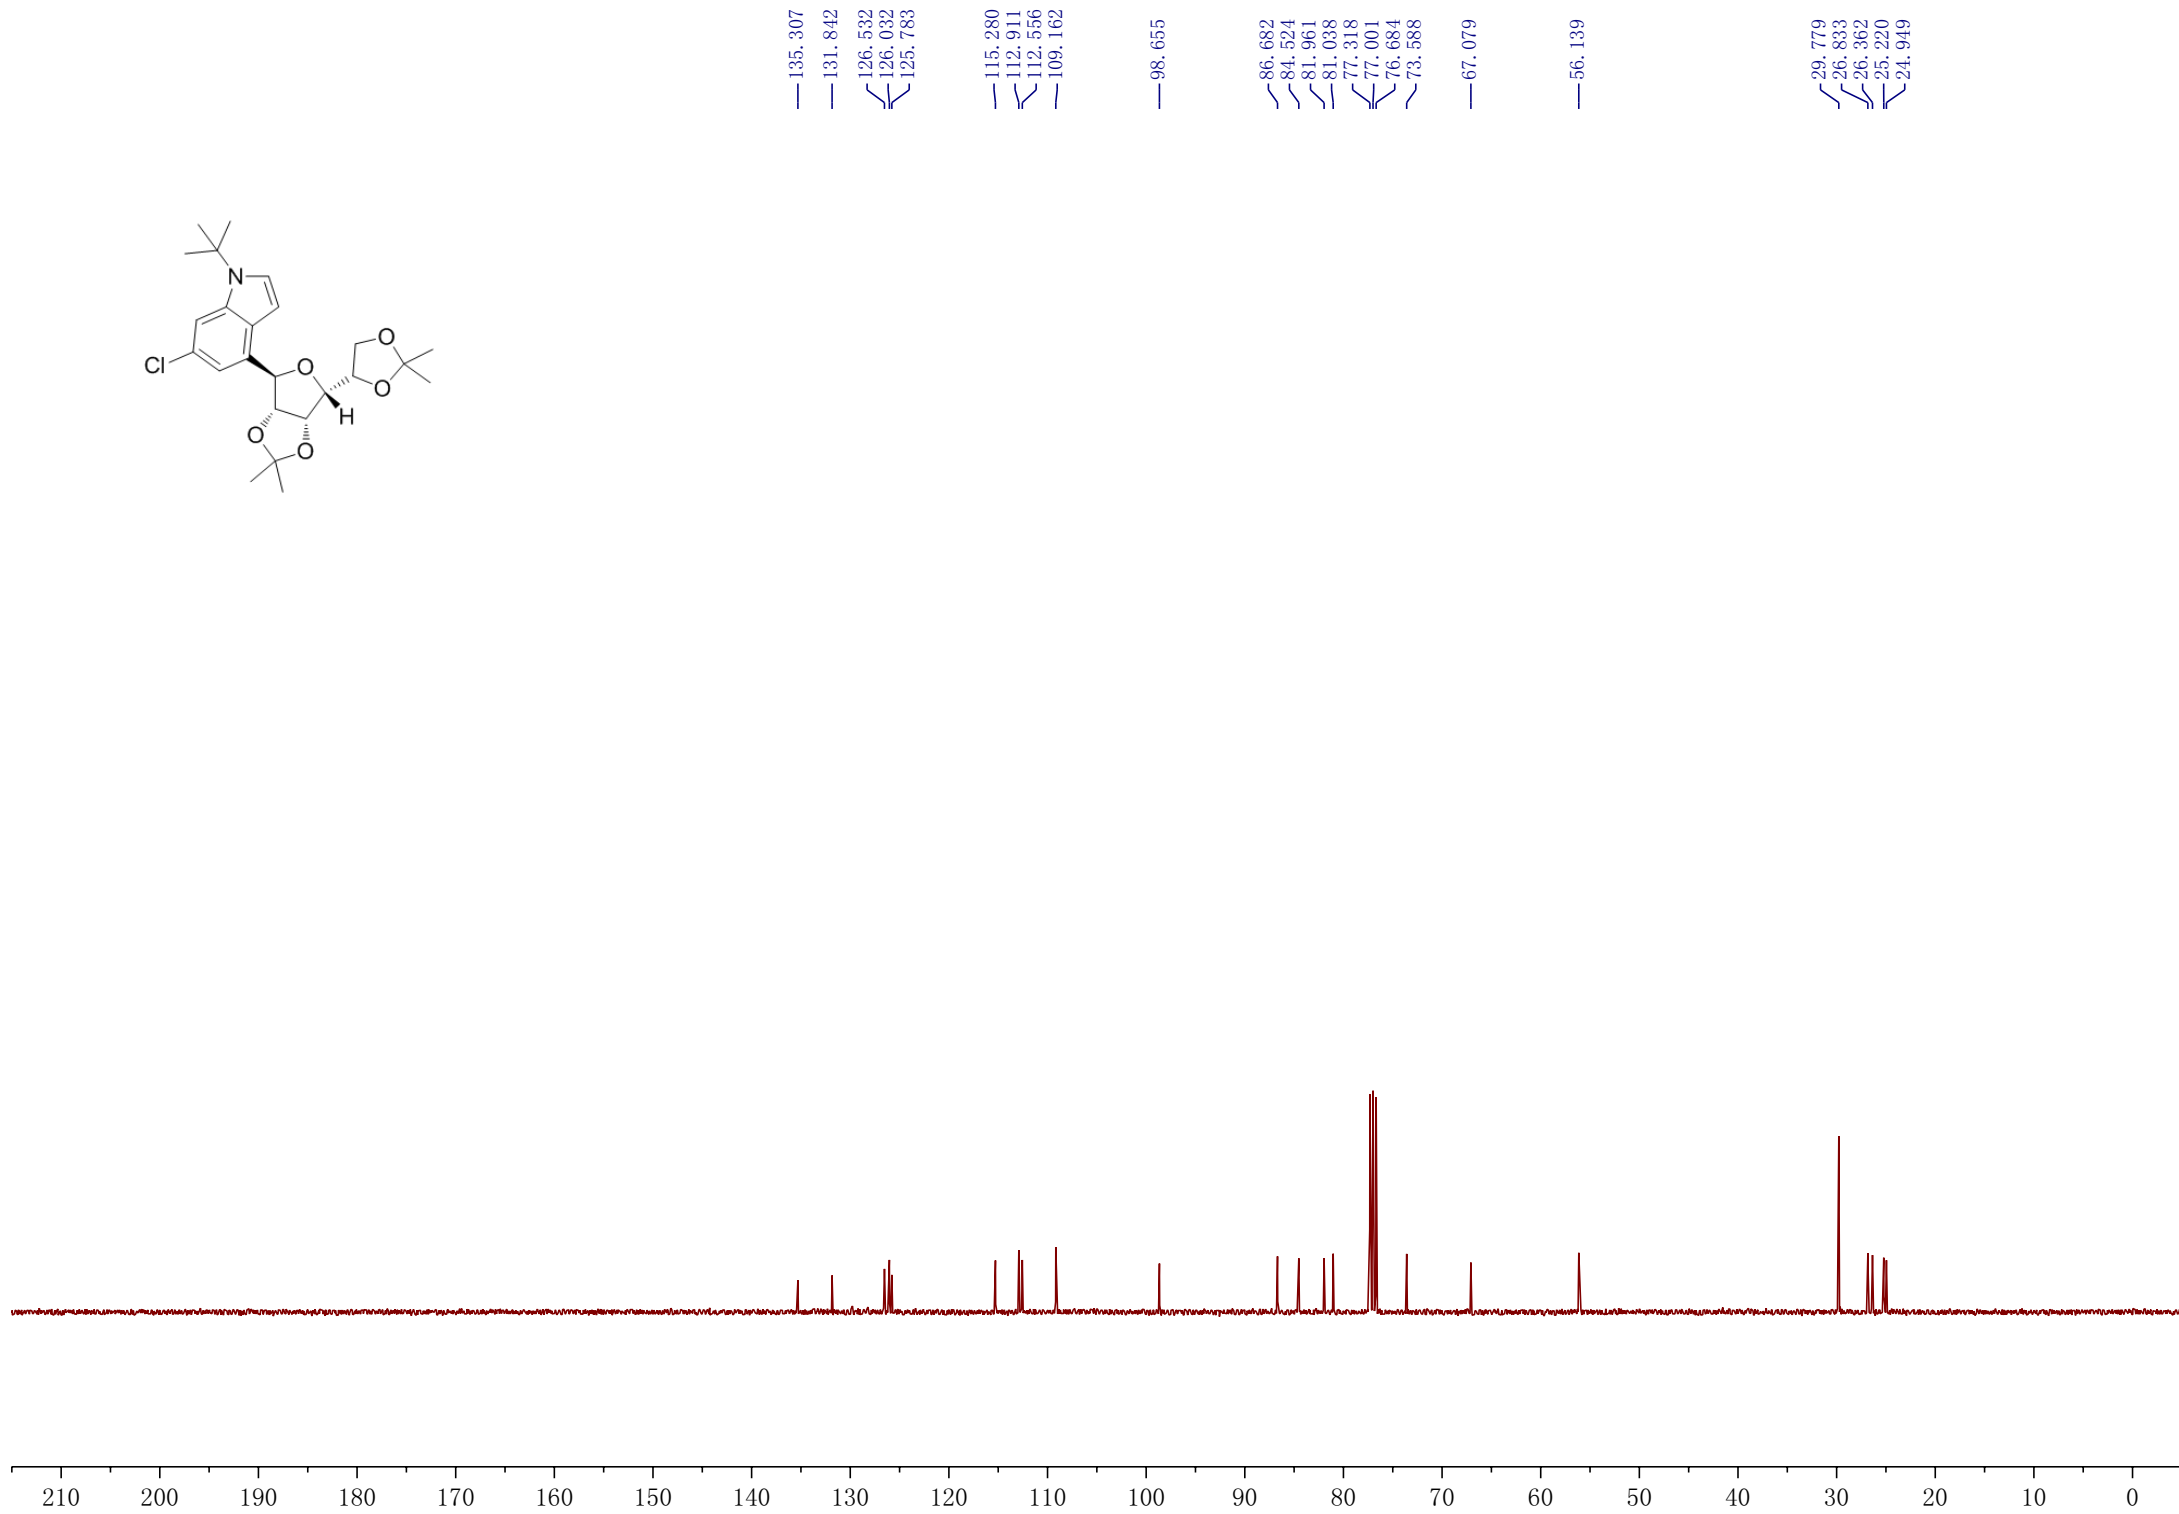

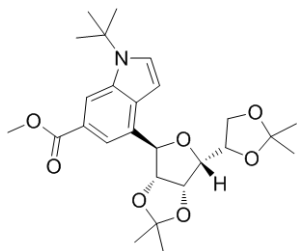

—8.371

—7.697

7.470

7.461

—7.264

6.637

6.628

—5.507

5.162

5.147

4.824

4.815

4.809

4.800

4.560

4.545

4.528

4.513

4.235

4.221

4.068

4.059

4.049

4.039

3.953

—1.775

—1.634

—1.452

—1.409

—0.000

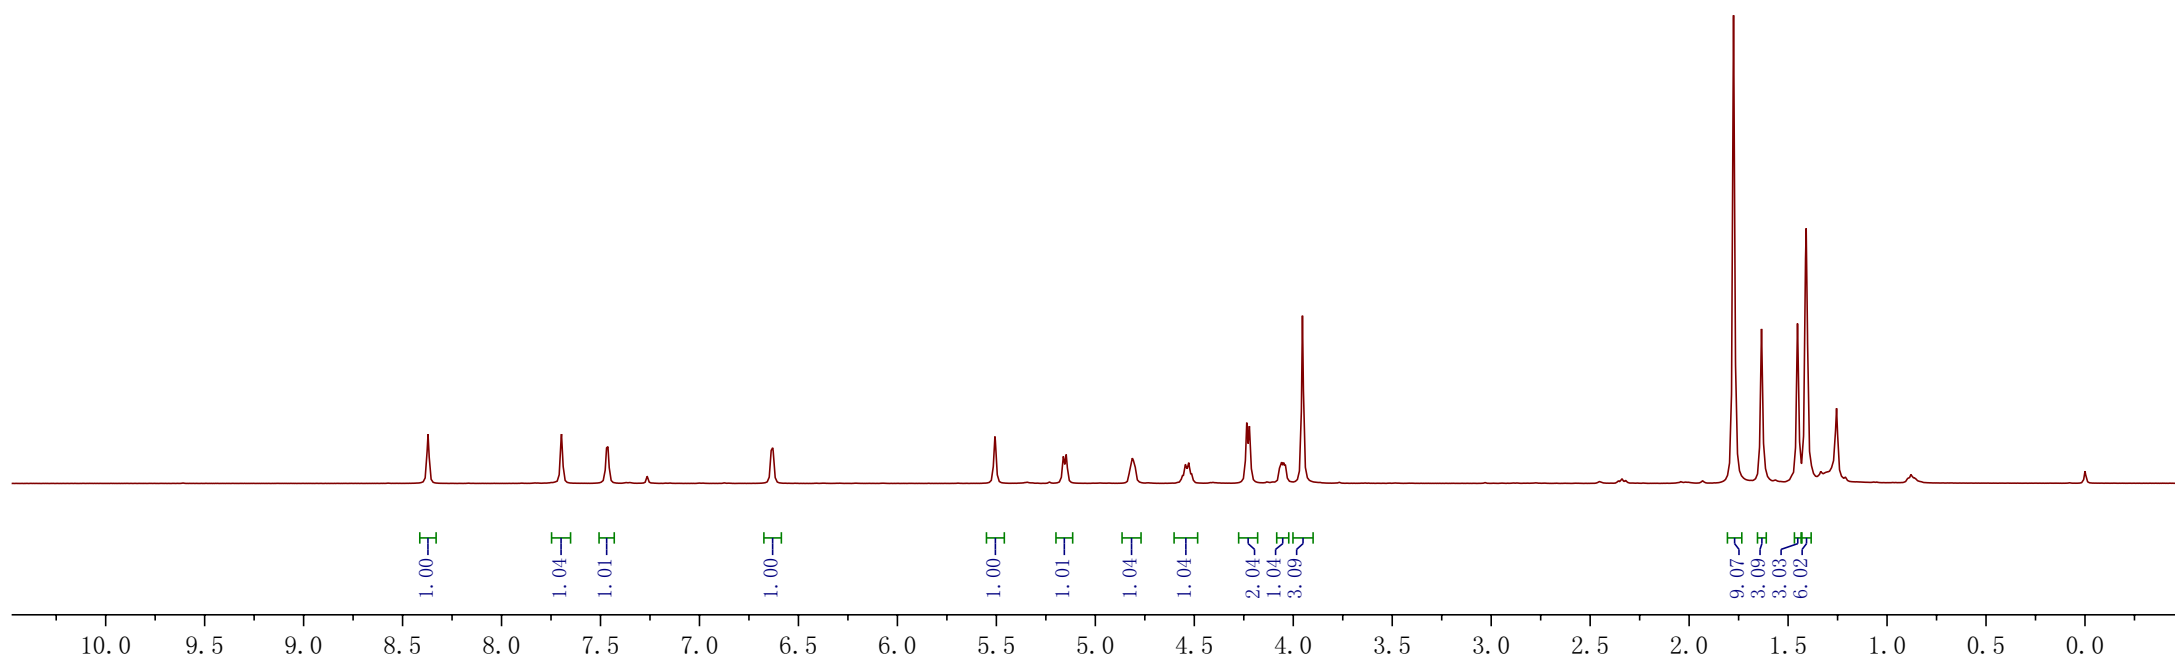



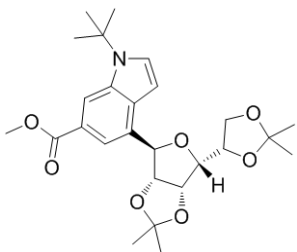

— 168.170

— 134.512  
— 131.303  
— 130.054  
— 128.762

— 122.131

— 115.729  
— 115.370  
— 112.869  
— 109.216

— 99.201

— 86.237  
— 84.432  
— 81.873  
— 81.132  
— 77.354  
— 77.036  
— 76.718  
— 73.569

— 67.291

— 56.526

— 52.064

— 30.087  
— 26.796  
— 26.395  
— 25.335  
— 24.982

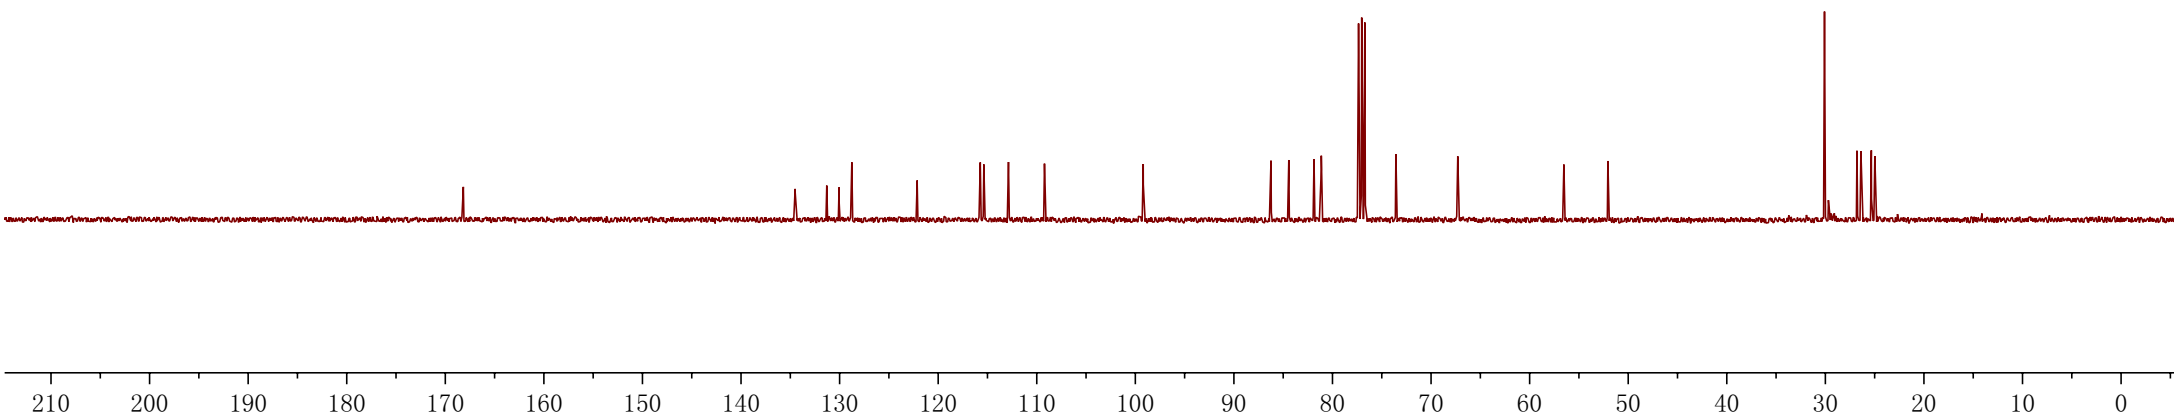

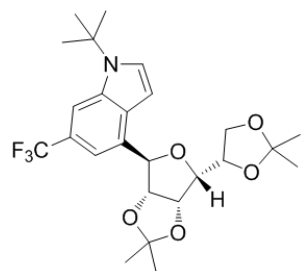

7.852

7.459

7.450

7.257

7.249

6.638

6.636

6.629

6.627

5.515

5.110

5.106

5.095

5.091

4.797

4.788

4.782

4.773

4.570

4.556

4.552

4.542

4.538

4.524

4.258

4.248

4.236

4.232

4.225

4.210

4.099

4.089

4.080

4.071

1.760

1.636

1.458

1.416

1.400

0.000

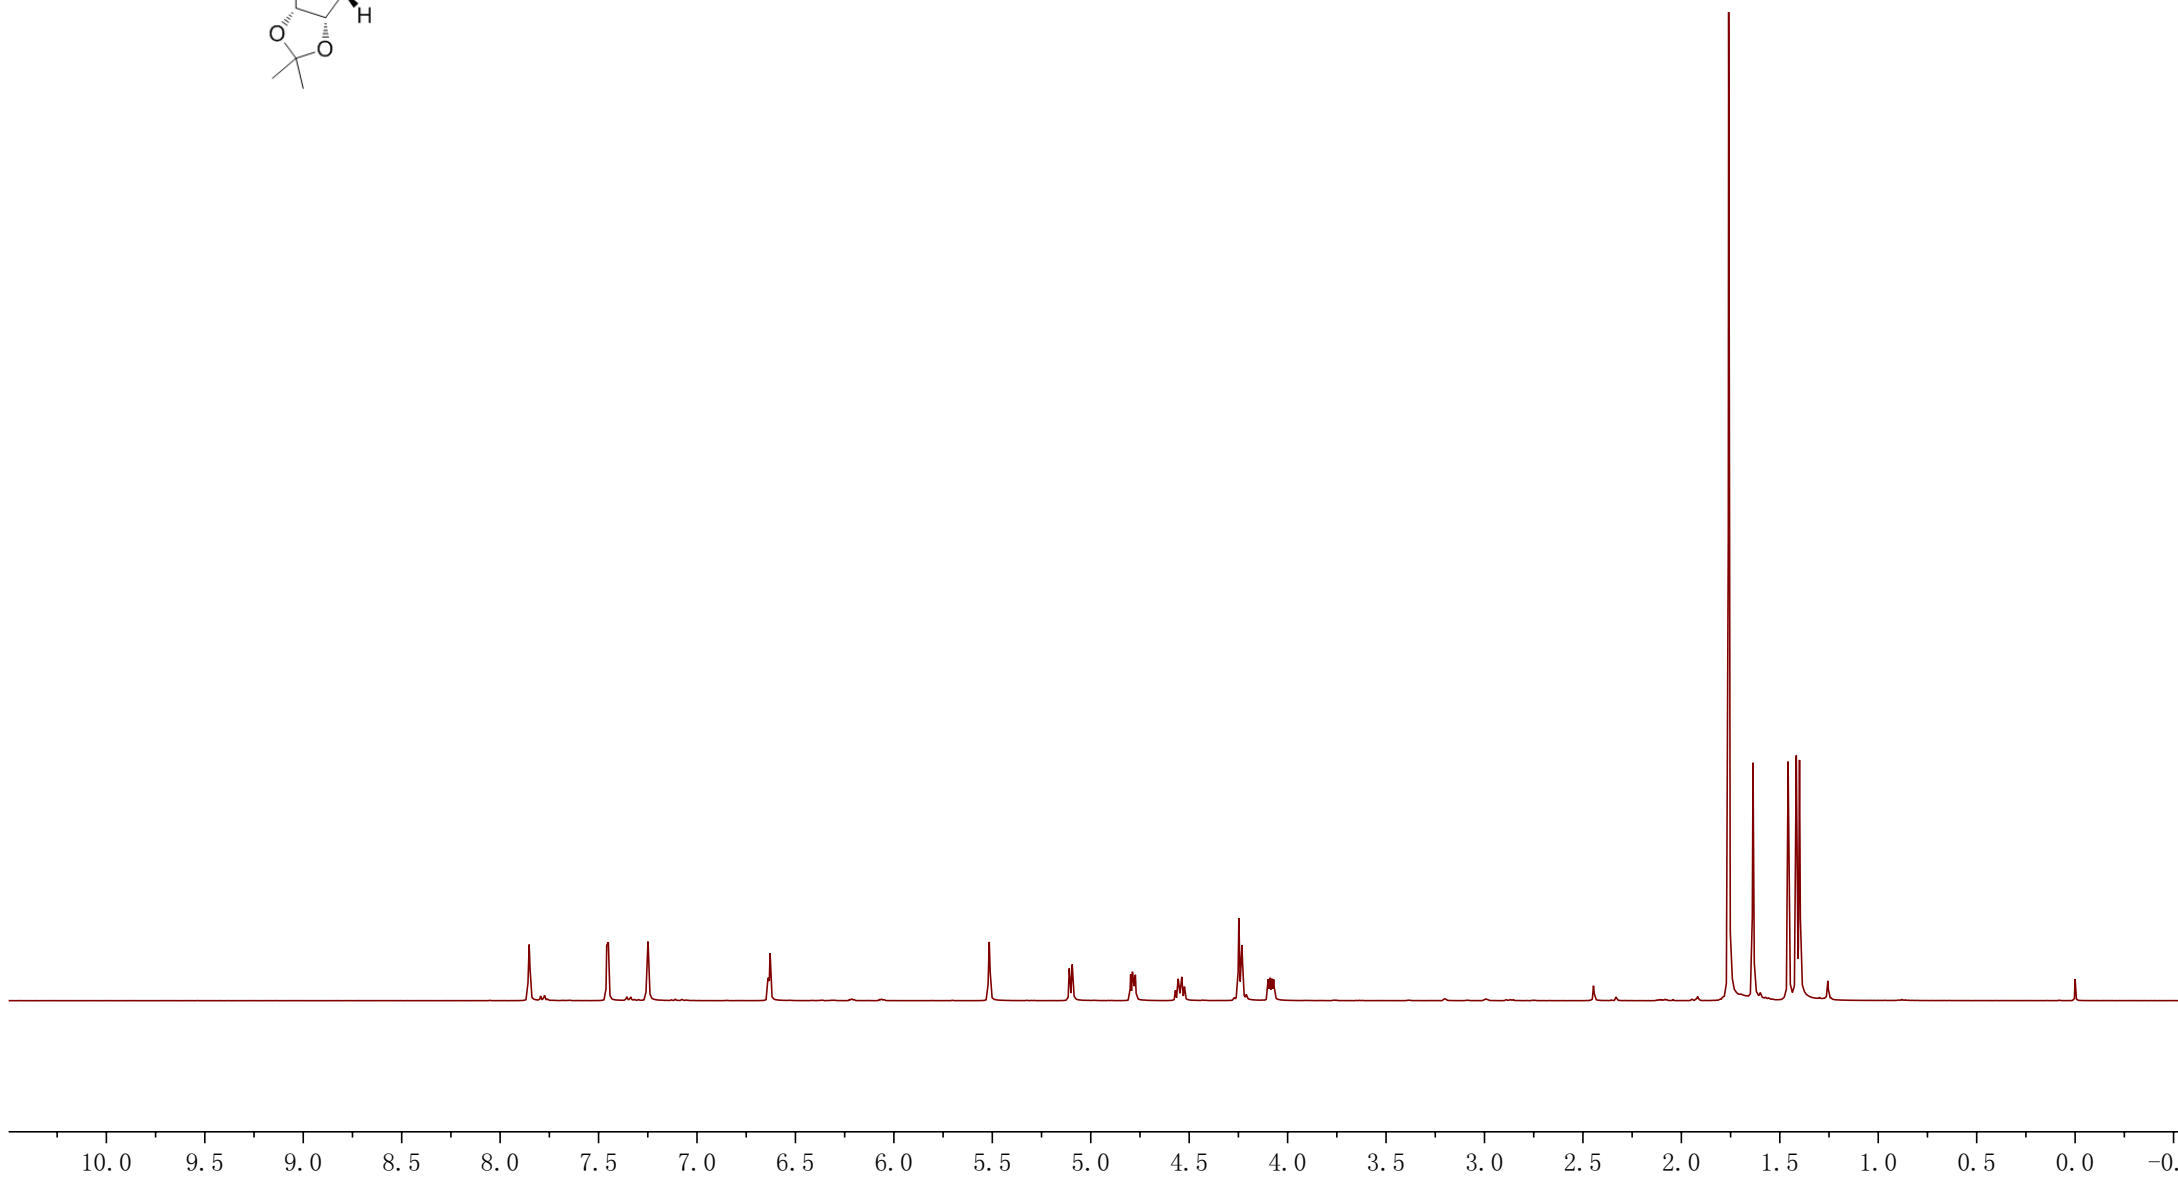

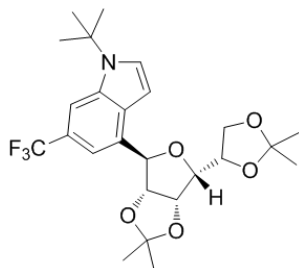

133.989  
131.352  
129.642  
129.264  
128.099  
126.564  
123.865  
123.018  
122.706  
122.392  
122.077  
121.168  
113.009  
111.256  
111.222  
111.187  
111.153  
110.222  
110.179  
110.134  
110.089  
109.219  
98.956

86.553  
84.564  
82.009  
81.075

73.548

67.129

56.476

29.945  
26.761  
26.396  
25.299  
24.988

210 200 190 180 170 160 150 140 130 120 110 100 90 80 70 60 50 40 30 20 10 0

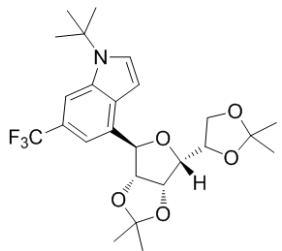

—60.342

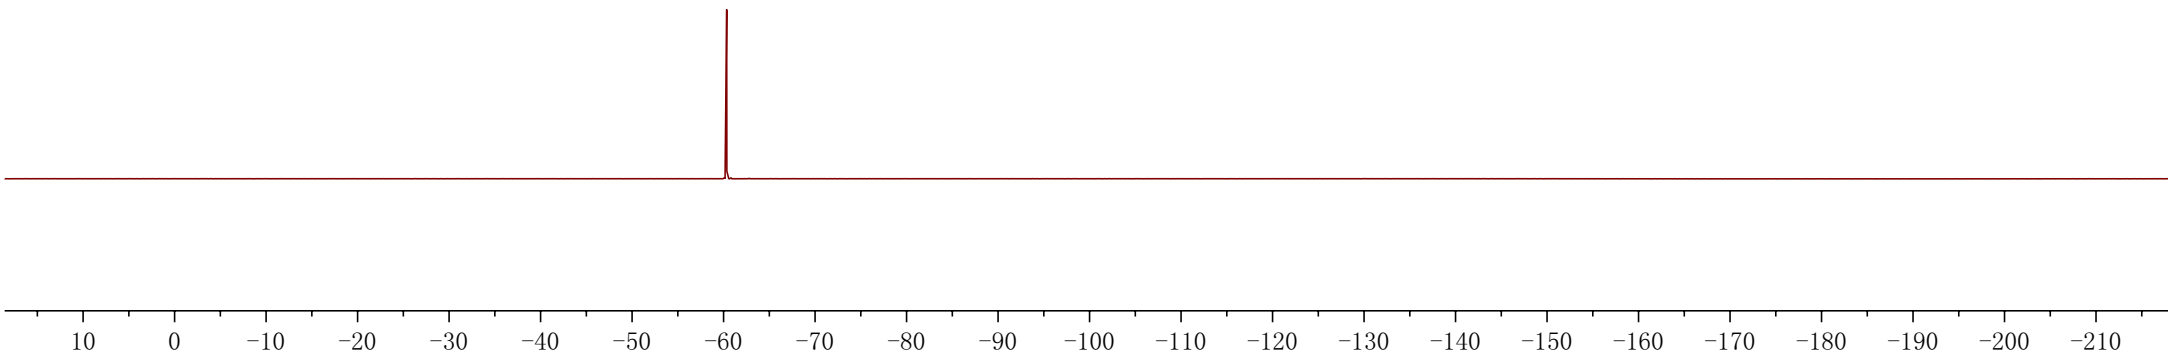

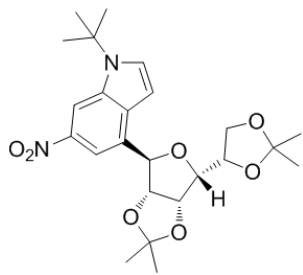

8.589  
8.585

7.938  
7.934  
7.931

7.589  
7.581

7.264

6.696  
6.687

5.490

5.097  
5.093  
5.082  
5.078

4.829  
4.819  
4.814

4.805  
4.563  
4.548  
4.544

4.534  
4.530  
4.516  
4.244  
4.230

4.087  
4.077  
4.068  
4.059

1.796  
1.639  
1.619  
1.463  
1.415  
1.408

0.073  
0.000

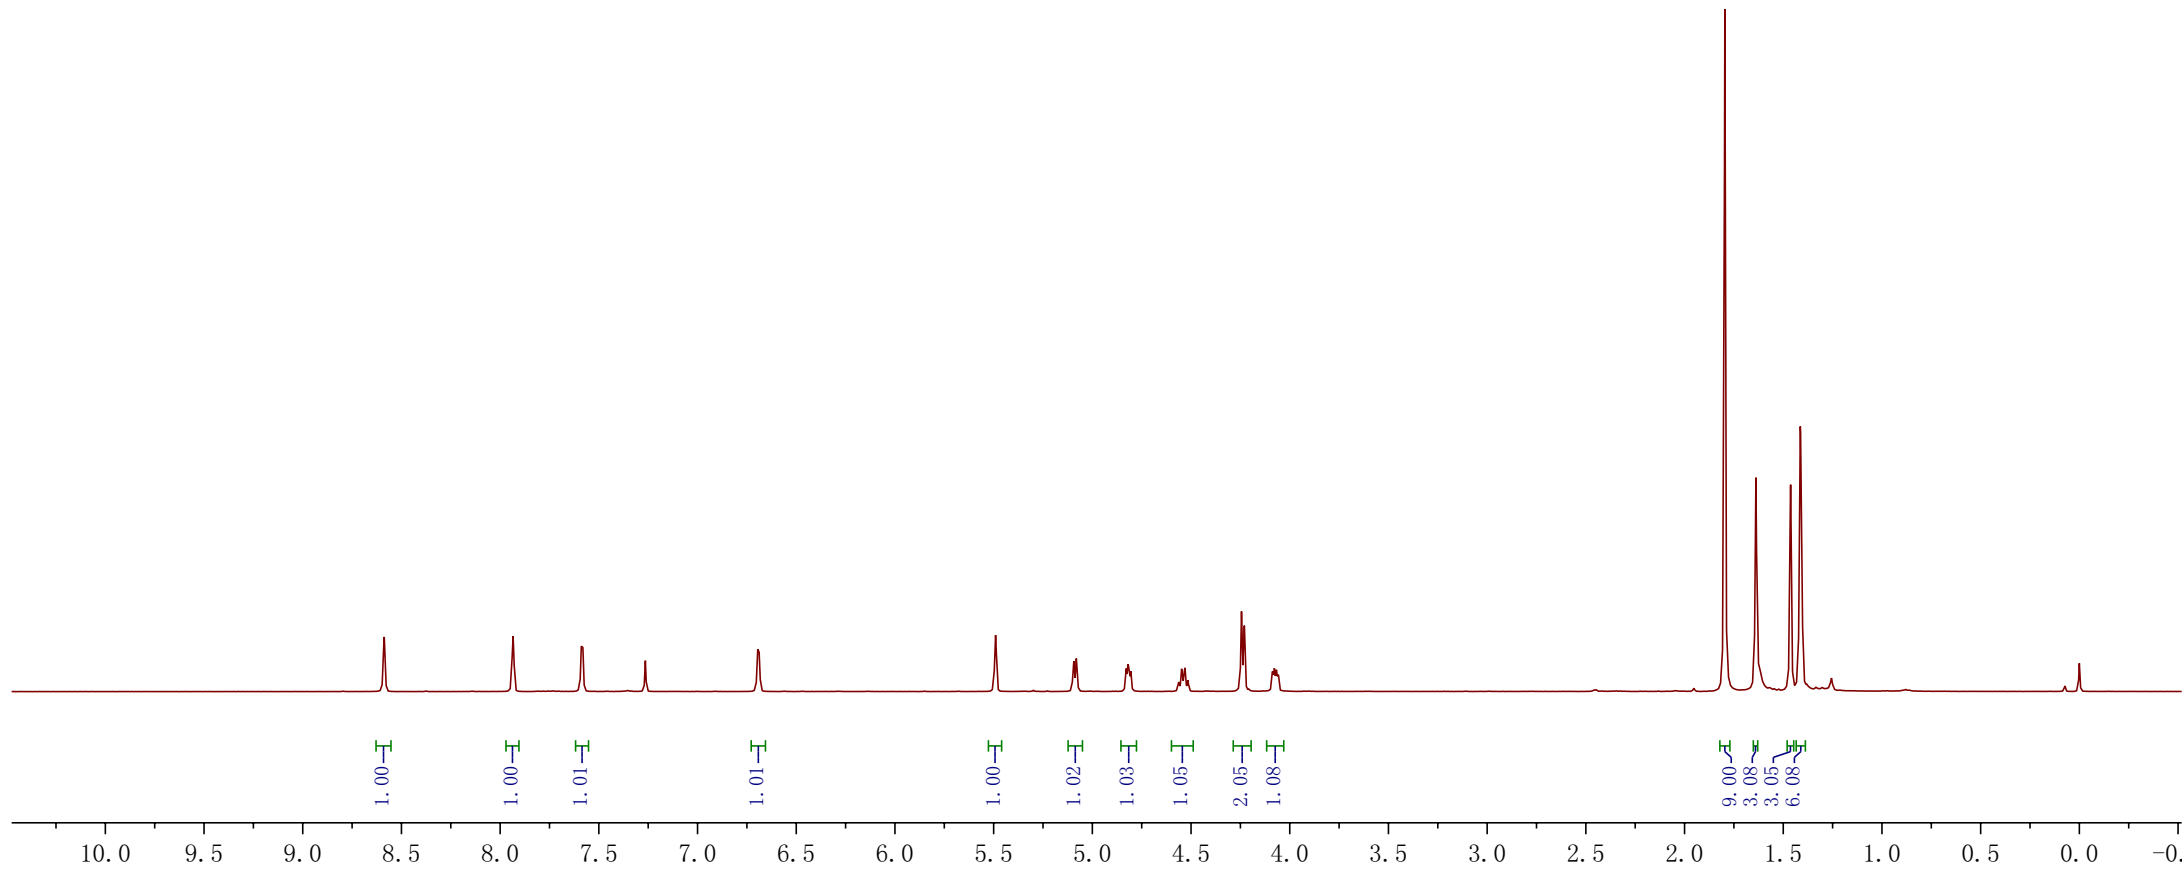

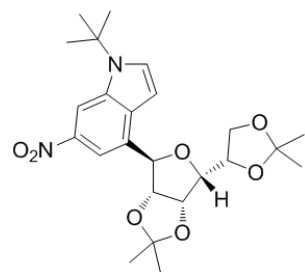

— 142.127

— 133.490  
— 132.243  
— 131.183

— 113.202  
— 110.298  
— 109.719  
— 109.284

— 99.970

— 86.284  
— 84.295  
— 82.136  
— 81.122  
— 77.319  
— 77.000  
— 76.682  
— 73.505

— 67.158

— 57.102

— 30.126  
— 26.799  
— 26.455  
— 25.300  
— 25.033

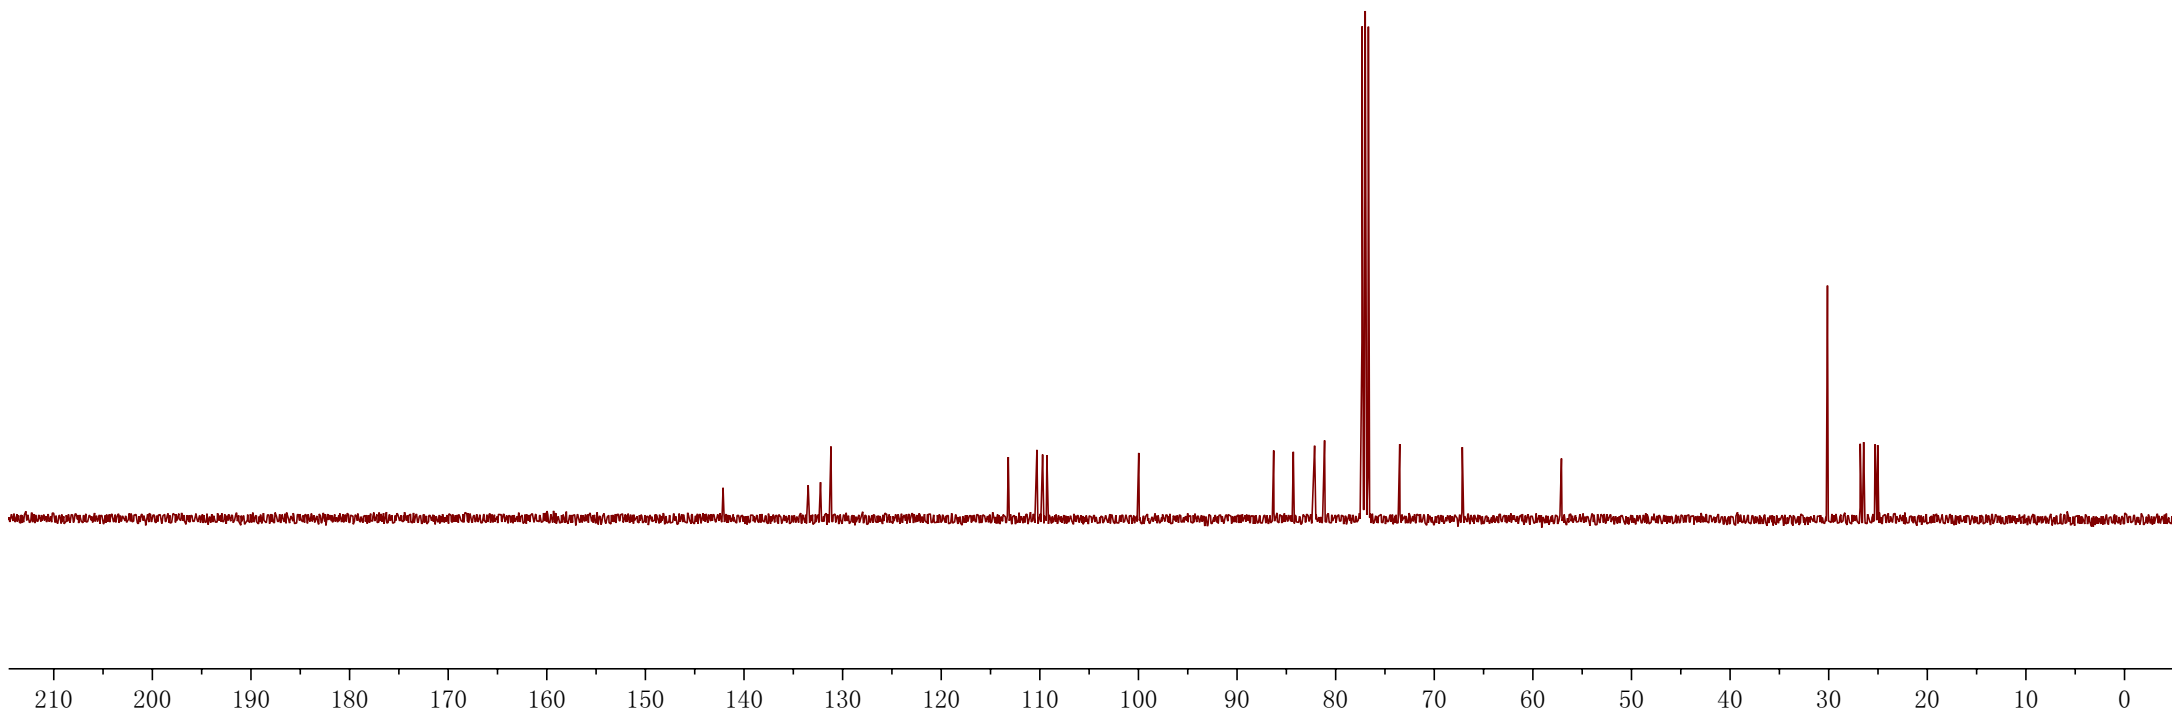

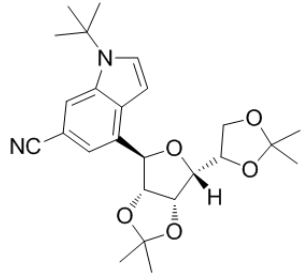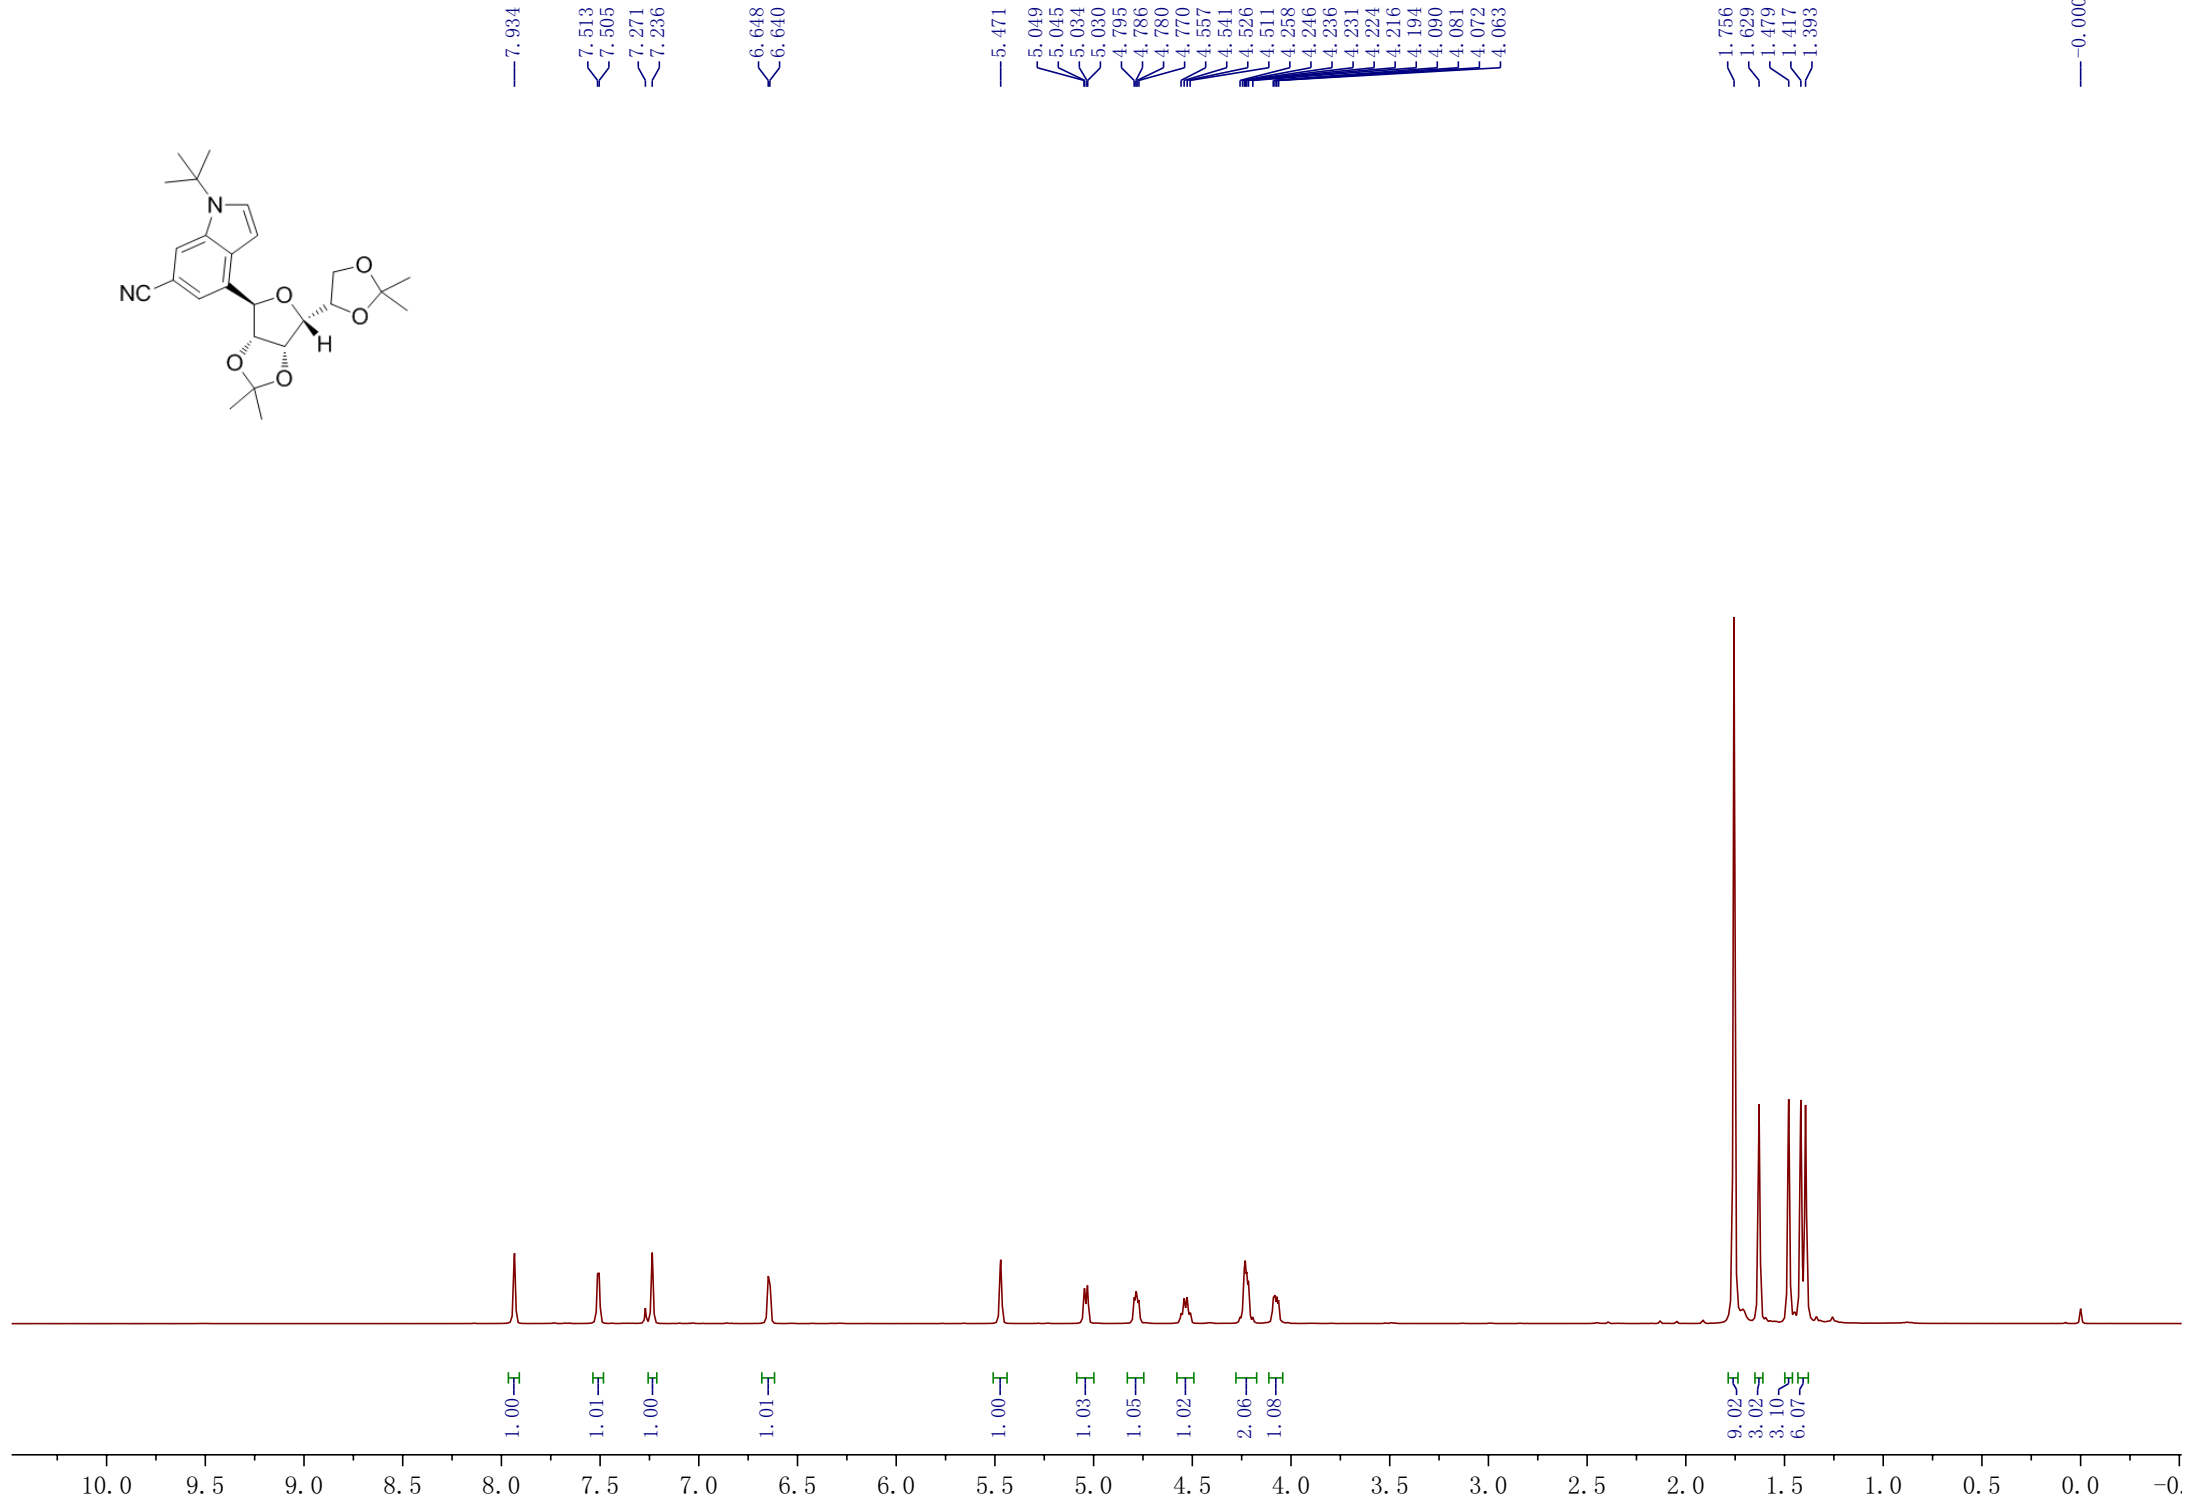

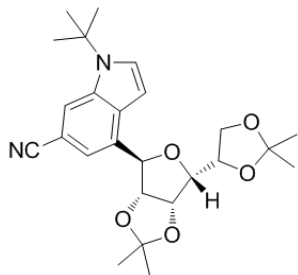

133.806  
132.089  
130.502  
129.290

120.938  
117.801  
116.995  
113.114  
109.202

103.046  
99.559

86.468  
84.389  
82.062  
81.054  
77.319  
77.000  
76.683  
73.556

66.928

56.770

29.953  
26.826  
26.391  
25.214  
24.960

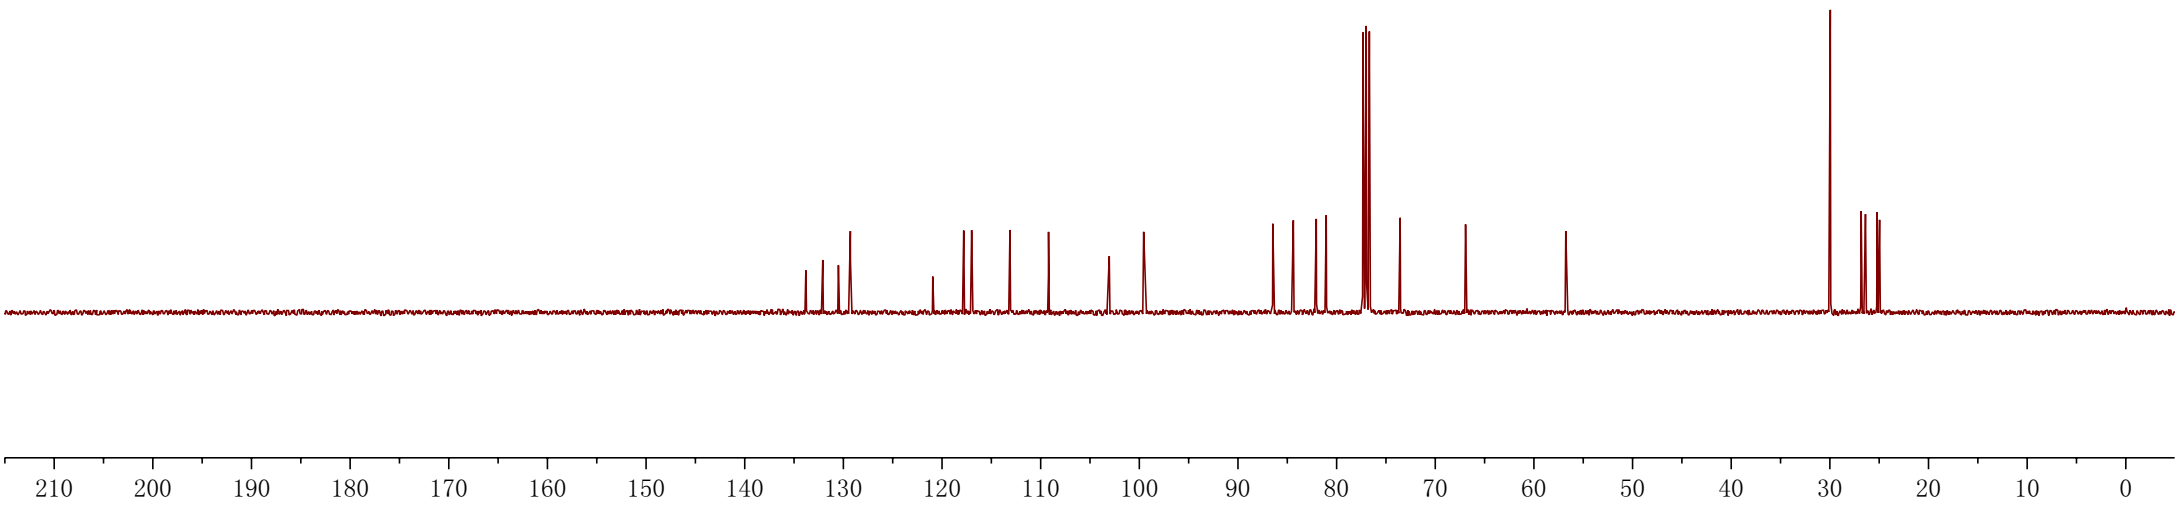



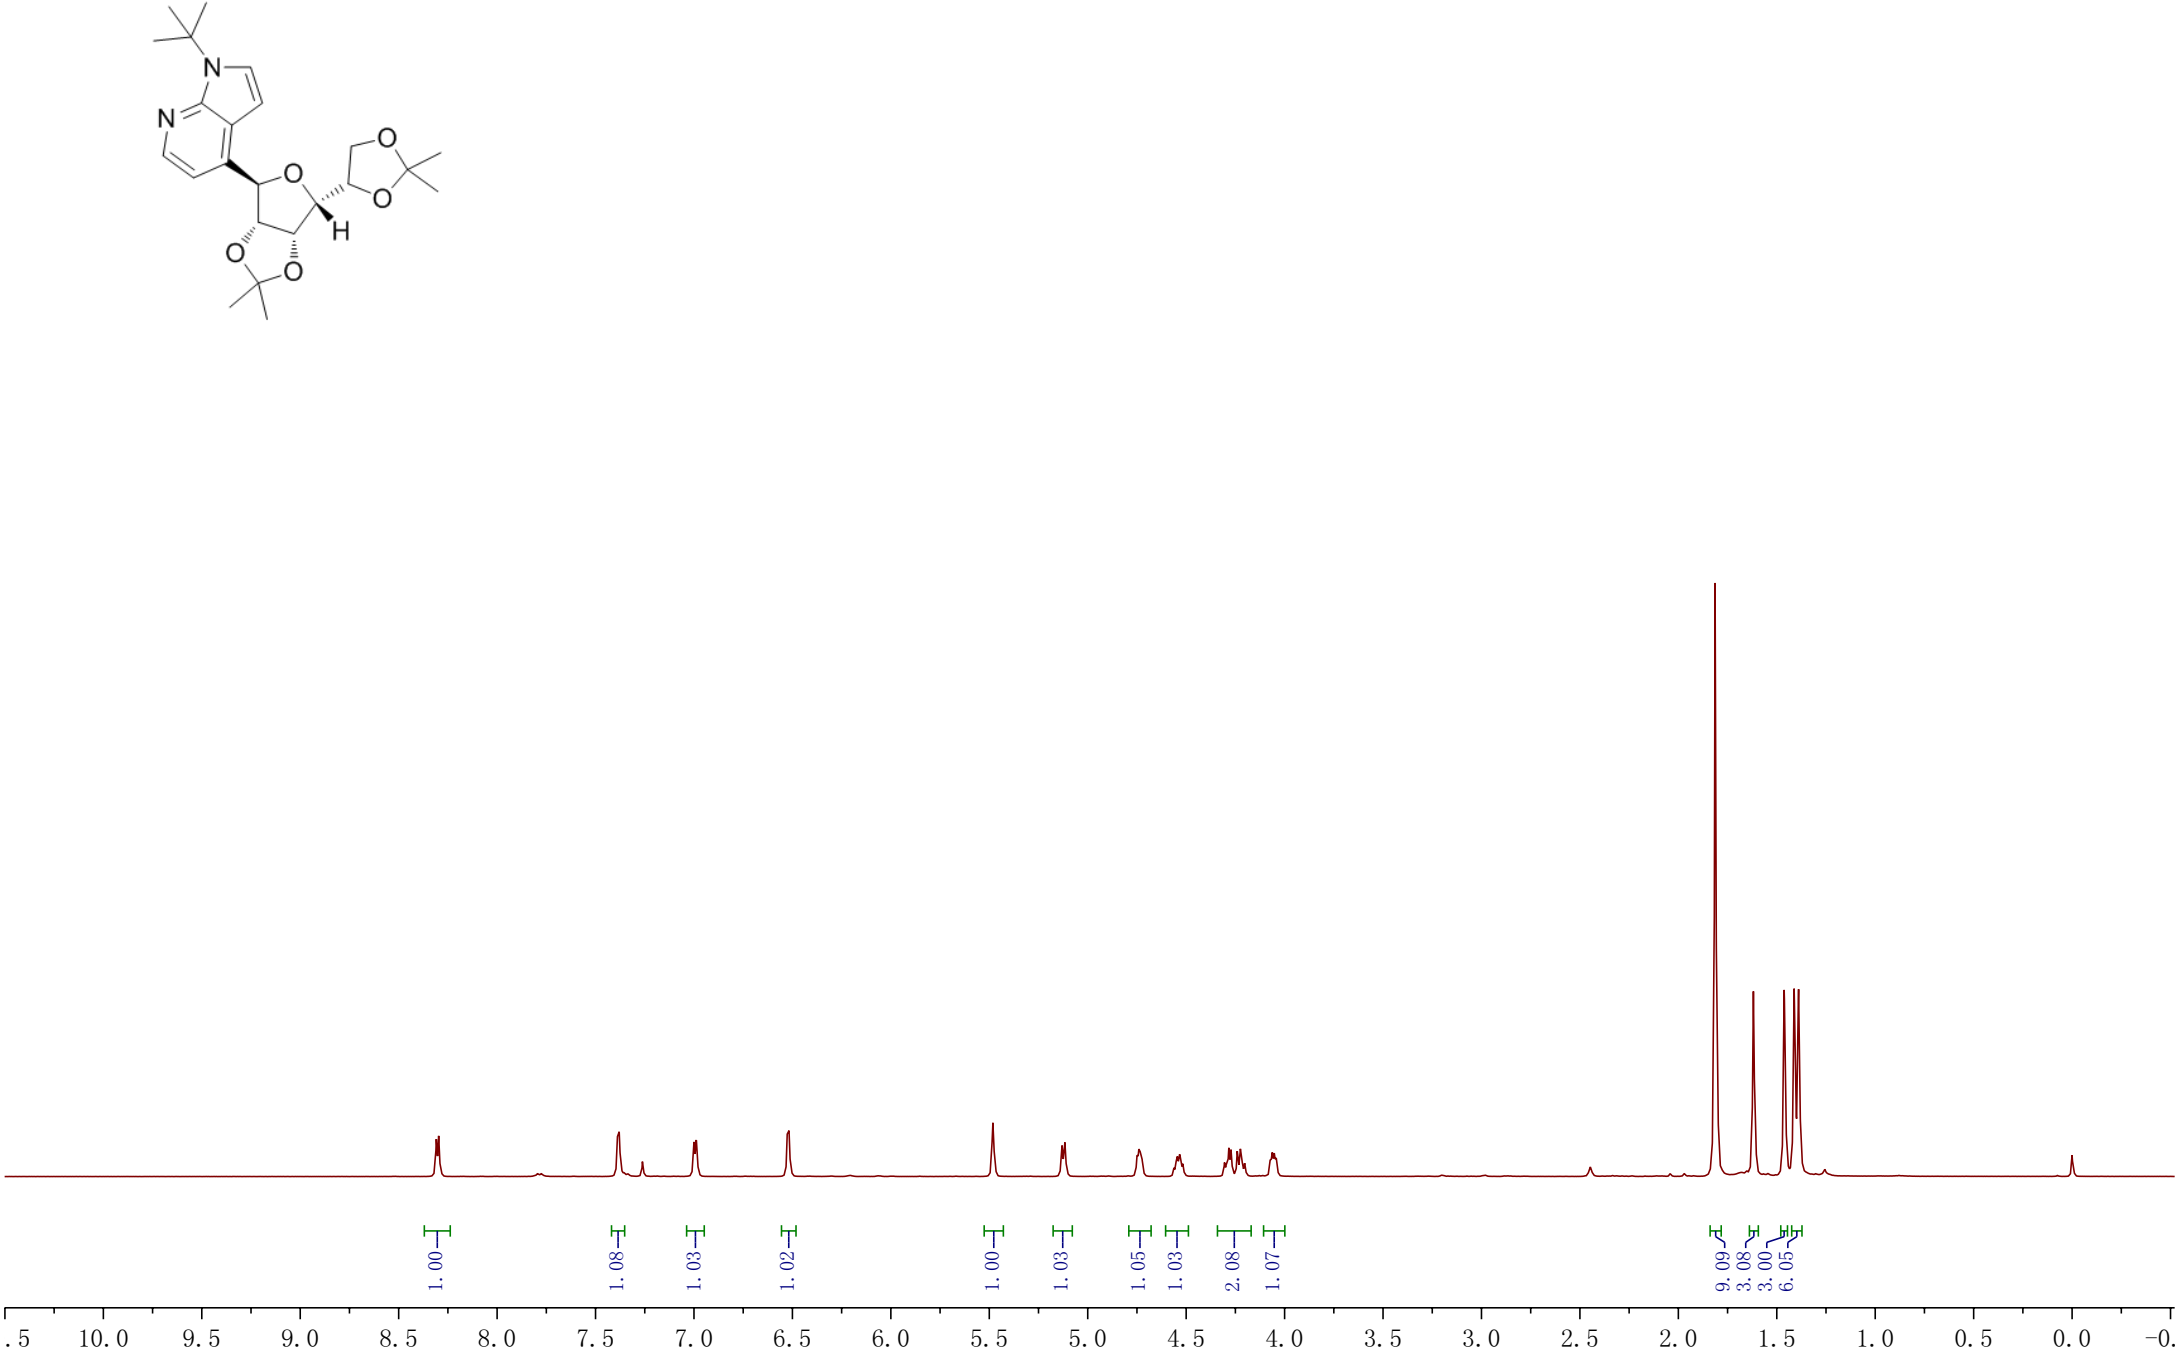

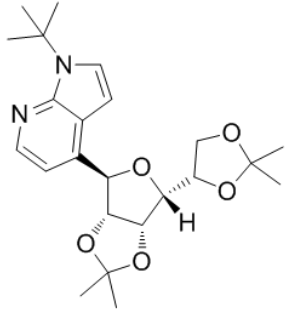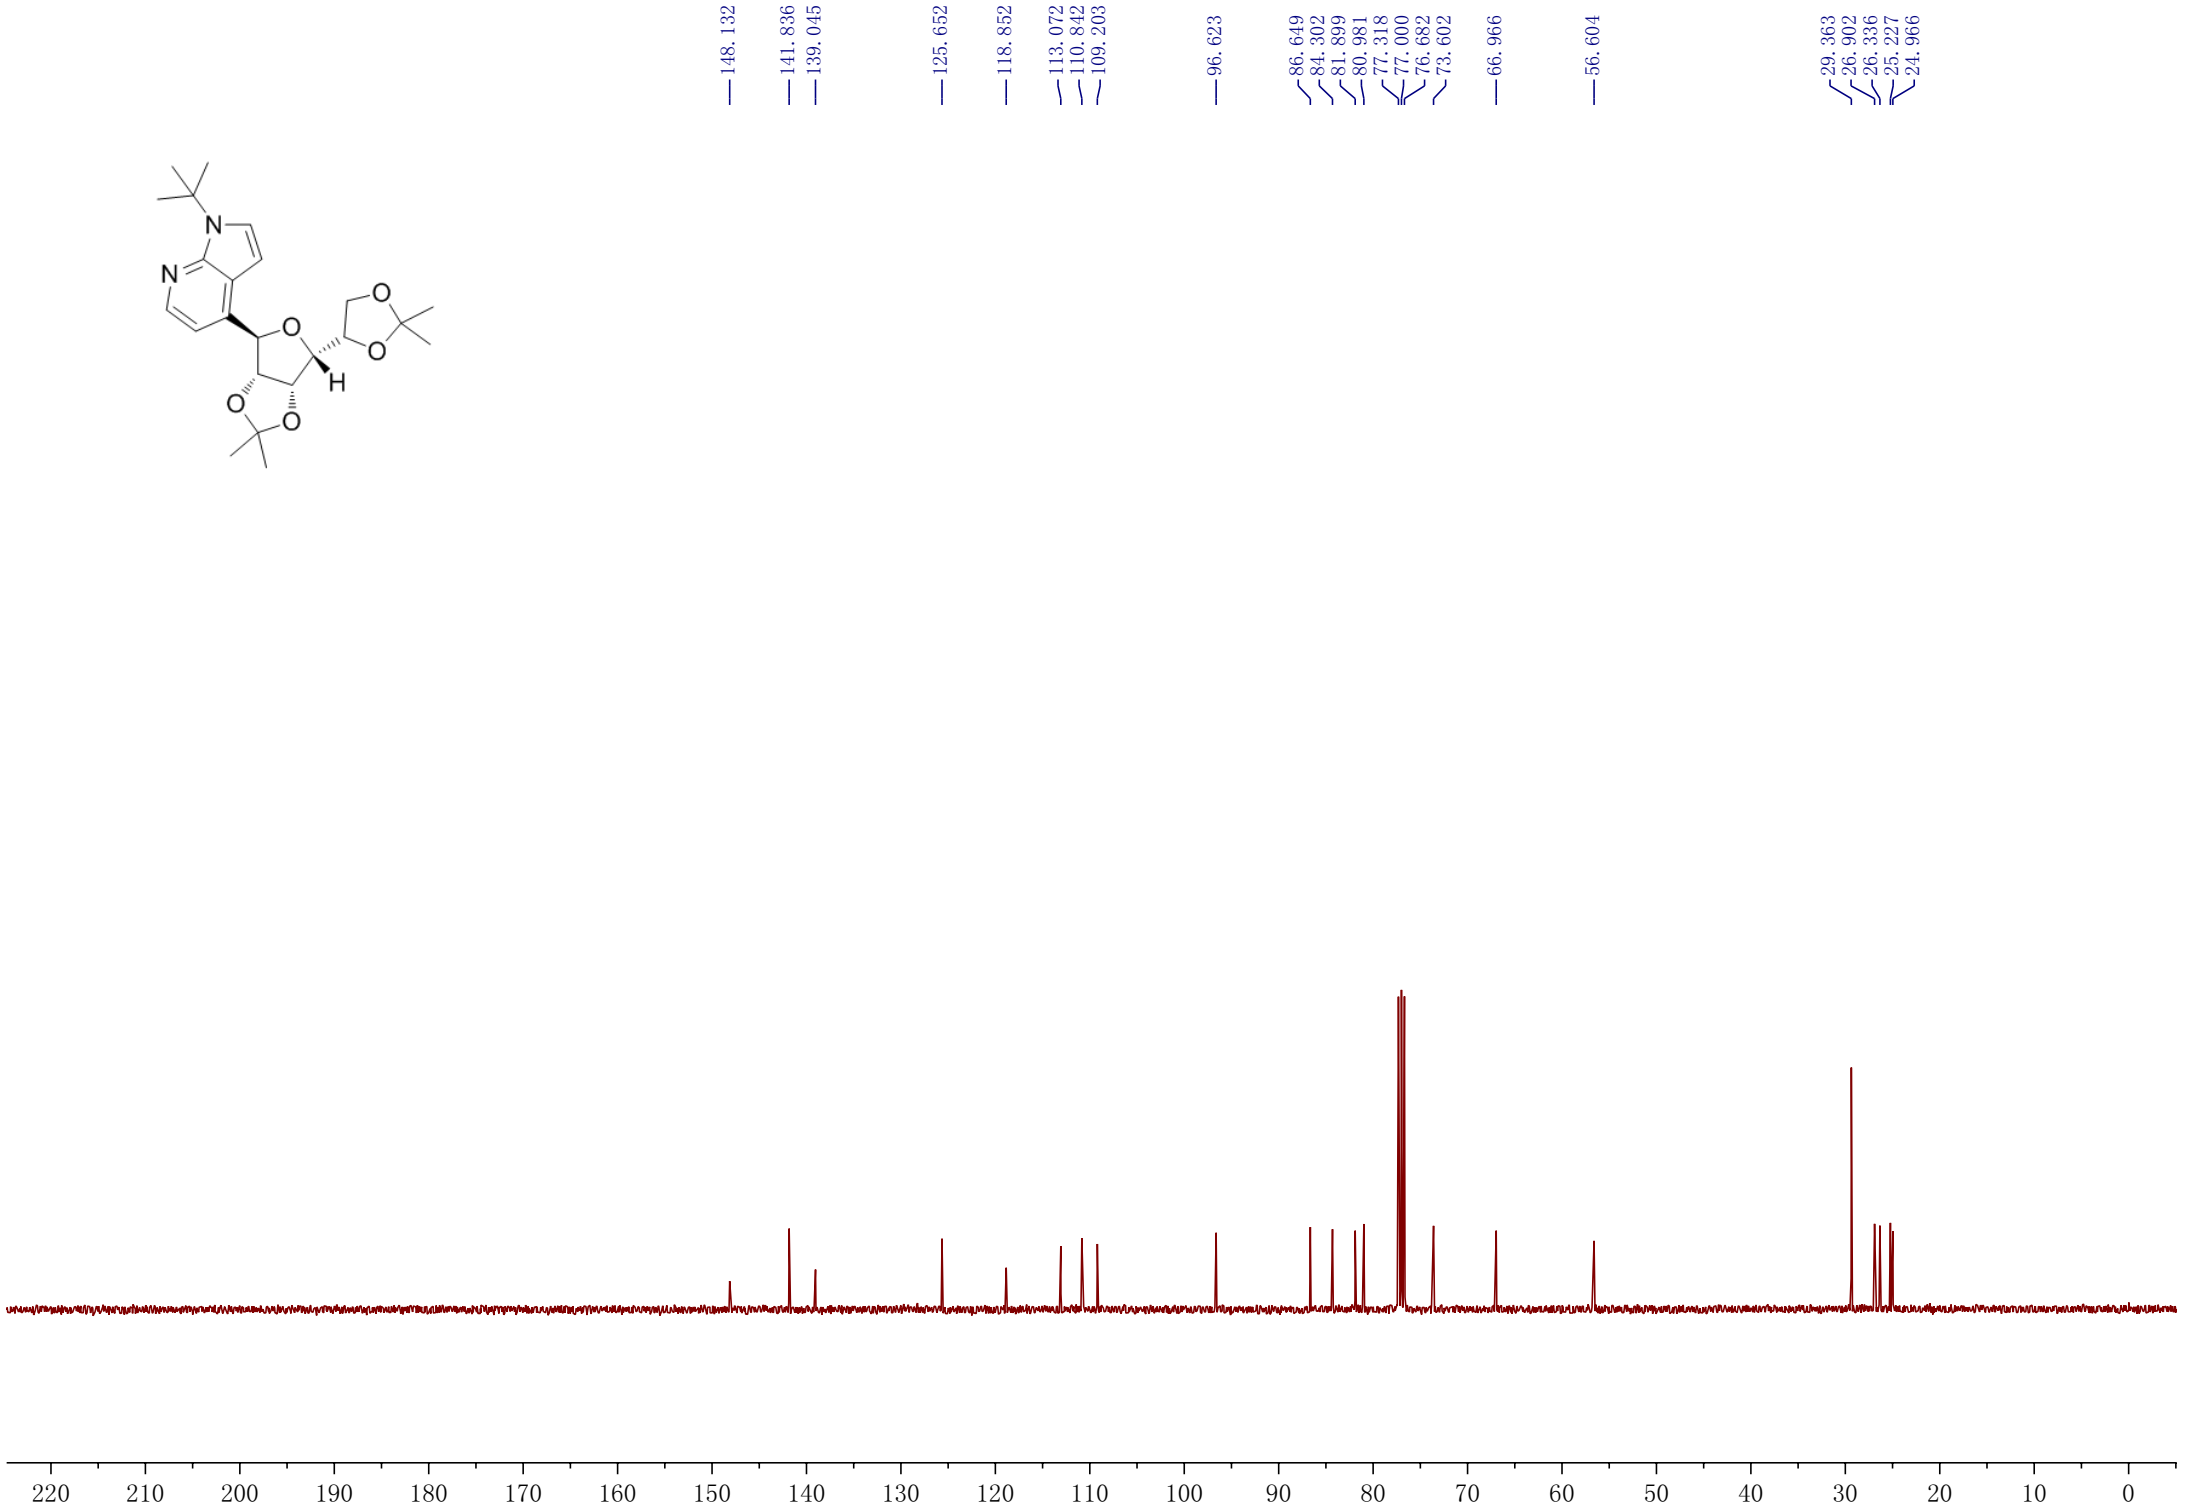

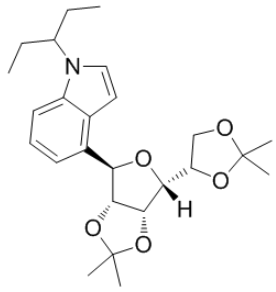

7.32  
7.30  
7.25  
7.18  
7.17  
7.16  
7.14  
7.04  
6.65  
6.65

5.54  
5.17  
5.15  
4.78  
4.77  
4.77  
4.76  
4.58  
4.57  
4.56  
4.56  
4.55  
4.55  
4.54  
4.53  
4.31  
4.30  
4.29  
4.28  
4.24  
4.23  
4.22  
4.21  
4.15  
4.15  
4.14  
4.13  
4.12  
1.93  
1.92  
1.91  
1.90  
1.90  
1.88  
1.88  
1.86  
1.84  
1.83  
1.63  
1.45  
1.41  
1.40  
0.79  
0.79  
0.77  
0.77  
0.76  
0.75  
-0.00

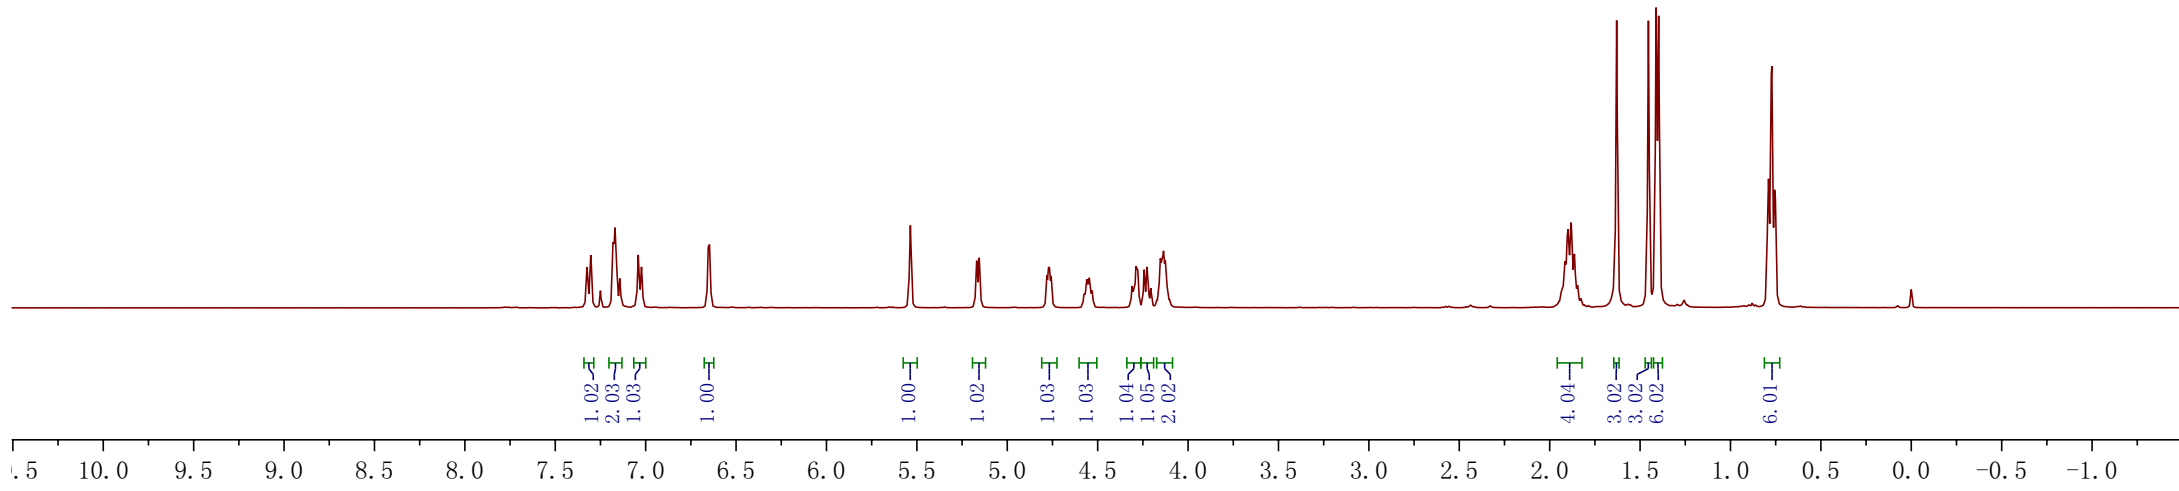

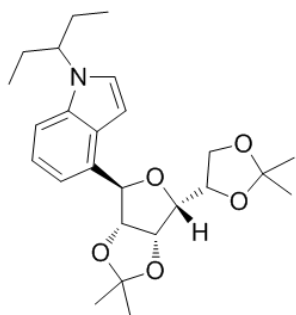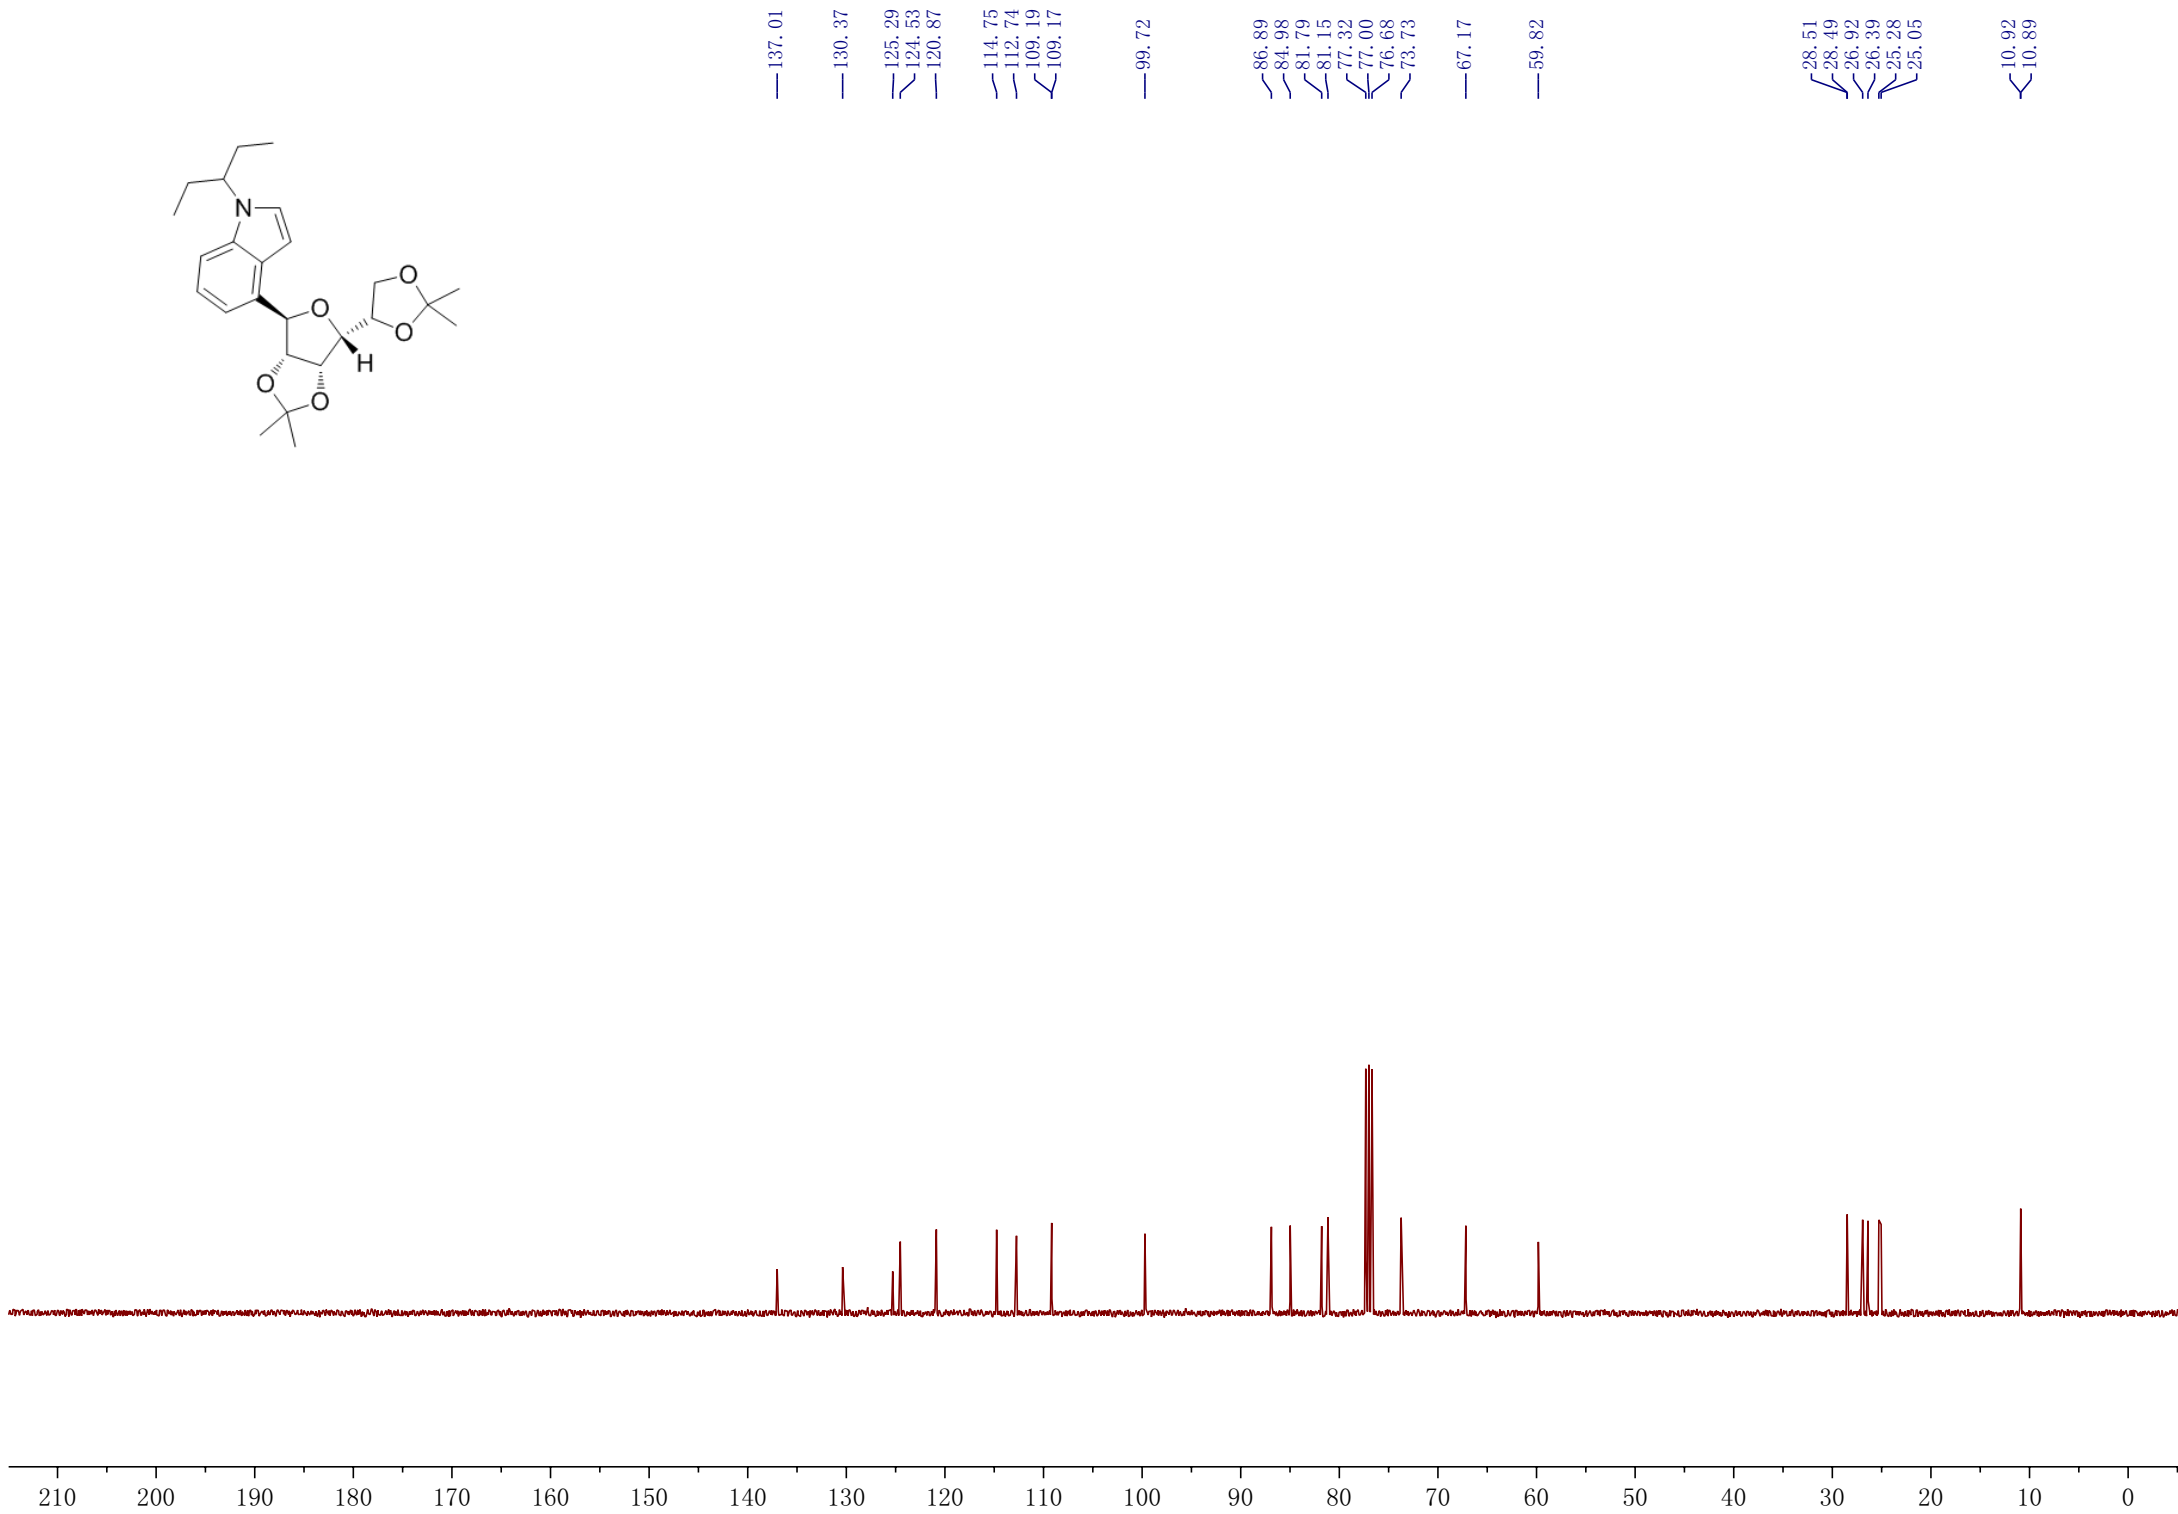

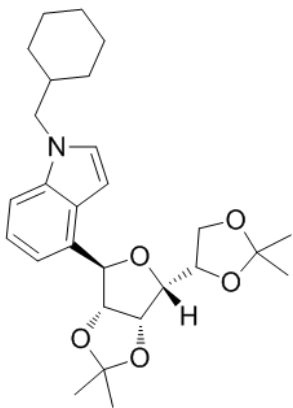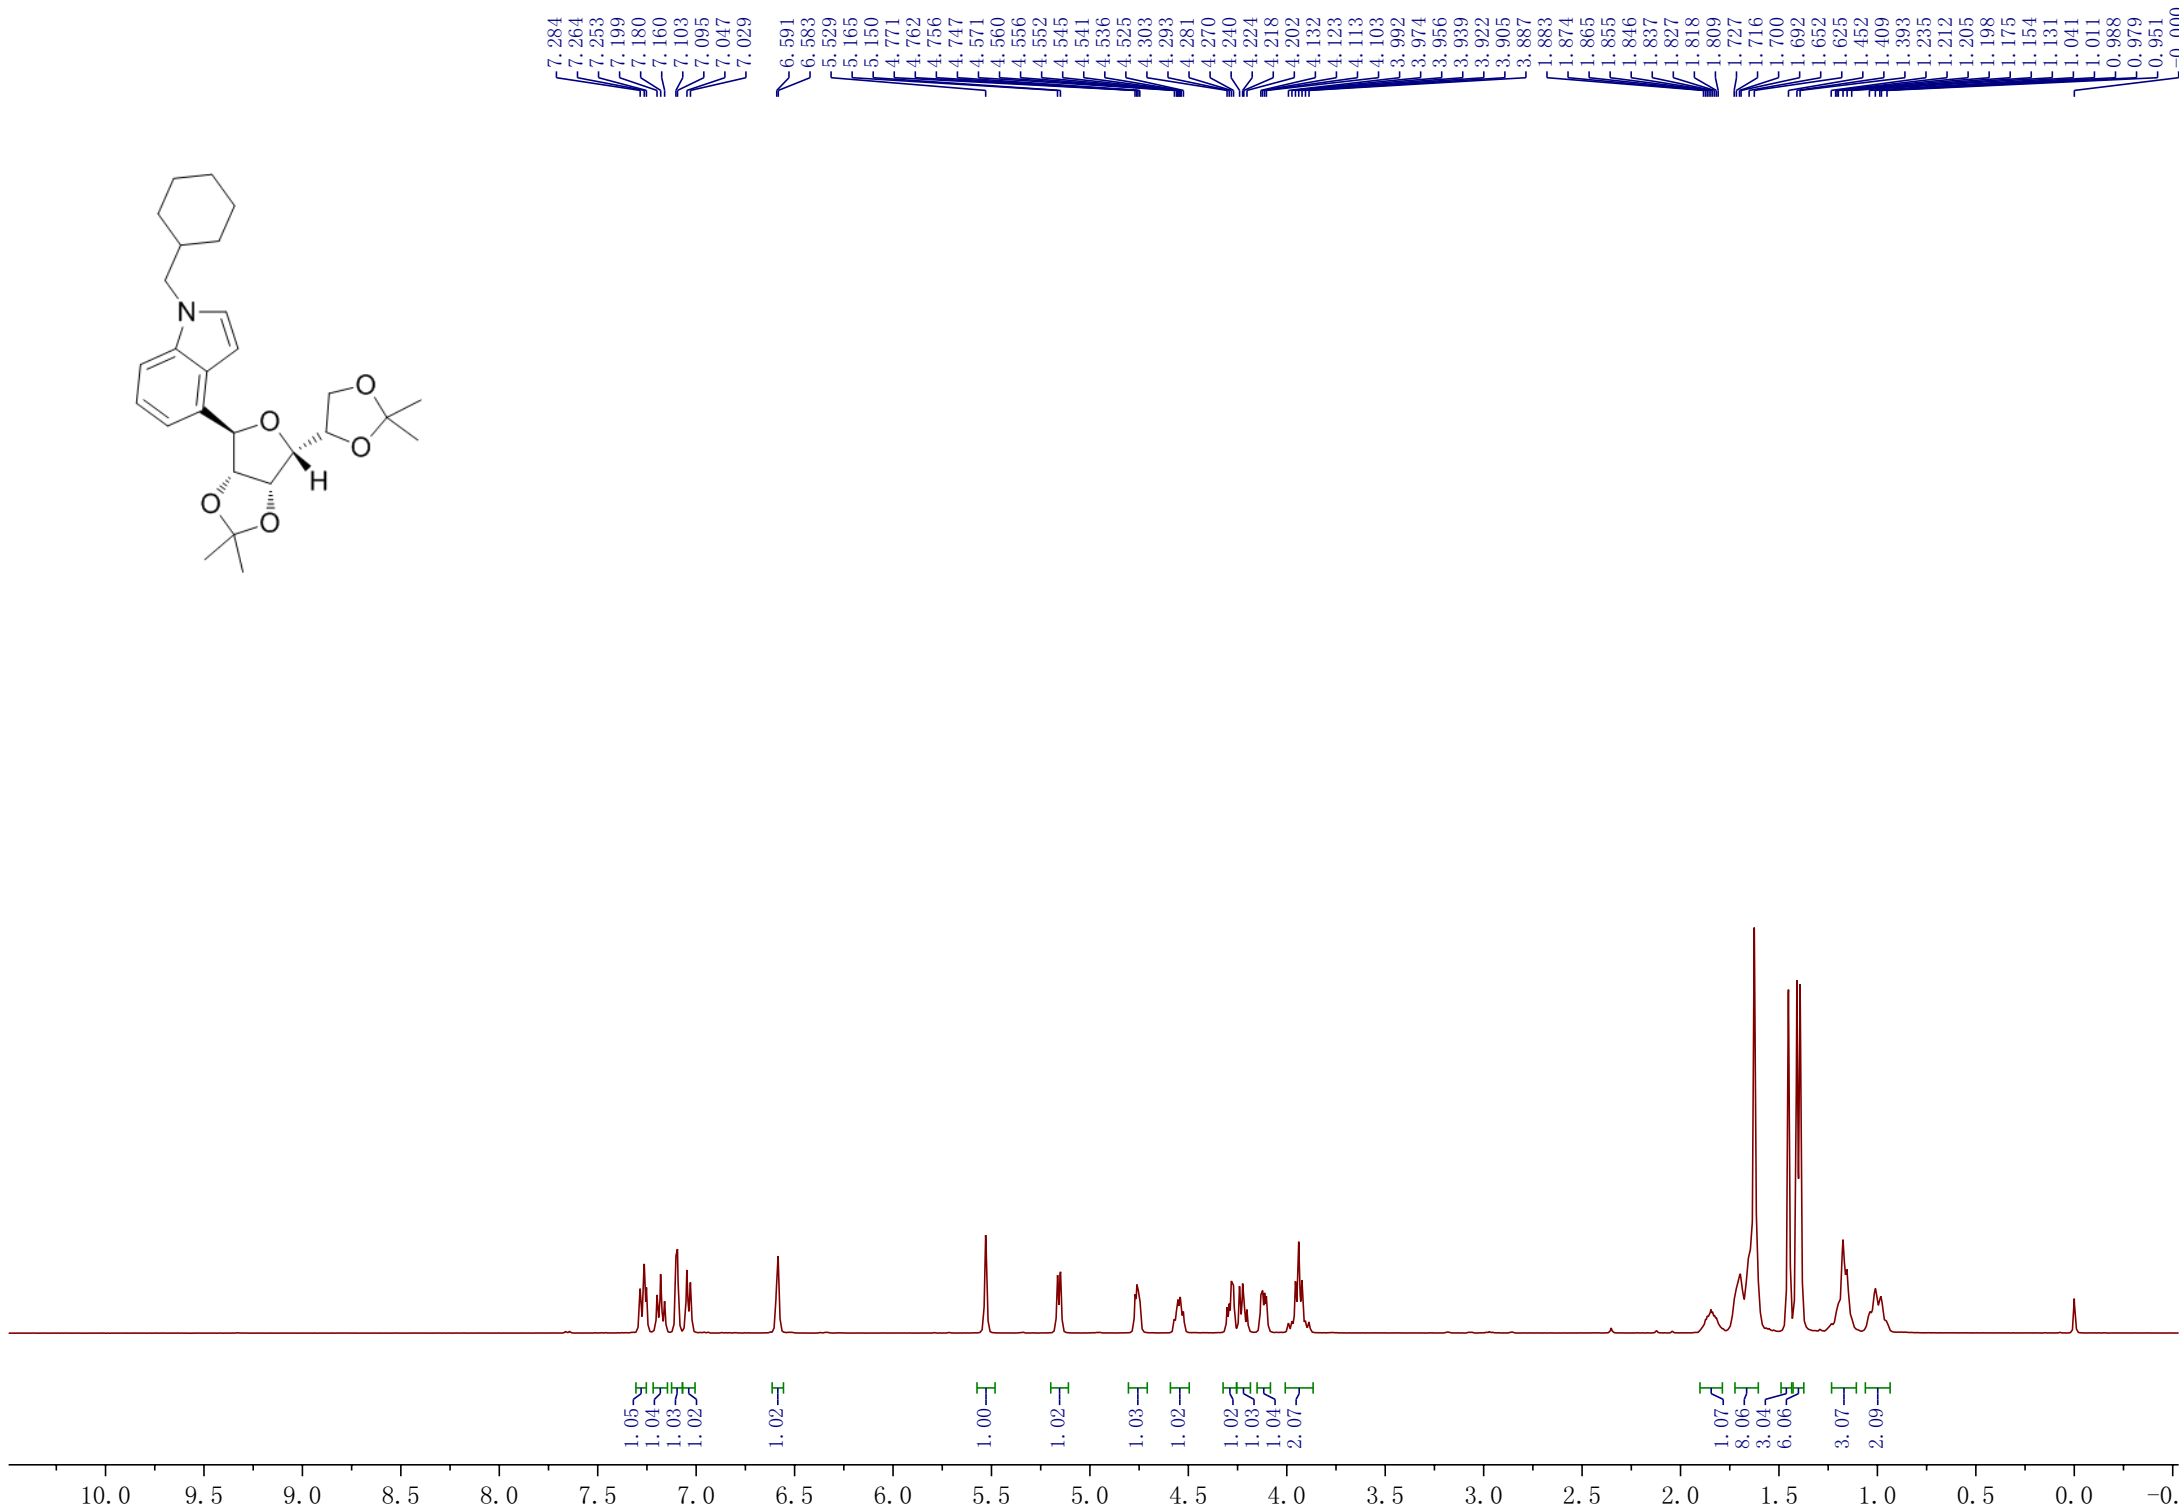

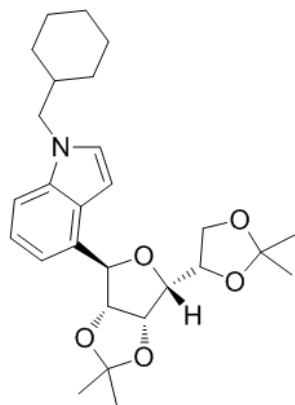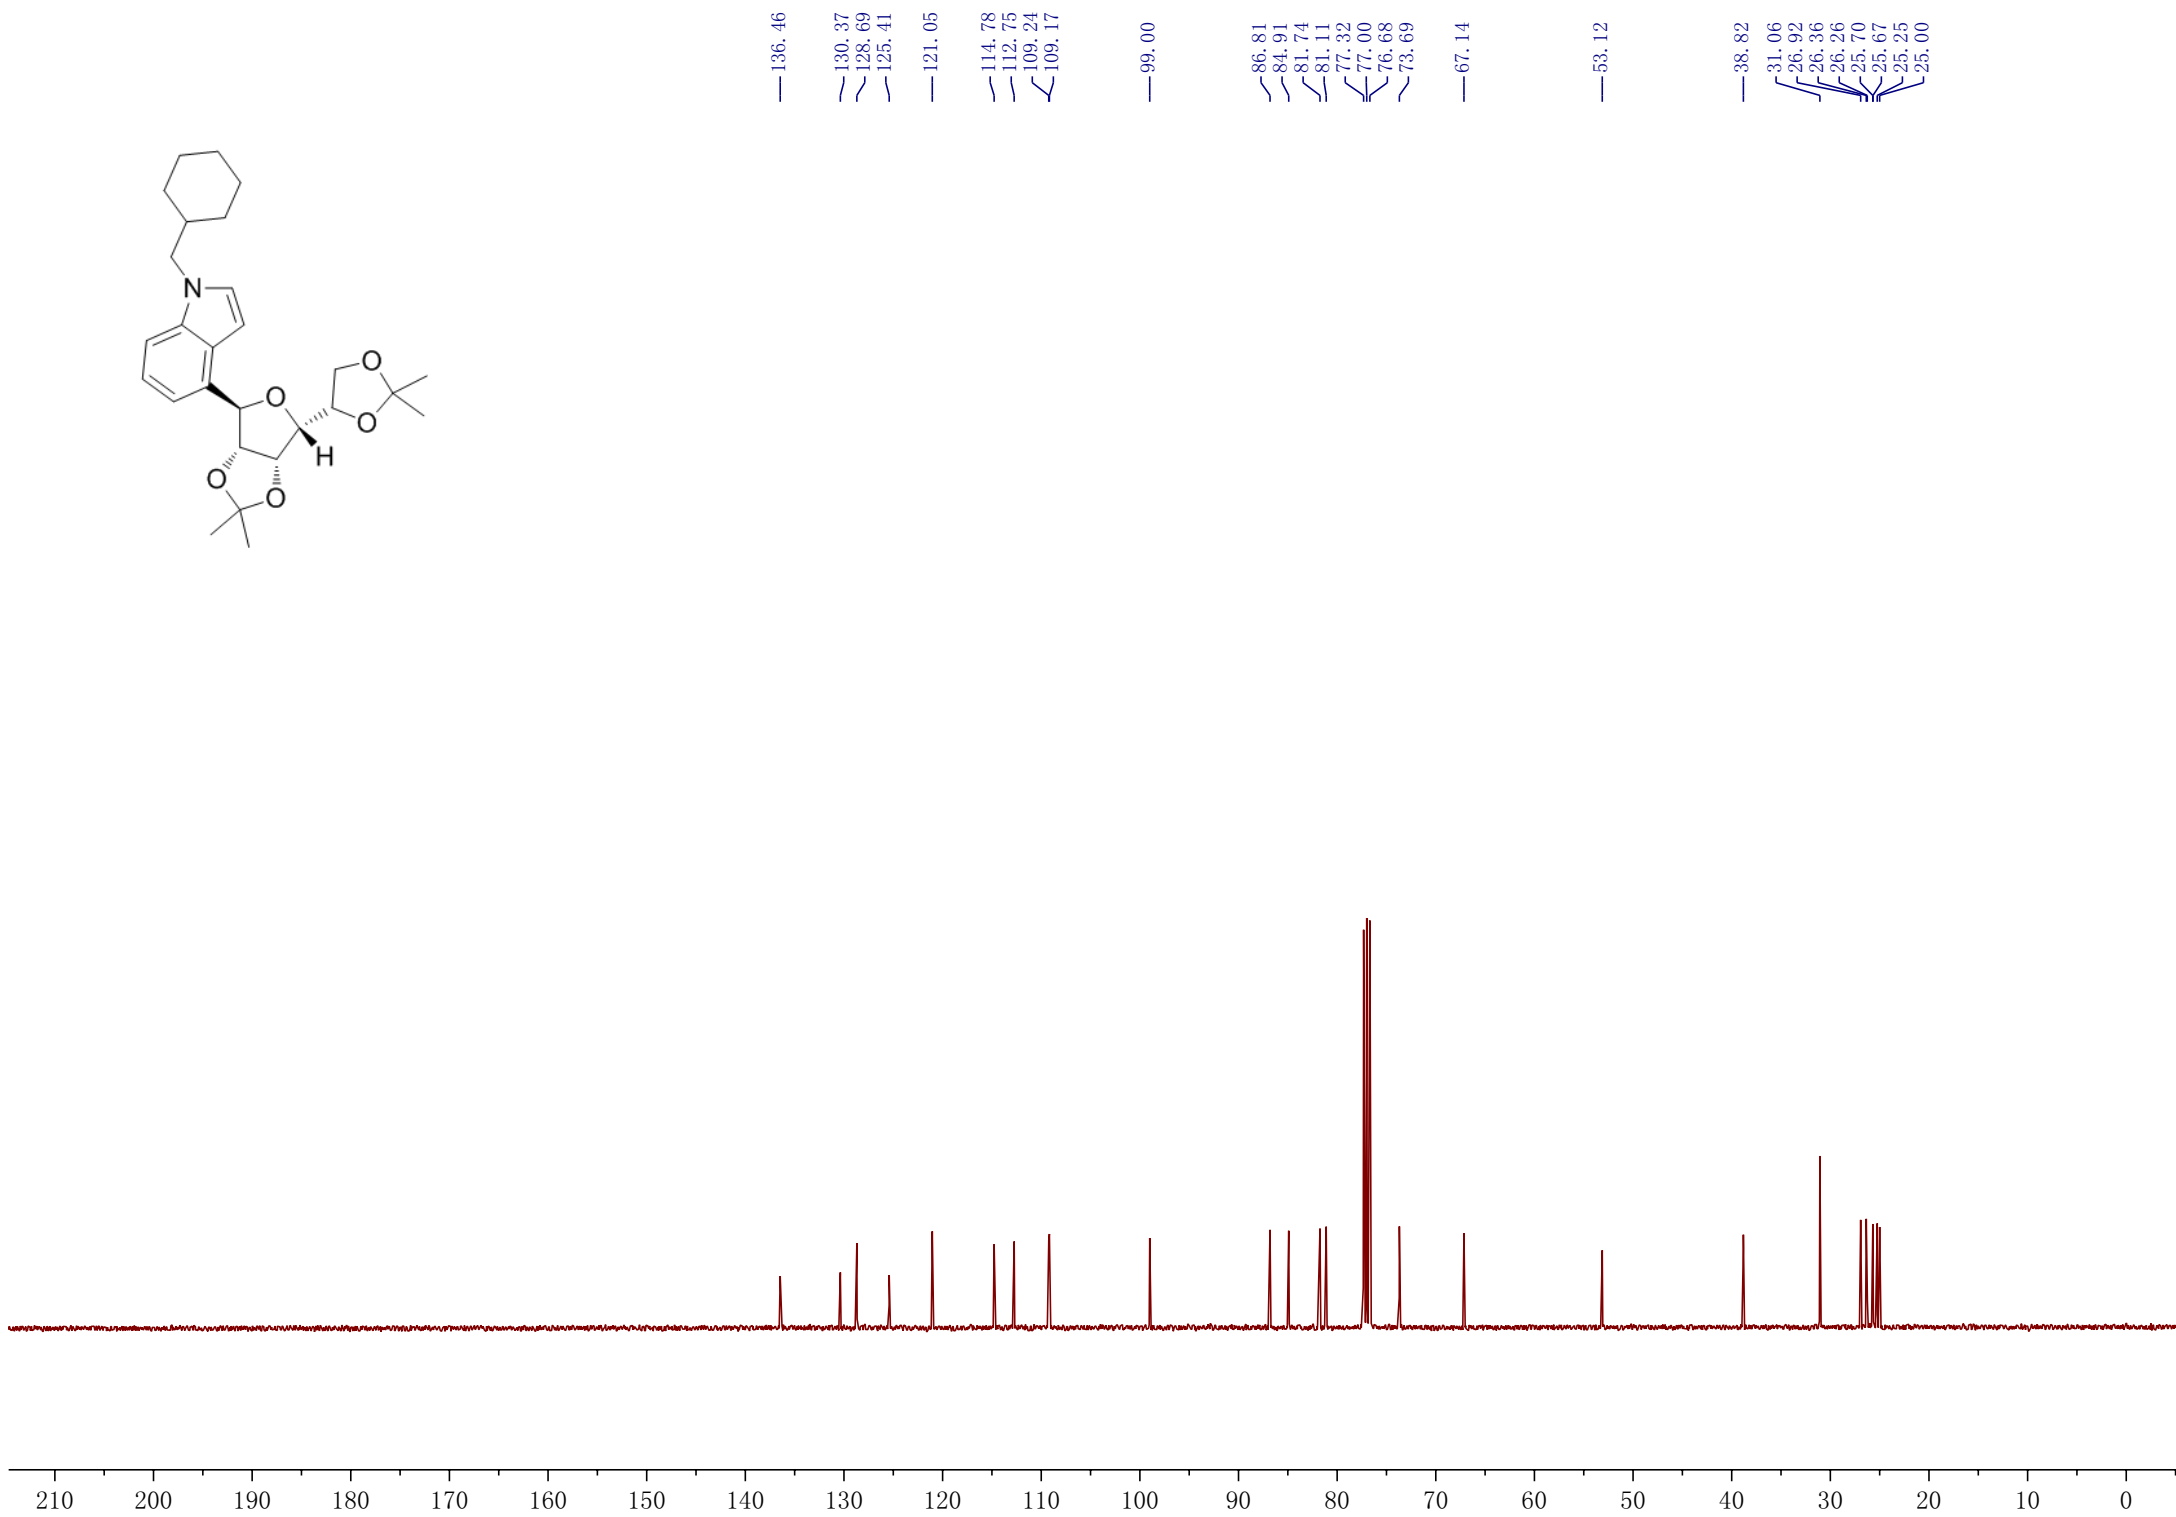

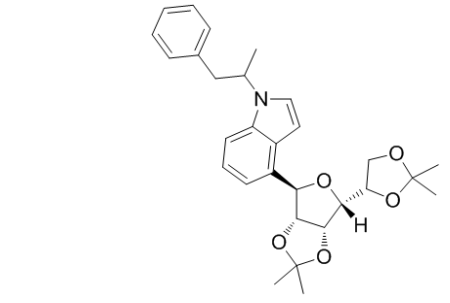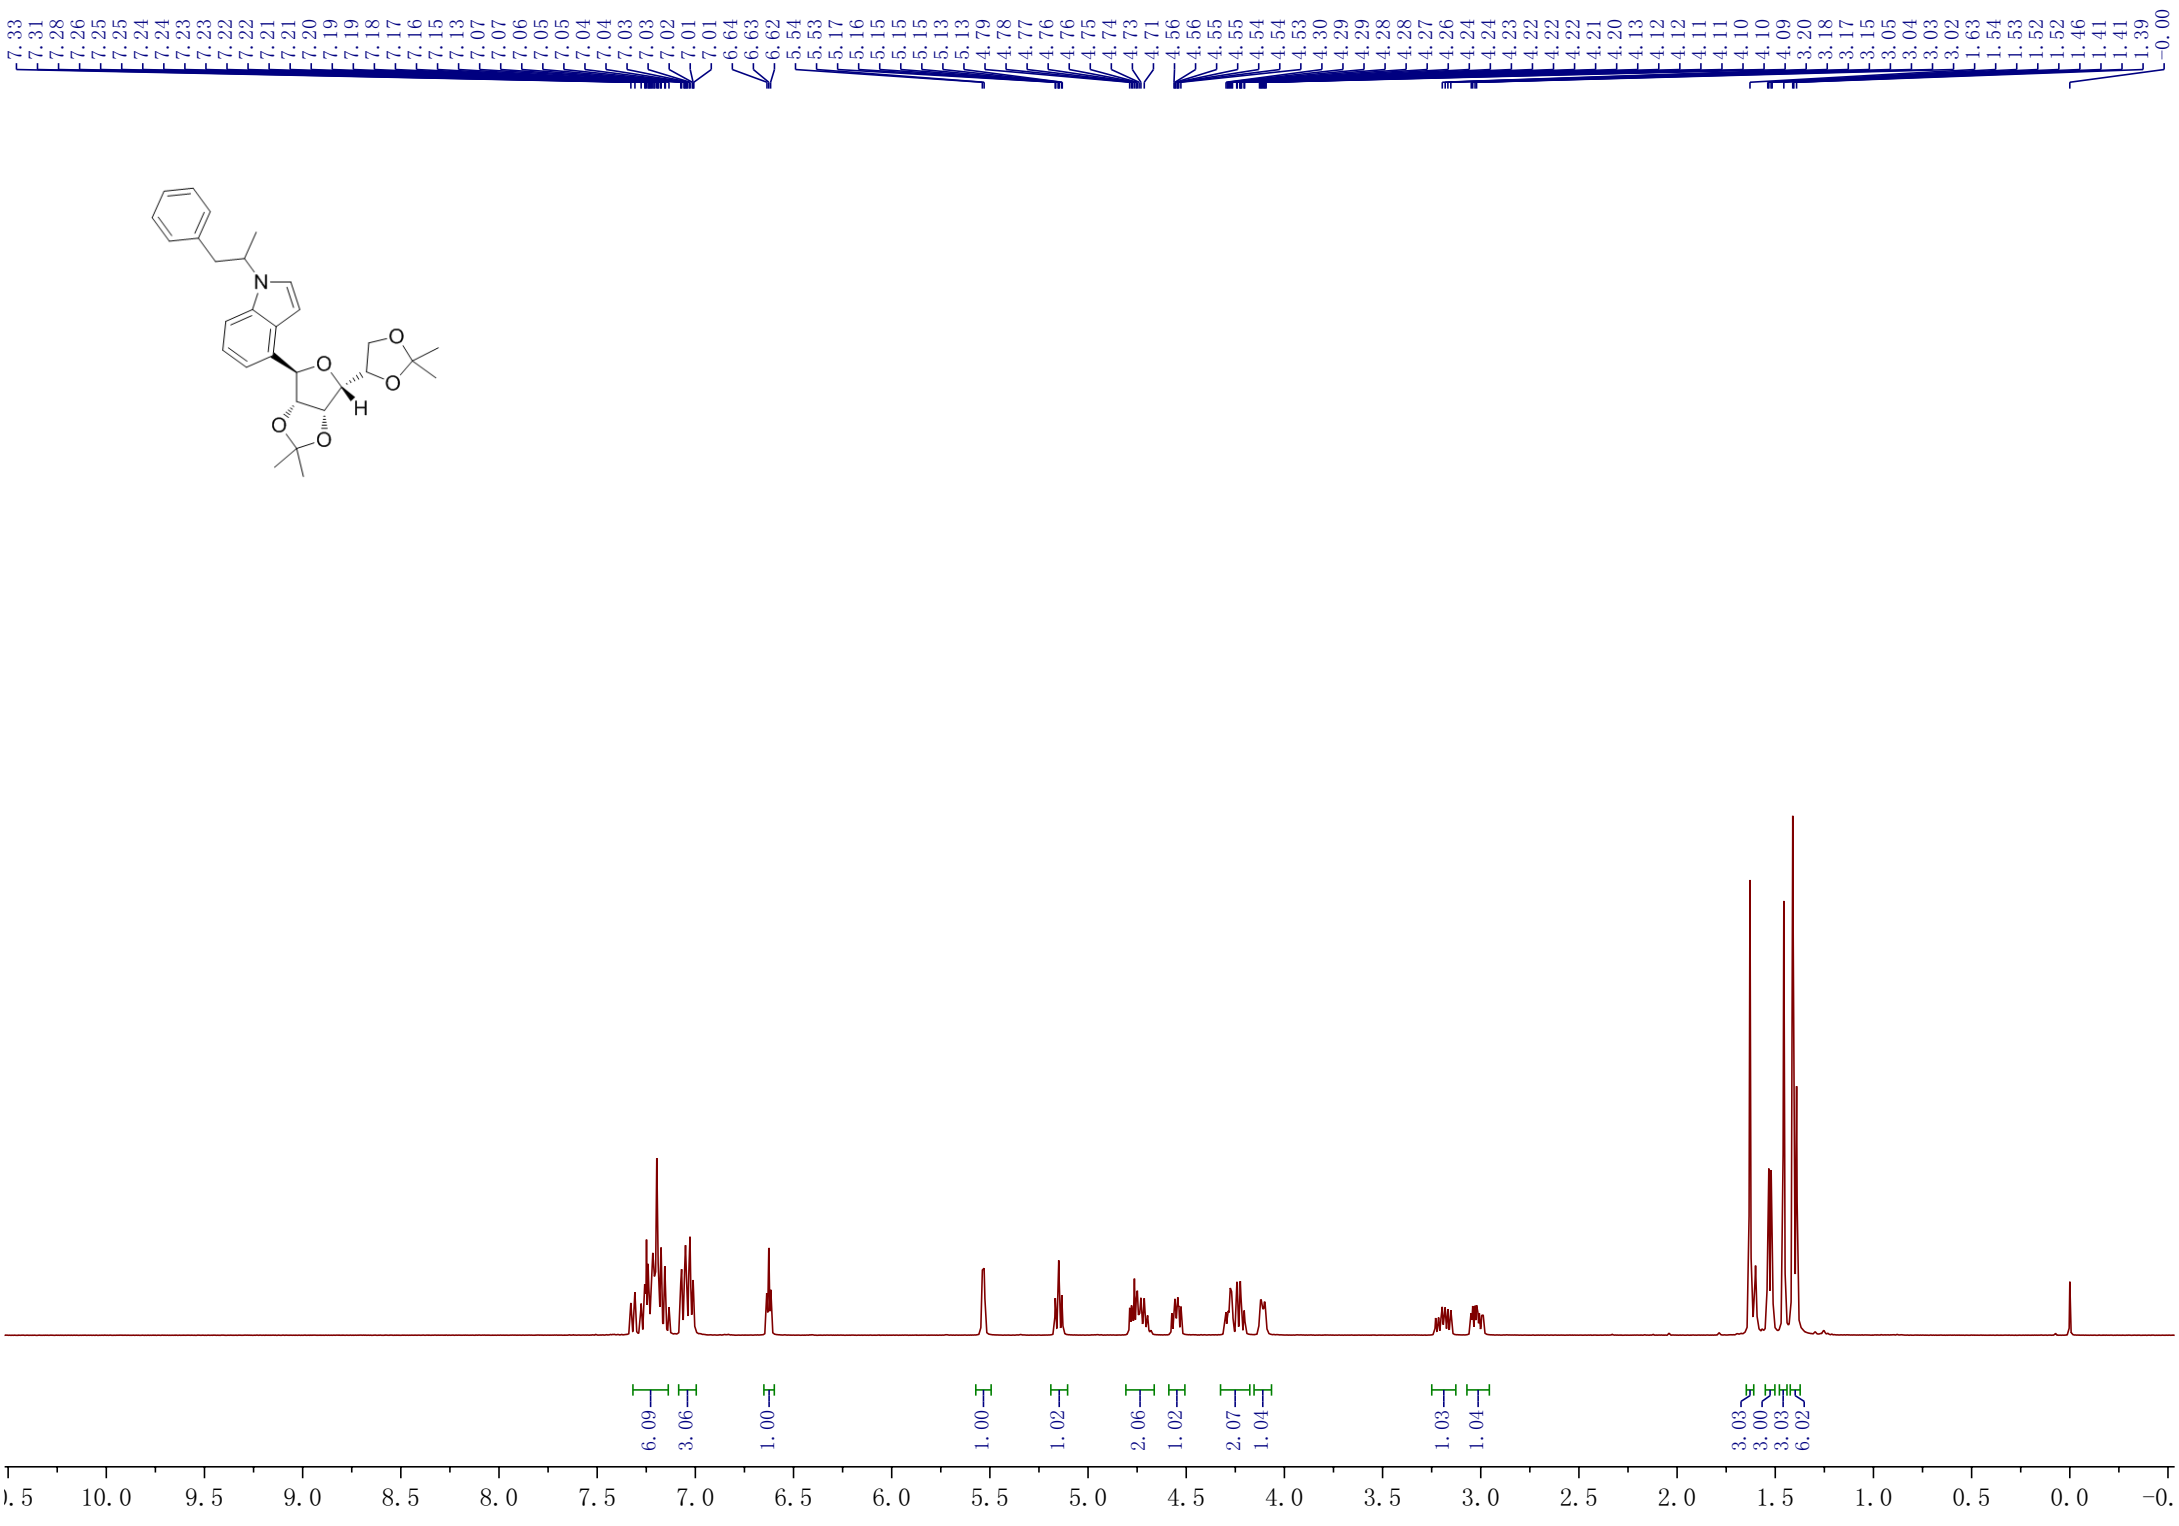

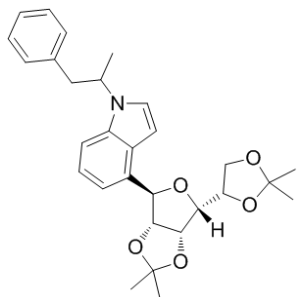

- 137.92  
137.86  
135.91  
135.82  
130.49  
130.43  
129.11  
128.44  
128.40  
126.61  
125.60  
125.43  
124.43  
124.25  
121.09  
115.04  
114.97  
112.77  
109.19  
109.10  
109.03  
99.78  
99.72  
86.81  
84.91  
81.76  
81.15  
81.12  
77.32  
77.00  
76.68  
73.69  
67.16  
53.17  
53.08  
43.46  
43.40  
26.94  
26.38  
25.26  
25.07  
25.02  
20.10  
19.99

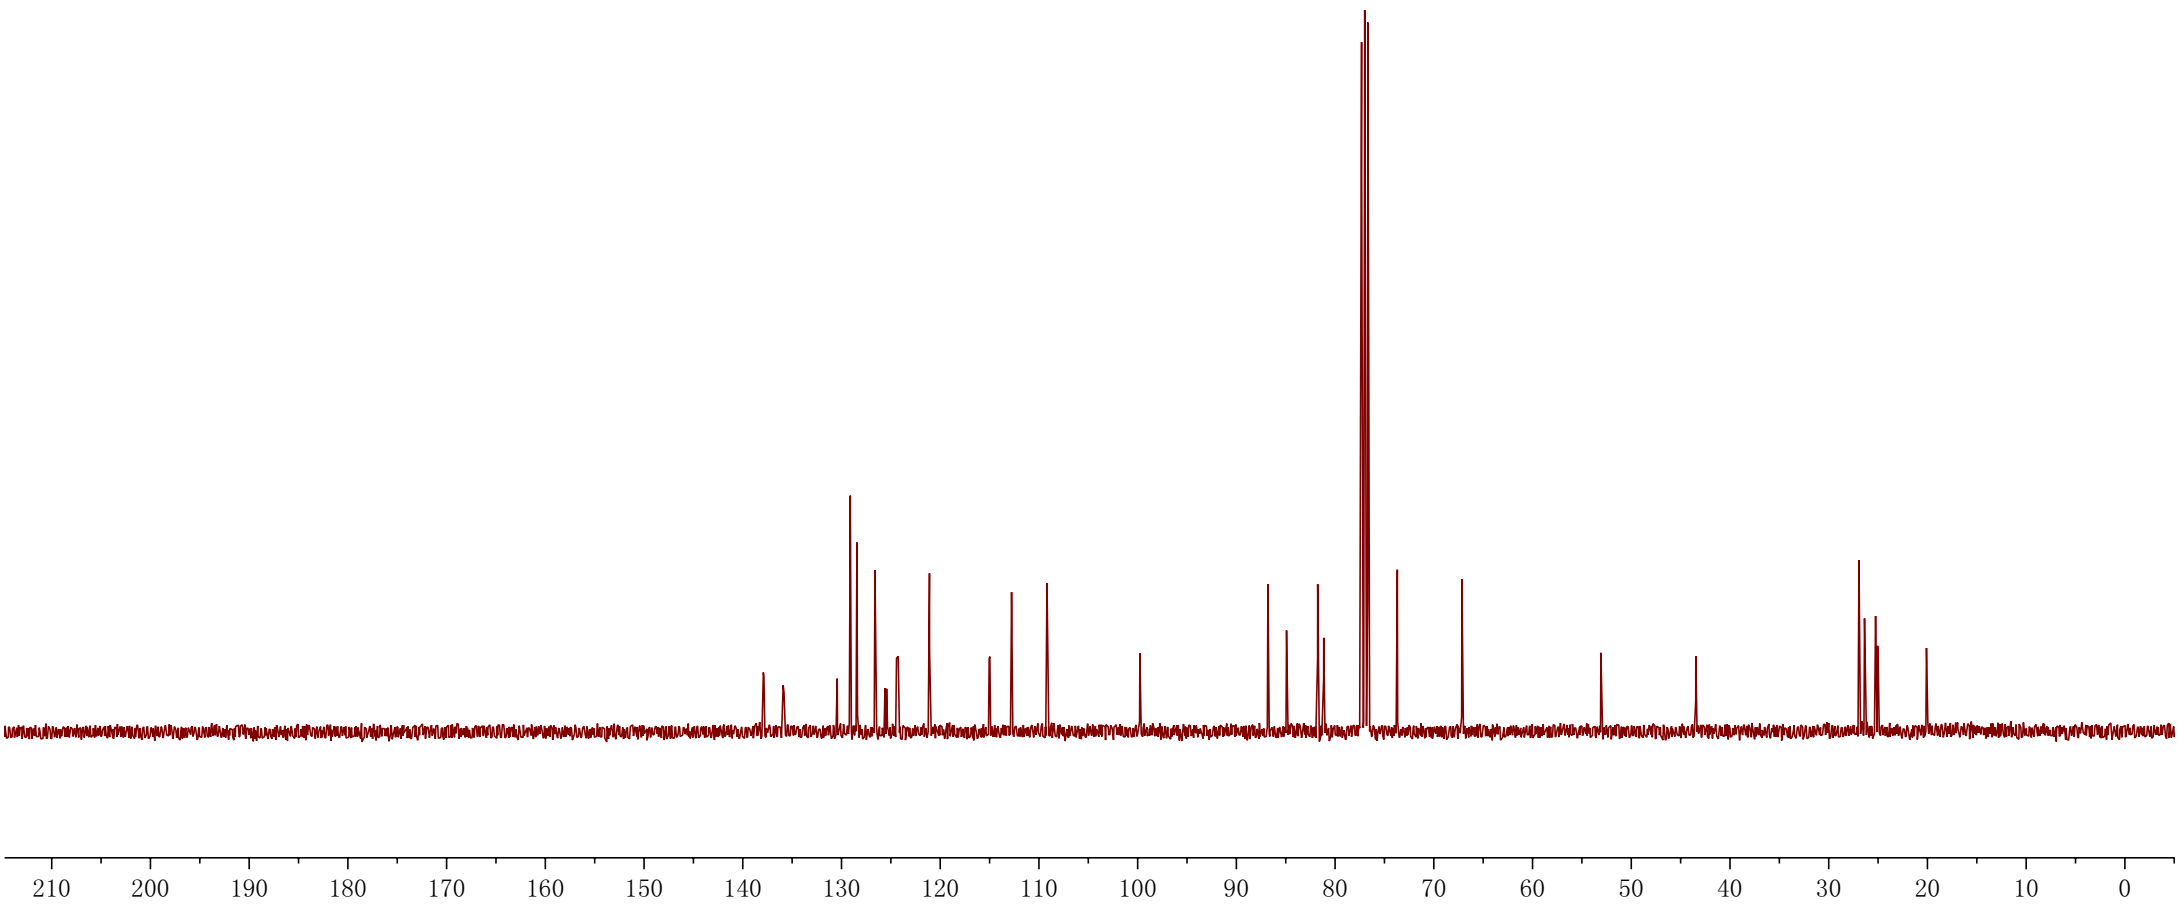



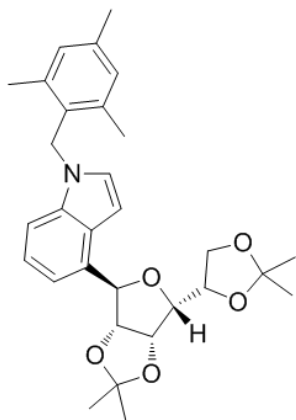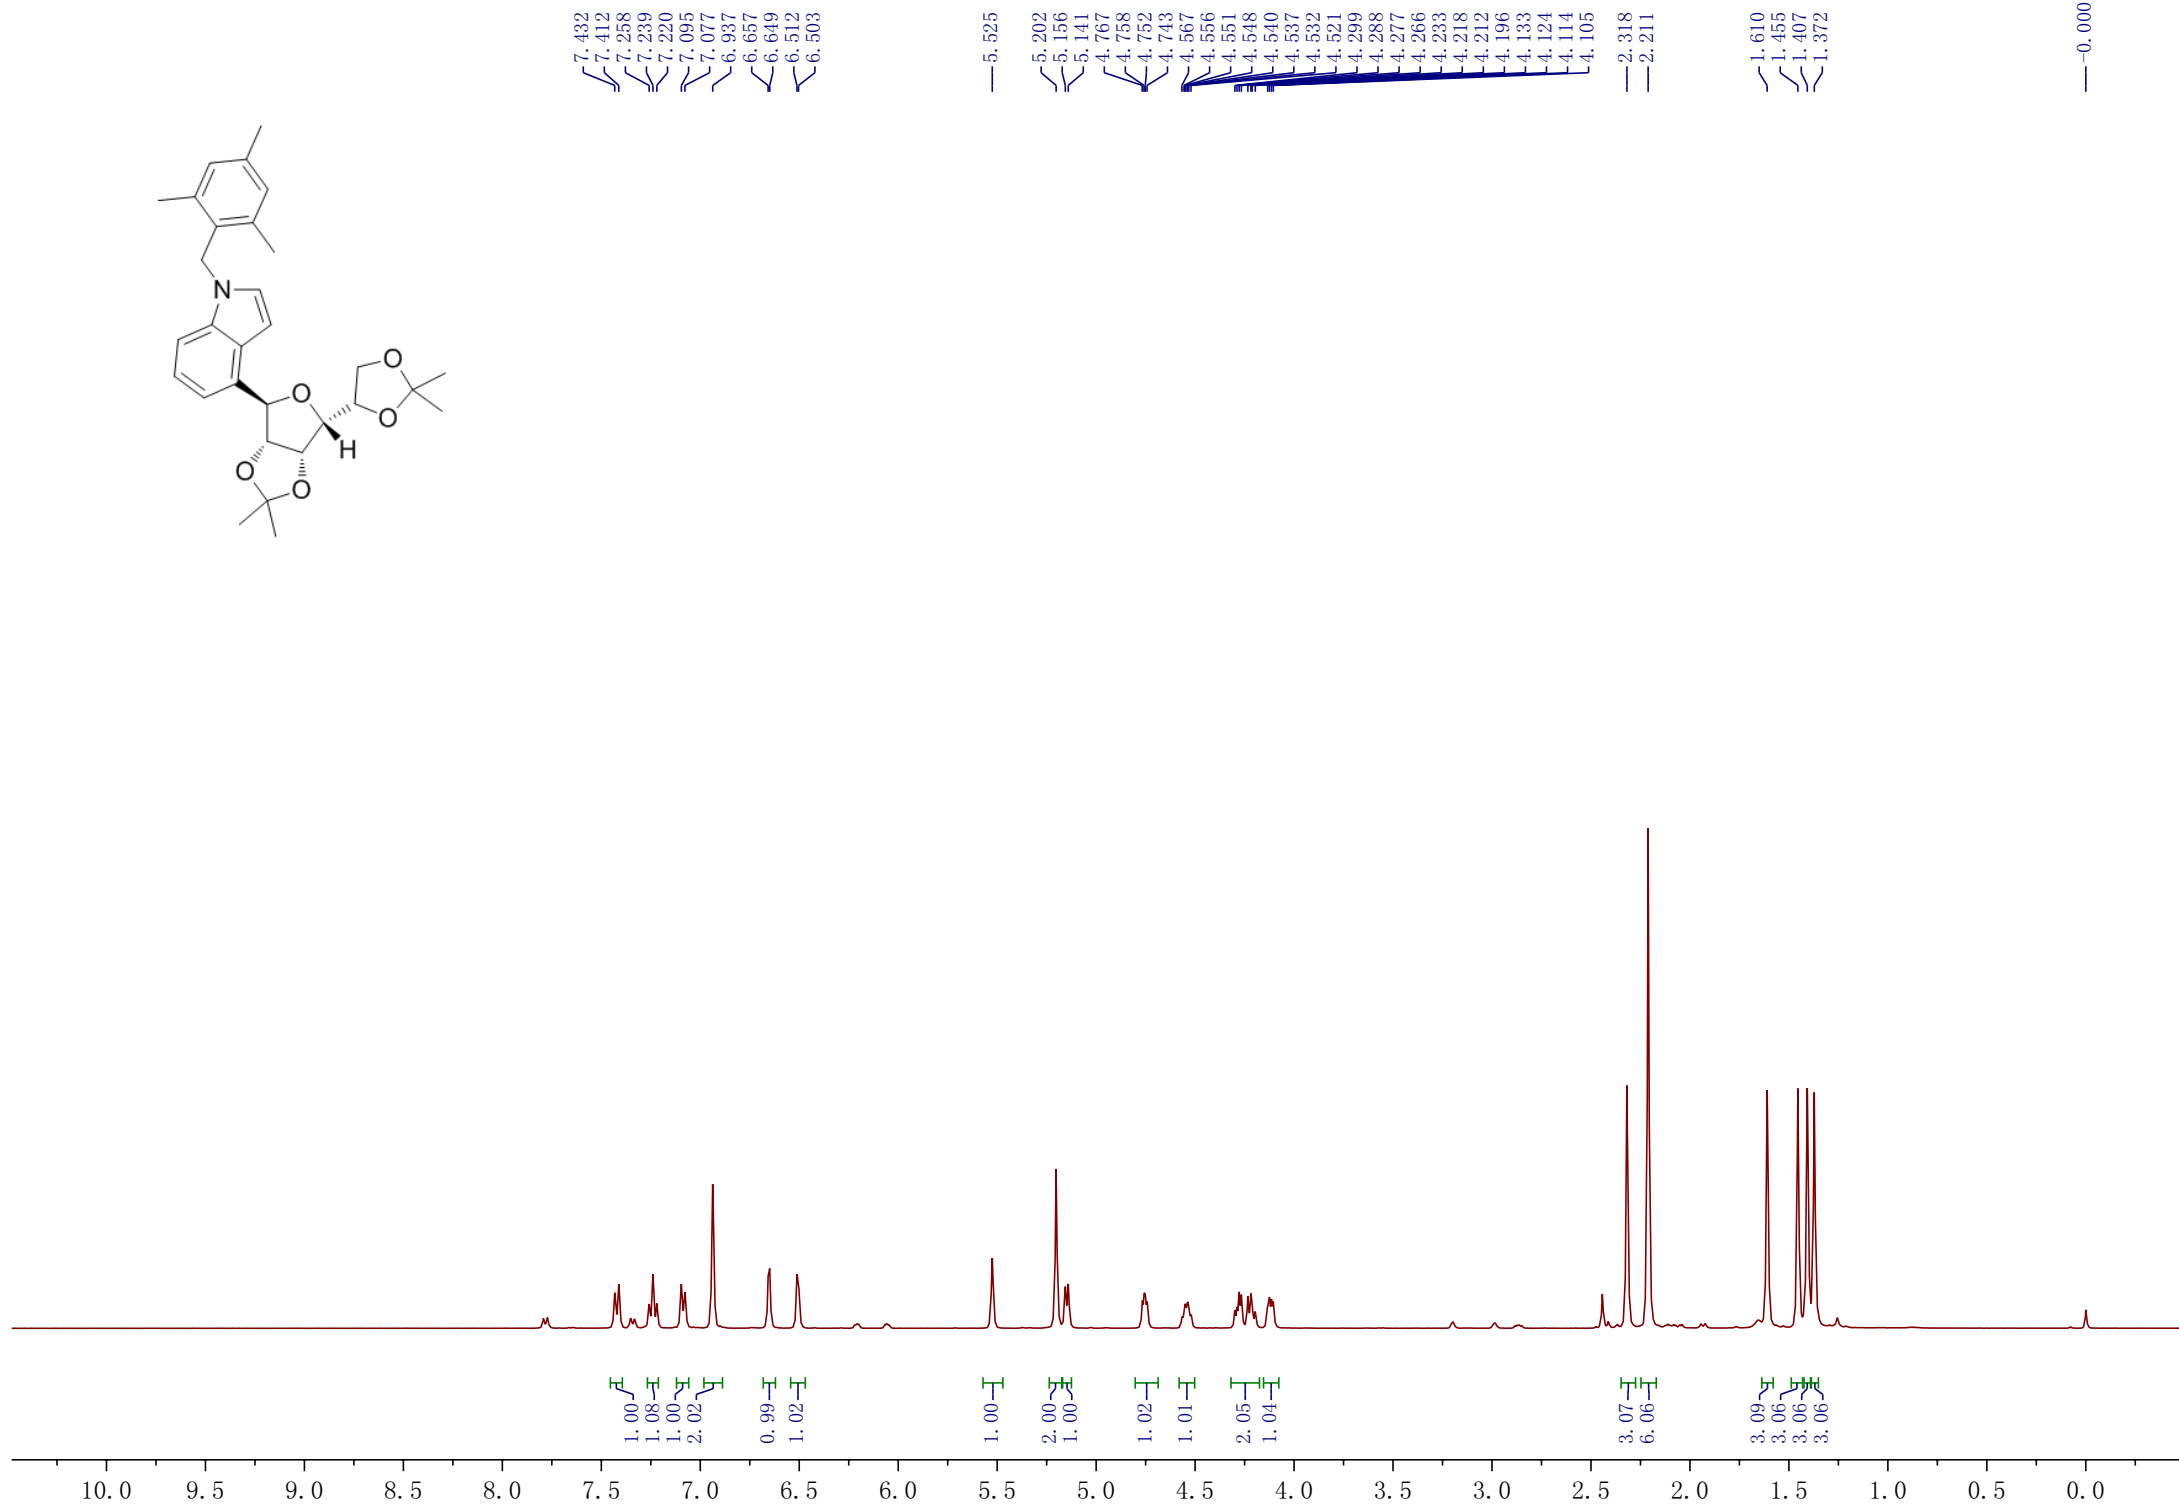

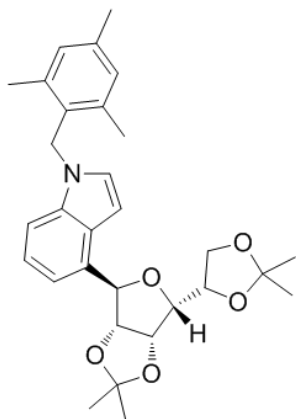

138.120  
138.004  
136.585  
130.412  
129.359  
128.661  
126.063  
125.822  
121.195

115.229  
112.716  
109.151  
108.830

99.300

86.764  
84.841  
81.713  
81.079  
77.318  
77.000  
76.683  
73.689

67.115

43.806

26.917  
26.316  
25.241  
24.930  
20.992  
19.584

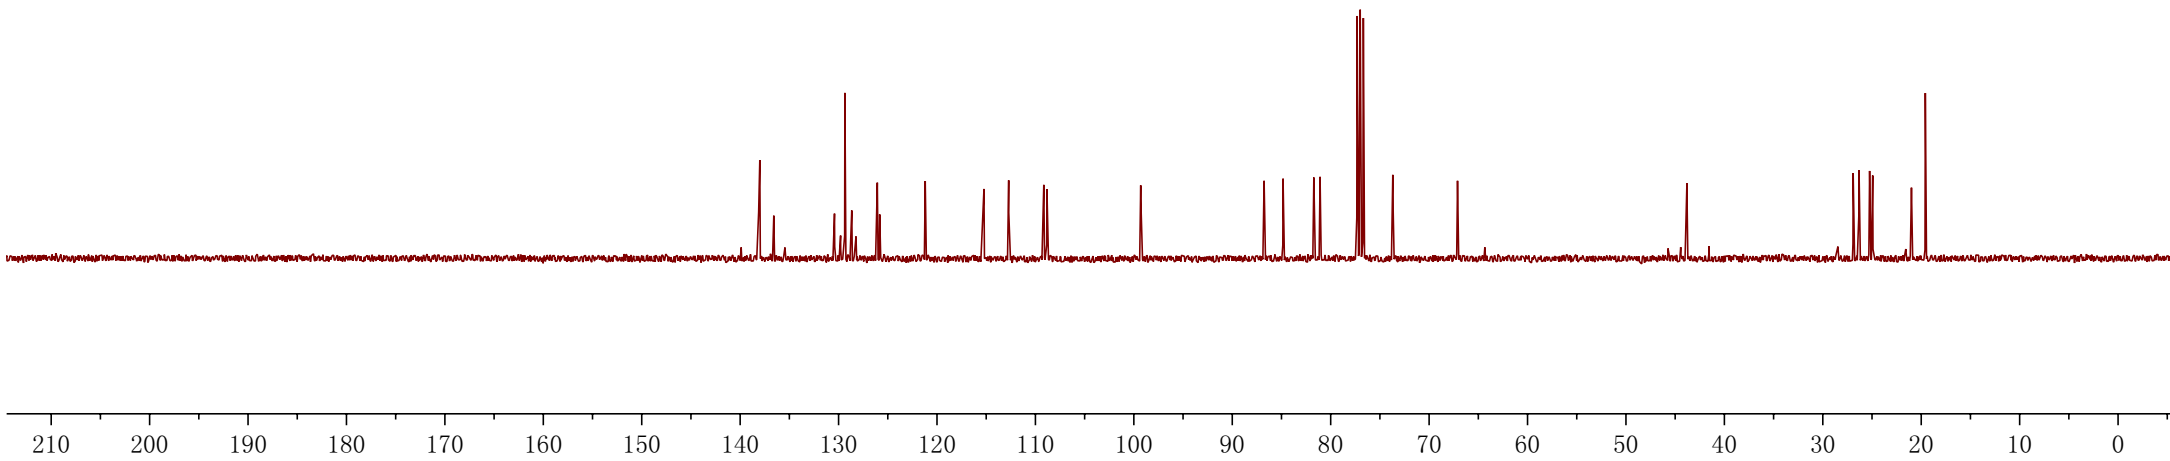



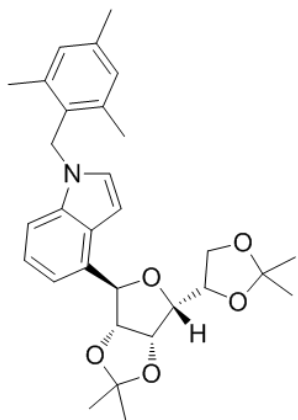

138.120  
138.004  
136.585  
130.412  
129.359  
128.661  
126.063  
125.822  
121.195

115.229  
112.716  
109.151  
108.830

99.300

86.764  
84.841  
81.713  
81.079  
77.318  
77.000  
76.683  
73.689

67.115

43.806

26.917  
26.316  
25.241  
24.930  
20.992  
19.584

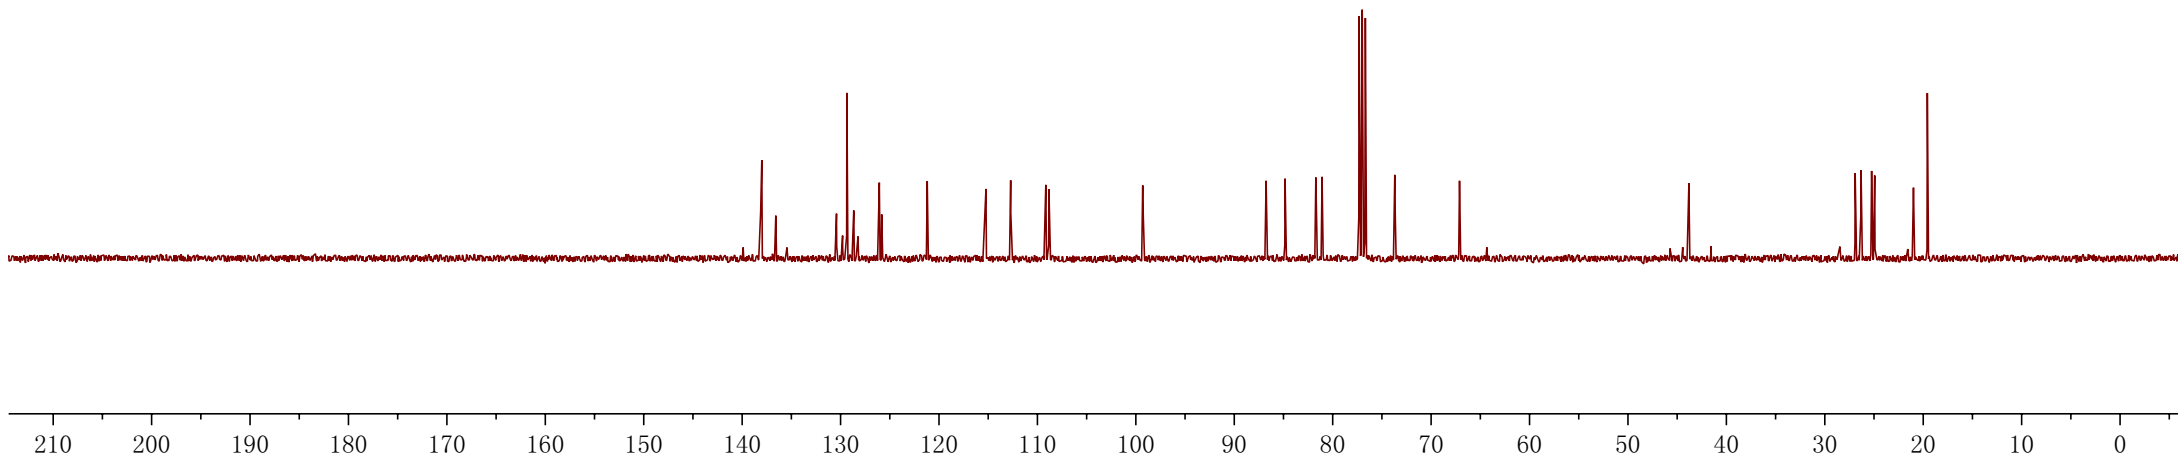

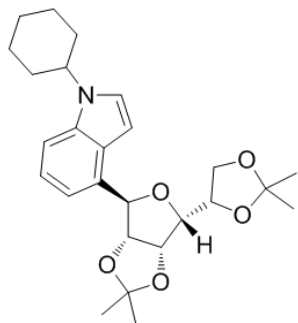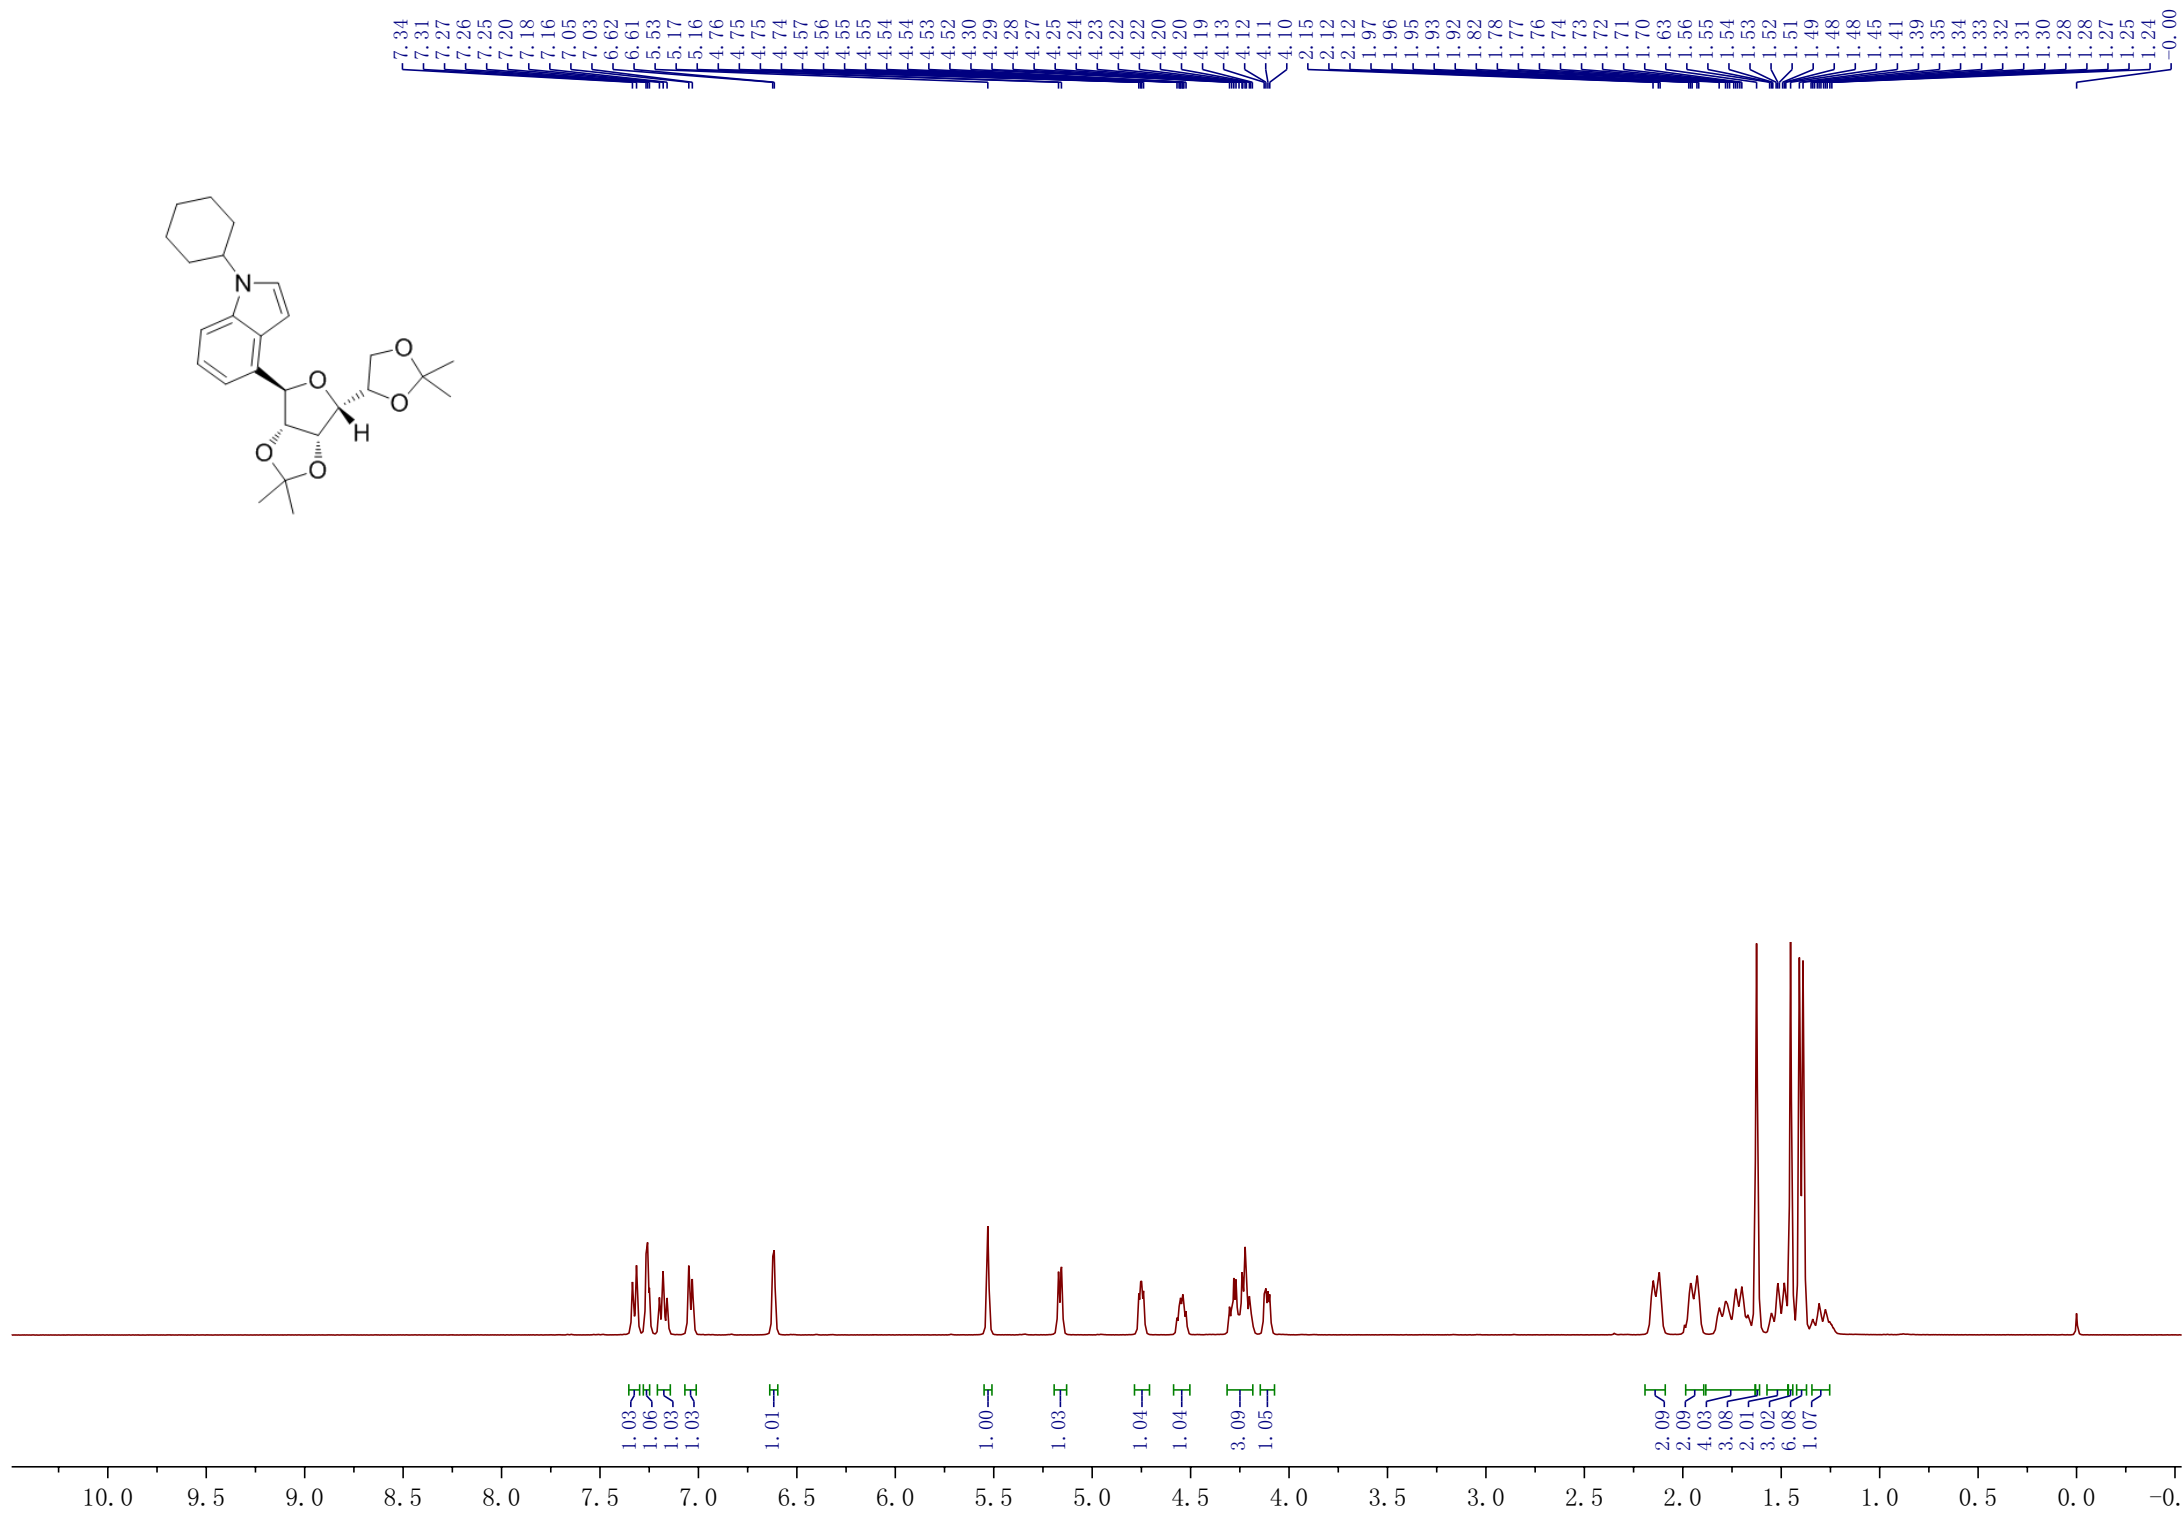

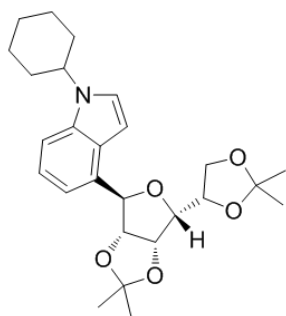

- 135.71
- 130.36
- 125.36
- 124.19
- 120.93
- 114.92
- 112.73
- 109.17
- 109.03
- 99.37
- 86.76
- 84.91
- 81.73
- 81.10
- 77.32
- 77.00
- 76.68
- 73.69
- 67.15
- 55.25
- 33.63
- 33.49
- 26.93
- 26.34
- 25.93
- 25.59
- 25.25
- 24.97

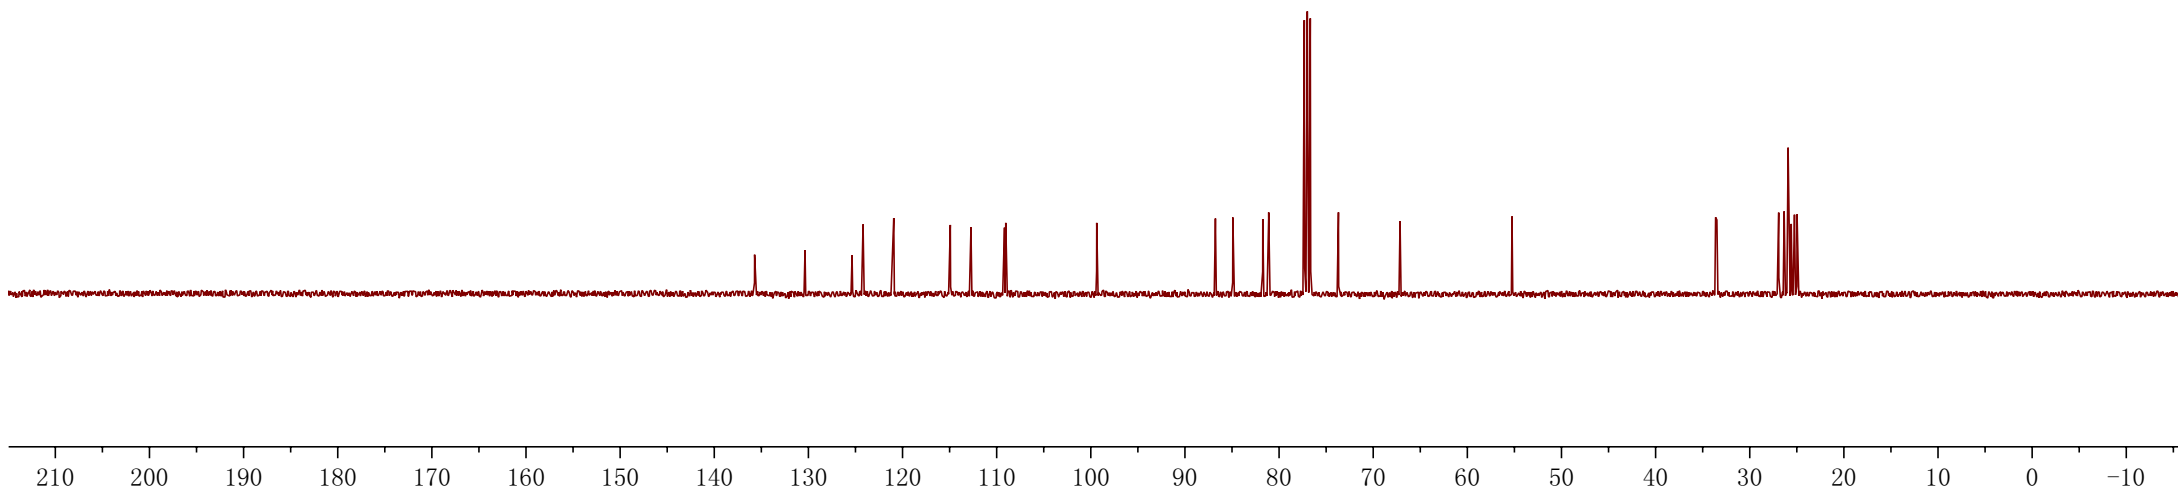

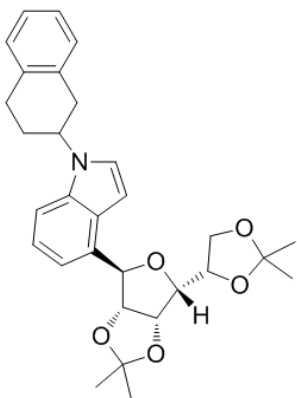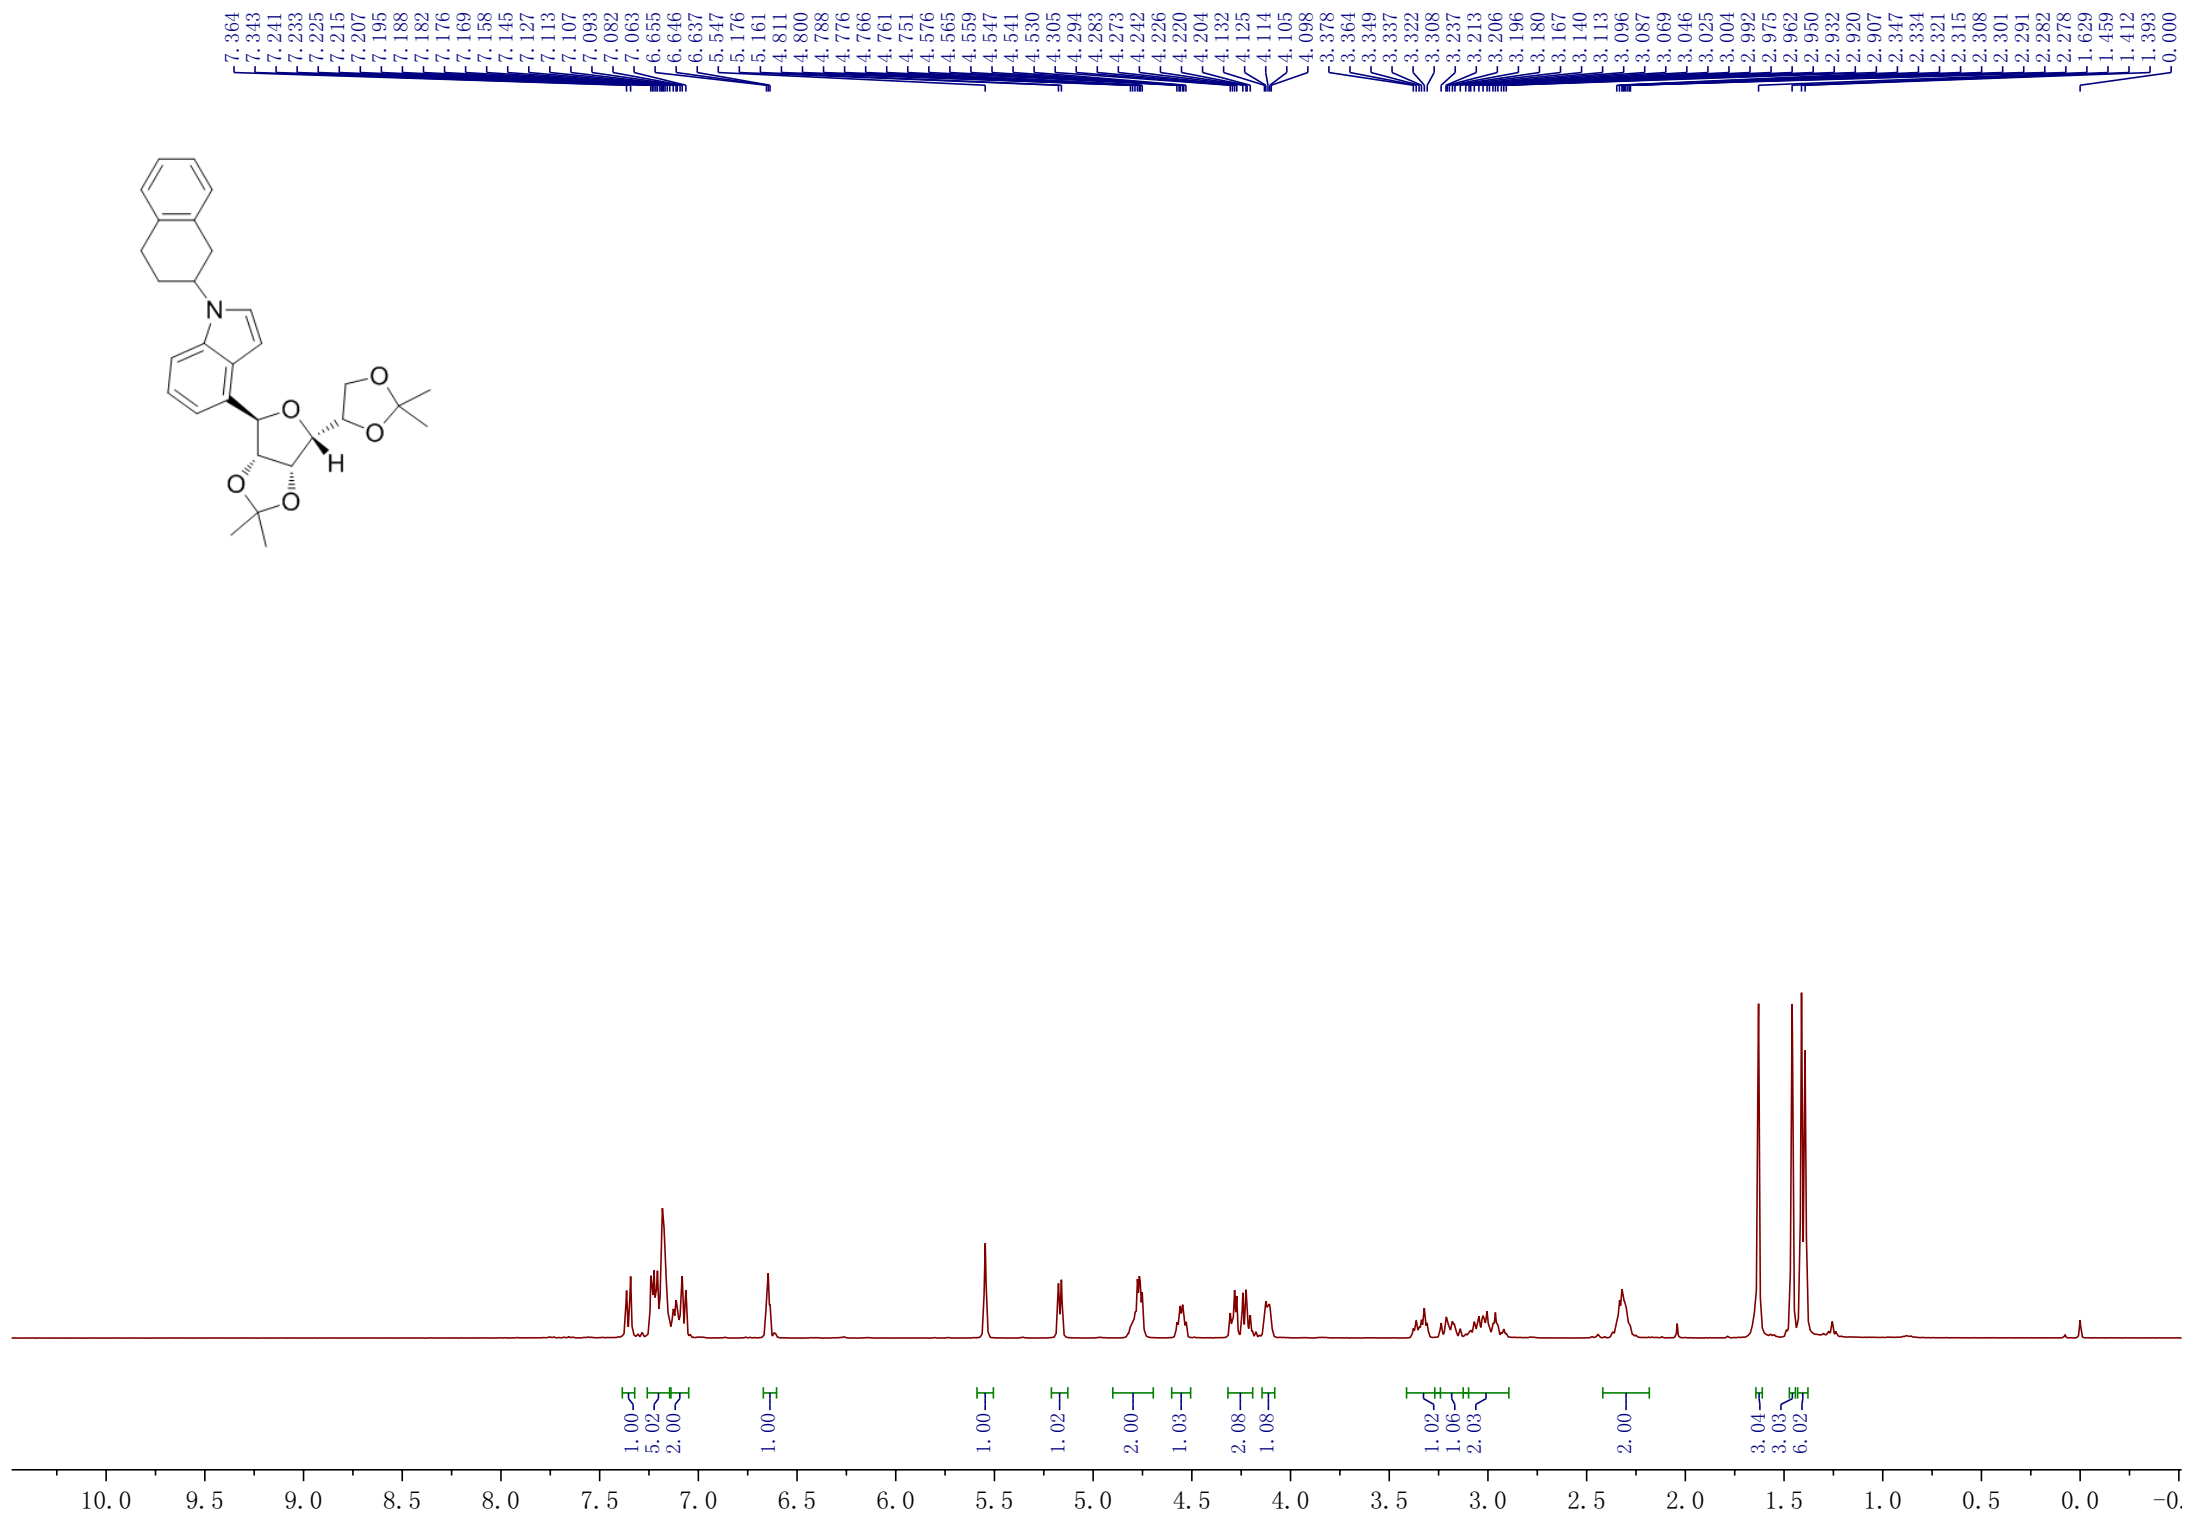

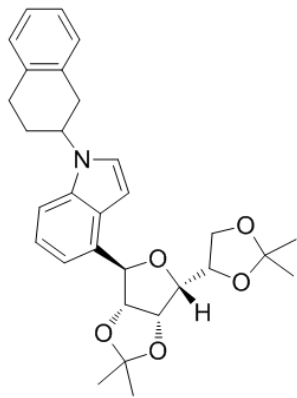

135.915  
135.298  
135.270  
134.239  
130.543  
129.094  
128.878  
126.422  
126.403  
126.159  
126.123  
125.534  
124.427  
124.292  
121.254  
121.237  
115.185  
112.758  
109.168  
109.028  
109.003

99.926  
99.866

86.735  
84.852  
81.717  
81.087  
77.318  
77.000  
76.683  
73.674

67.120

51.824  
51.714

36.268  
35.984  
29.448  
29.427  
28.676  
28.434  
26.928  
26.341  
25.230  
24.955

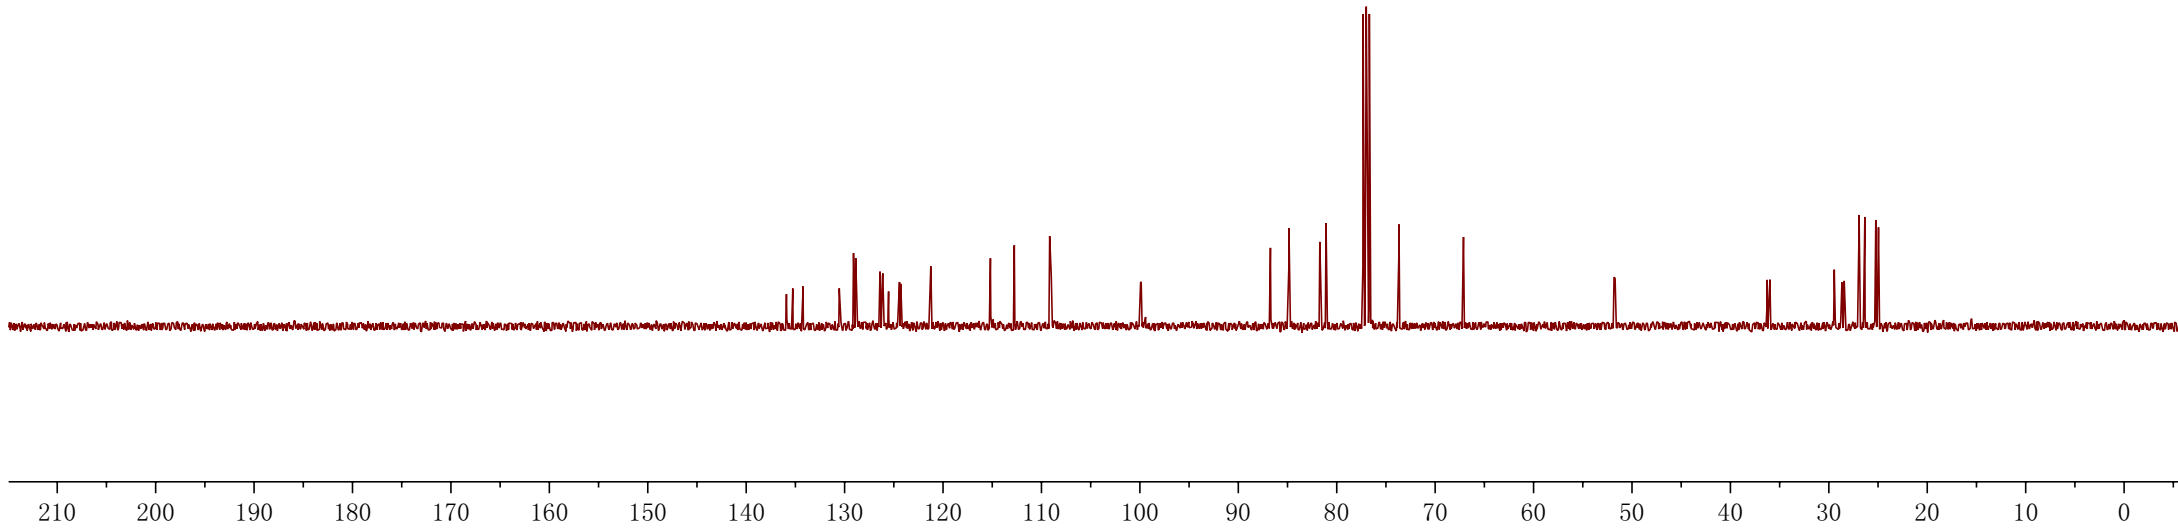



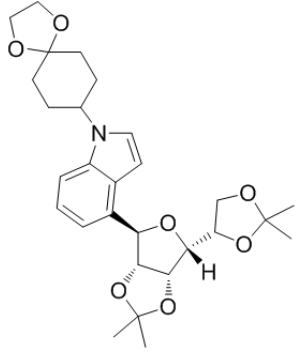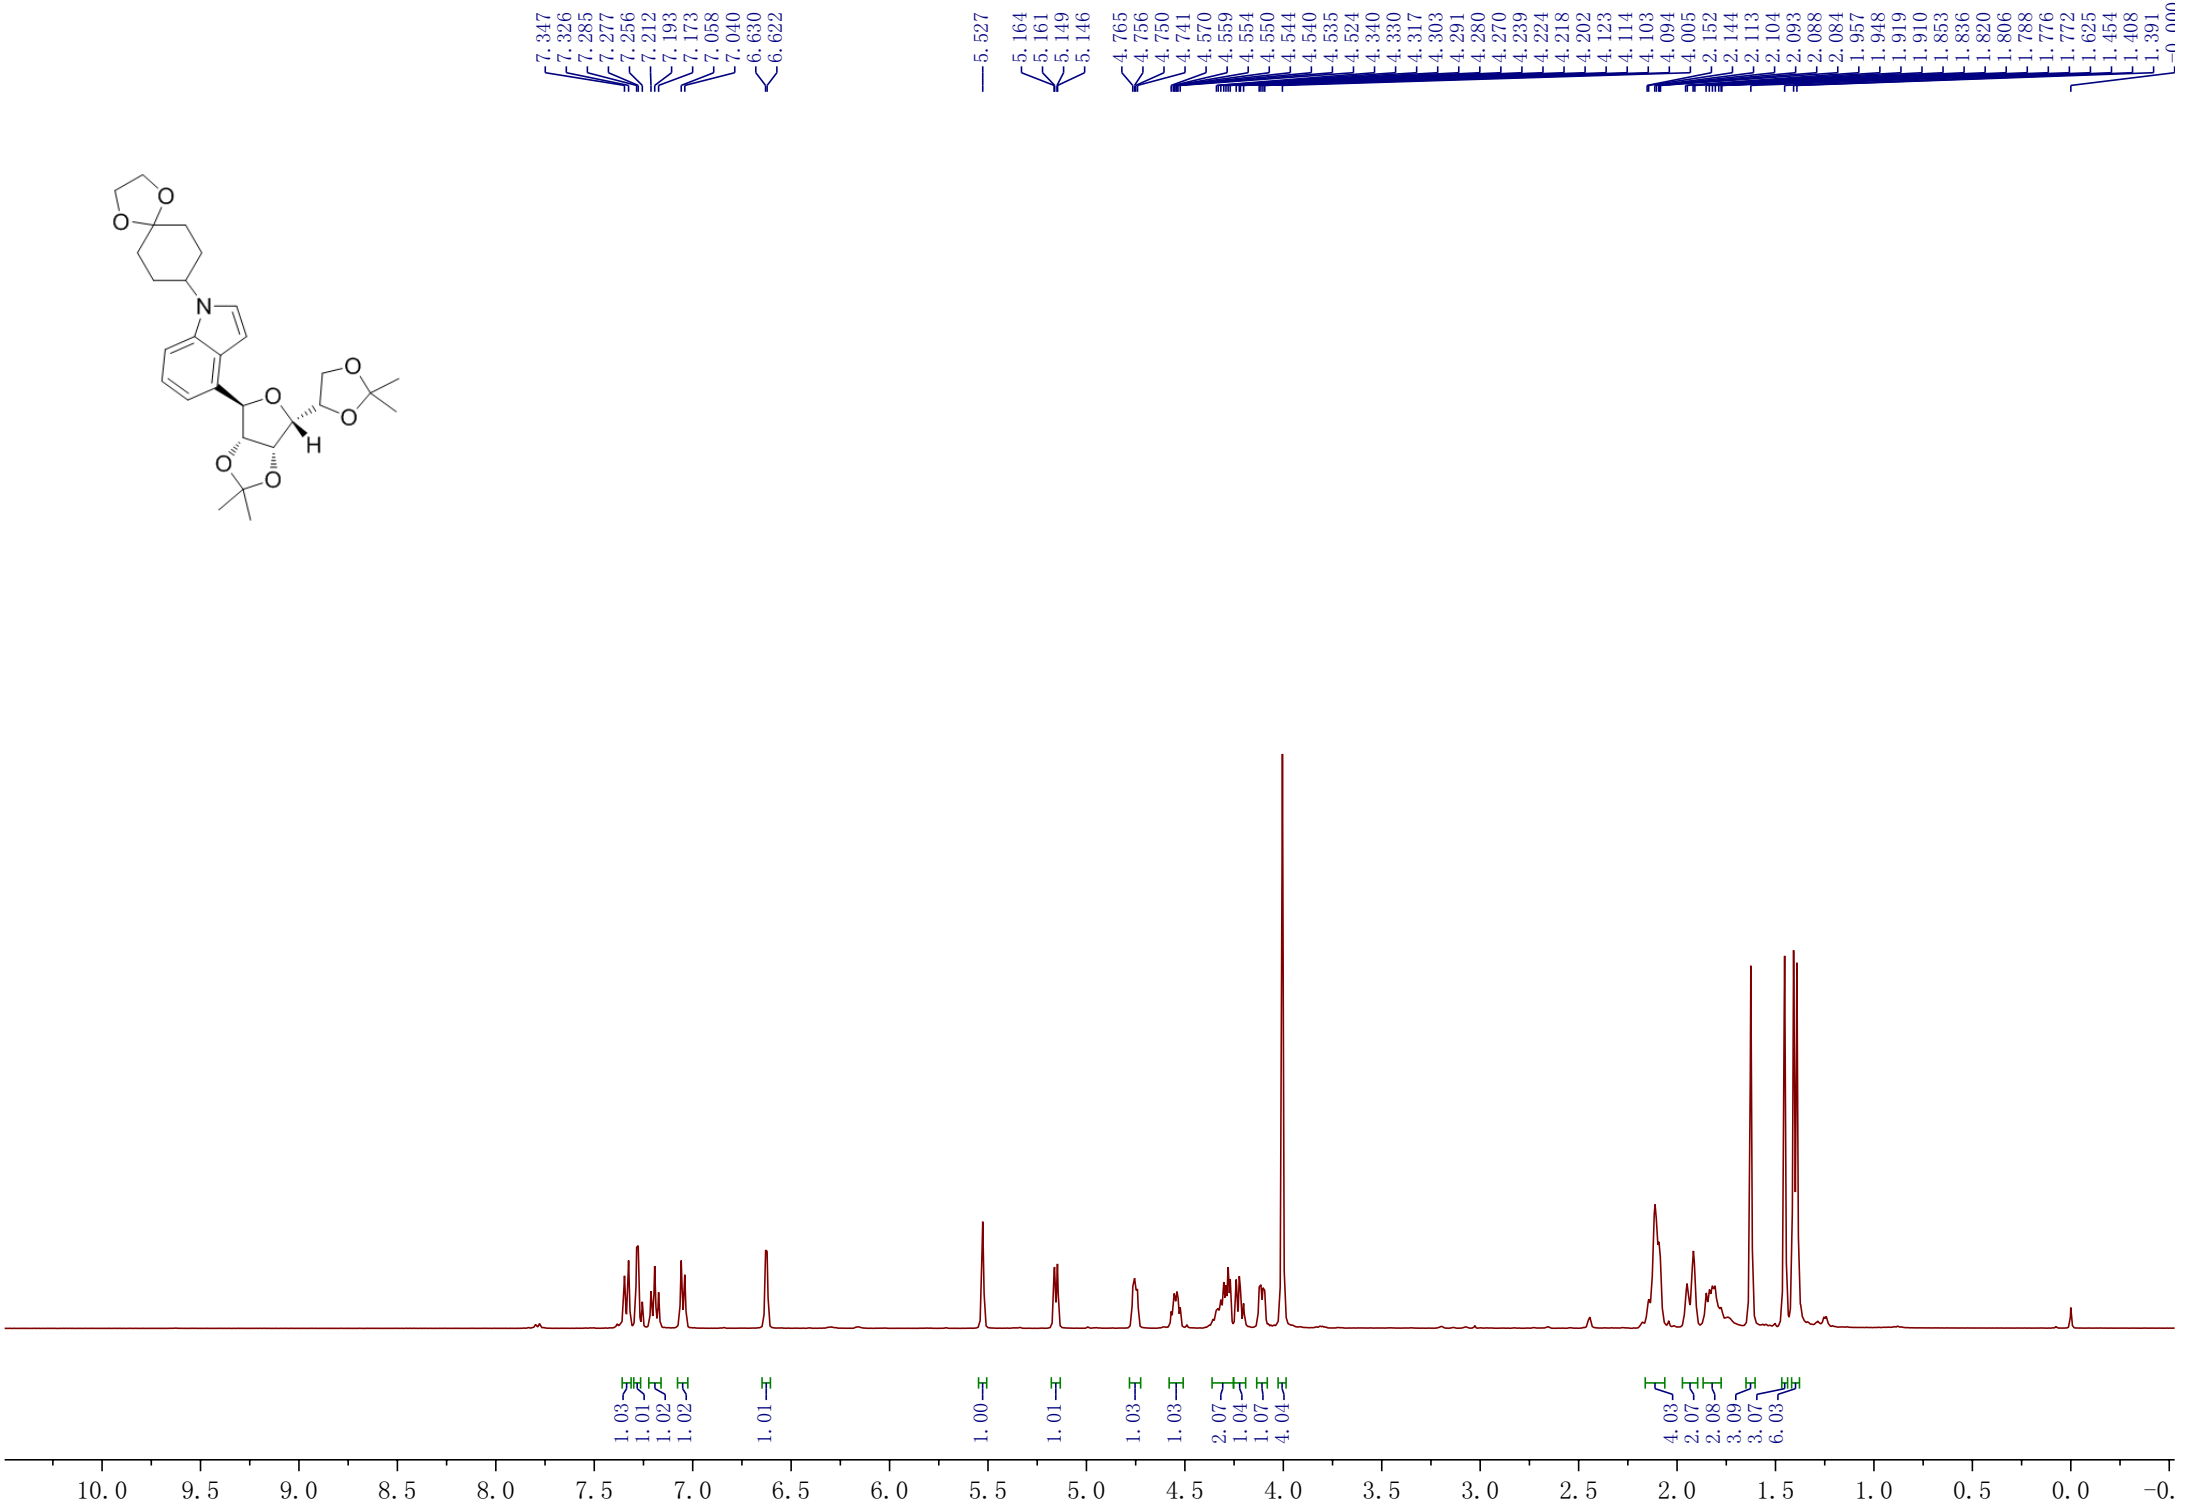

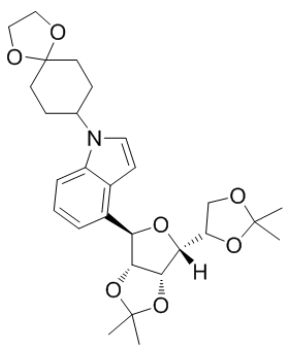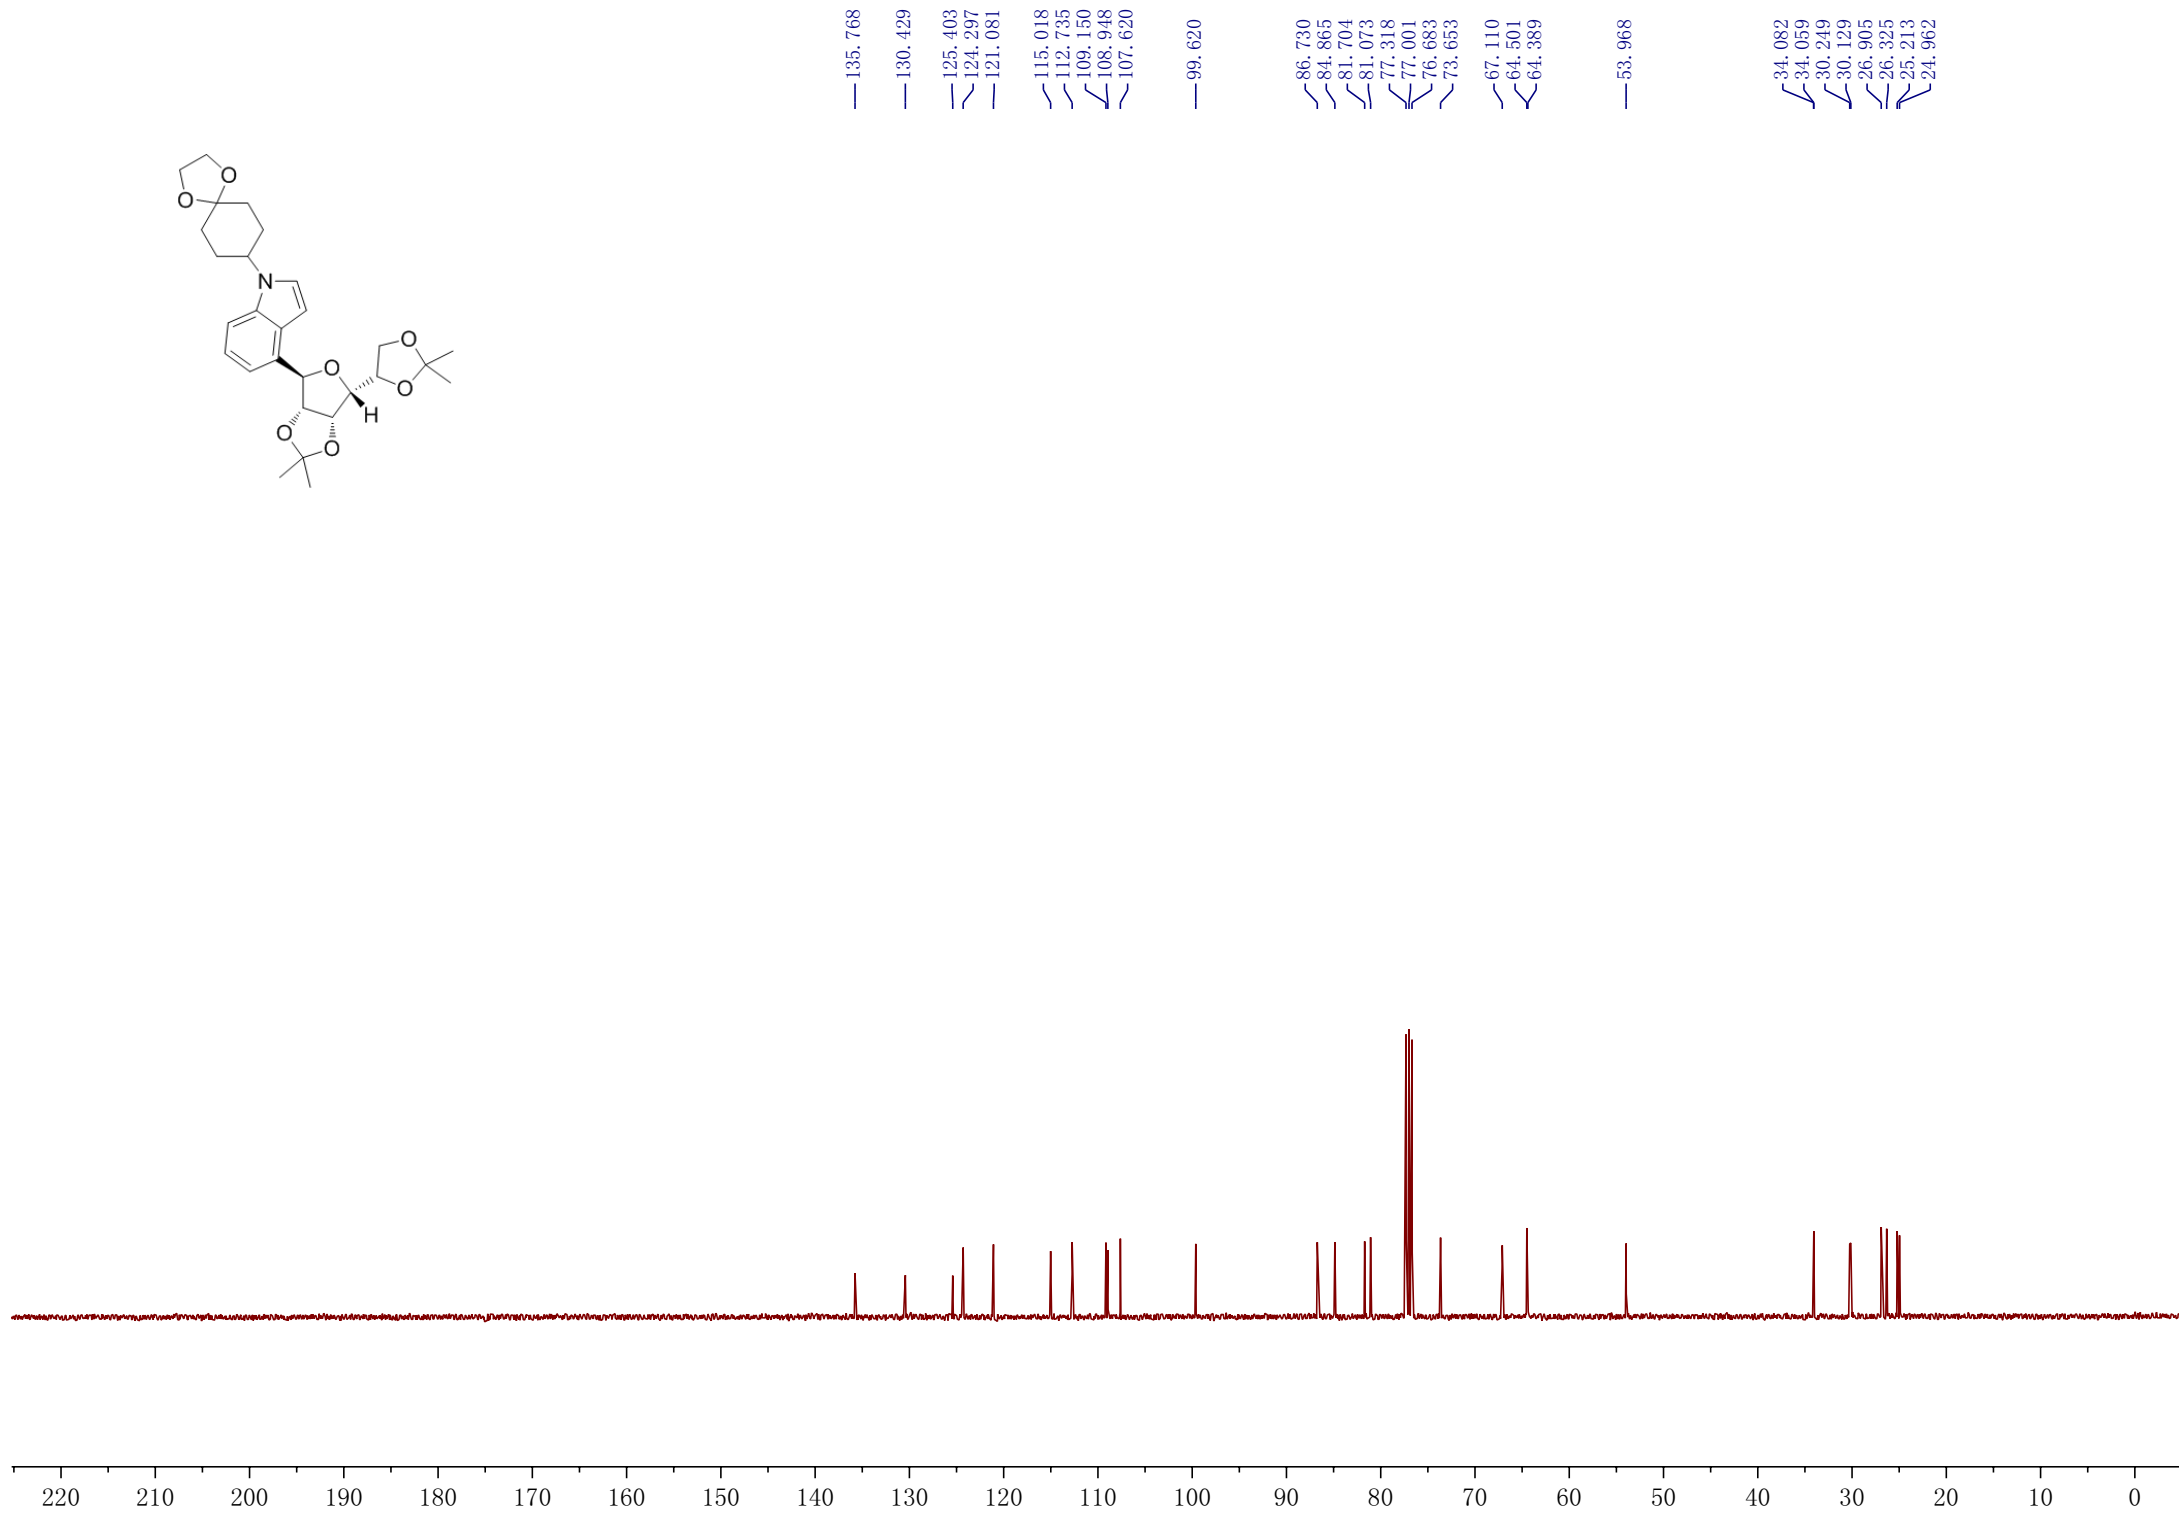

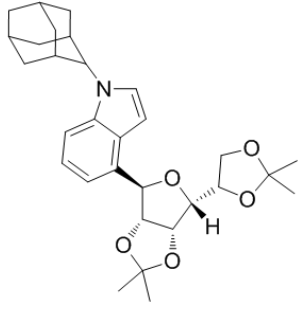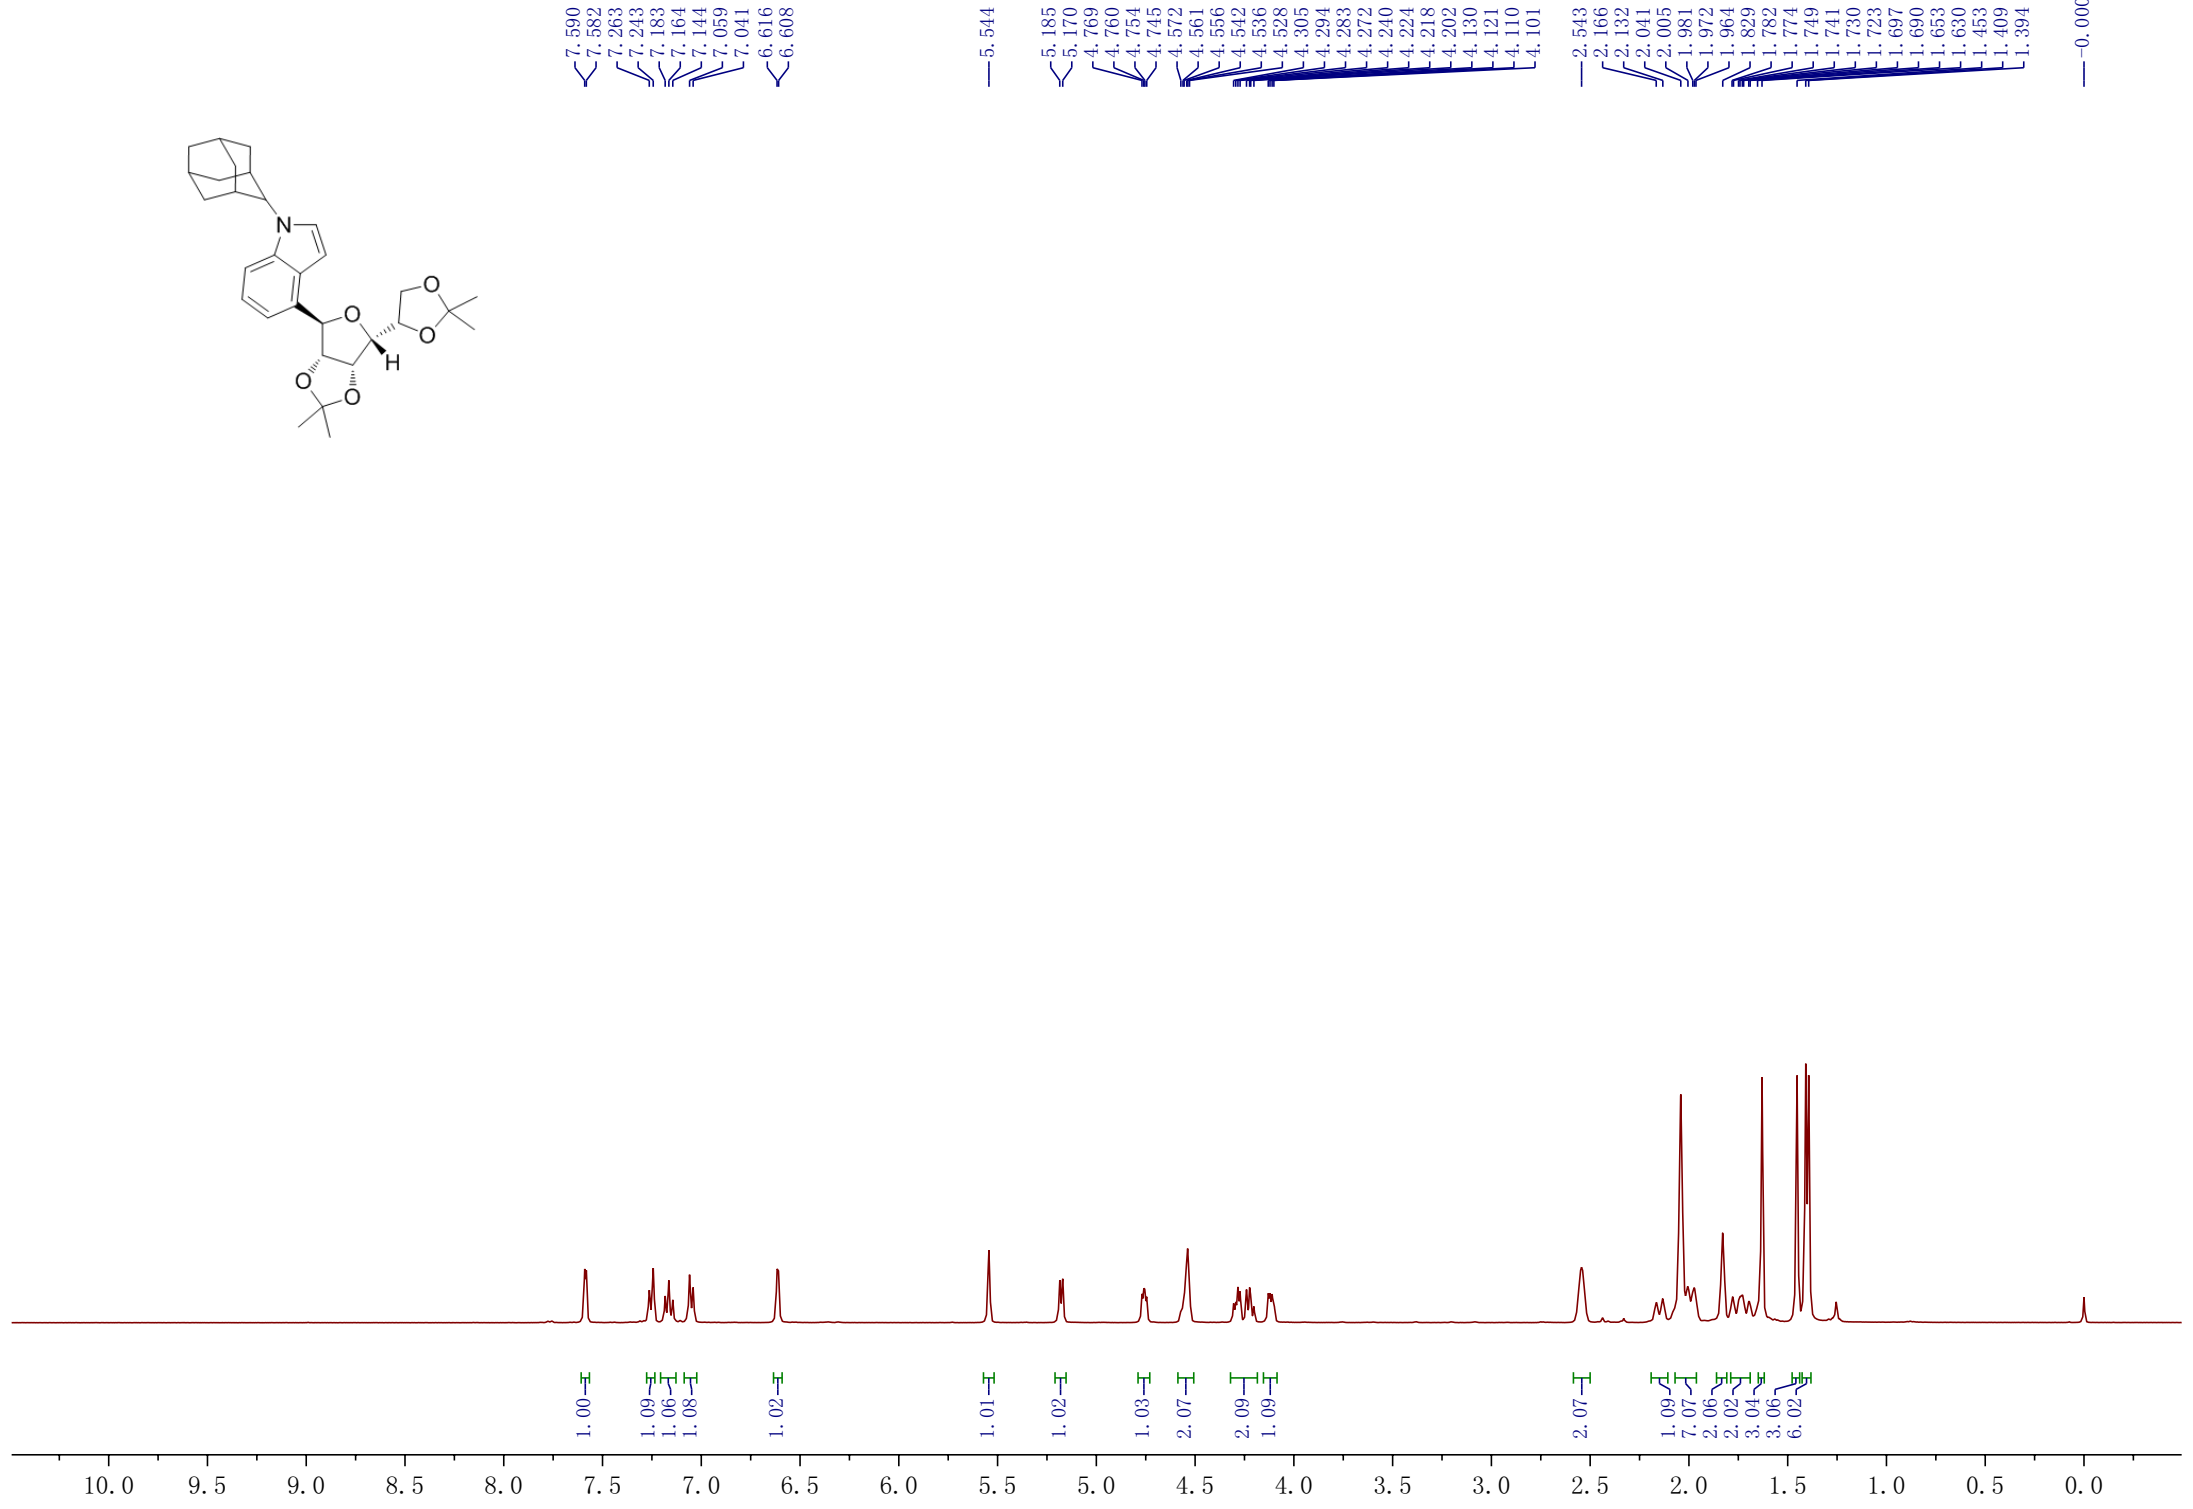

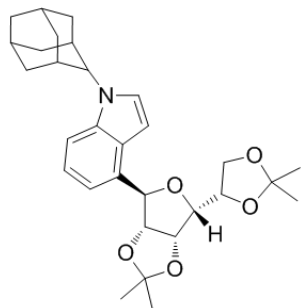

— 136.513  
— 130.250  
— 126.097  
— 125.588  
— 120.837  
— 115.021  
— 112.716  
— 110.195  
— 109.158  
— 98.787  
— 86.803  
— 84.886  
— 81.718  
— 81.092  
— 77.318  
— 77.001  
— 76.683  
— 73.693  
— 67.138  
— 61.011

— 38.499  
— 38.273  
— 37.578  
— 32.503  
— 32.329  
— 32.156  
— 32.122  
— 27.723  
— 27.225  
— 26.923  
— 26.337  
— 25.243  
— 24.958

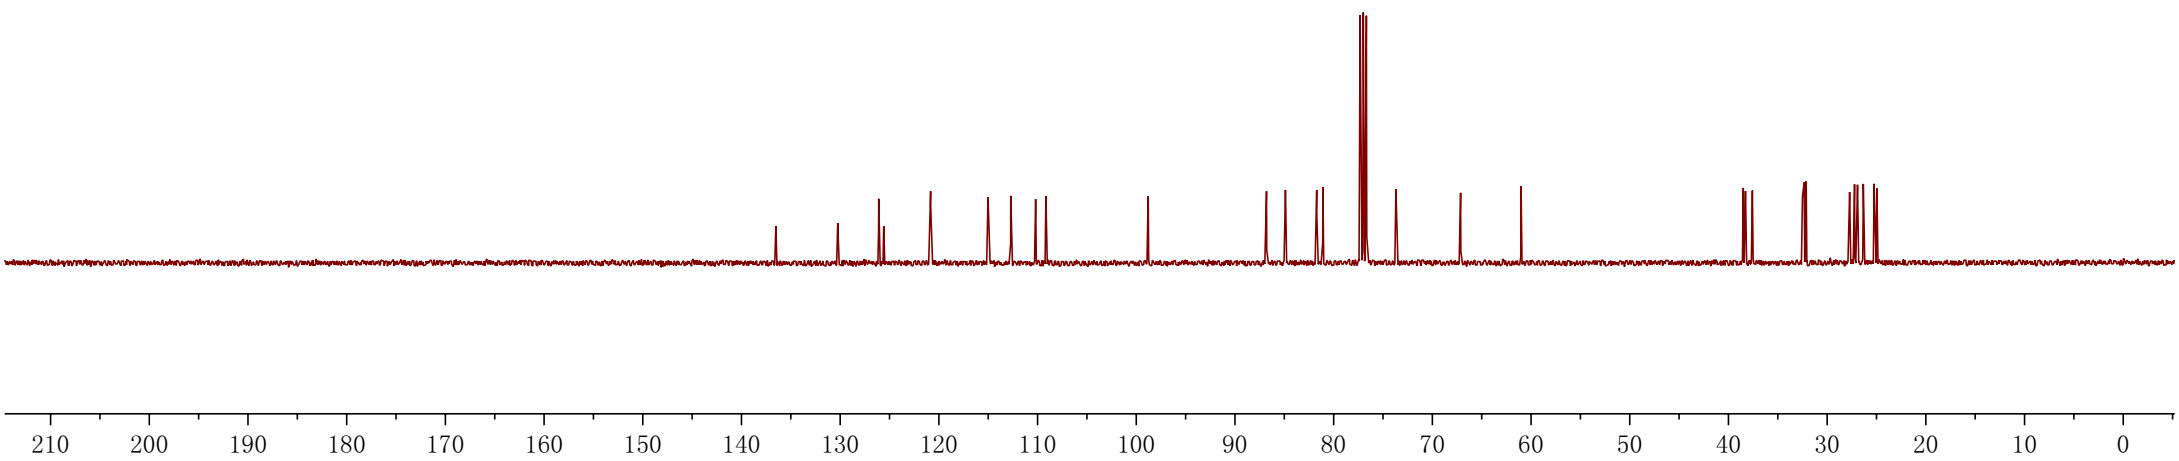

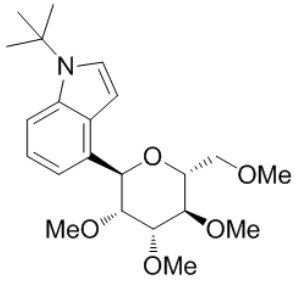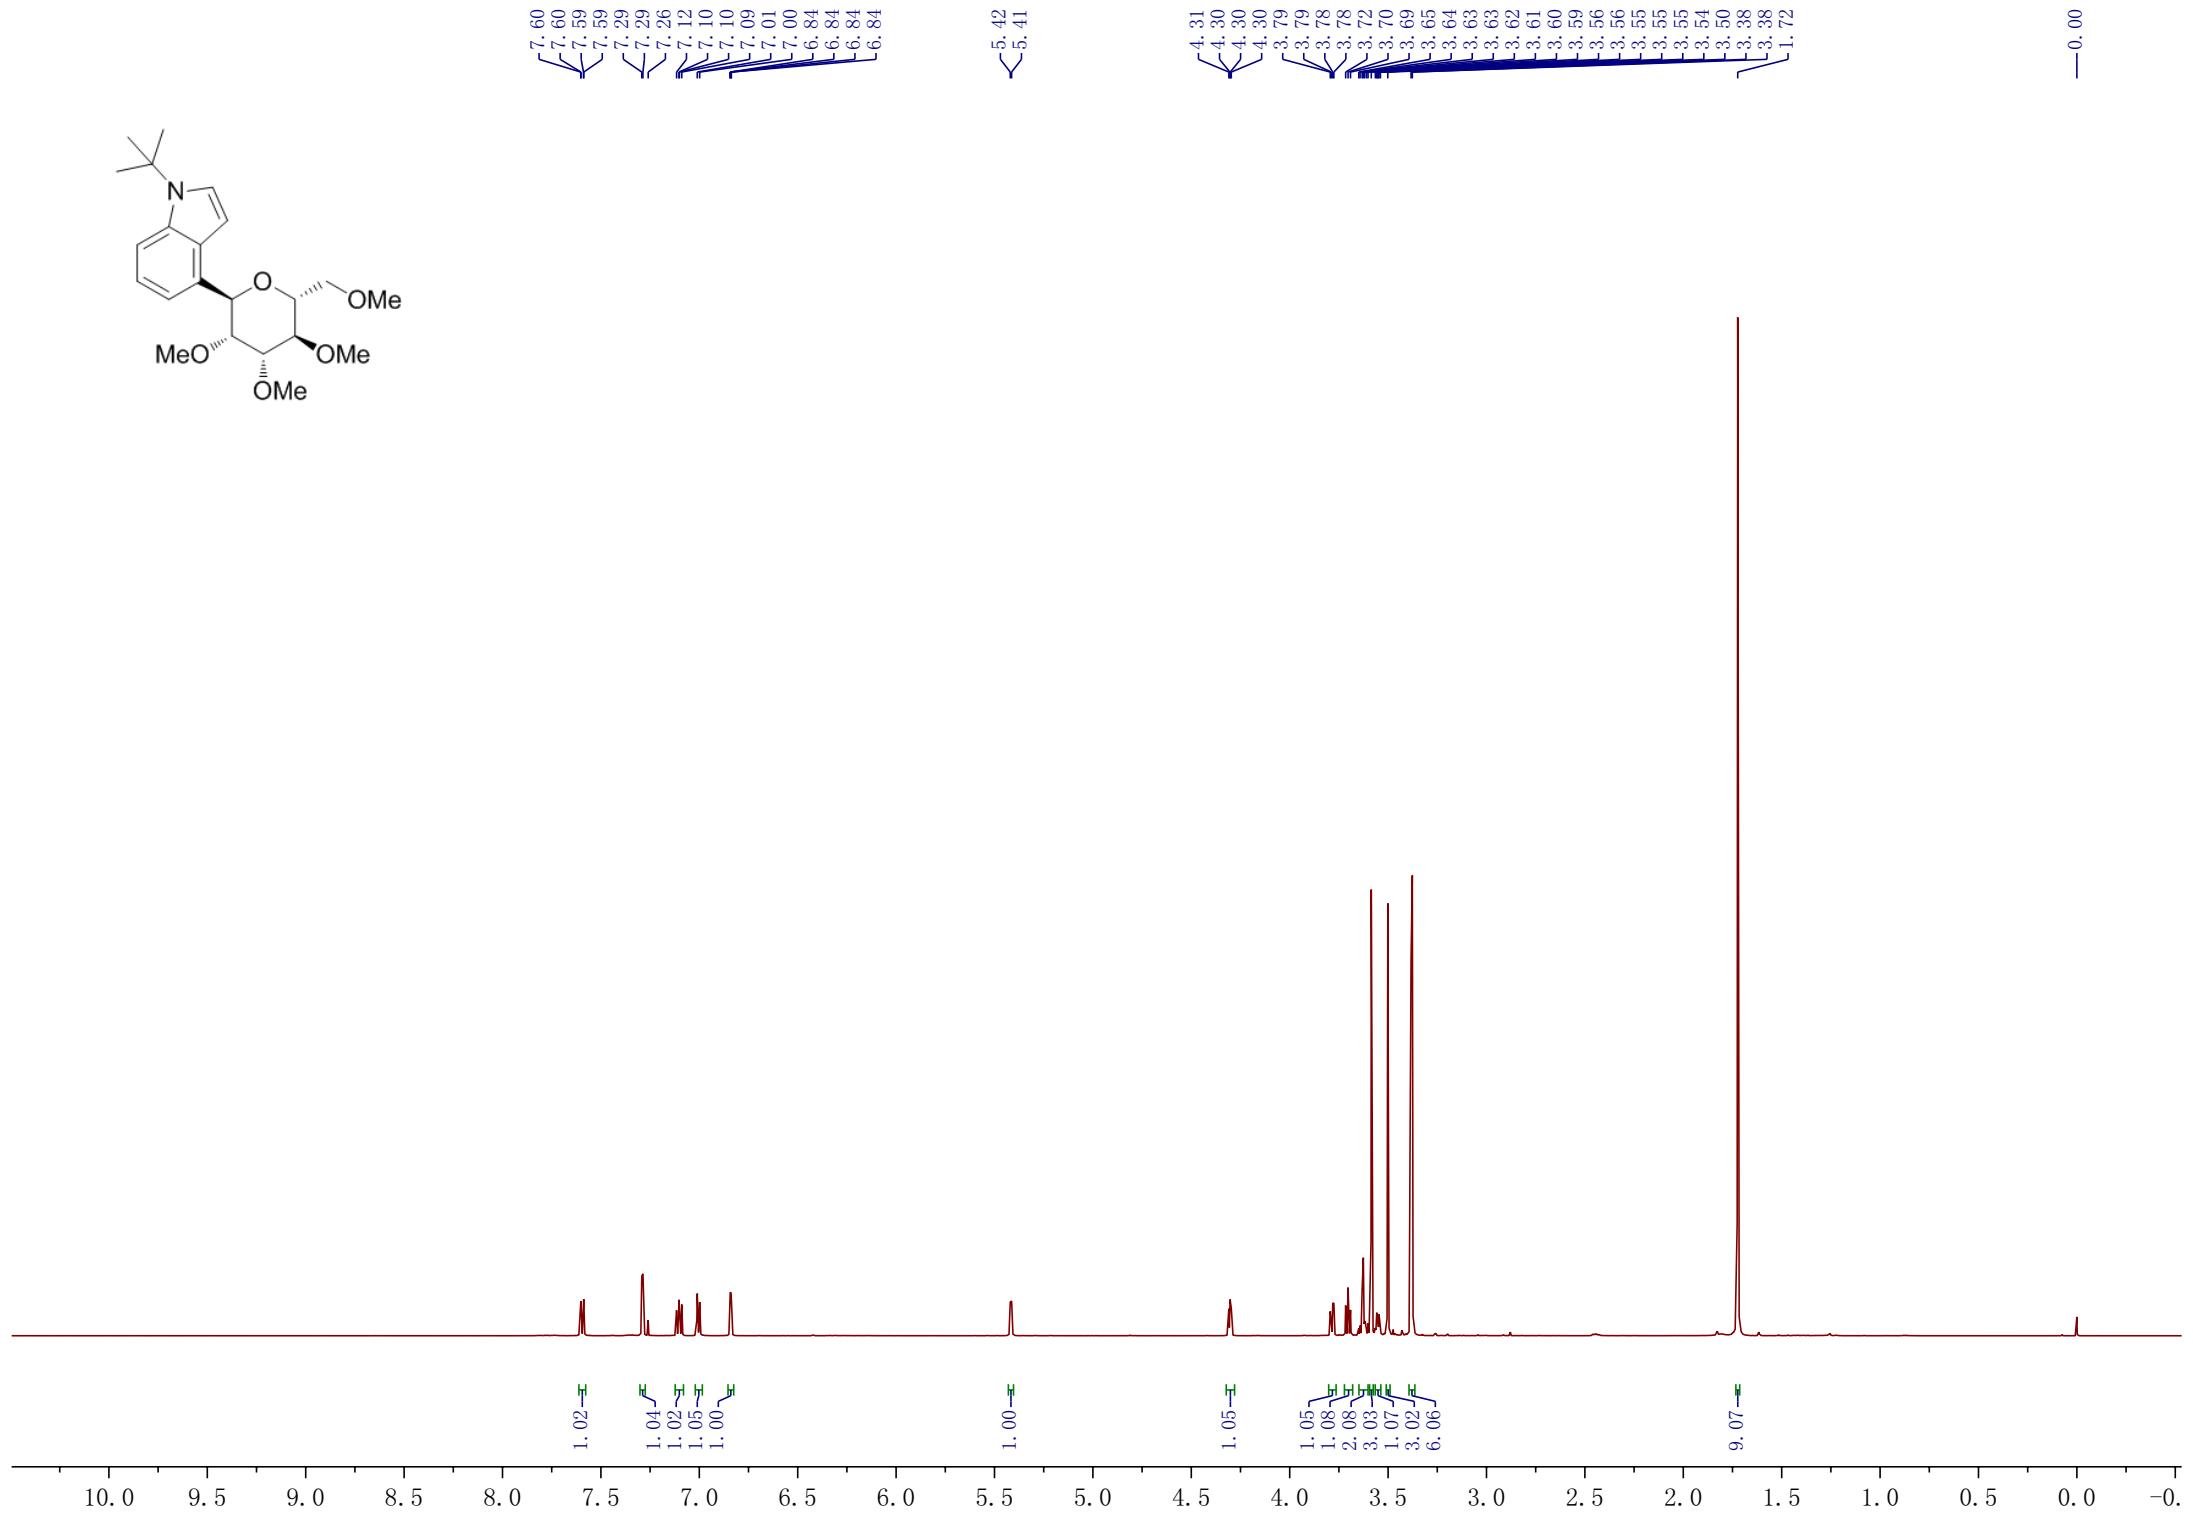

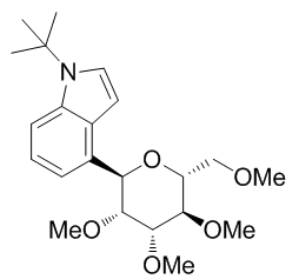

— 135.31  
130.13  
128.99  
125.04  
120.01  
117.17  
113.29

— 100.23

80.37  
77.21  
77.00  
76.79  
76.46  
73.37  
73.06  
71.32

59.45  
59.06  
58.15  
57.89  
55.67

— 29.77

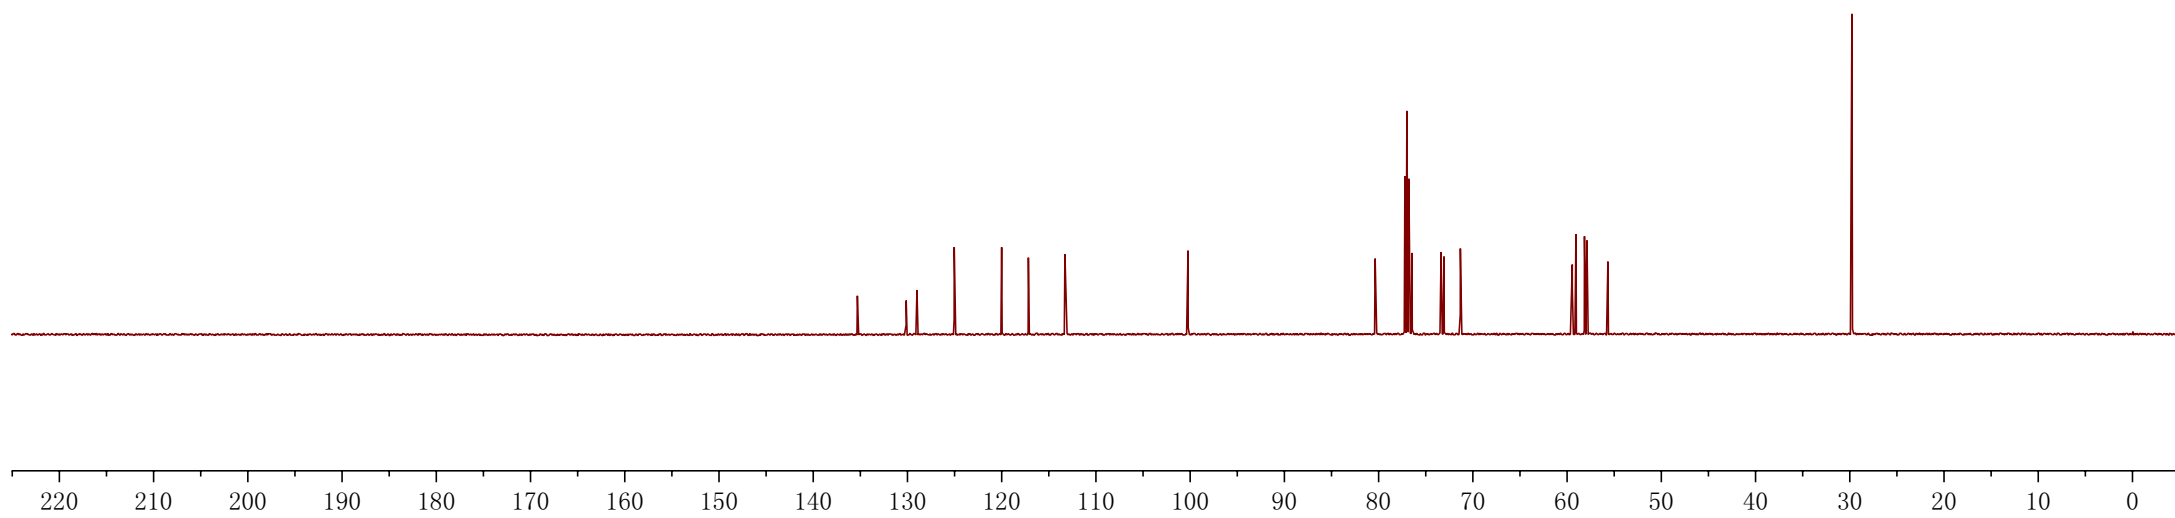

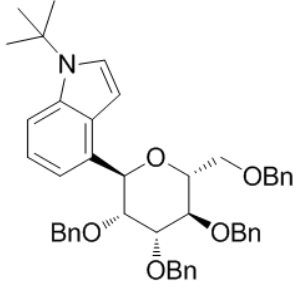

7.55  
7.53  
7.34  
7.33  
7.33  
7.32  
7.31  
7.30  
7.29  
7.27  
7.26  
7.24  
7.23  
7.19  
7.19  
7.17  
7.17  
6.99  
6.97  
6.95  
6.81  
6.80  
6.68  
6.66

5.45  
5.44

4.77  
4.74  
4.67  
4.65  
4.62  
4.58  
4.58  
4.55  
4.52  
4.50  
4.49  
4.47  
4.45  
4.44  
4.44  
4.43  
4.42  
4.41  
4.09  
4.00  
4.00  
3.98  
3.98  
3.86  
3.85  
3.83  
3.82  
3.81  
3.80  
3.78  
3.77  
3.72  
3.71  
3.70  
3.69  
1.70

—0.00

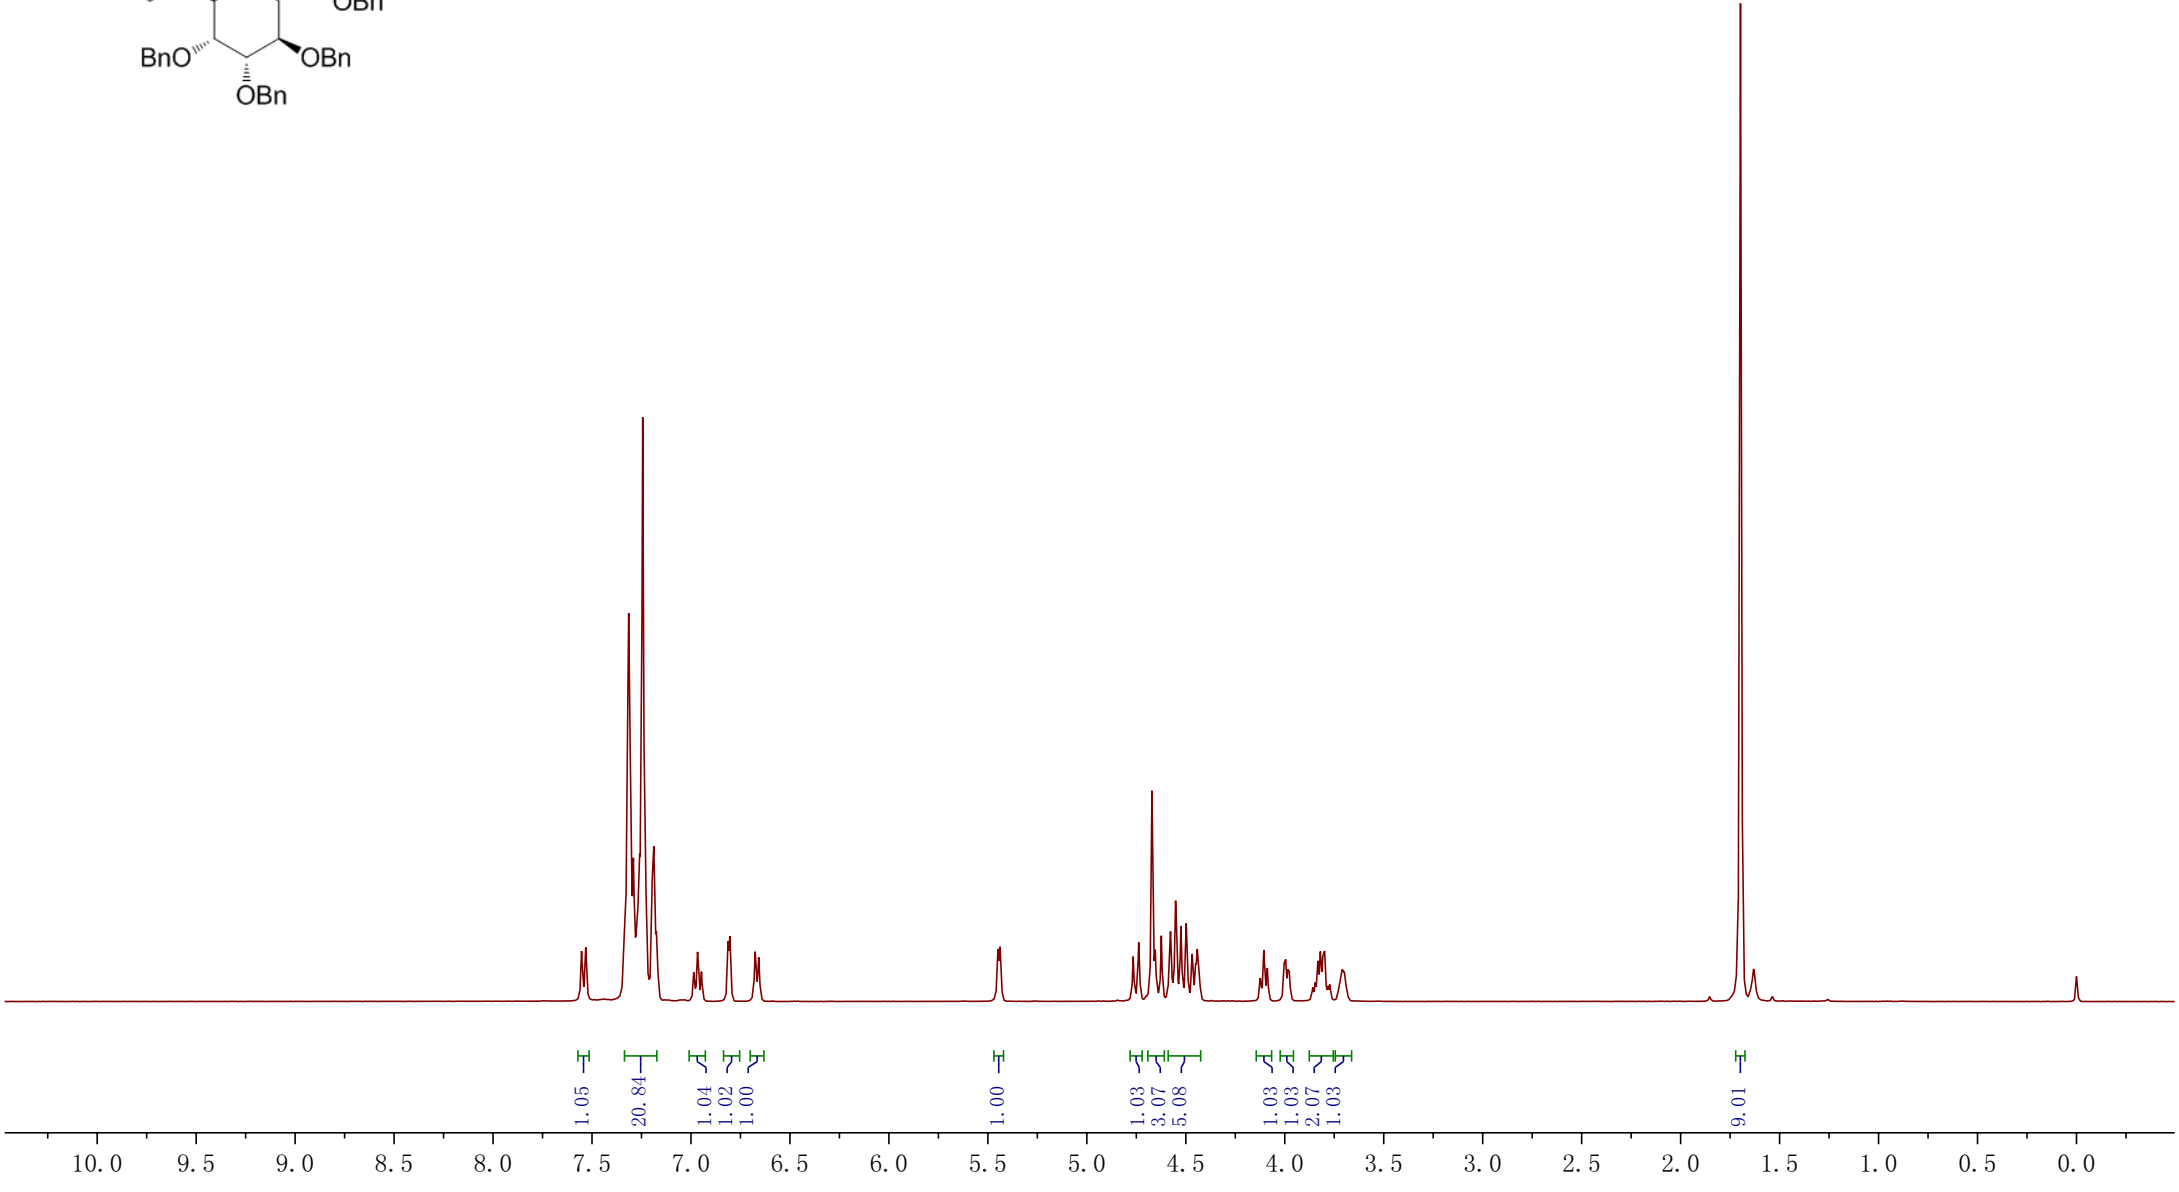

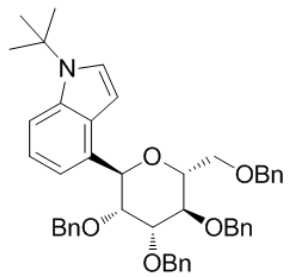

138.58  
138.52  
135.29  
130.27  
128.88  
128.31  
128.23  
128.17  
128.13  
127.98  
127.72  
127.69  
127.57  
127.42  
127.35  
127.31  
124.95  
120.03  
117.34  
113.17

100.51

78.20  
77.32  
77.00  
76.68  
75.50  
74.97  
74.24  
73.89  
73.70  
73.19  
72.47  
71.85  
69.20  
55.63

29.80

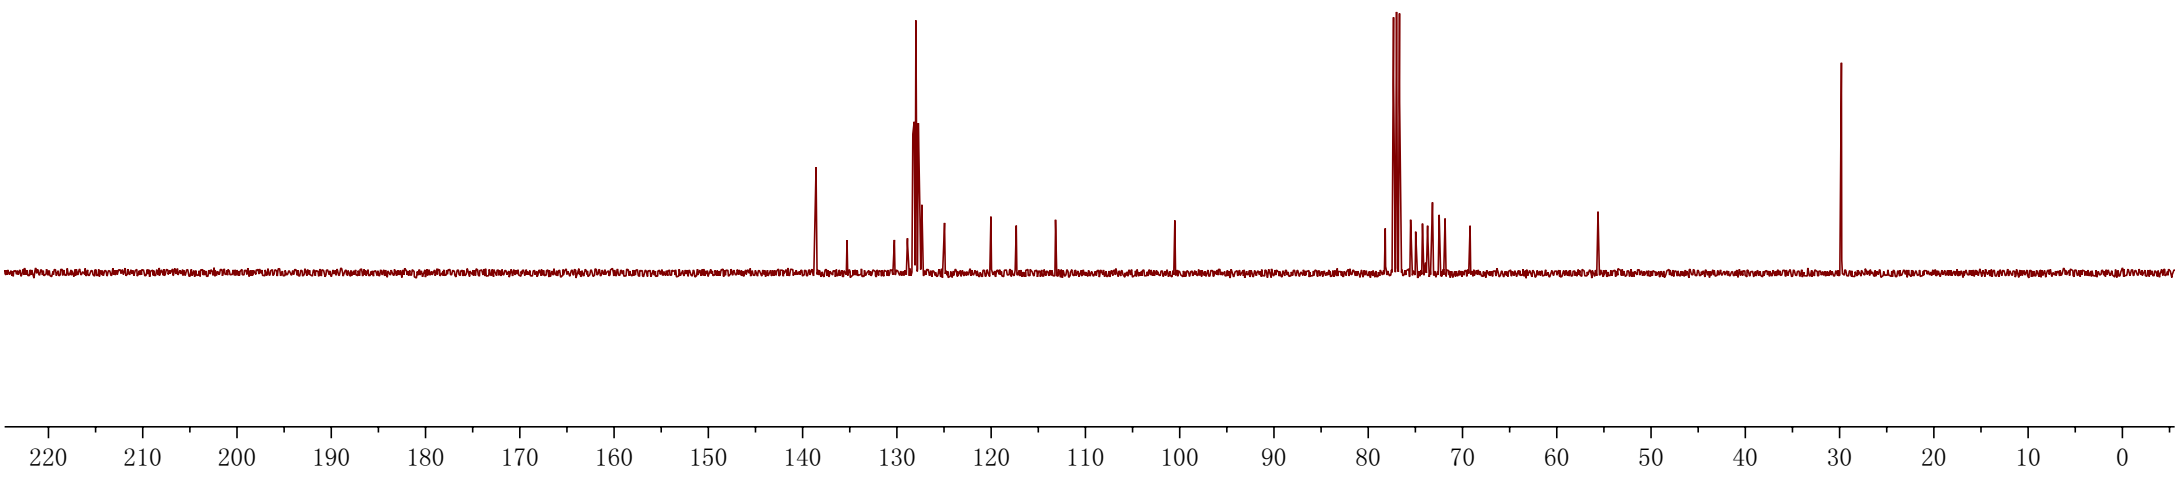



7.589  
7.568  
7.274  
7.265  
7.092  
7.072  
7.052  
6.982  
6.964  
6.873  
6.865  
6.638  
6.025  
6.011  
5.996  
5.982  
5.969  
5.962  
5.955  
5.948  
5.935  
5.921  
5.908  
5.905  
5.892  
5.879  
5.865  
5.851  
5.836  
5.823  
5.391  
5.385  
5.381  
5.343  
5.338  
5.334  
5.283  
5.280  
5.275  
5.271  
5.258  
5.253  
5.236  
5.232  
5.215  
5.210  
5.203  
5.198  
5.194  
5.160  
5.155  
5.152  
5.148  
5.125  
5.121  
5.117  
5.117  
5.094  
5.089  
4.466  
4.460  
4.456  
4.450  
4.450  
4.292  
4.278  
4.261  
4.246  
4.234  
4.229  
4.220  
4.216  
4.201  
4.201  
4.149  
4.144  
4.135  
4.131  
4.116  
4.113  
4.103  
4.099  
4.086  
4.082  
4.072  
4.068  
4.064  
4.053  
4.039  
4.020  
4.005  
3.985  
3.971  
3.953  
3.949  
3.943  
3.938  
3.922  
3.906  
3.887  
3.711  
3.701  
3.593  
3.581  
3.567  
1.714

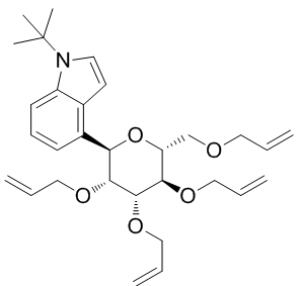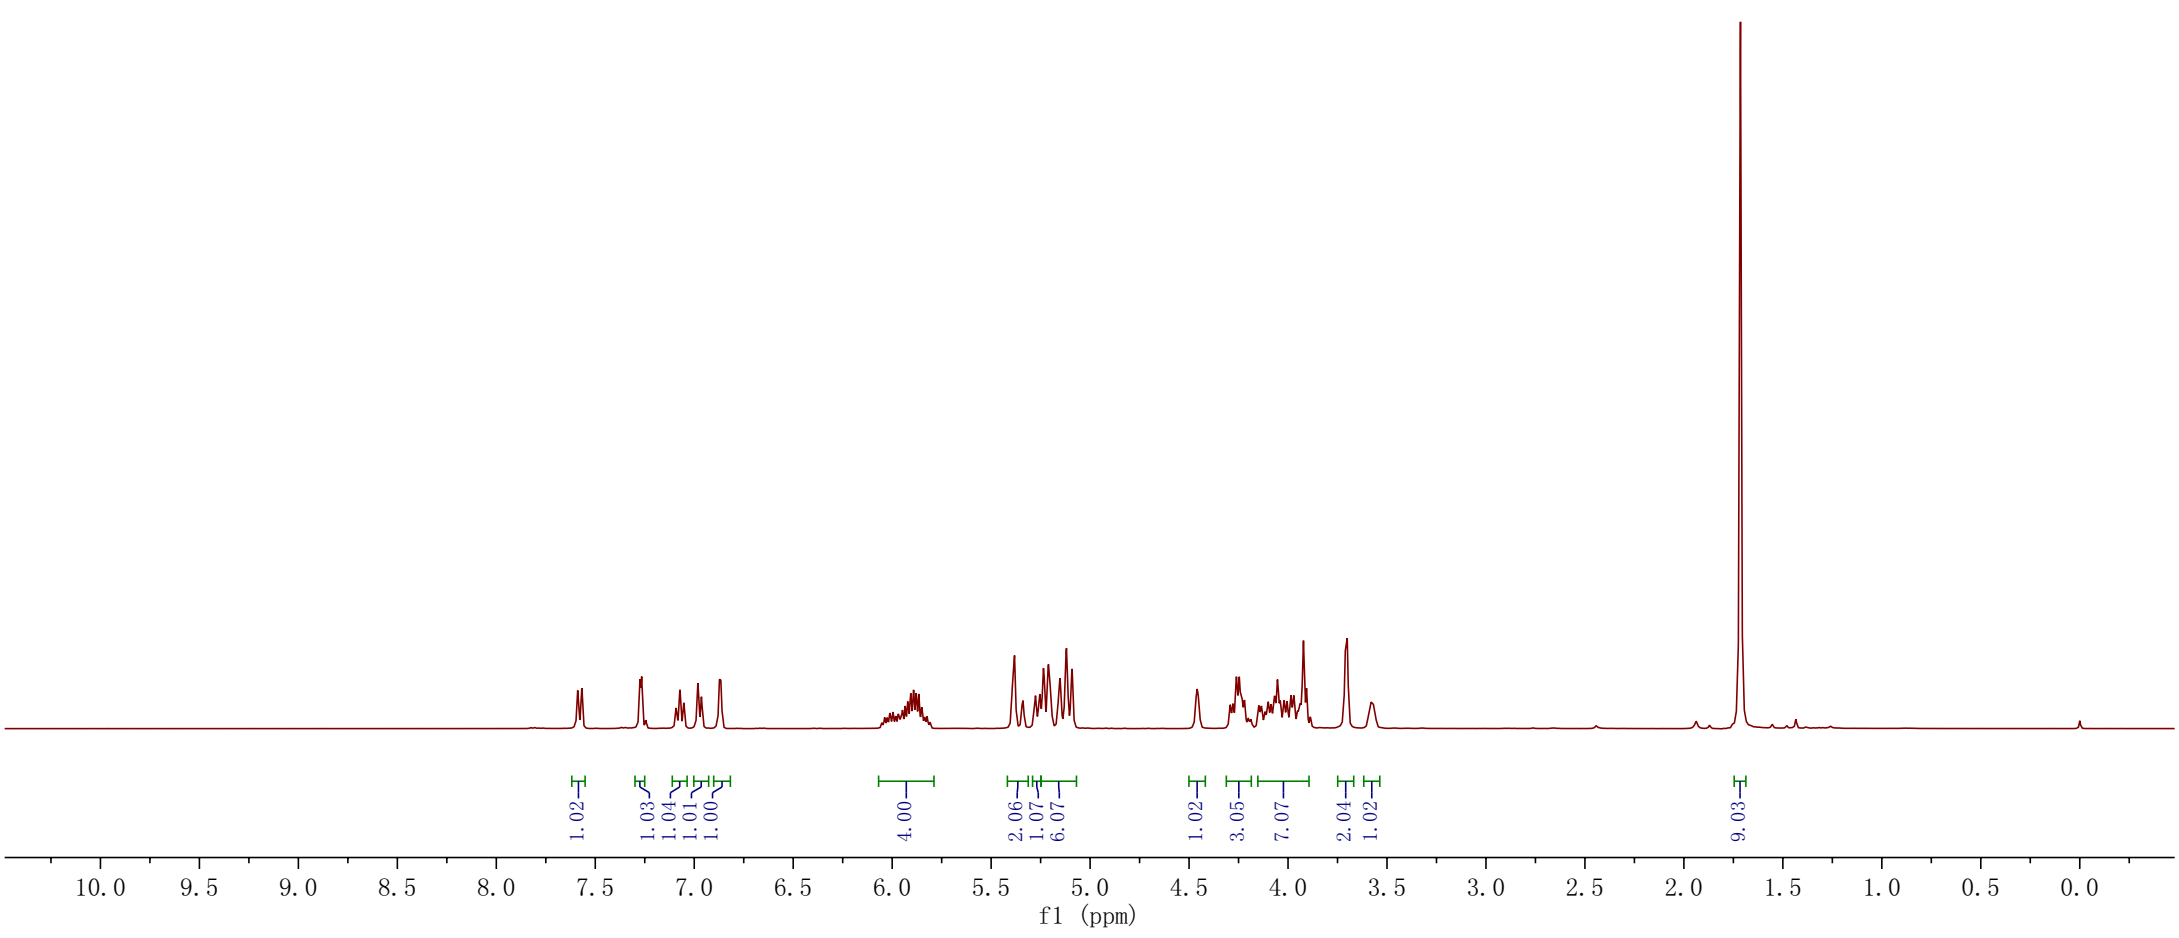

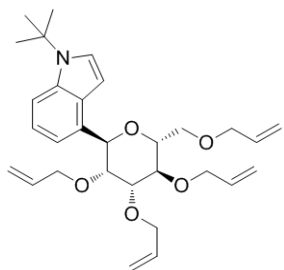

135.274  
135.257  
135.232  
135.118  
134.978  
130.204  
128.882  
124.918  
119.899  
117.251  
117.043  
116.816  
116.471  
116.169  
113.180  
100.479  
78.422  
77.319  
77.000  
76.682  
75.222  
74.627  
74.472  
73.556  
72.658  
72.175  
71.397  
71.276  
69.056  
55.590

29.744

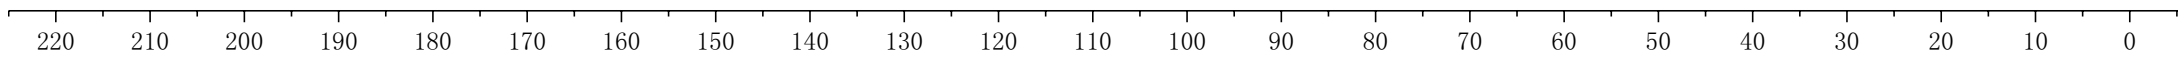

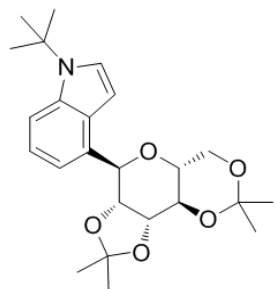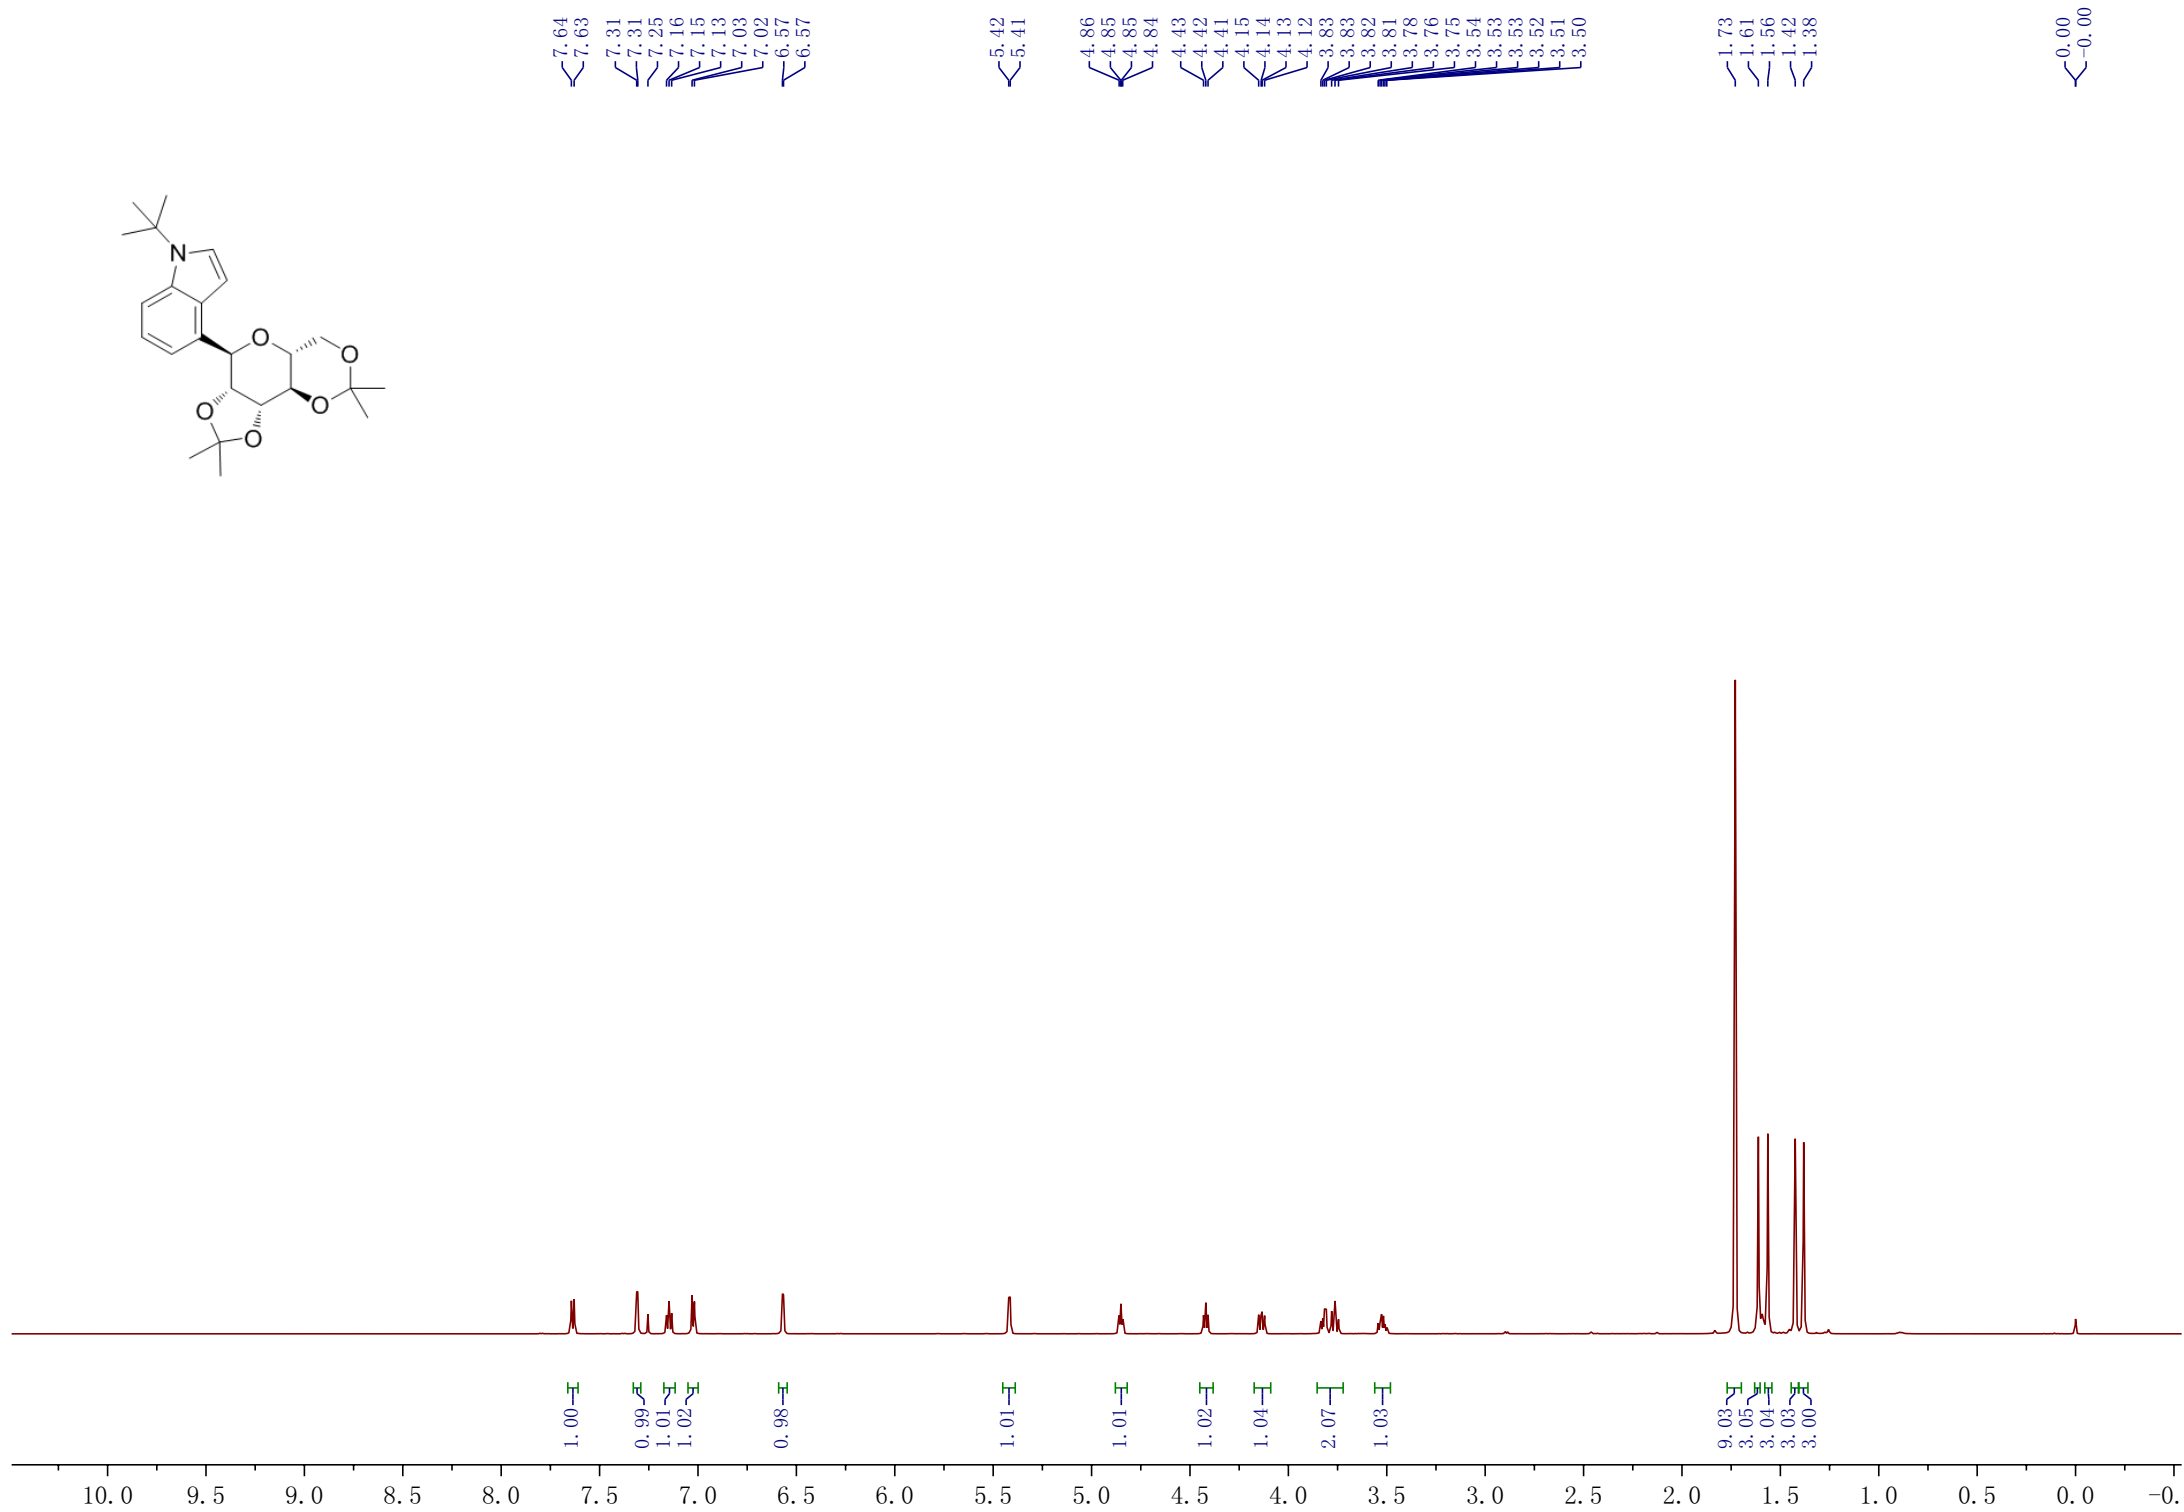

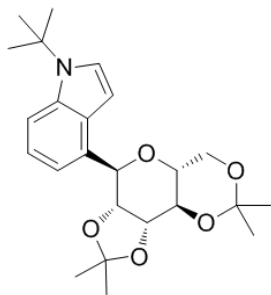

— 135.38

— 129.74

— 129.01

— 125.48

— 120.15

— 117.54

— 113.91

— 109.23

— 99.45

— 98.76

— 77.21

— 77.00

— 76.79

— 76.13

— 76.04

— 75.14

— 73.21

— 64.26

— 62.80

— 55.86

— 29.83

— 29.06

— 27.91

— 25.56

— 18.97

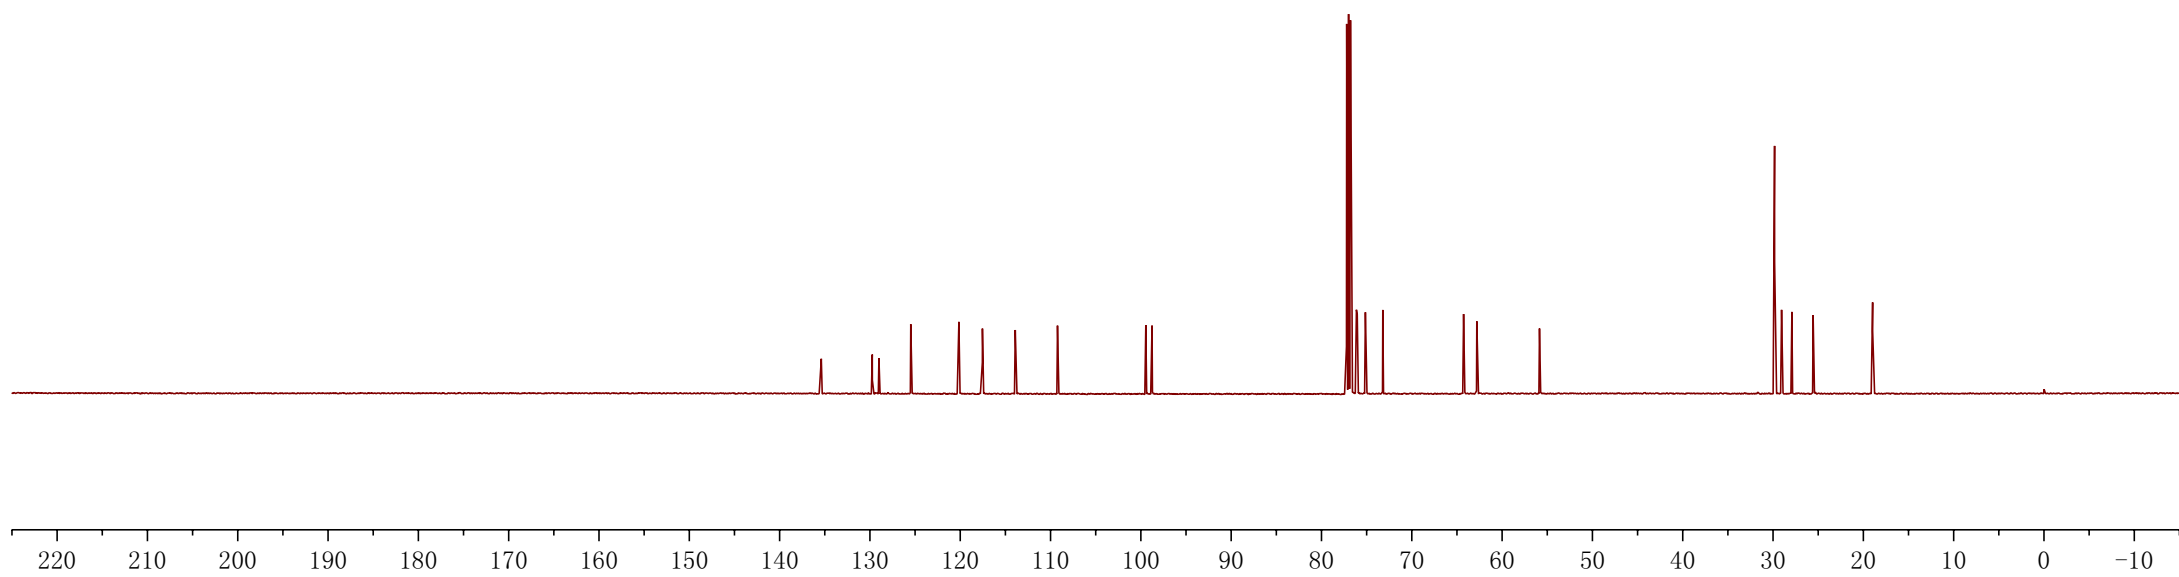

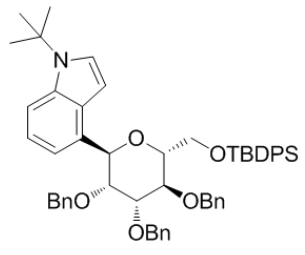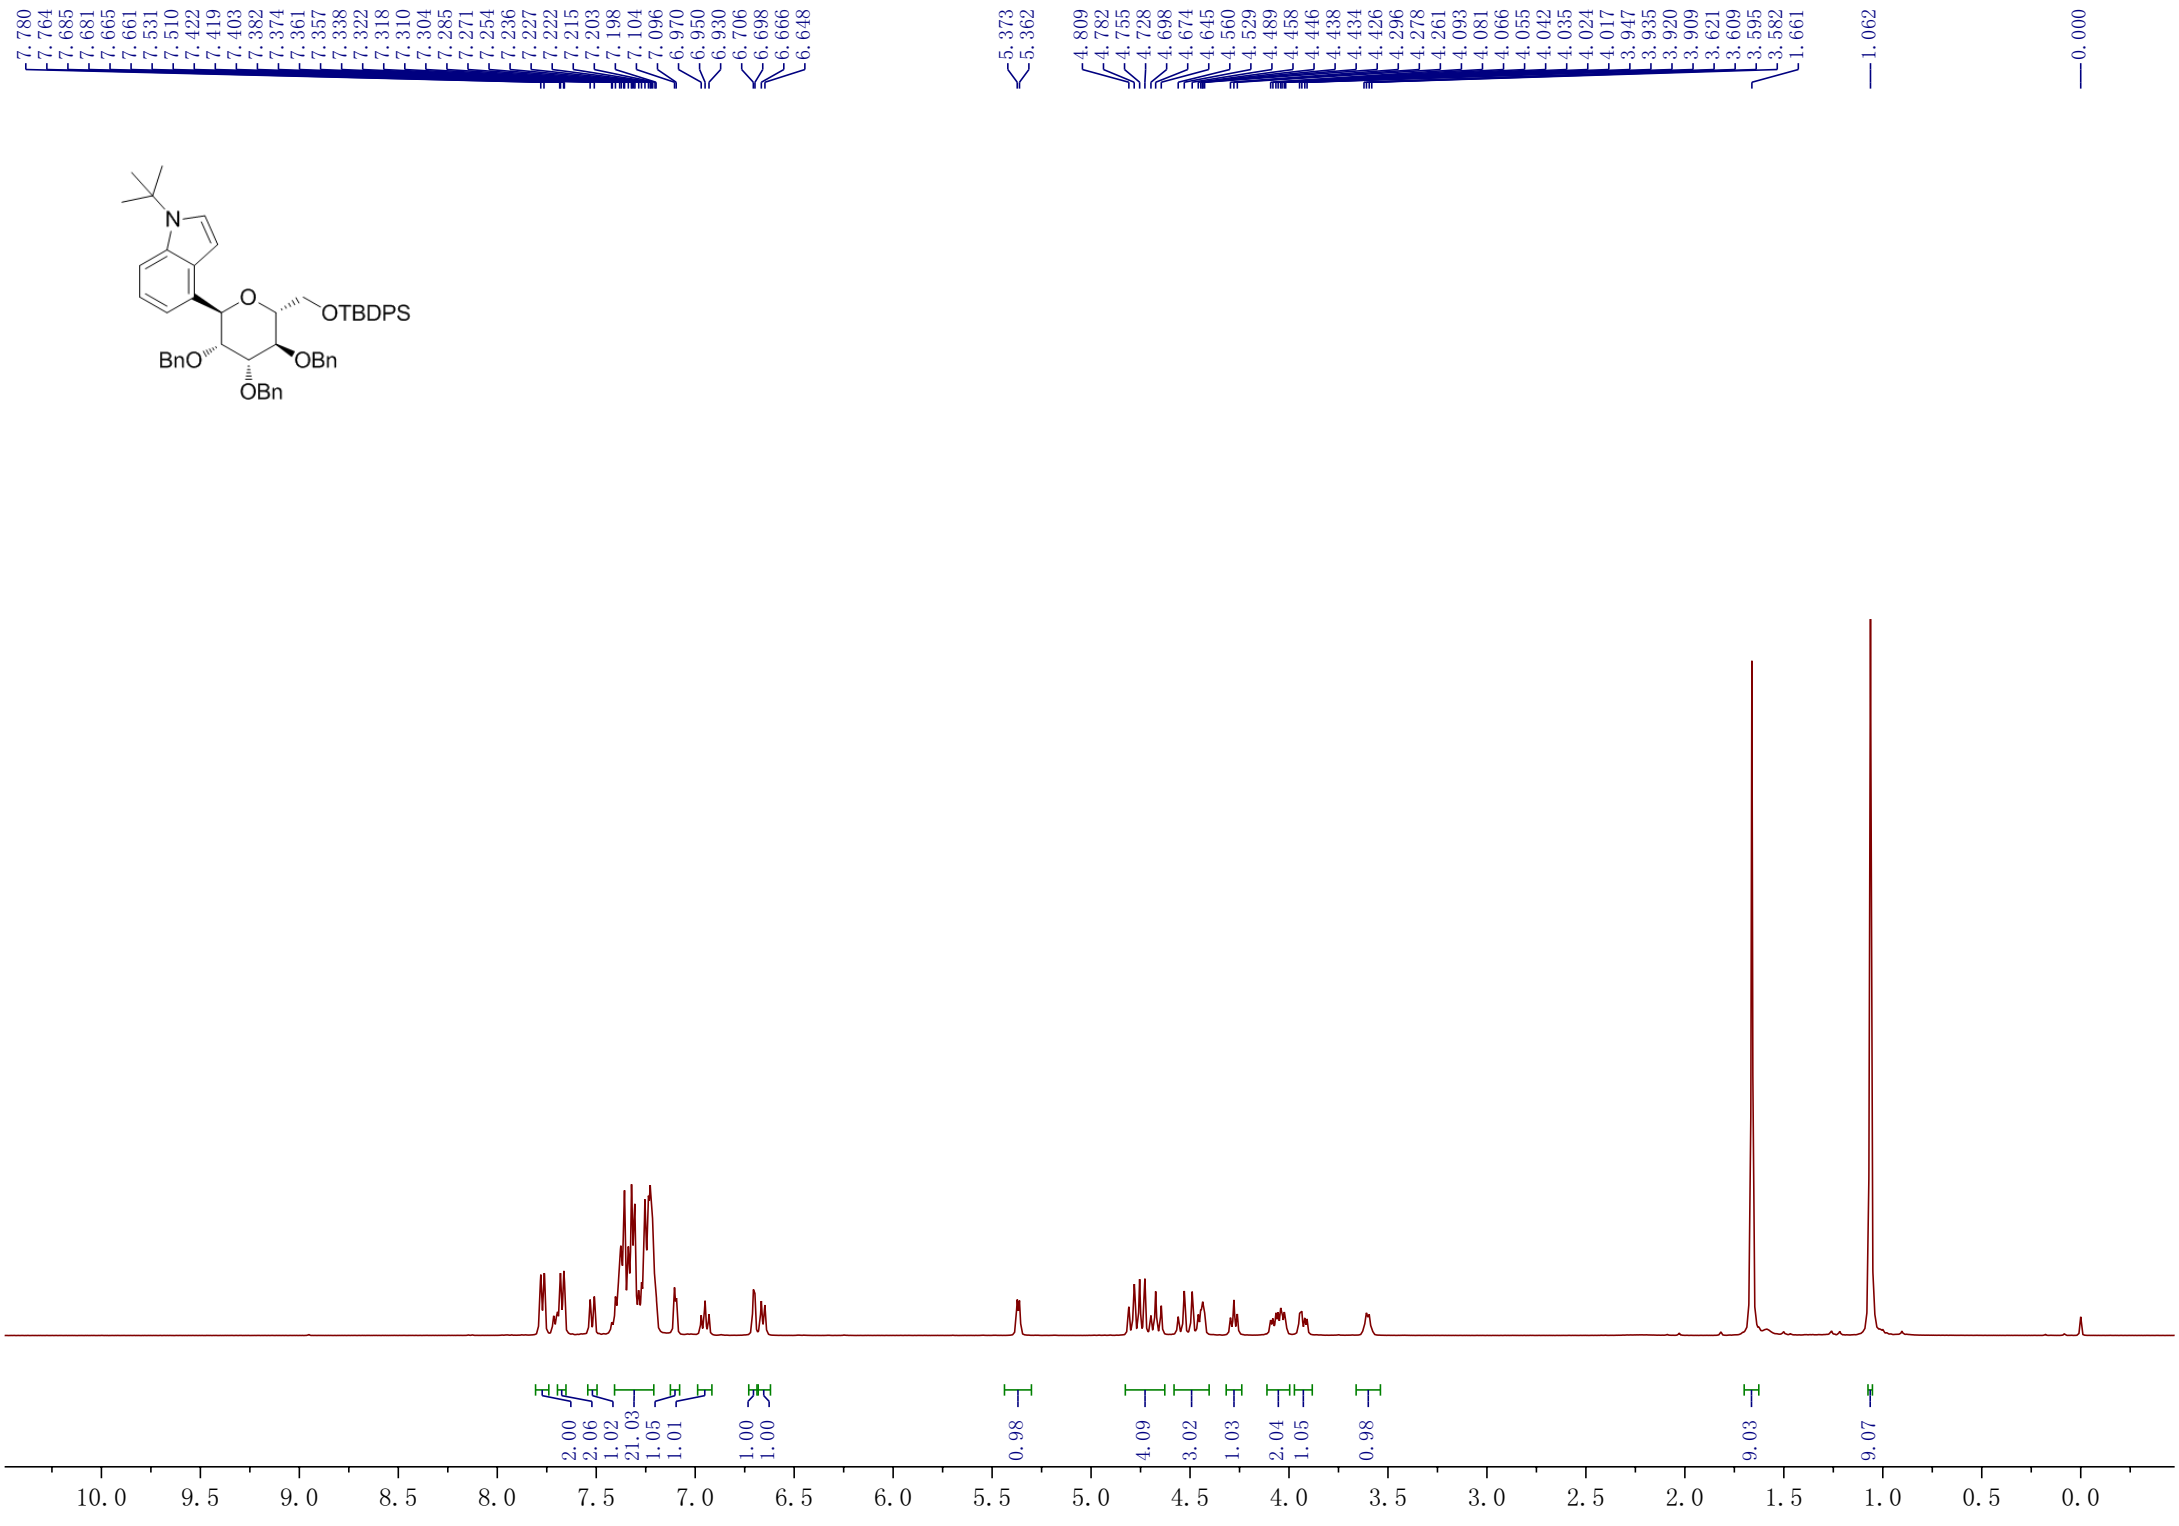

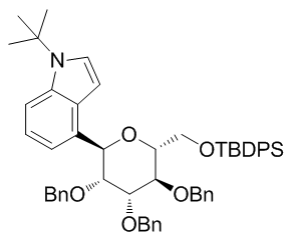

138.693  
138.639  
135.884  
135.574  
135.206  
134.751  
133.806  
133.531  
130.567  
129.601  
129.452  
129.428  
128.835  
128.328  
128.269  
128.081  
127.728  
127.672  
127.584  
127.502  
127.413  
127.215  
124.916  
119.926  
117.422  
113.088

100.488

77.863  
77.318  
77.001  
76.683  
75.564  
75.135  
74.957  
73.950  
73.701  
72.495  
71.881  
62.887

55.547

29.768  
26.834  
26.530

19.267

220 210 200 190 180 170 160 150 140 130 120 110 100 90 80 70 60 50 40 30 20 10 0

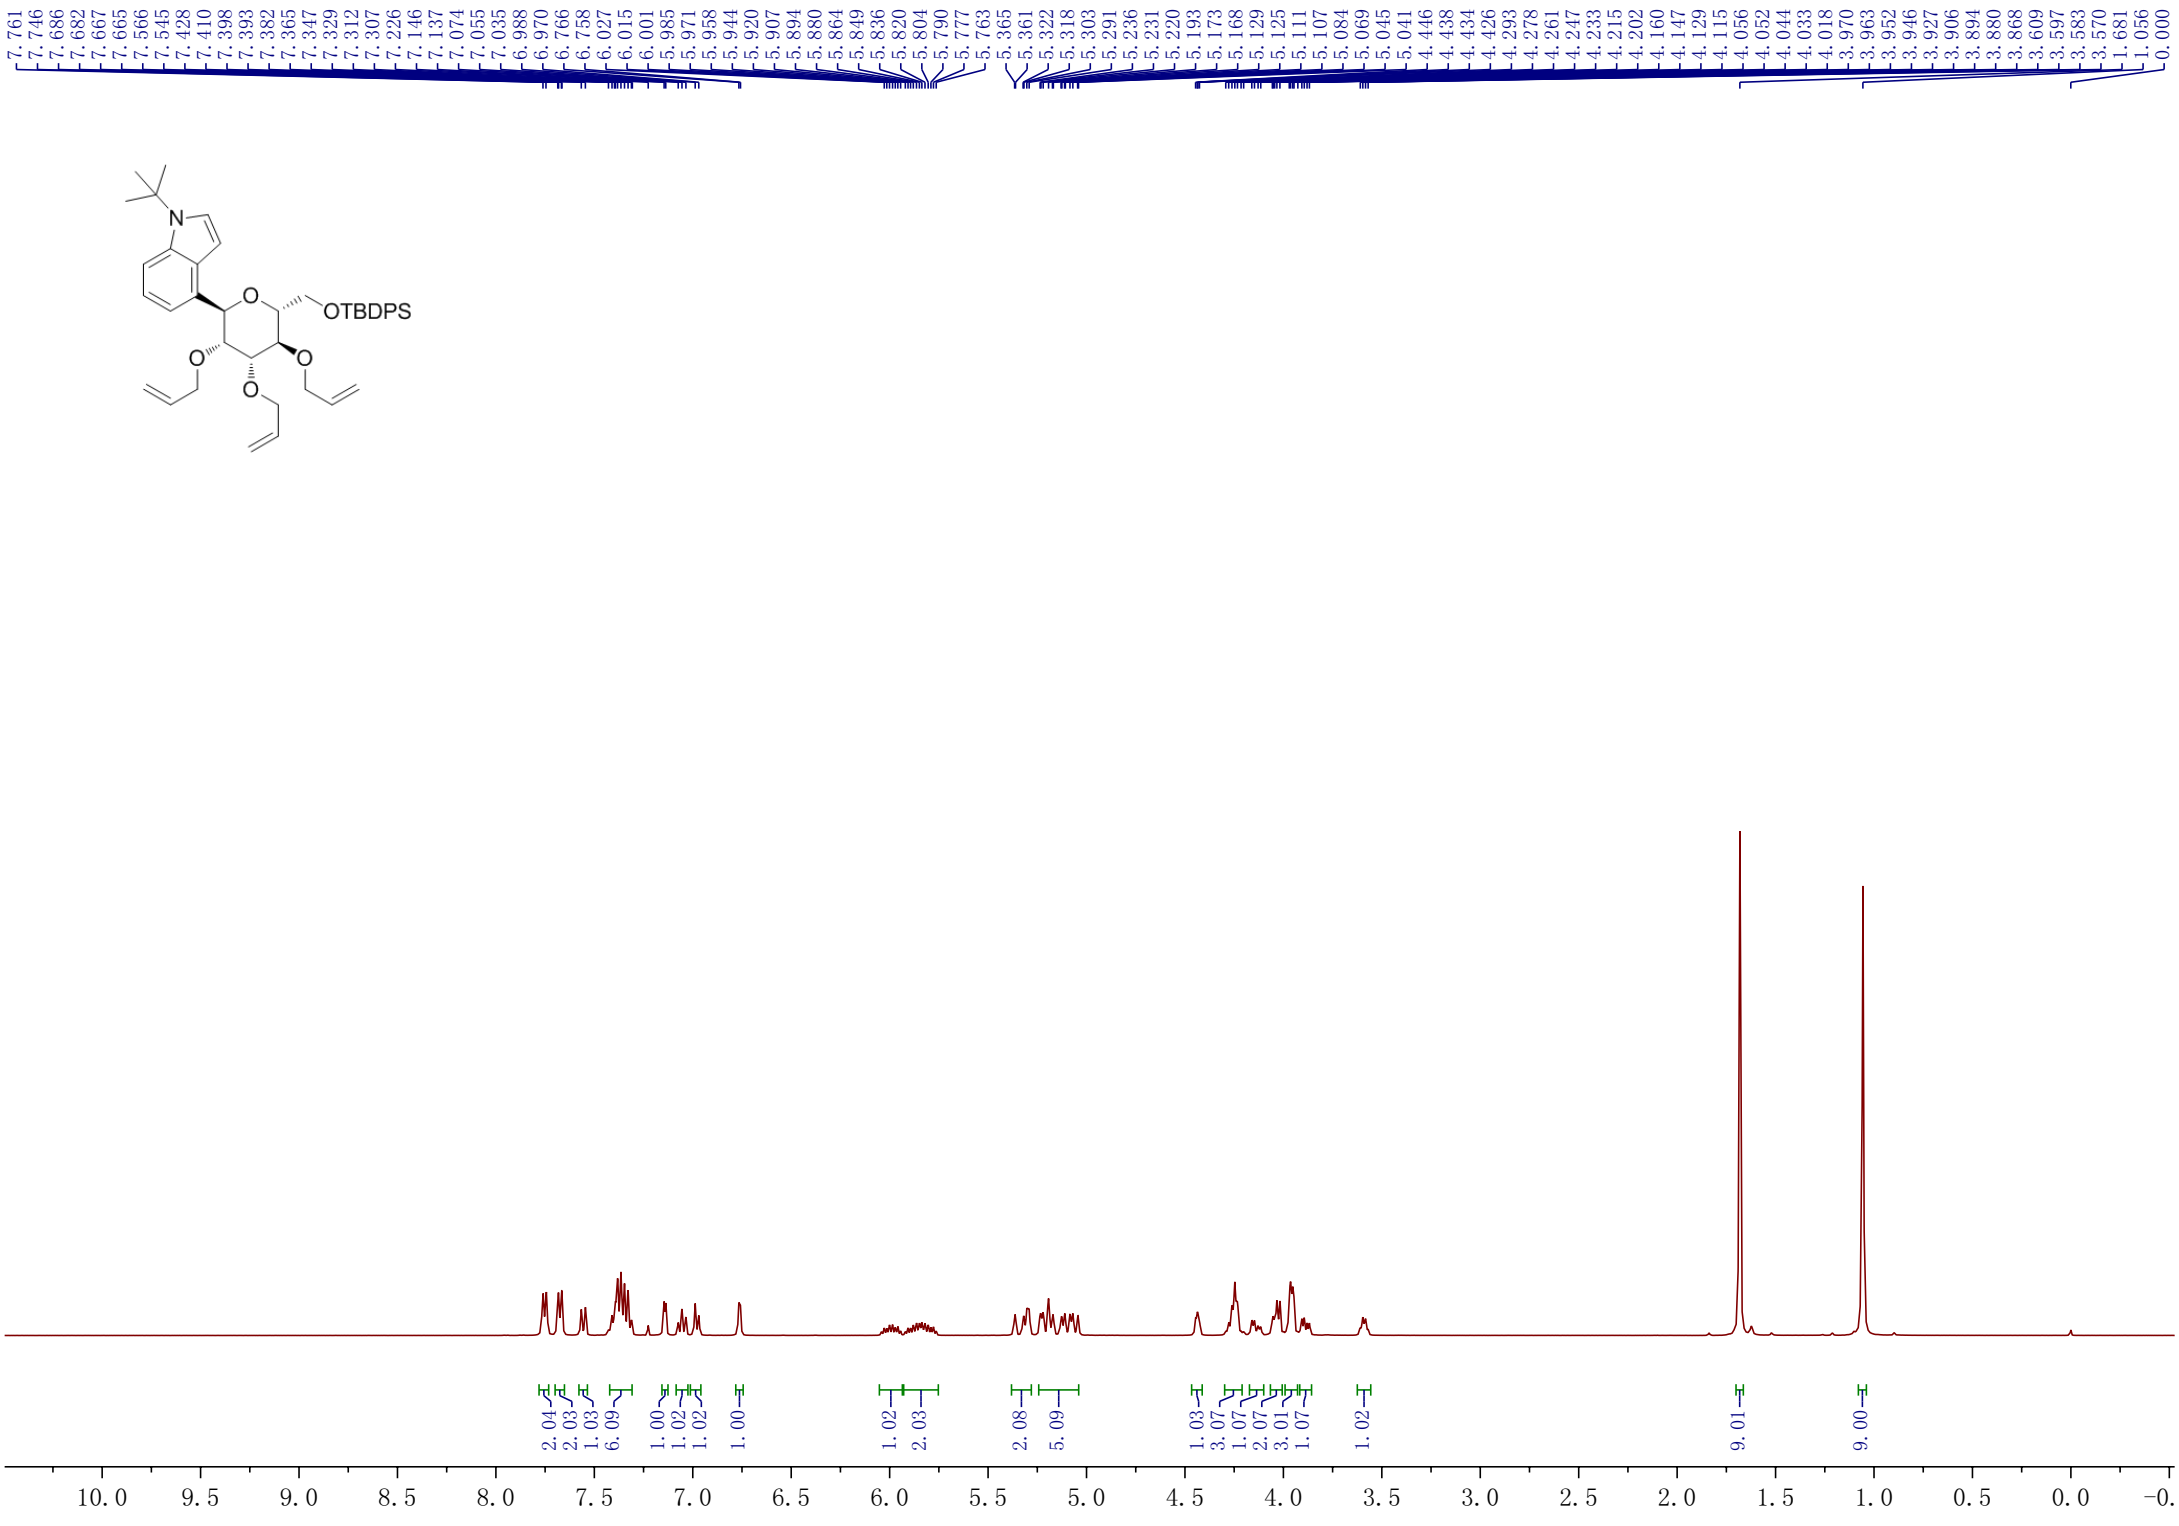

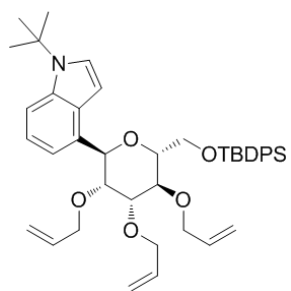

135.872  
135.565  
135.451  
135.332  
135.297  
135.199  
133.921  
133.655  
130.760  
129.410  
128.905  
127.545  
127.473  
124.931  
119.907  
117.483  
116.953  
116.703  
116.306  
113.130

100.577

78.177  
77.319  
77.001  
76.683  
75.200  
75.030  
74.807  
74.218  
72.469  
71.601  
71.150  
63.019

55.577

29.798  
26.846

19.292

220 210 200 190 180 170 160 150 140 130 120 110 100 90 80 70 60 50 40 30 20 10 0



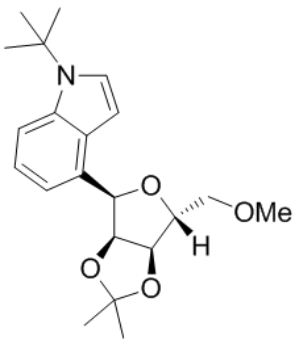

7.59  
7.58  
7.30  
7.29  
7.24  
7.18  
7.17  
7.16  
7.16  
7.16  
7.14  
7.13  
7.12  
6.63  
6.63  
6.63  
6.62

5.28  
5.27  
4.77  
4.77  
4.76  
4.76  
4.75  
4.71  
4.71  
4.70  
4.69  
4.27  
4.27  
4.26  
4.25  
4.24  
4.24  
3.72  
3.72  
3.71  
3.71  
3.70  
3.70  
3.69  
3.69  
3.68  
3.68  
3.67  
3.67  
3.67  
3.46  
3.46

1.72  
1.66  
1.34  
1.34

0.00  
-0.00

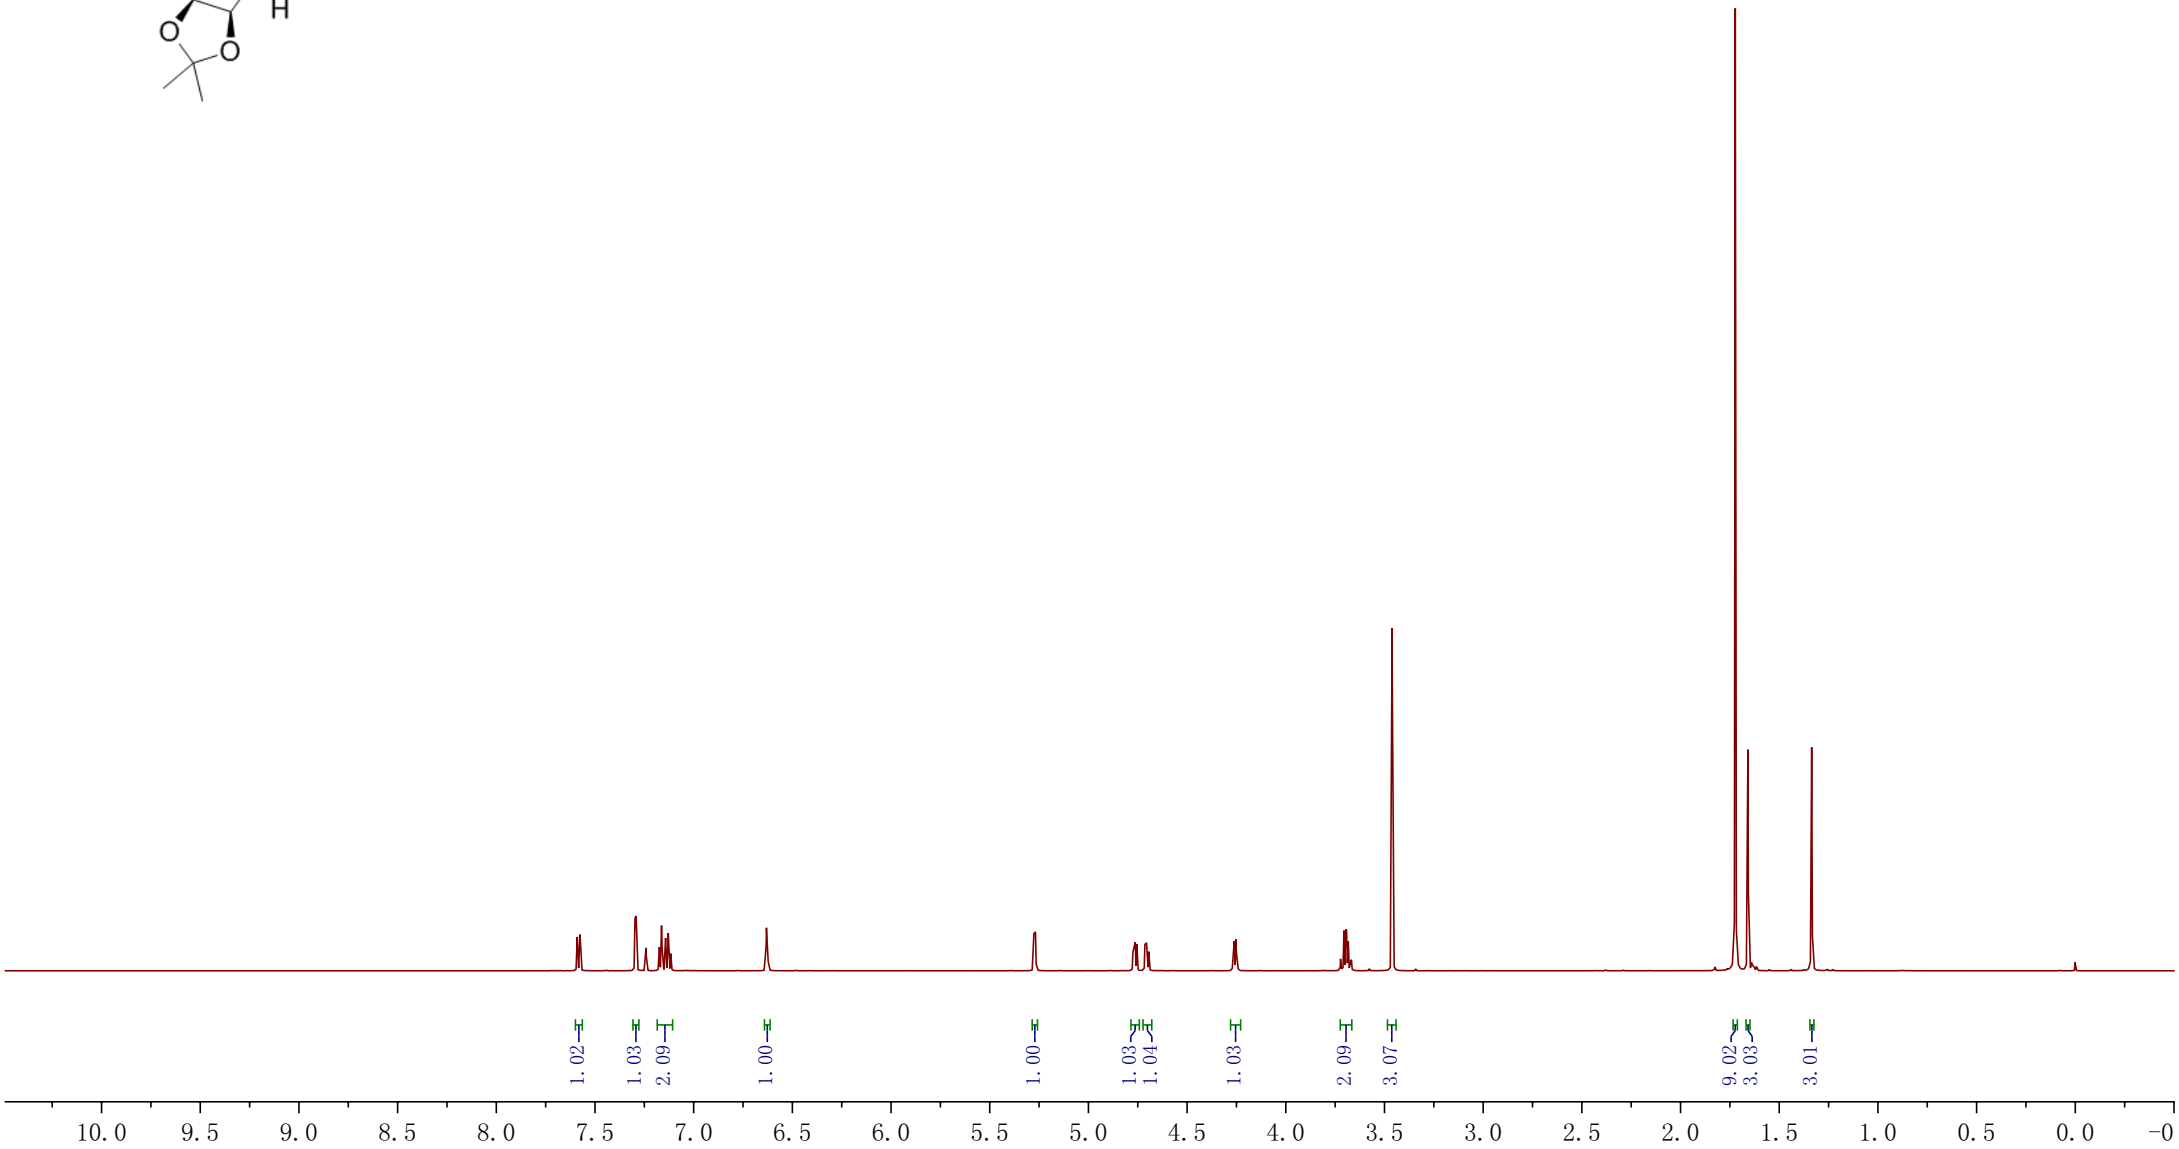

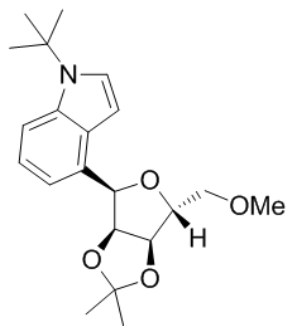

135.05  
131.42  
127.44  
125.16

120.42  
115.78  
114.75  
113.08

98.59

86.32  
85.45  
83.14  
82.06  
77.21  
77.00  
76.79  
72.86

59.49  
55.75

29.80  
27.52  
25.49

220 210 200 190 180 170 160 150 140 130 120 110 100 90 80 70 60 50 40 30 20 10 0

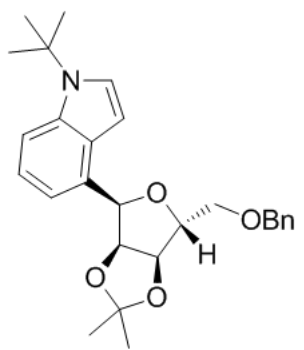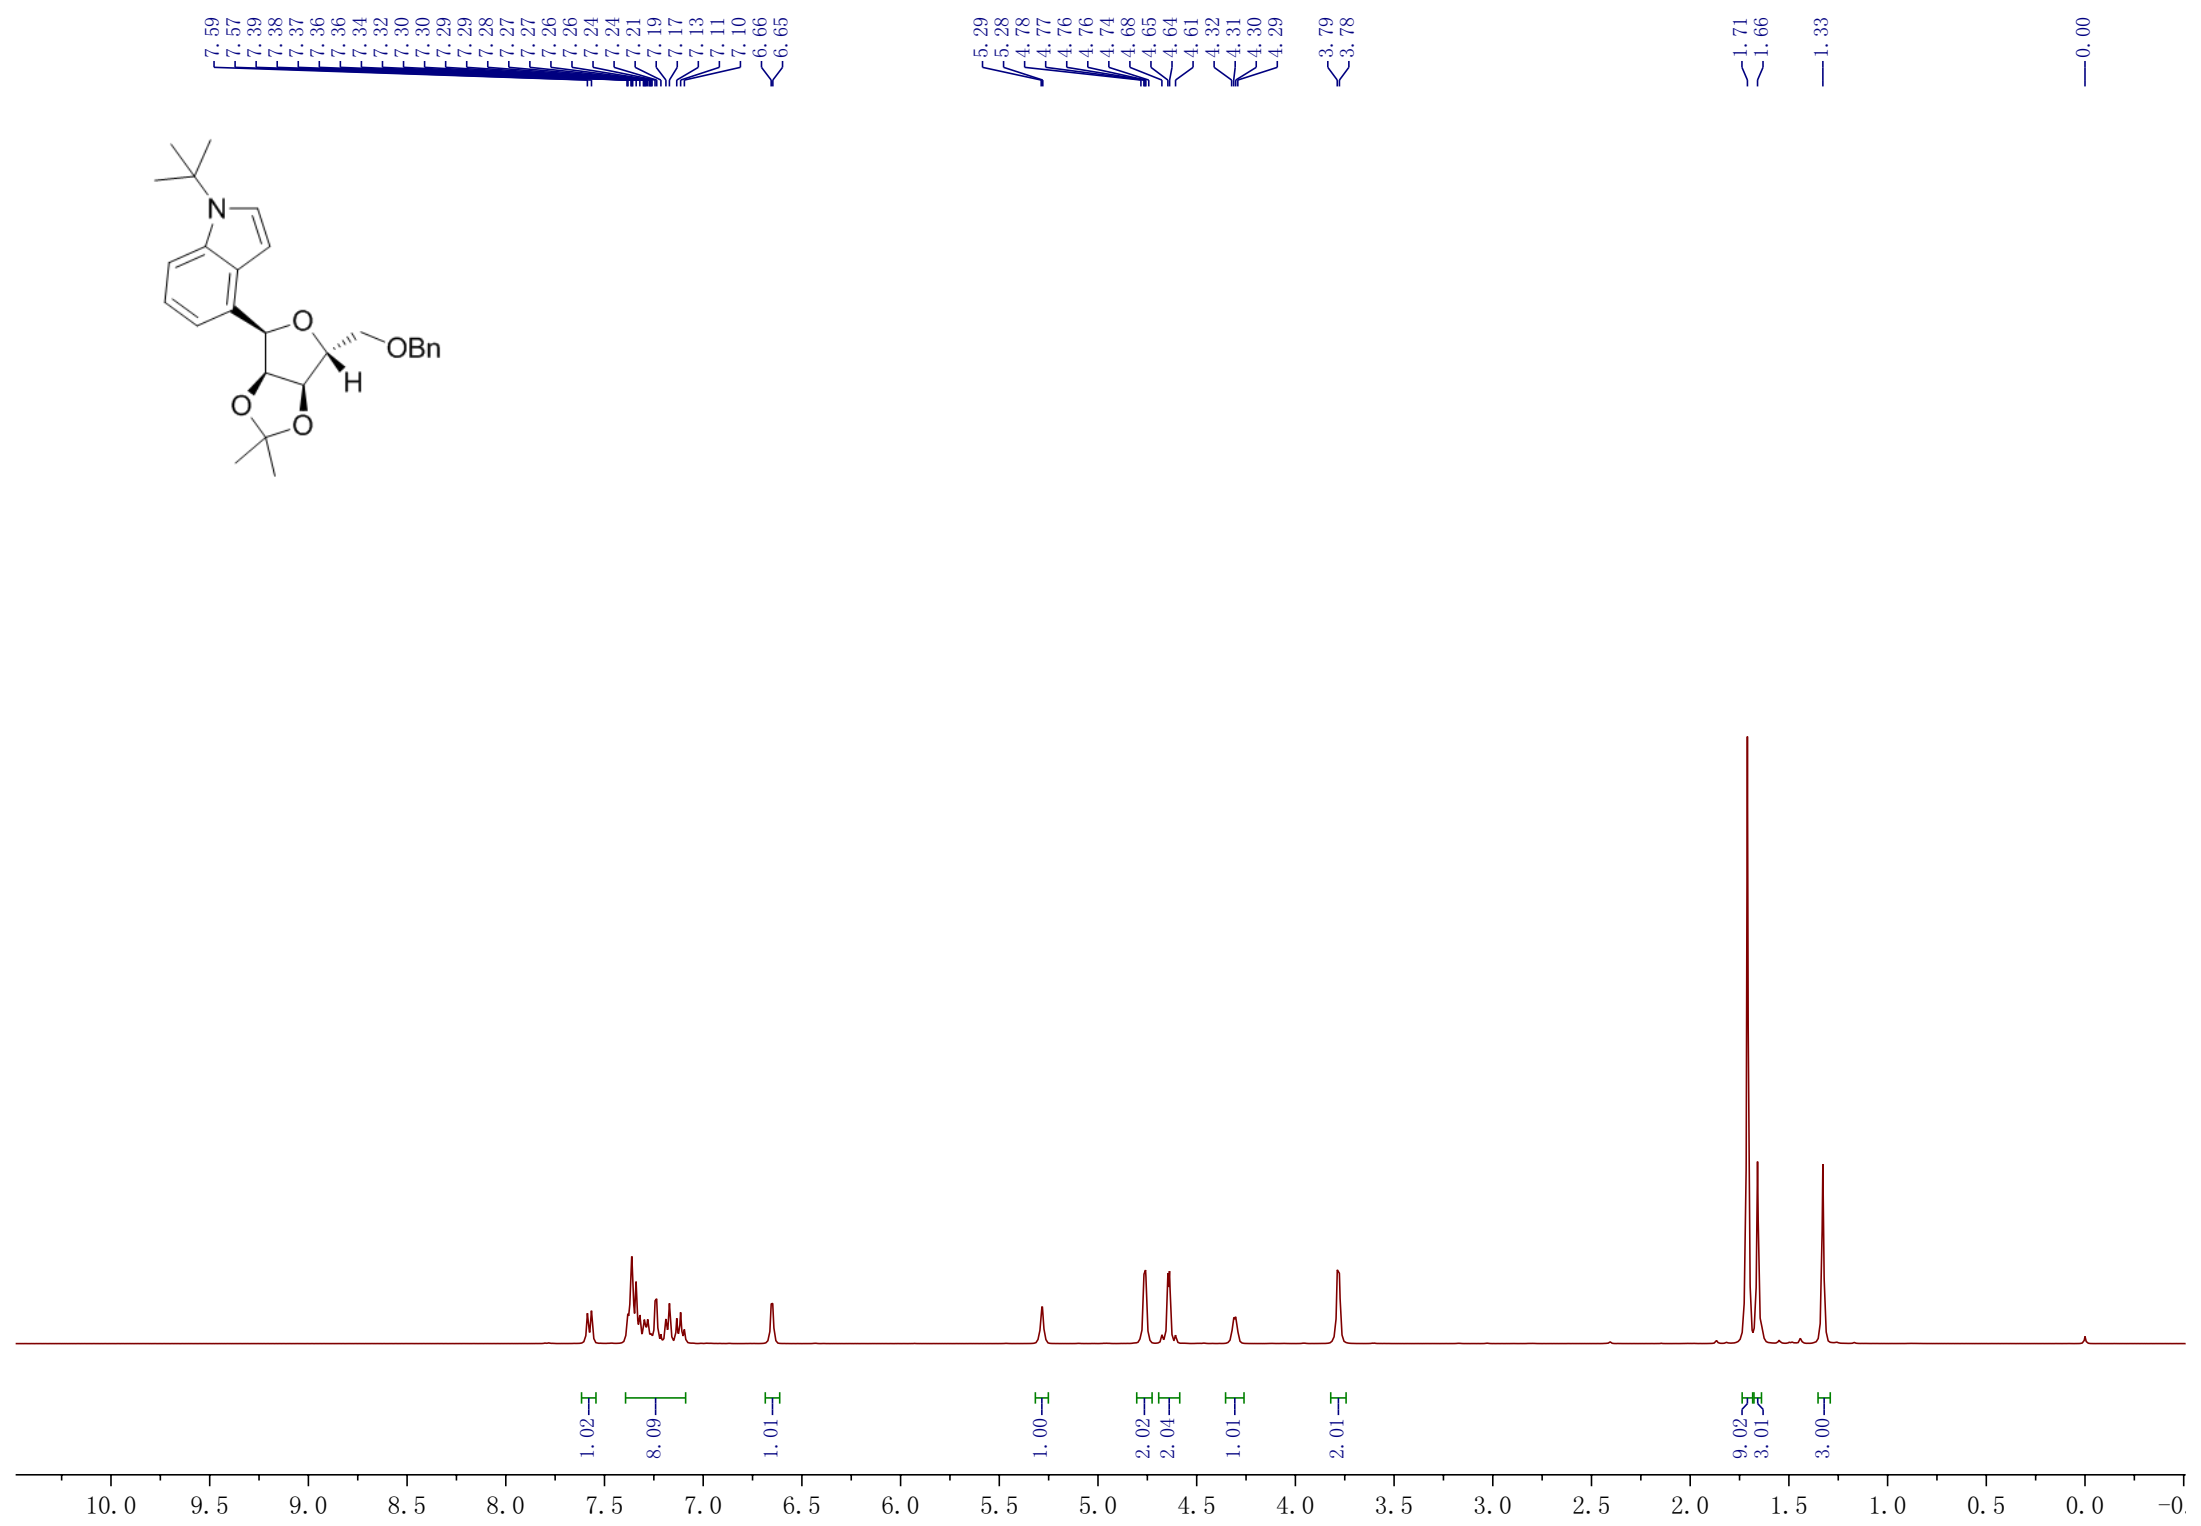

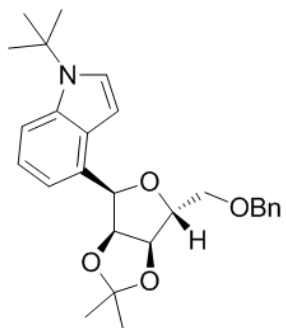

138.12  
135.03  
131.50  
128.28  
127.73  
127.52  
127.40  
125.10  
— 120.39  
115.81  
114.59  
113.05

— 98.73

86.35  
85.53  
83.39  
81.89  
77.32  
77.00  
76.68  
73.53  
70.21

— 55.70

29.77  
27.54  
25.51

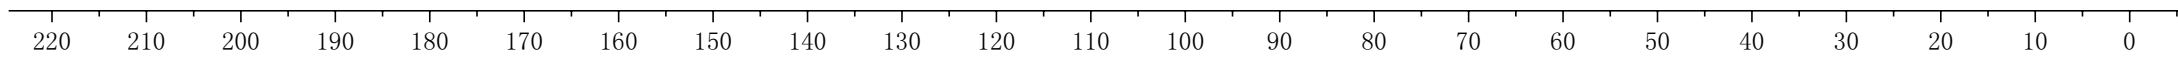

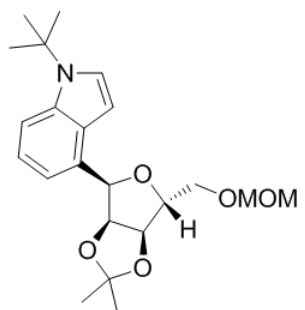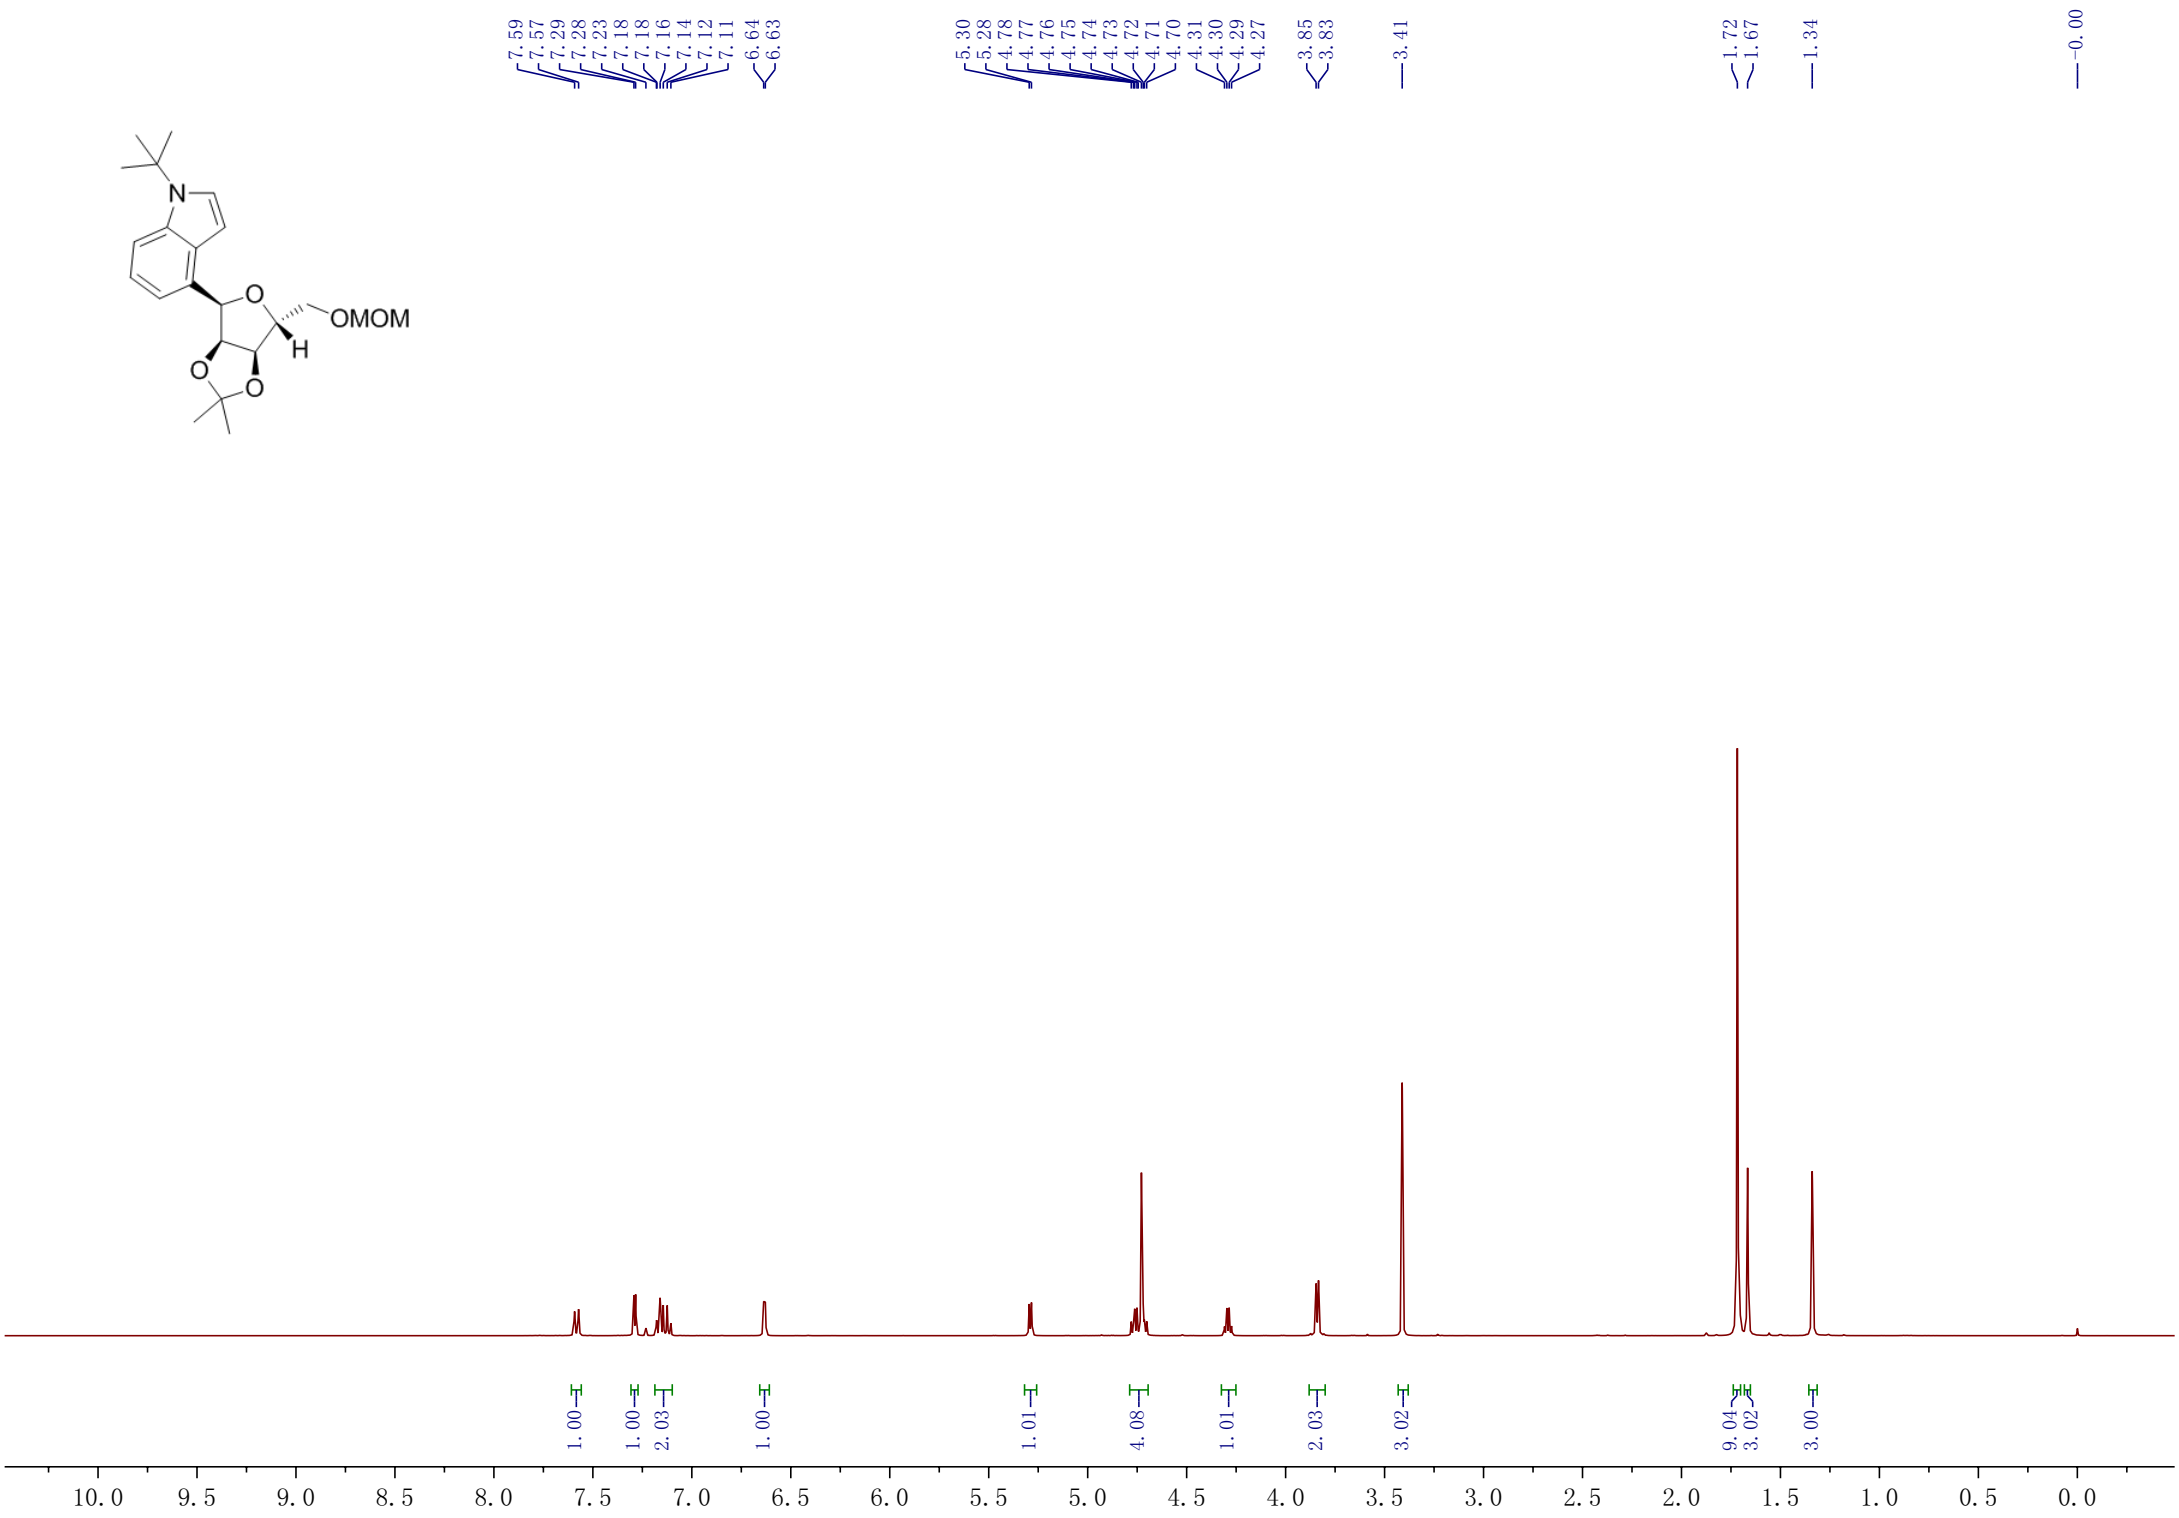

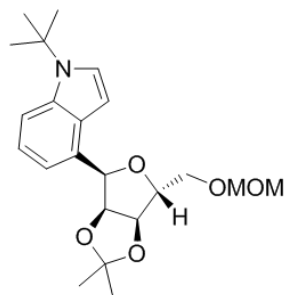

135.02  
131.41  
127.39  
125.11

120.41  
115.62  
114.72  
113.05

98.58  
96.75

86.38  
85.35  
83.12  
82.04  
77.32  
77.00  
76.68

67.75

55.73  
55.31

29.77  
27.51  
25.48

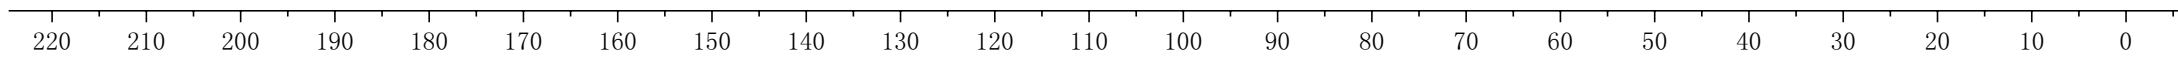

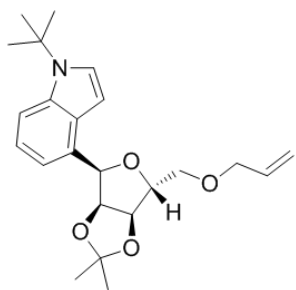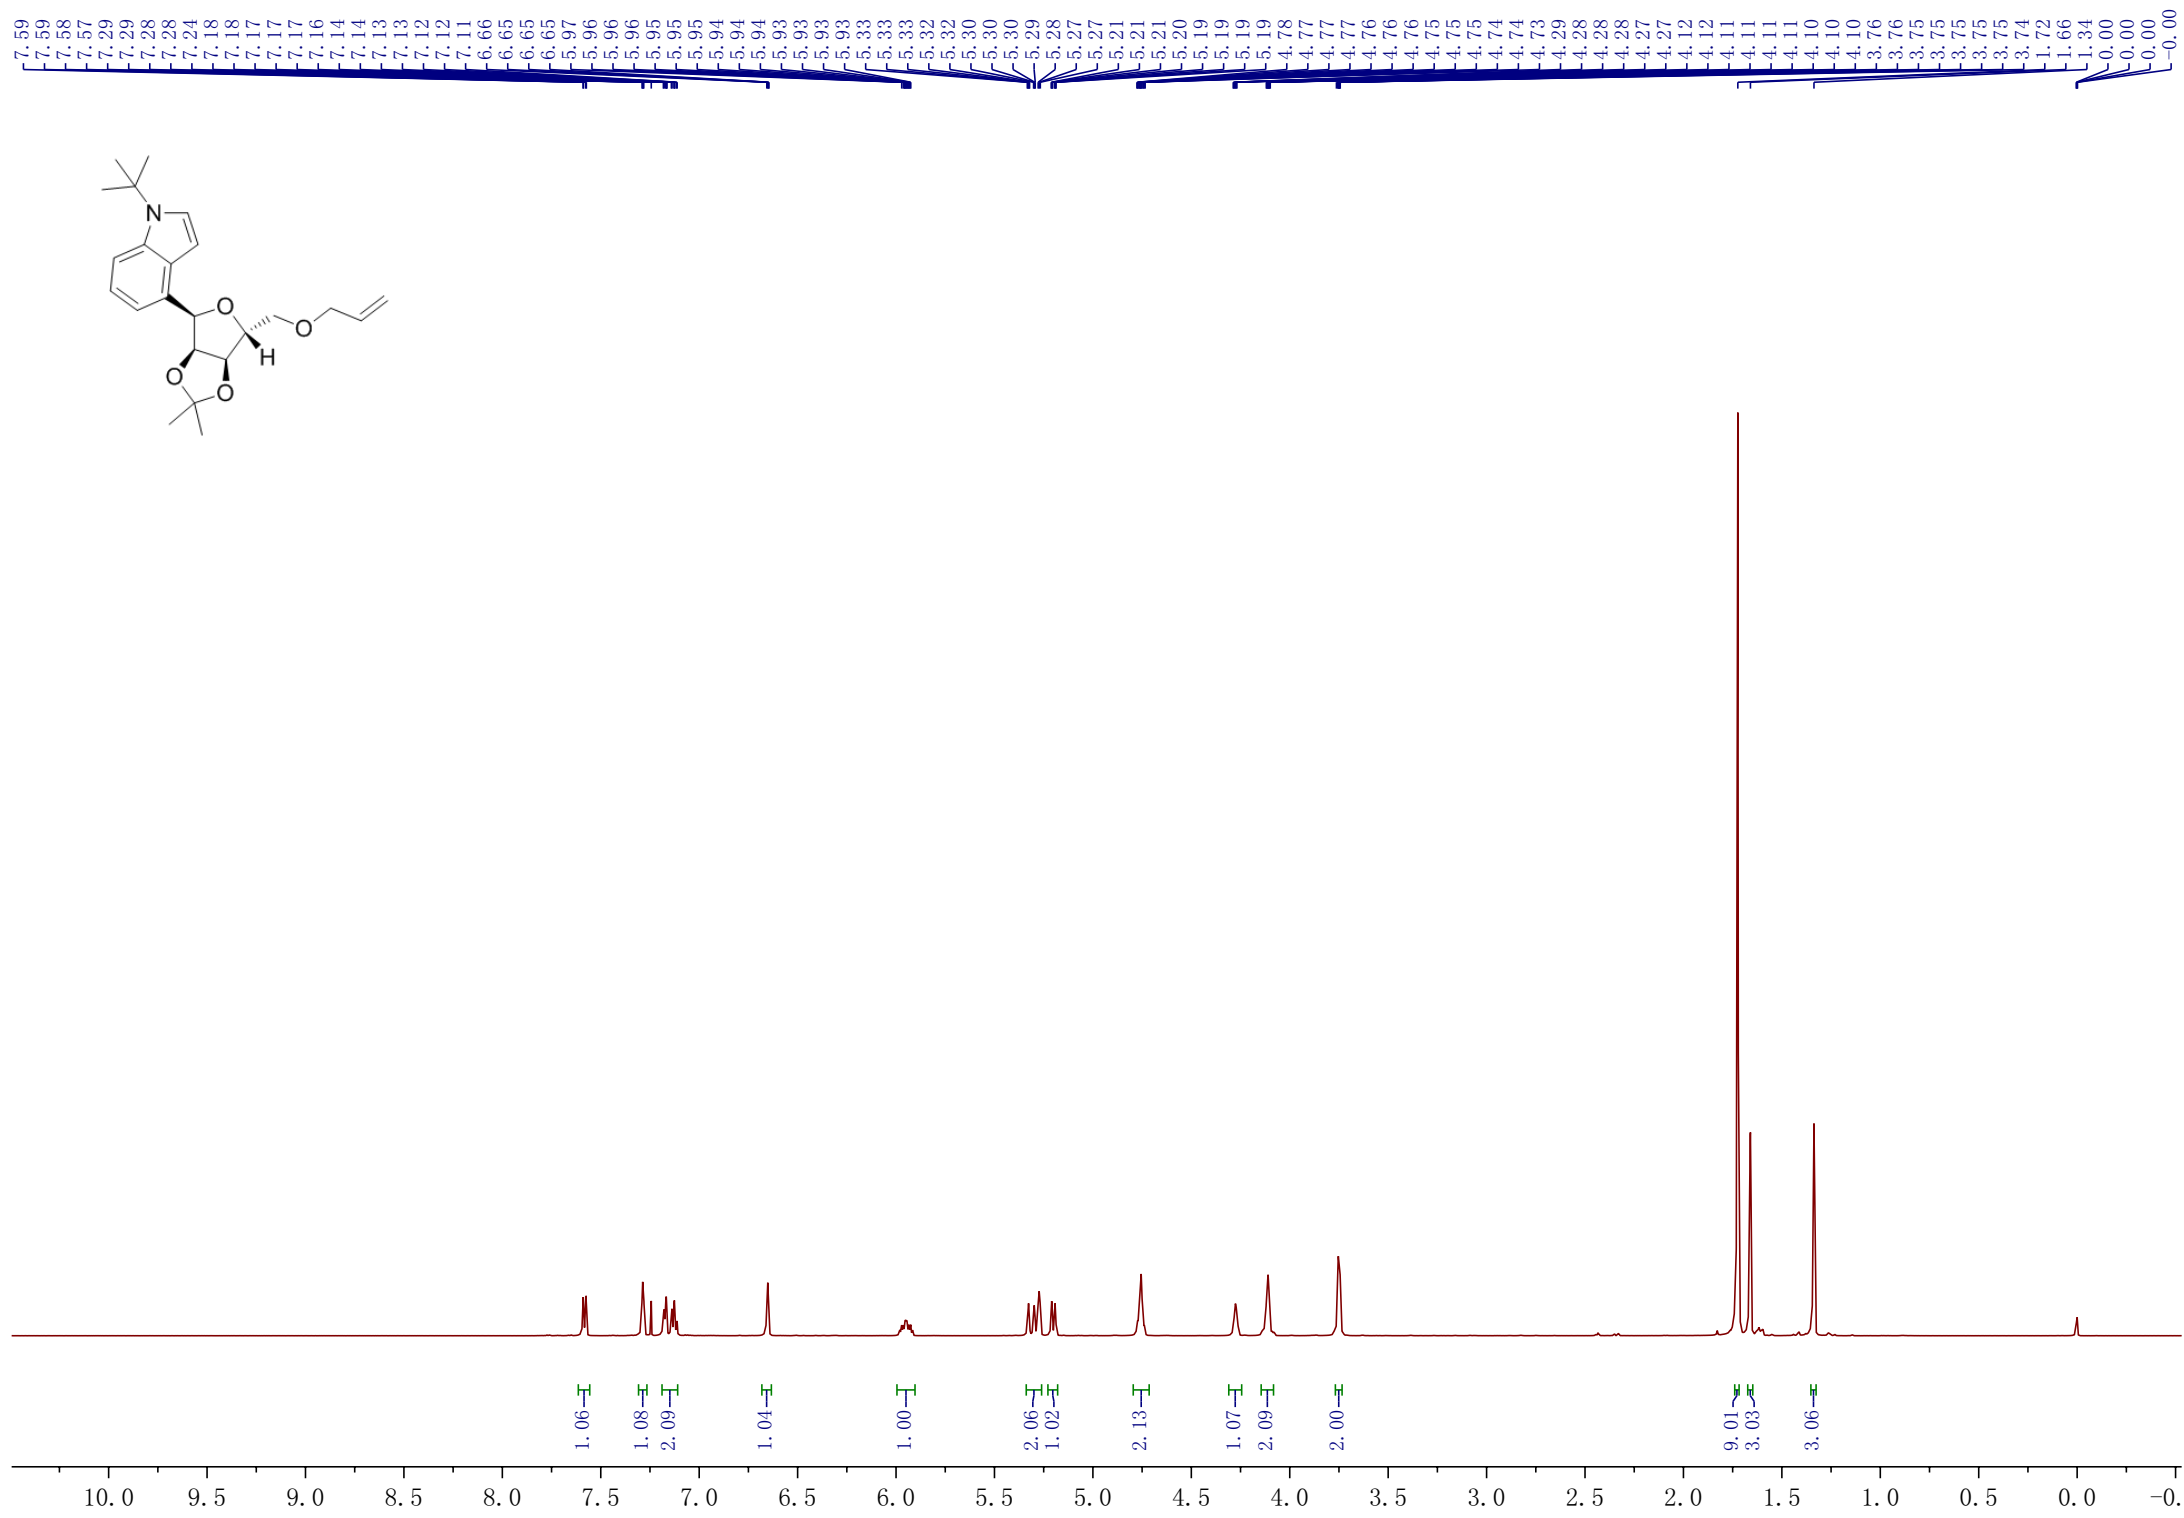

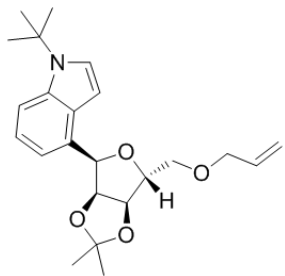

135.01  
134.62  
131.46  
127.40  
125.05  
120.36  
117.02  
115.79  
114.56  
113.01

98.67

86.30  
85.47  
83.32  
81.89  
77.21  
77.00  
76.79  
72.48  
70.11

55.66

29.74  
27.52  
25.49

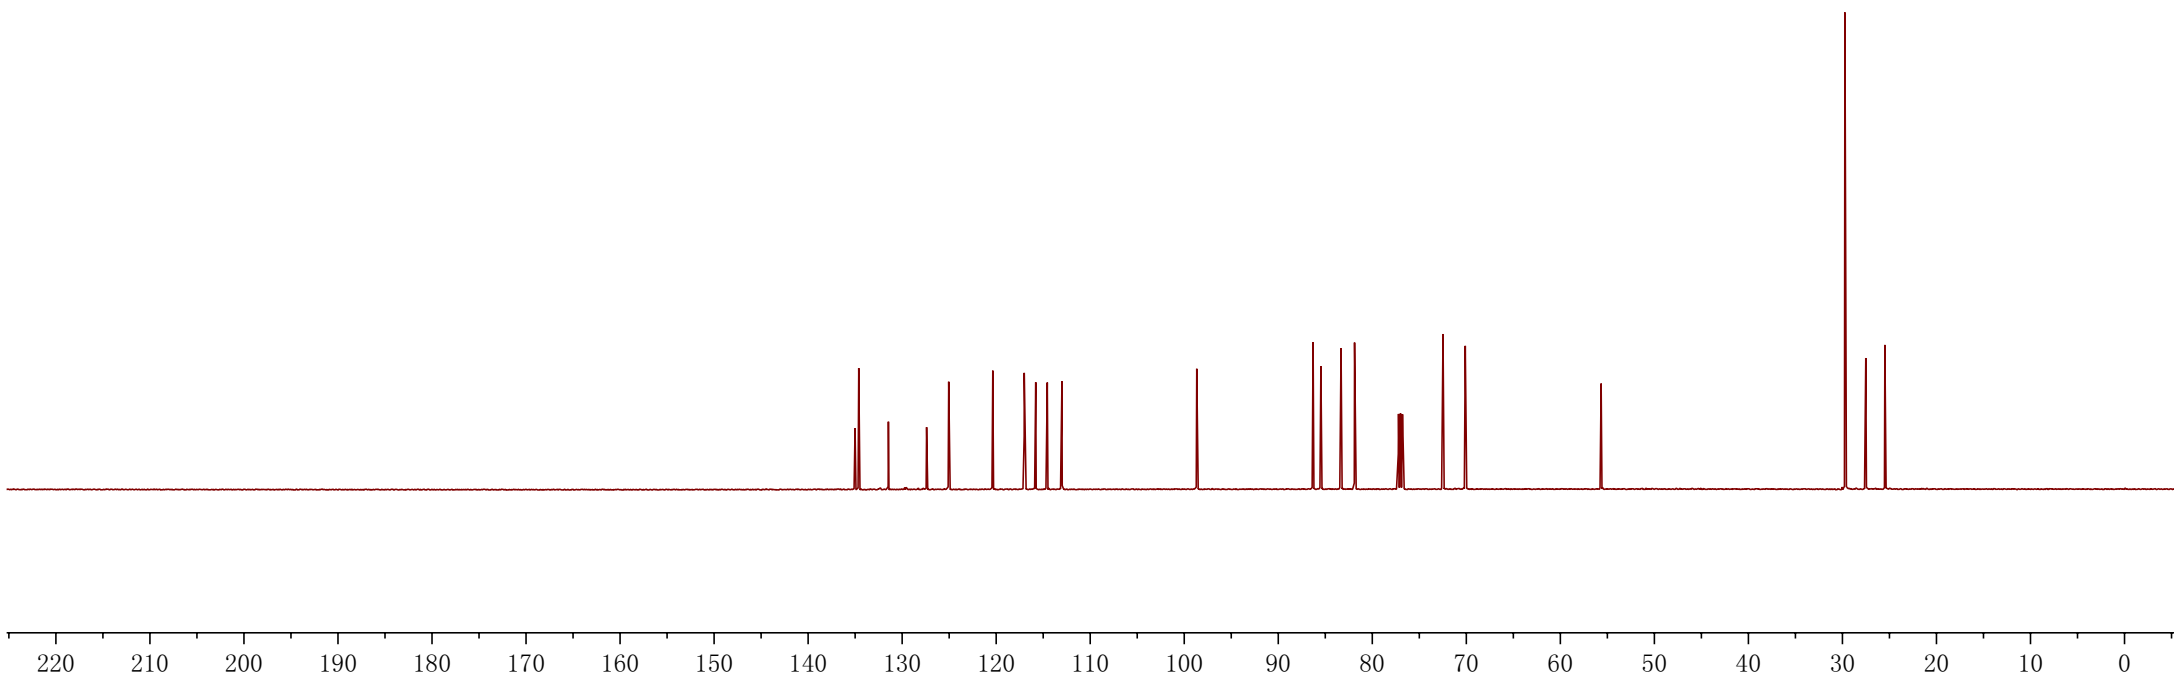



7.75  
7.75  
7.75  
7.74  
7.74  
7.74  
7.73  
7.72  
7.71  
7.71  
7.58  
7.57  
7.42  
7.41  
7.40  
7.38  
7.37  
7.37  
7.37  
7.36  
7.36  
7.35  
7.25  
7.25  
7.24  
7.24  
7.24  
7.23  
7.23  
7.19  
6.67

5.32  
5.31  
4.84  
4.83  
4.82  
4.82  
4.72  
4.71  
4.71  
4.70  
4.25  
4.24  
4.24  
4.23  
4.01  
4.01  
4.00  
3.99  
3.95  
3.94  
3.93  
3.92

1.72  
1.66  
1.34  
1.09

0.00  
-0.00

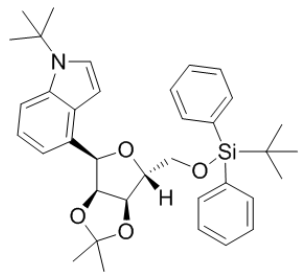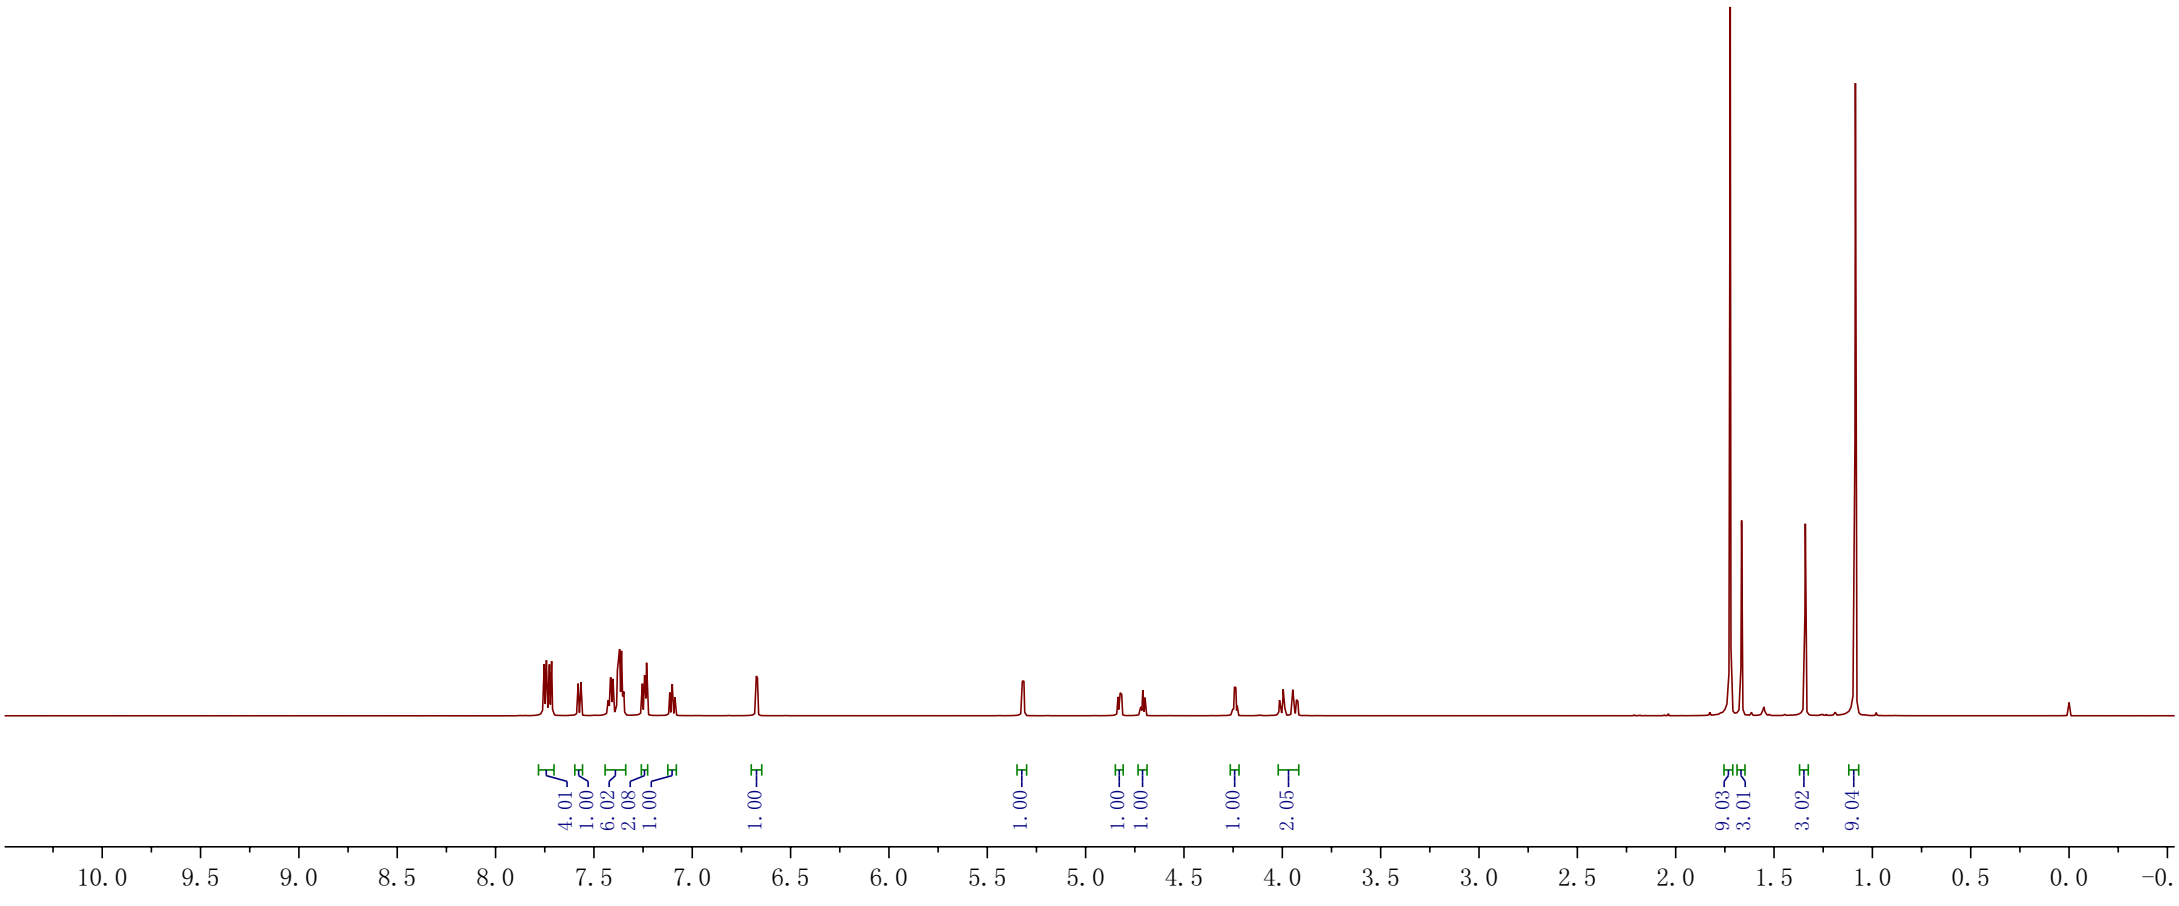

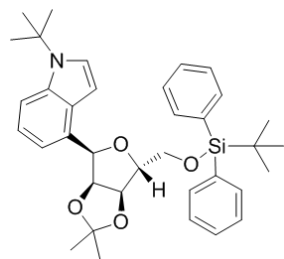

135.72  
135.70  
134.99  
133.40  
133.32  
131.89  
129.66  
129.61  
127.69  
127.67  
127.51  
125.07  
120.49  
115.49  
114.34  
112.87

— 98.85

86.57  
84.96  
84.50  
81.44  
77.21  
77.00  
76.79

— 63.99

— 55.74

29.83  
27.67  
26.88  
25.62

— 19.30

220 210 200 190 180 170 160 150 140 130 120 110 100 90 80 70 60 50 40 30 20 10 0

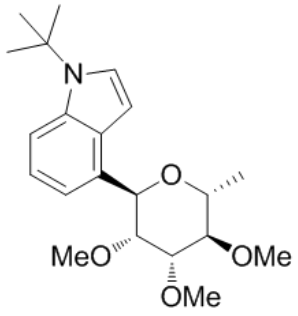

7.612  
7.591  
7.294  
7.285  
7.257  
7.123  
7.104  
7.084  
6.974  
6.956  
6.836  
6.828

5.437  
5.428

4.363  
4.355  
4.347  
3.750  
3.742  
3.730  
3.722  
3.591  
3.514  
3.477  
3.432  
3.428  
3.416  
3.412  
3.397  
3.319  
3.299  
3.279

1.727

1.313  
1.298

0.000

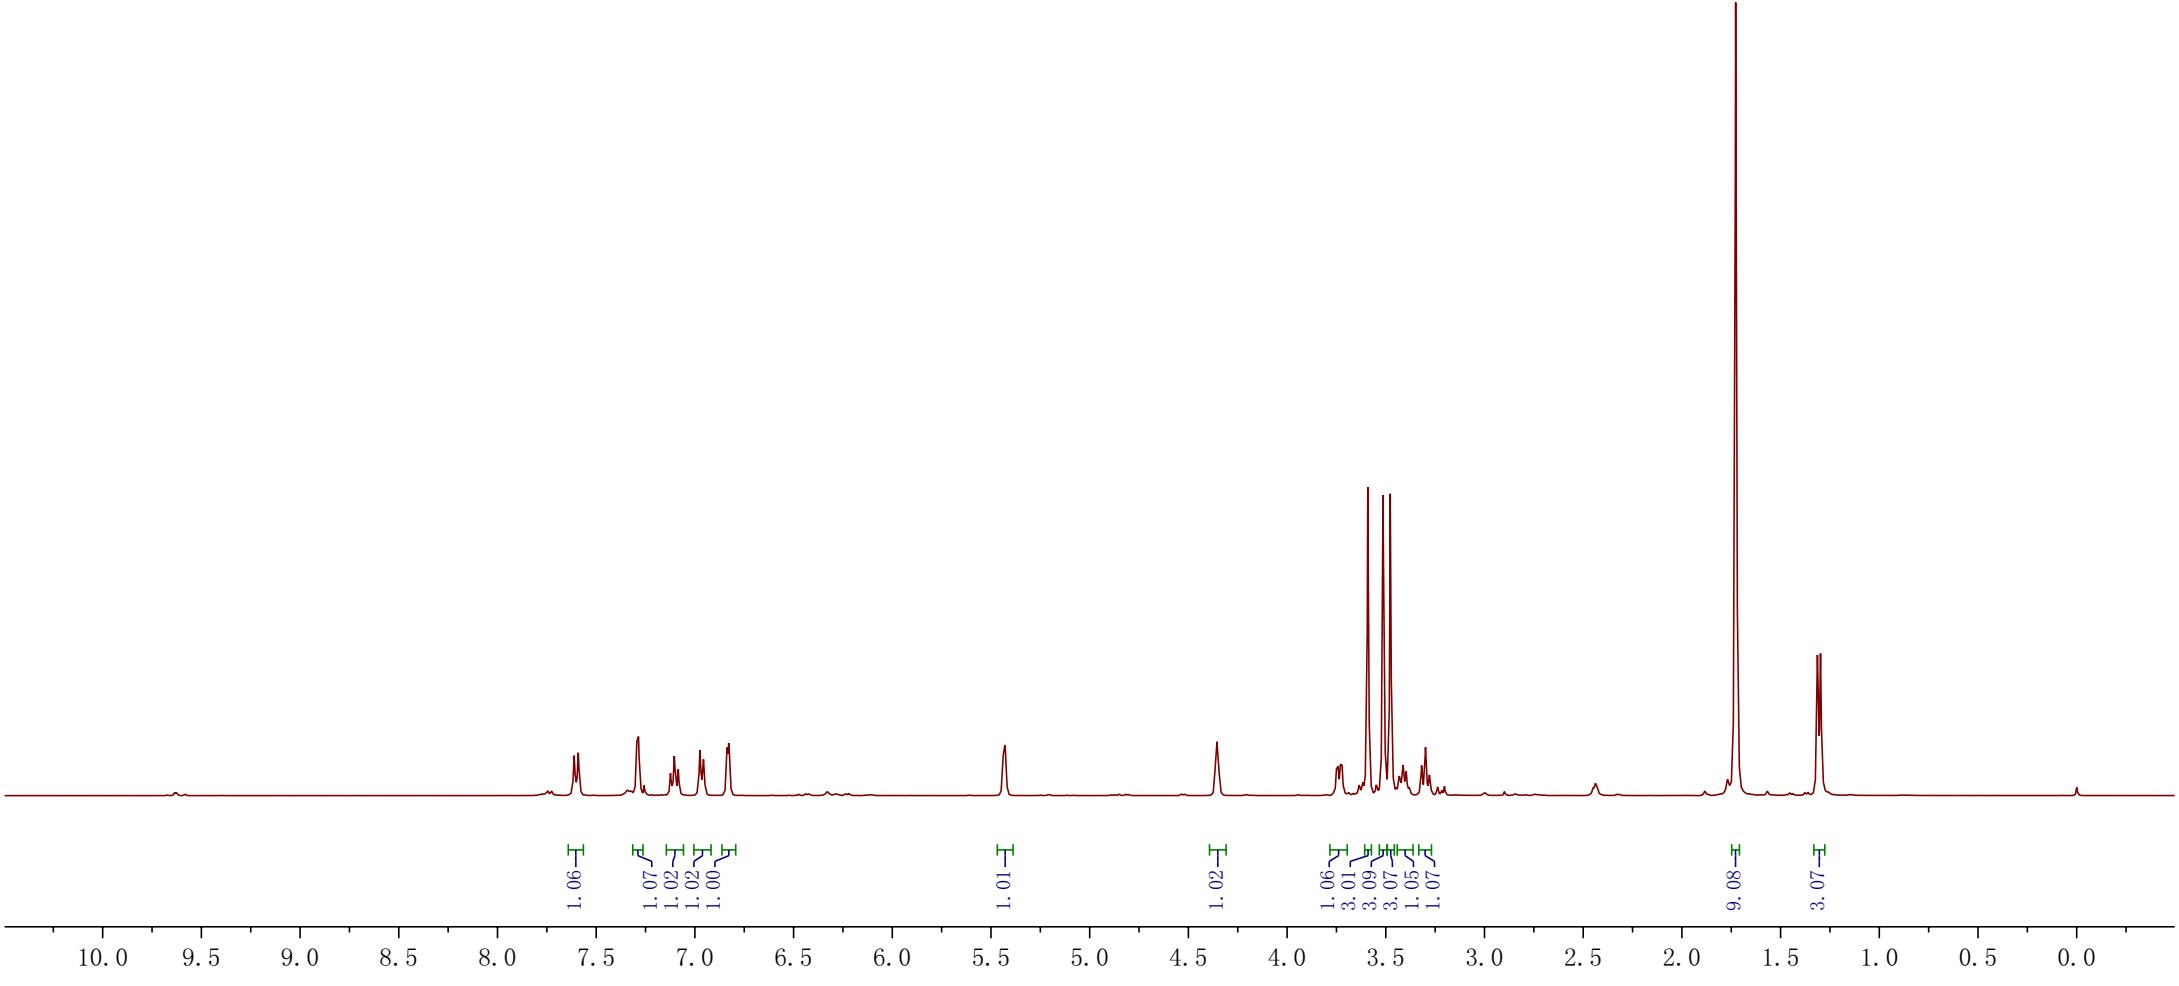

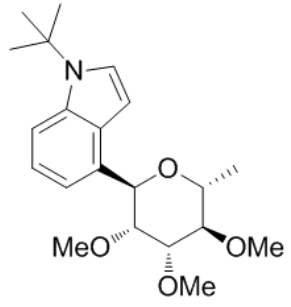

135.280  
130.176  
129.065  
125.047  
119.967  
116.725  
113.260

100.268

82.186  
80.982  
77.318  
77.198  
77.000  
76.682  
73.266  
69.802

60.052  
58.336  
57.718  
55.675

29.761

17.743

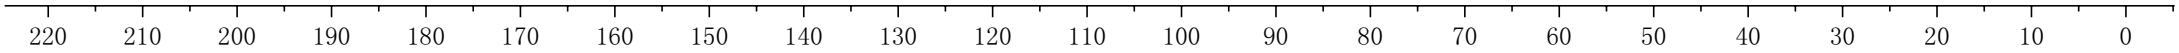

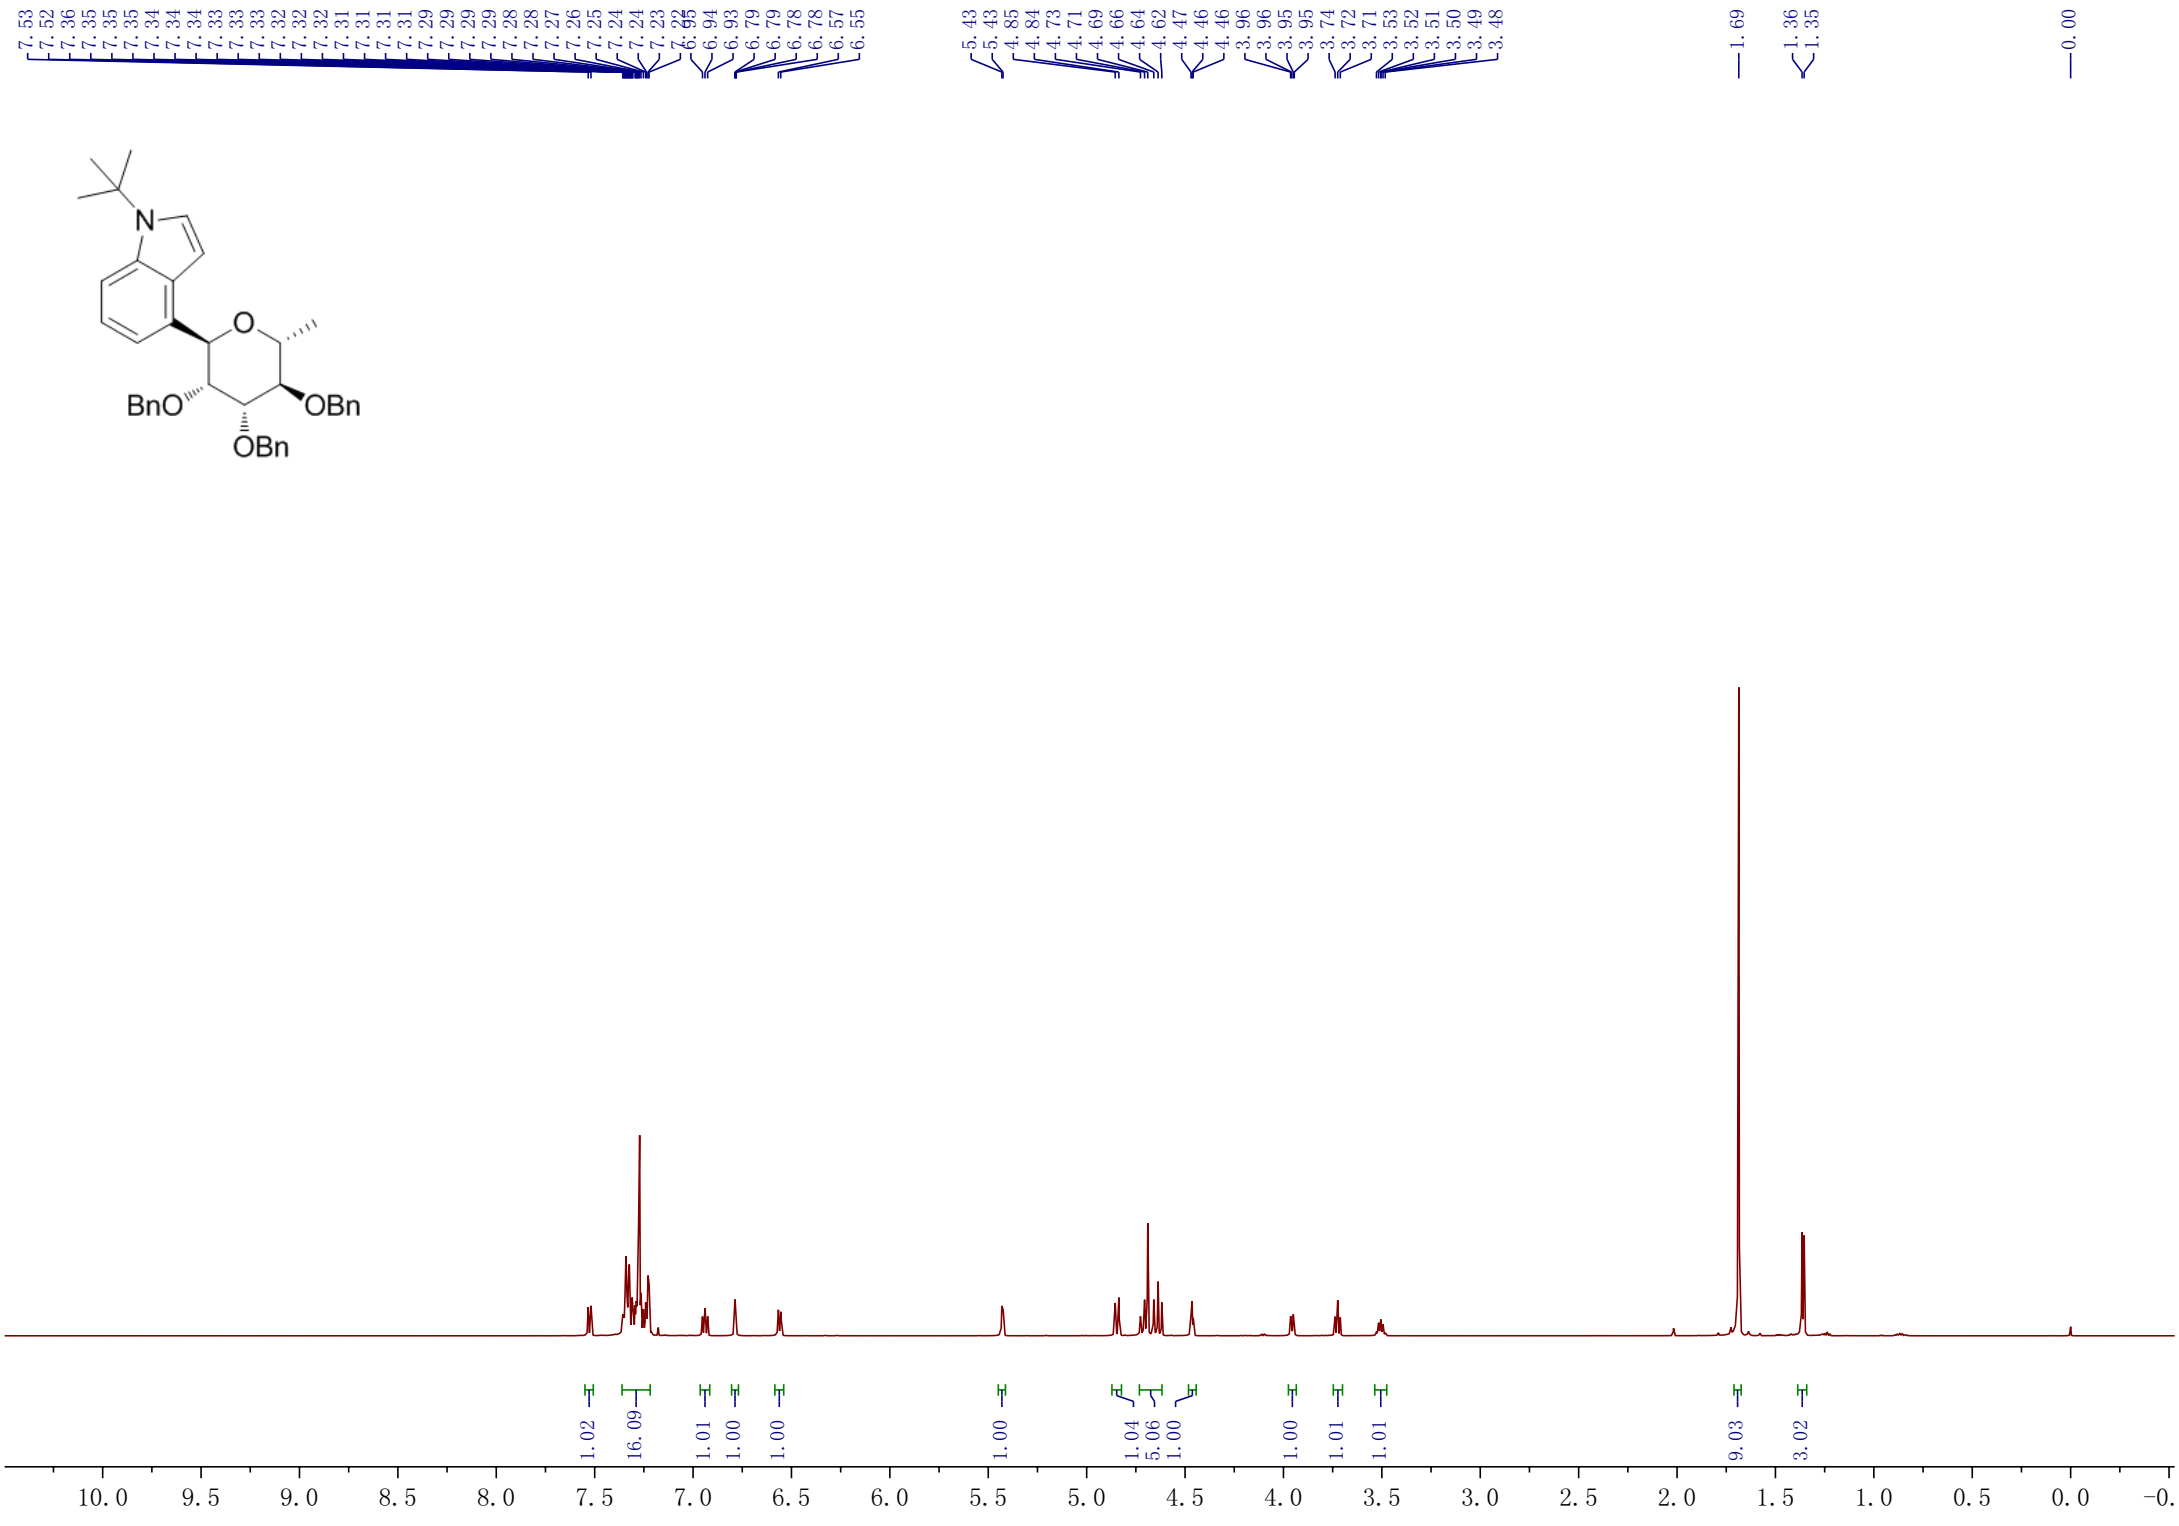

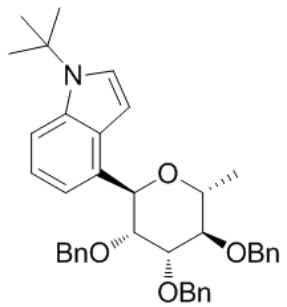

138.64  
138.59  
138.48  
135.22  
130.25  
128.88  
128.29  
128.22  
128.18  
128.04  
128.00  
127.68  
127.55  
127.42  
127.41  
124.92  
119.96  
116.80  
113.06

100.39

80.96  
78.90  
77.21  
77.00  
76.79  
74.90  
74.41  
74.38  
72.41  
72.00  
70.30

55.59

29.75

17.99

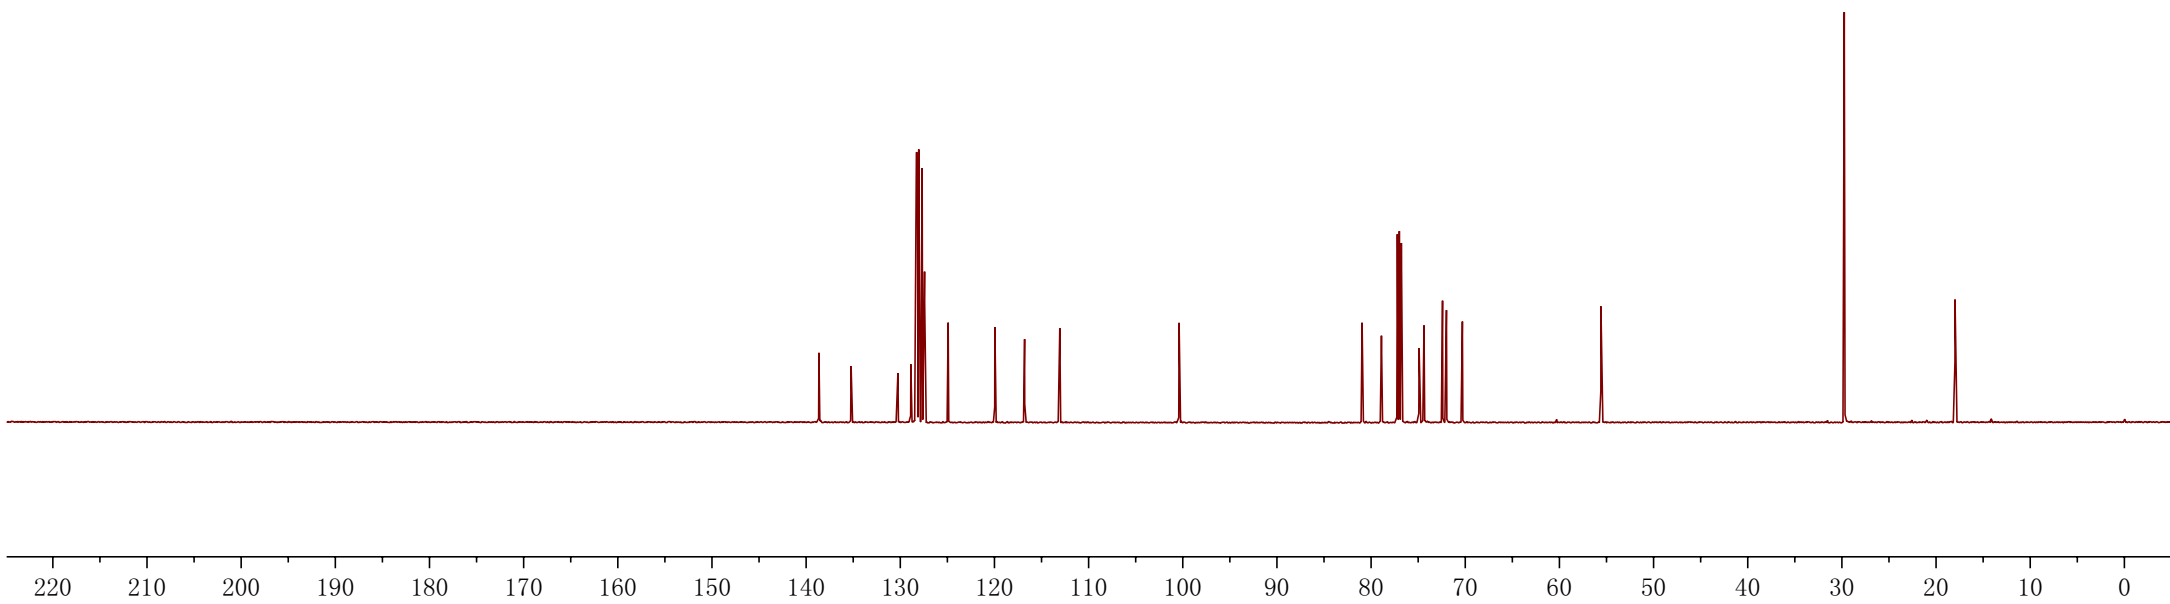

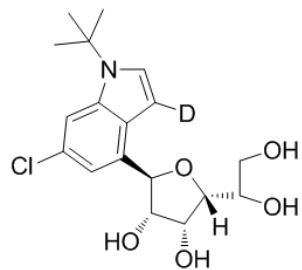

7.60  
7.33  
7.32  
7.11

5.14  
5.13  
4.89  
4.35  
4.34  
4.34  
4.24  
4.24  
4.23  
4.22  
4.21  
4.20  
4.08  
4.07  
4.06  
3.87  
3.85  
3.71  
3.70  
3.69  
3.68  
3.35  
3.31

1.65

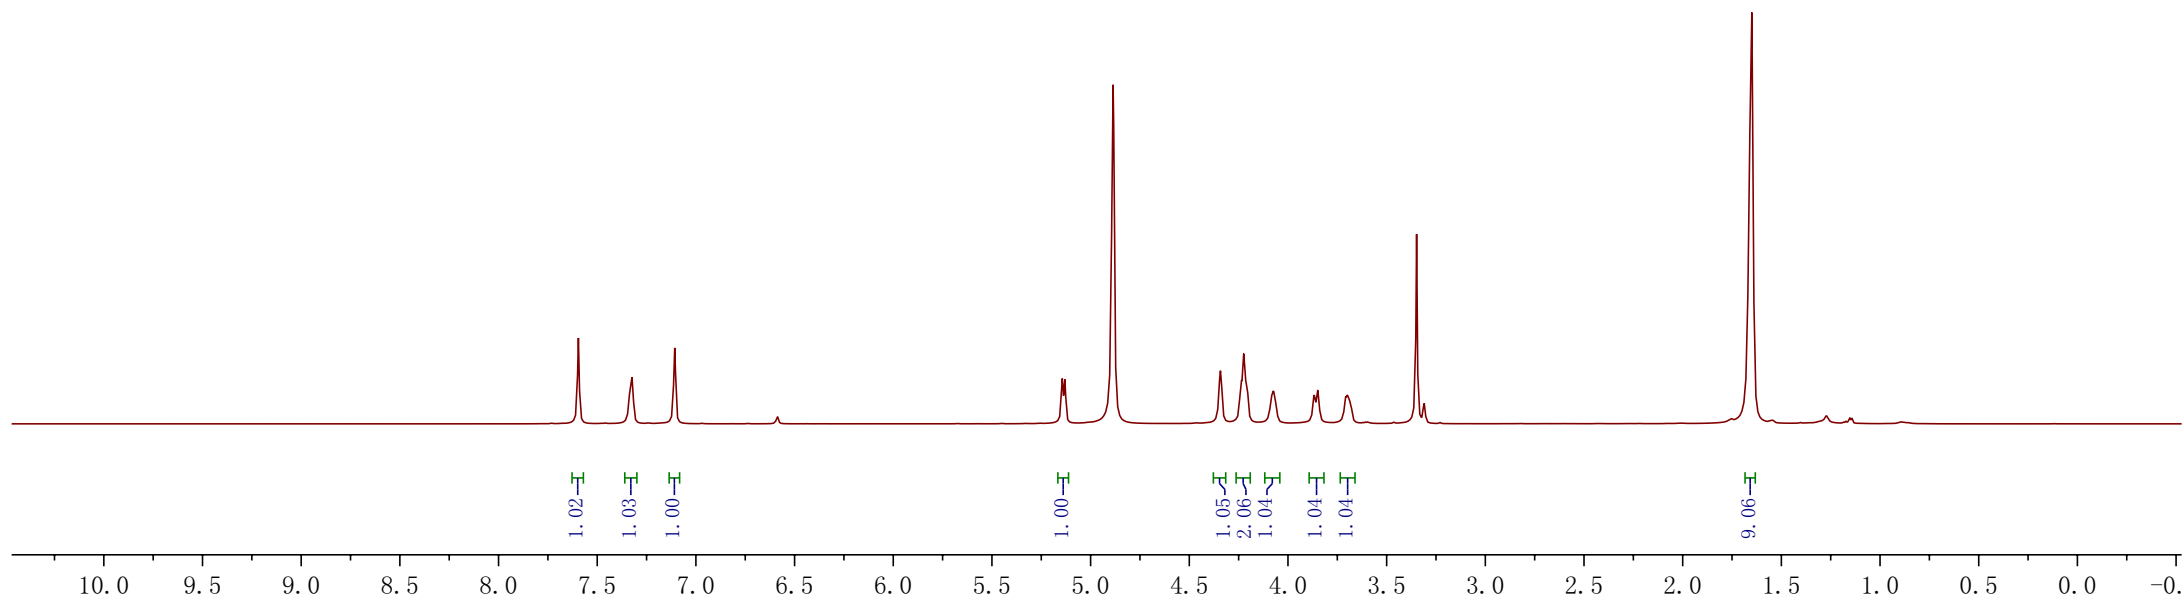

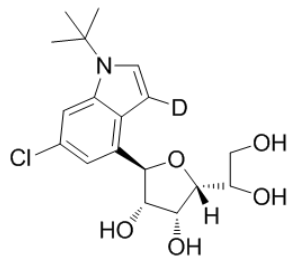

136.43  
135.53  
127.84  
127.10  
126.81  
117.06  
113.09  
100.08  
82.71  
81.34  
79.88  
73.57  
71.58  
64.63  
56.77  
49.65  
49.23  
49.08  
48.94  
48.80  
48.66  
48.52  
48.37  
29.73

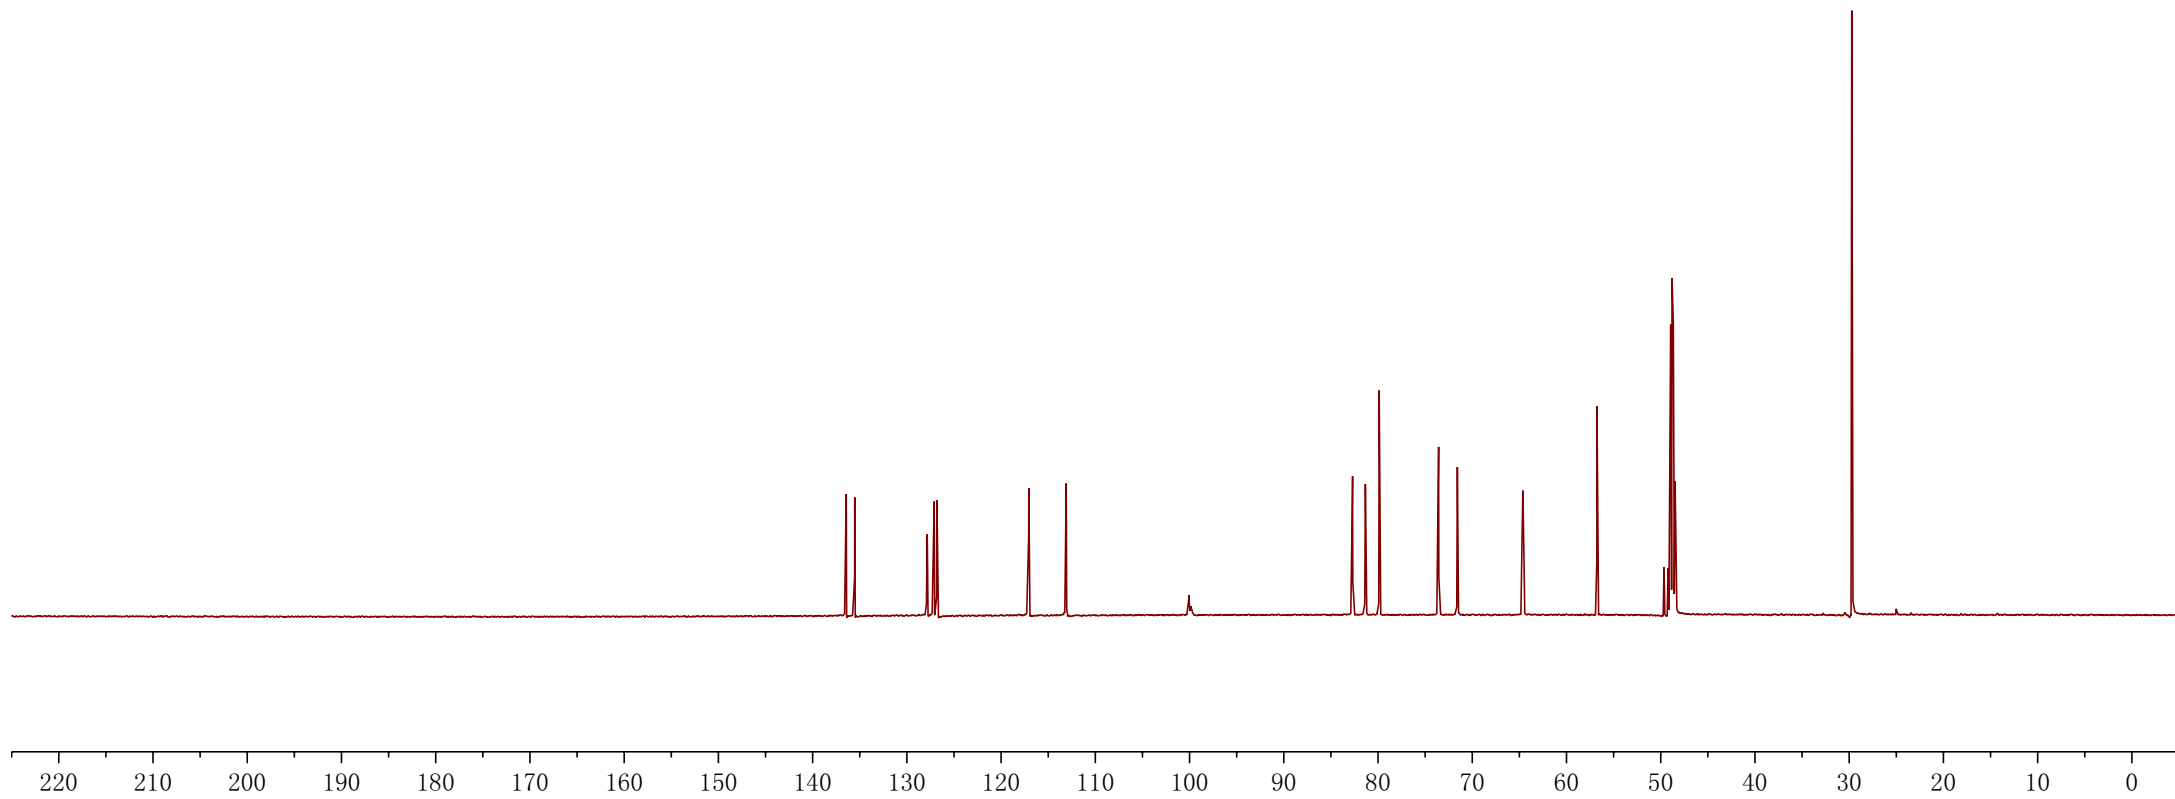



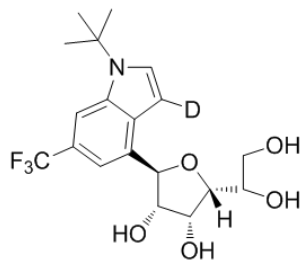

7.87  
7.55  
7.55  
7.36  
7.36

5.23  
5.21  
4.97  
4.40  
4.39  
4.38  
4.30  
4.29  
4.29  
4.28  
4.27  
4.26  
4.11  
3.90  
3.89  
3.87  
3.87  
3.74  
3.73  
3.72  
3.71  
3.35  
3.31

1.72

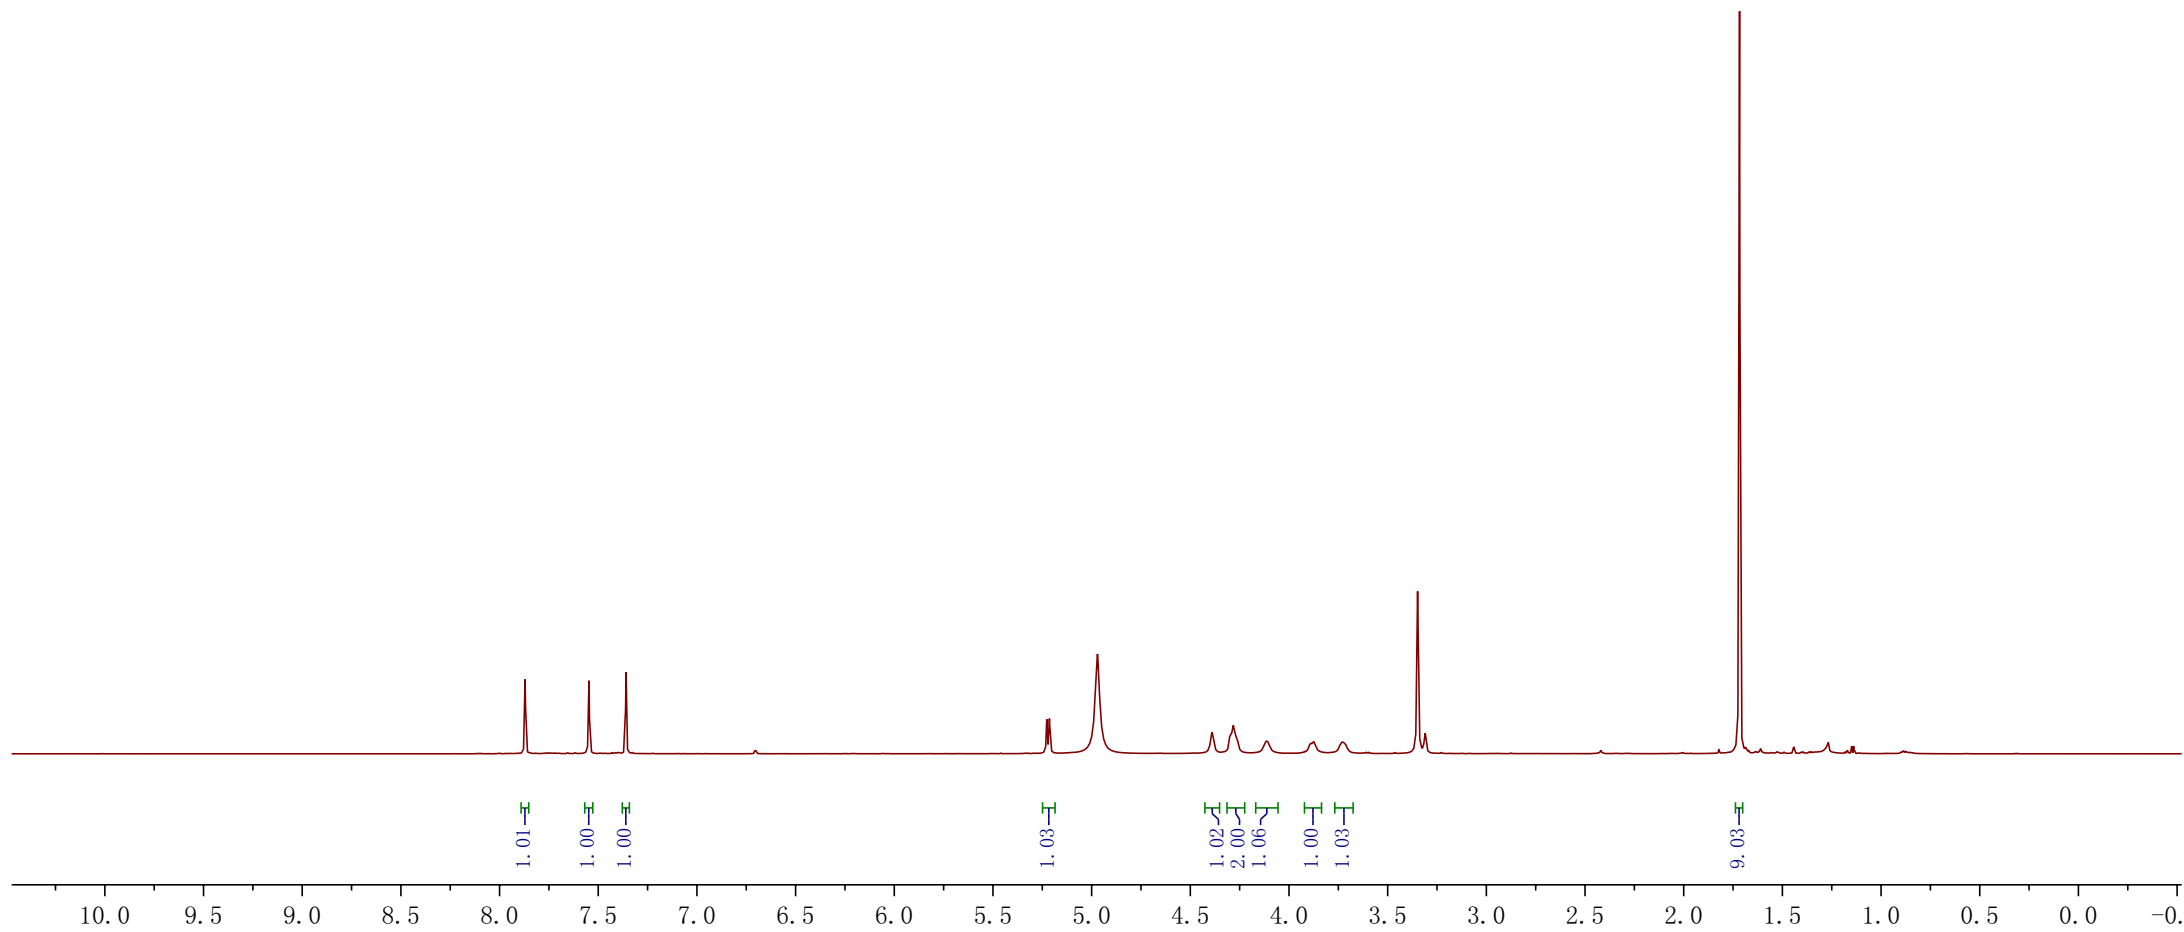

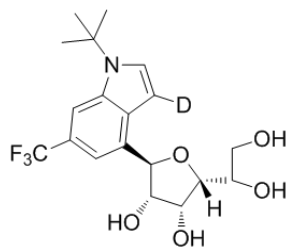

135.04  
131.65  
129.32  
129.15  
127.53  
125.74  
123.94  
123.30  
123.09  
122.88  
122.68  
113.01  
110.59  
100.19  
82.85  
81.28  
79.73  
73.70  
71.74  
64.41  
57.17  
49.64  
49.22  
49.08  
48.94  
48.80  
48.66  
48.52  
48.37  
29.82

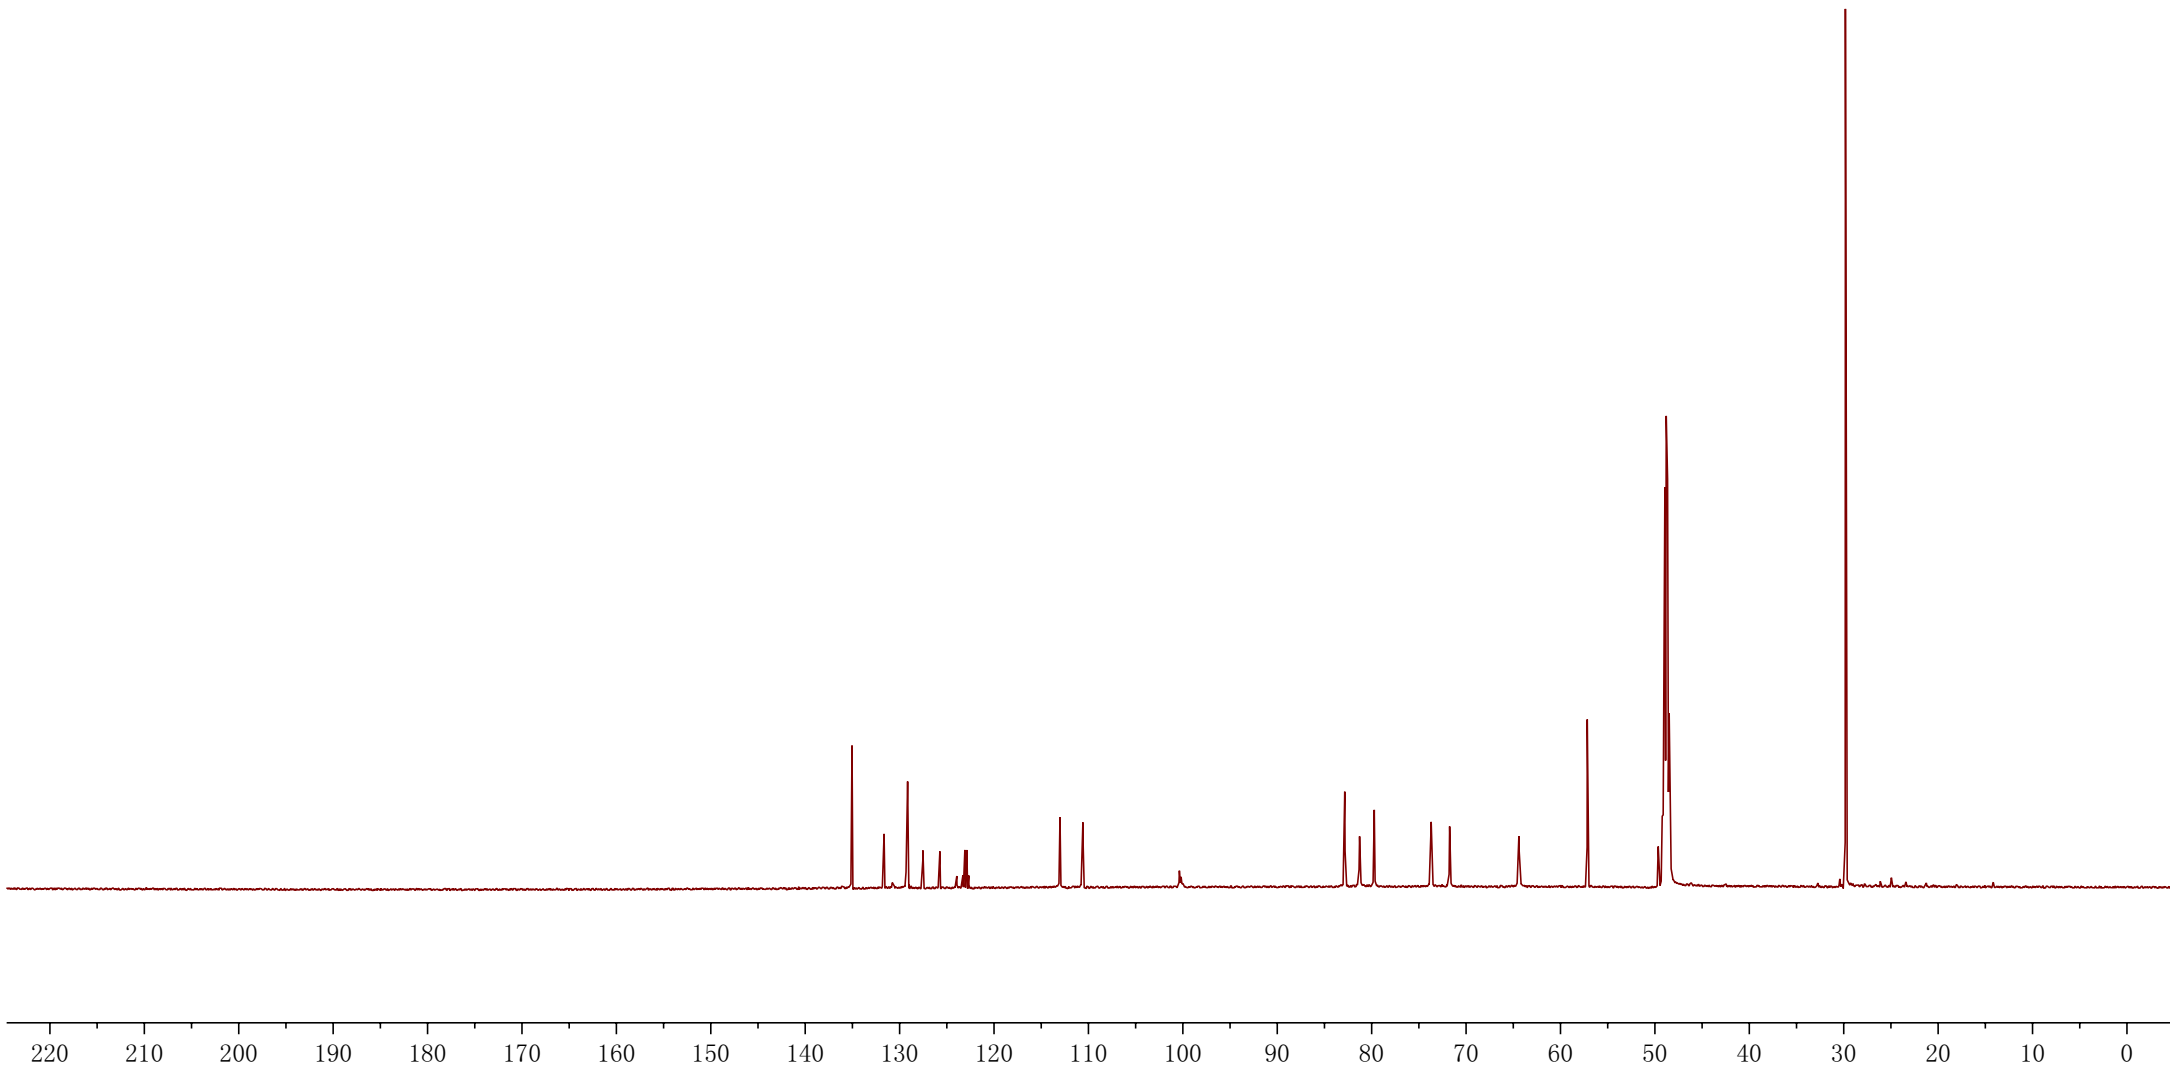

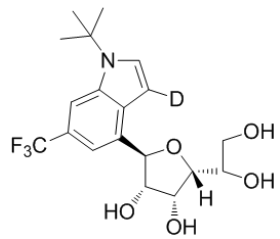

61.54

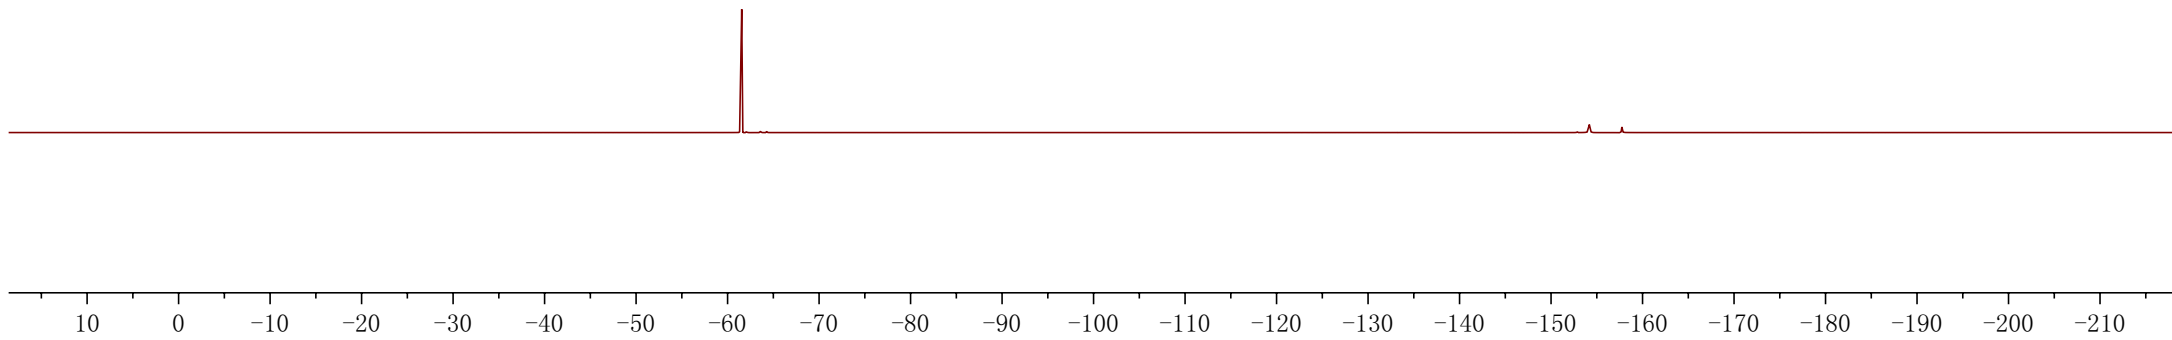

## S10. Reference

1. B.-S. Zhang, Y. Li, Z. Zhang, Y. An, Y.-H. Wen, X.-Y. Gou, S.-Q. Quan, X.-G. Wang and Y.-M. Liang, *J. Am. Chem. Soc.* **2019**, *141*, 9731-9738.
2. Q. Wang, S. An, Z. Deng, W. Zhu, Z. Huang, G. He and G. Chen, *Nature Catalysis* **2019**, *2*, 793-800.
3. Z. Ma, X. Wang, X. Wang, R. A. Rodriguez, C. E. Moore, S. Gao, X. Tan, Y. Ma, A. L. Rheingold, P. S. Baran and C. Chen, *Science*, **2014**, *346*, 219.
4. D. I. Chai, P. Thansandote and M. Lautens, *Chem. Eur. J.* **2011**, *17*, 8175-8188.
